# Supplementary material for: Population Mobility Trends, Deprivation Index and the Spatio-Temporal Spread of Coronavirus Disease 2019 in Ireland
Source: Int J Environ Res Public Health. 2021 Jun 10;18(12):6285. doi: 10.3390/ijerph18126285 (PMC8296107; doi:10.3390/ijerph18126285)

Crude Age & Sex Standardised Incidence Ratio's

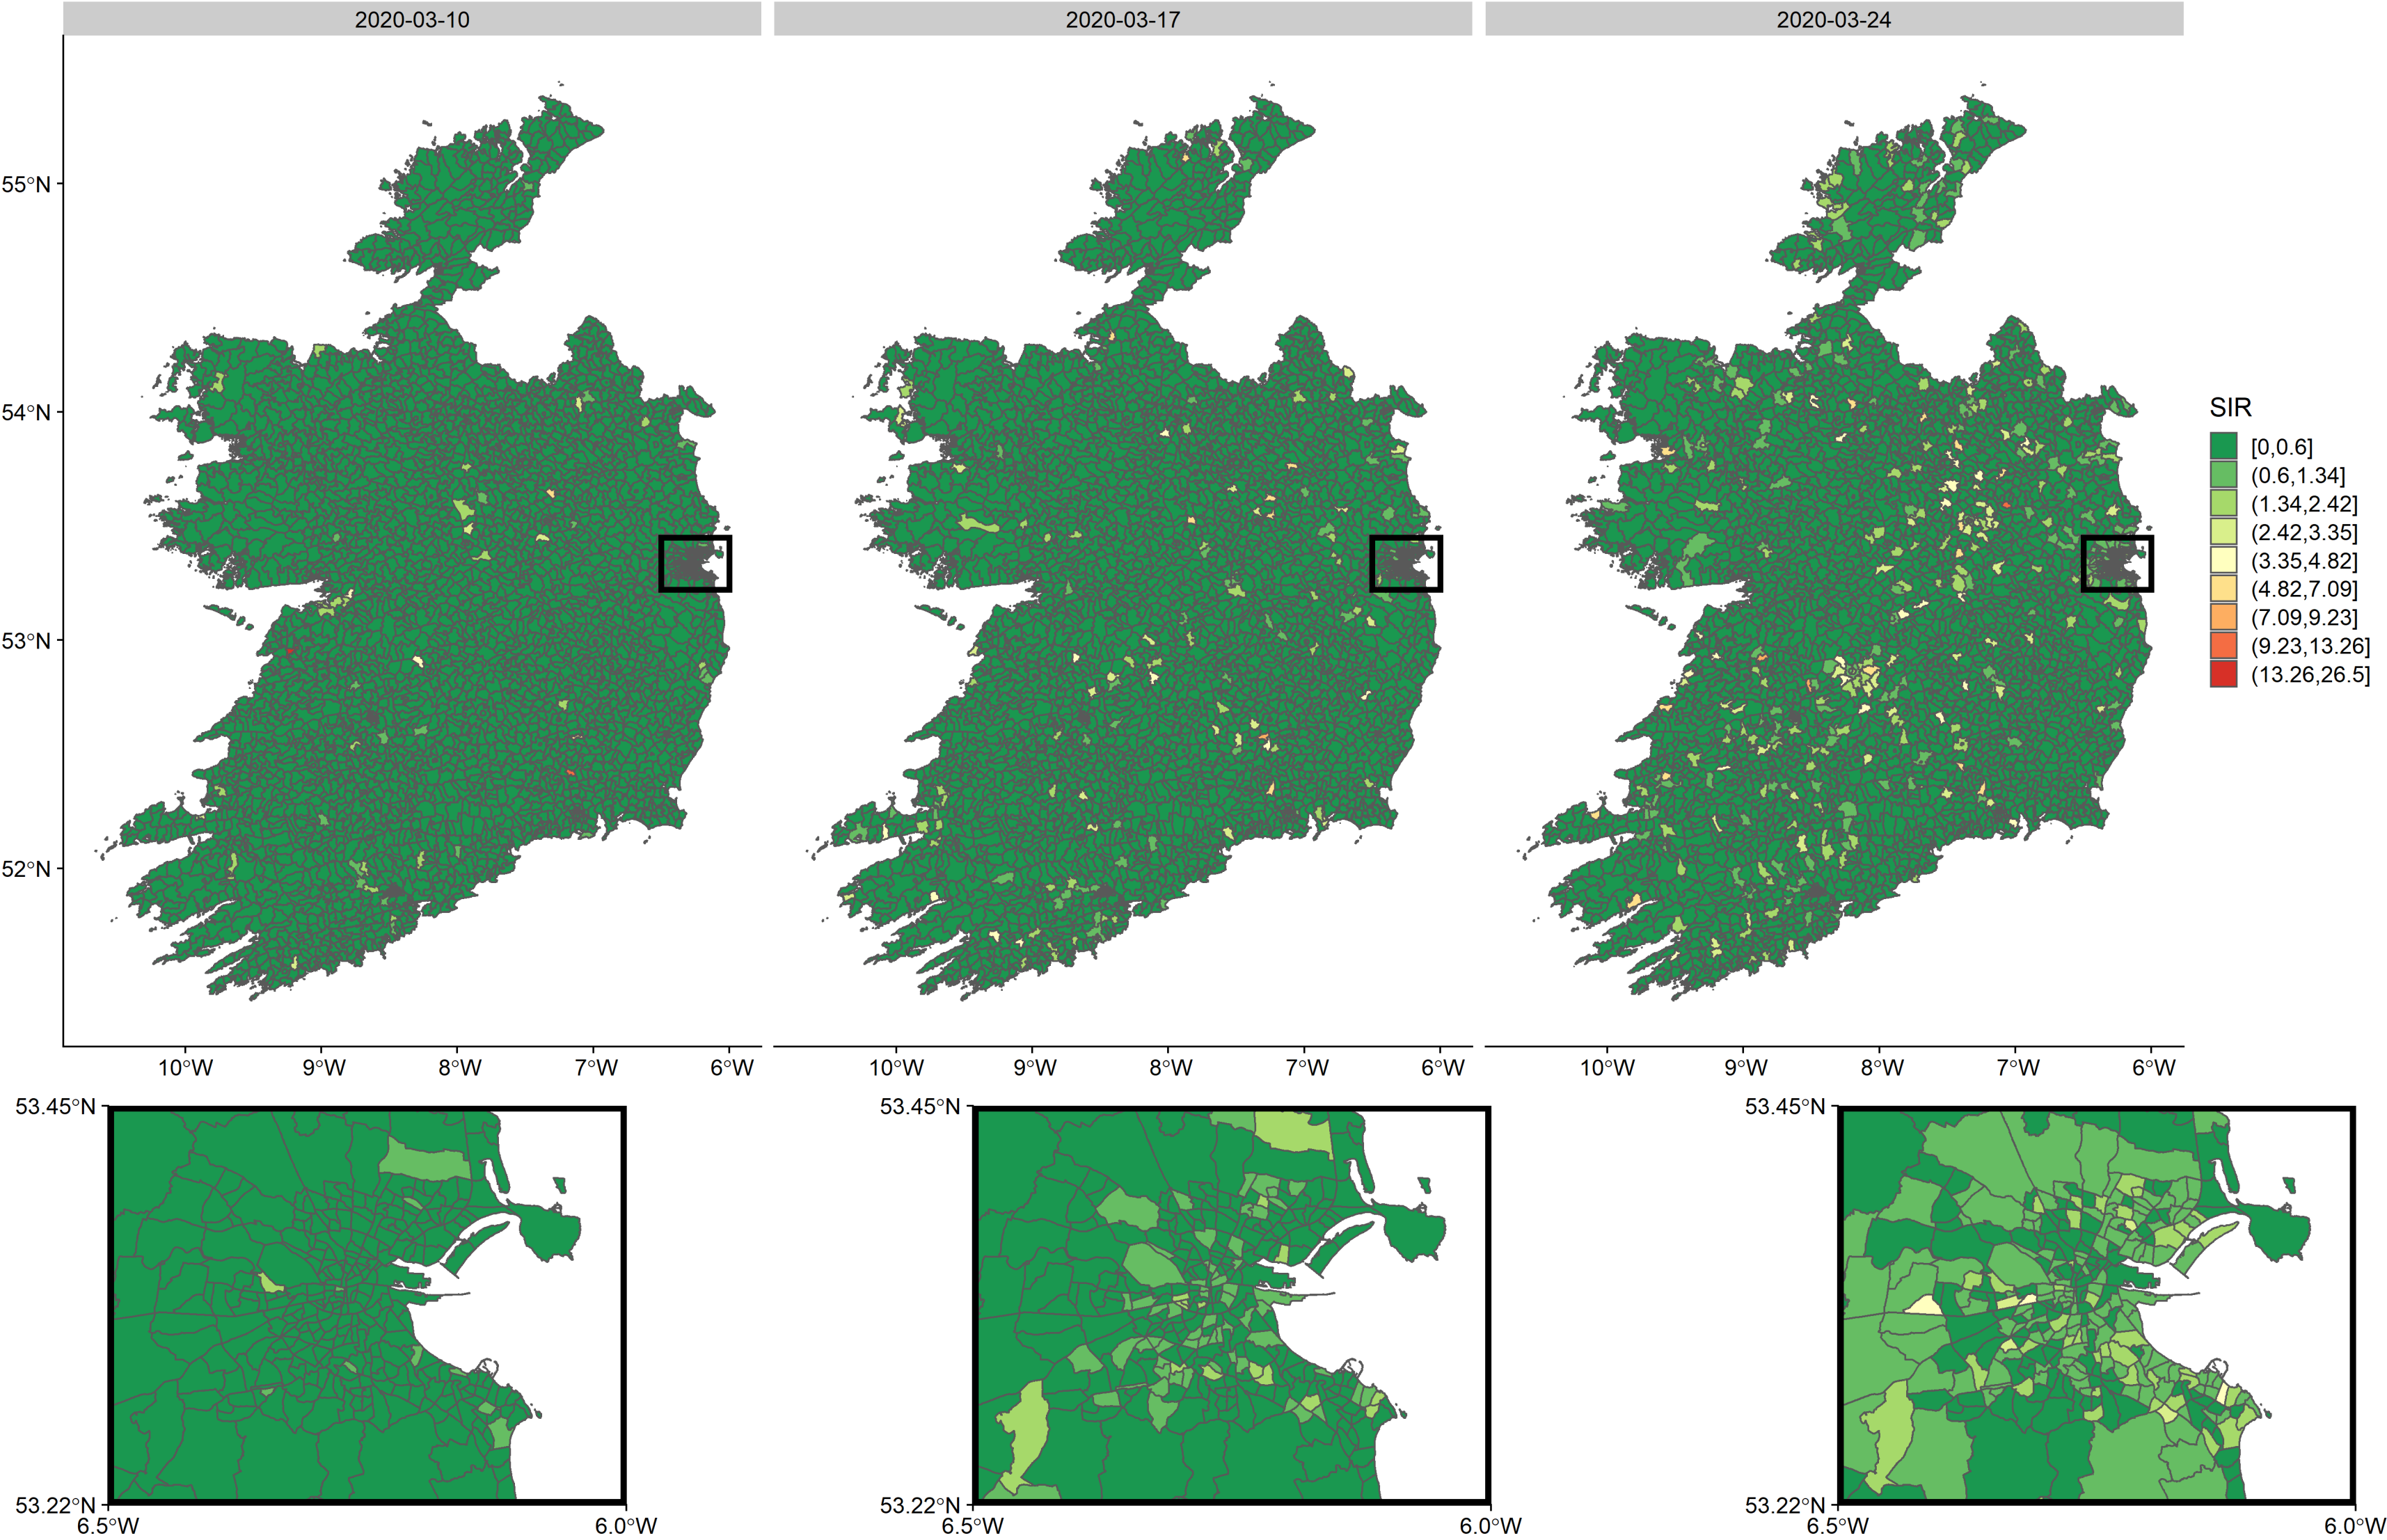

Crude Age & Sex Standardised Incidence Ratio's

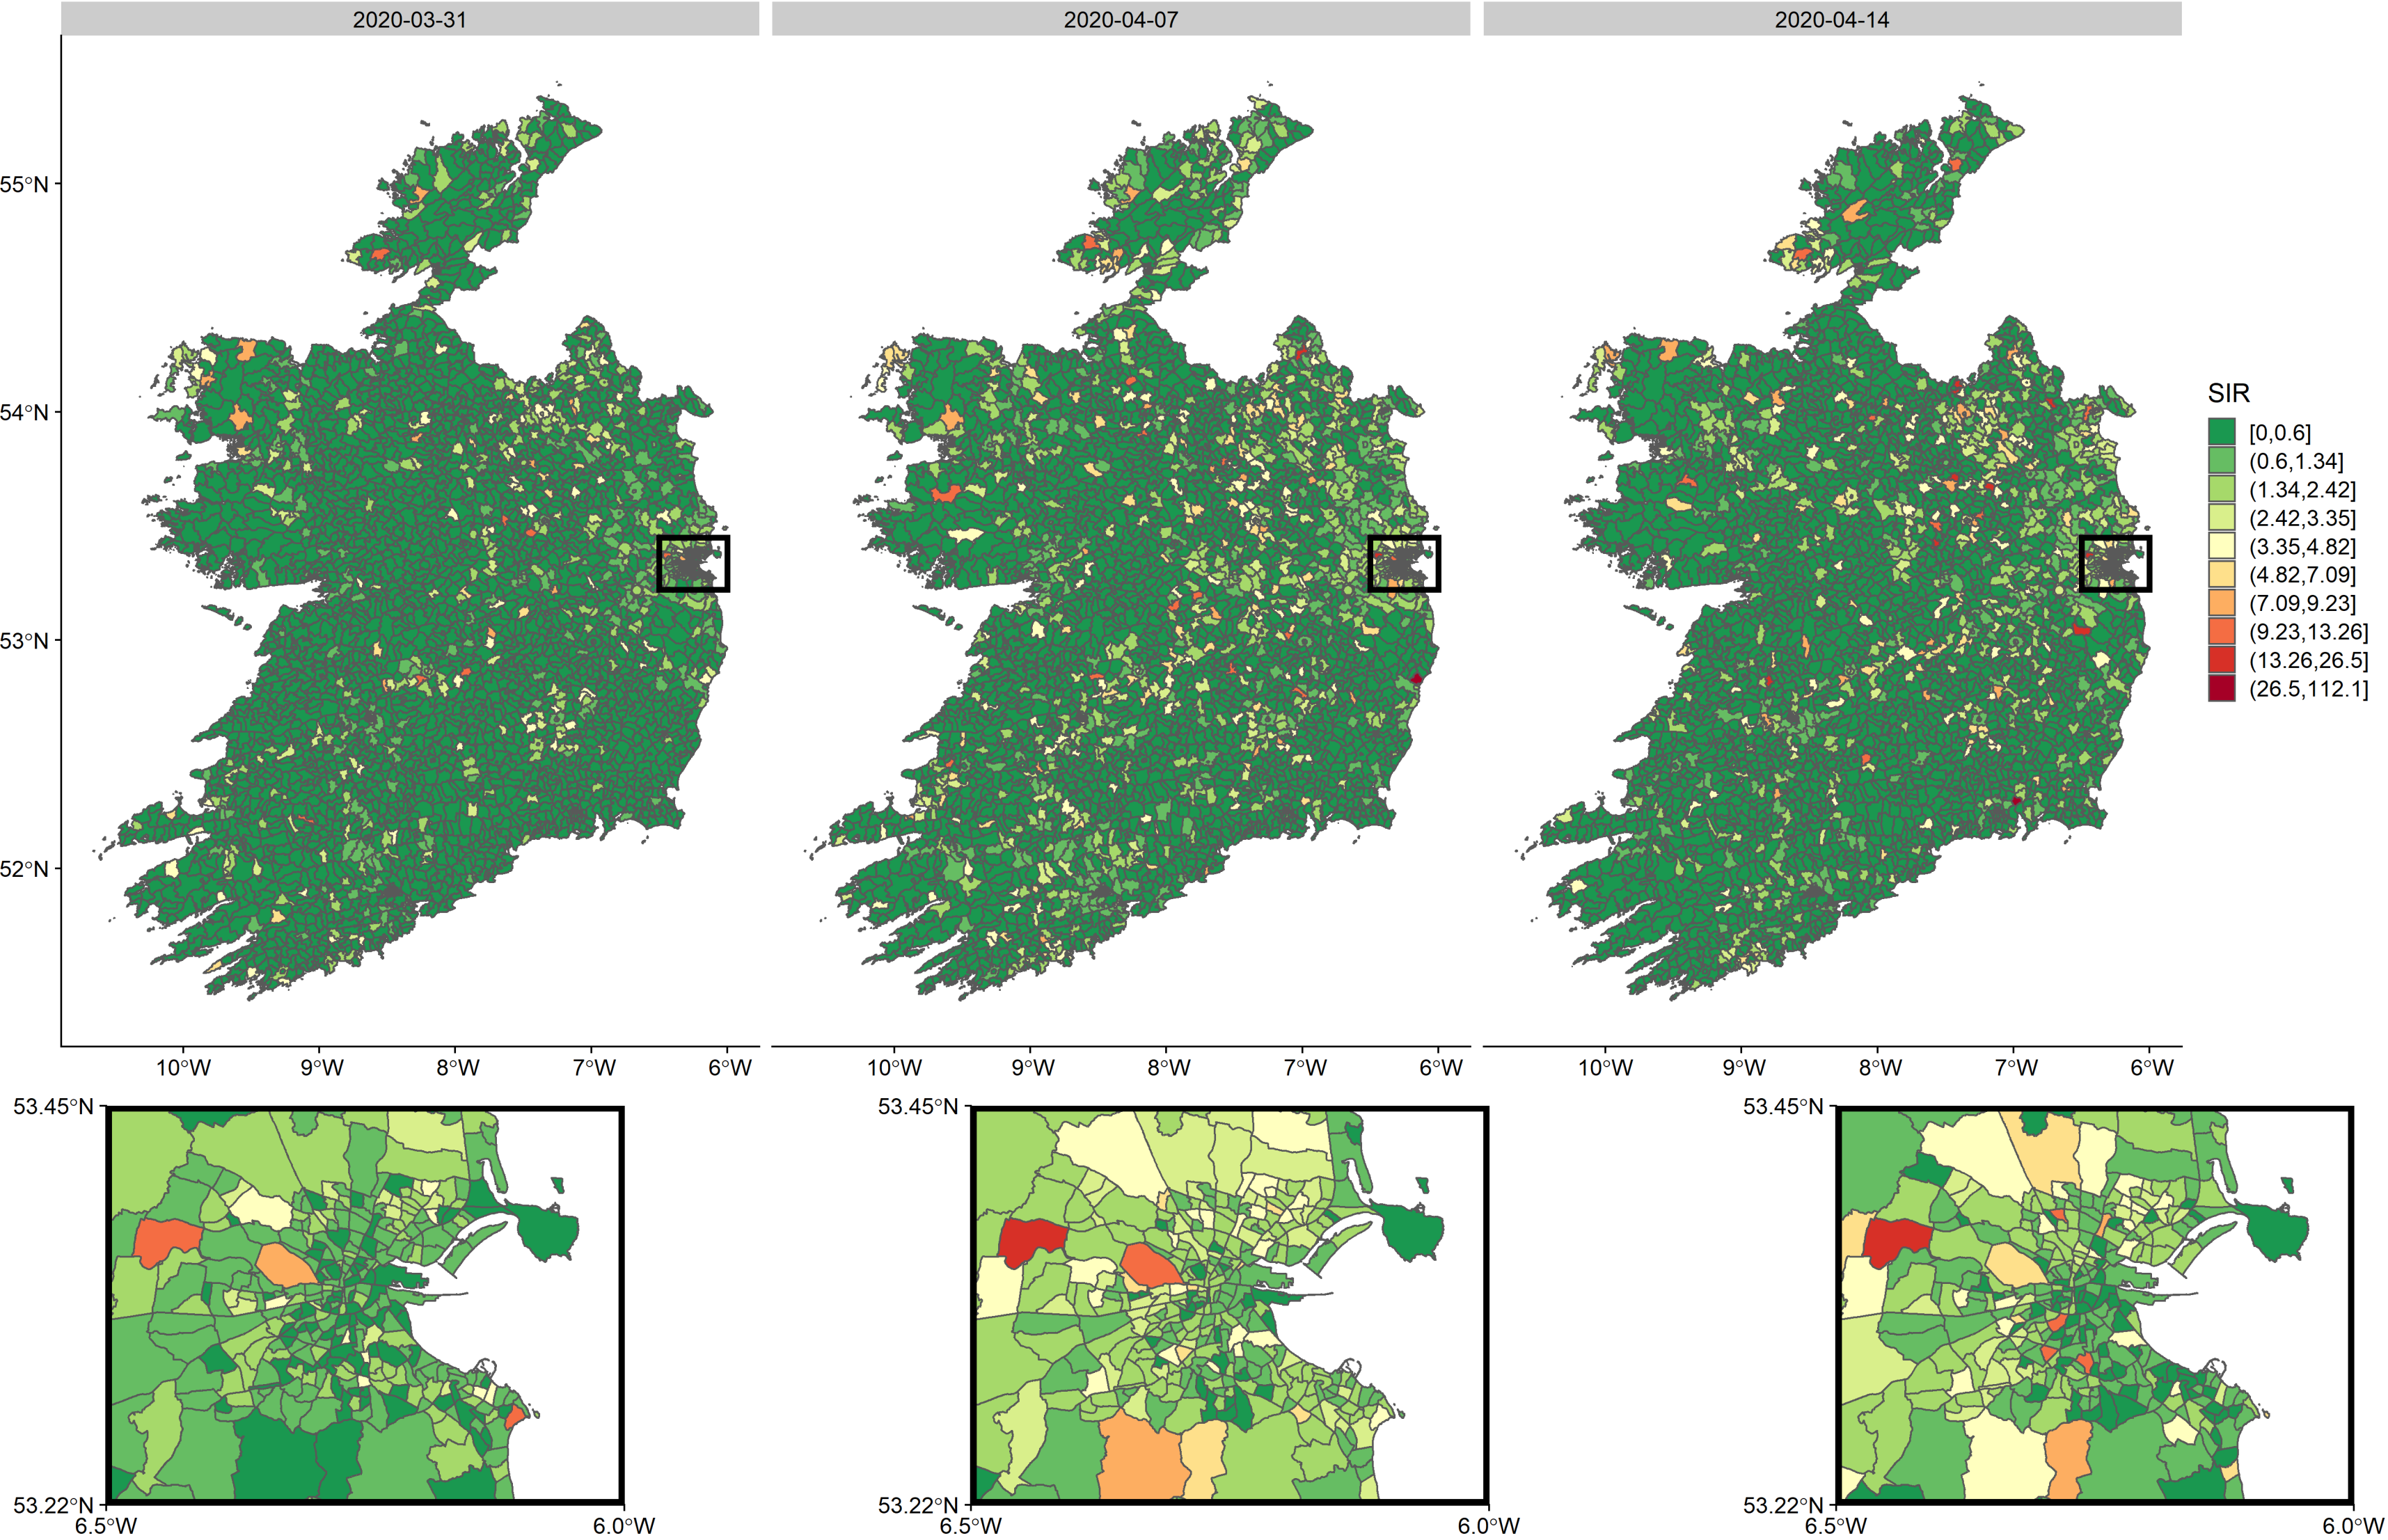

Crude Age & Sex Standardised Incidence Ratio's

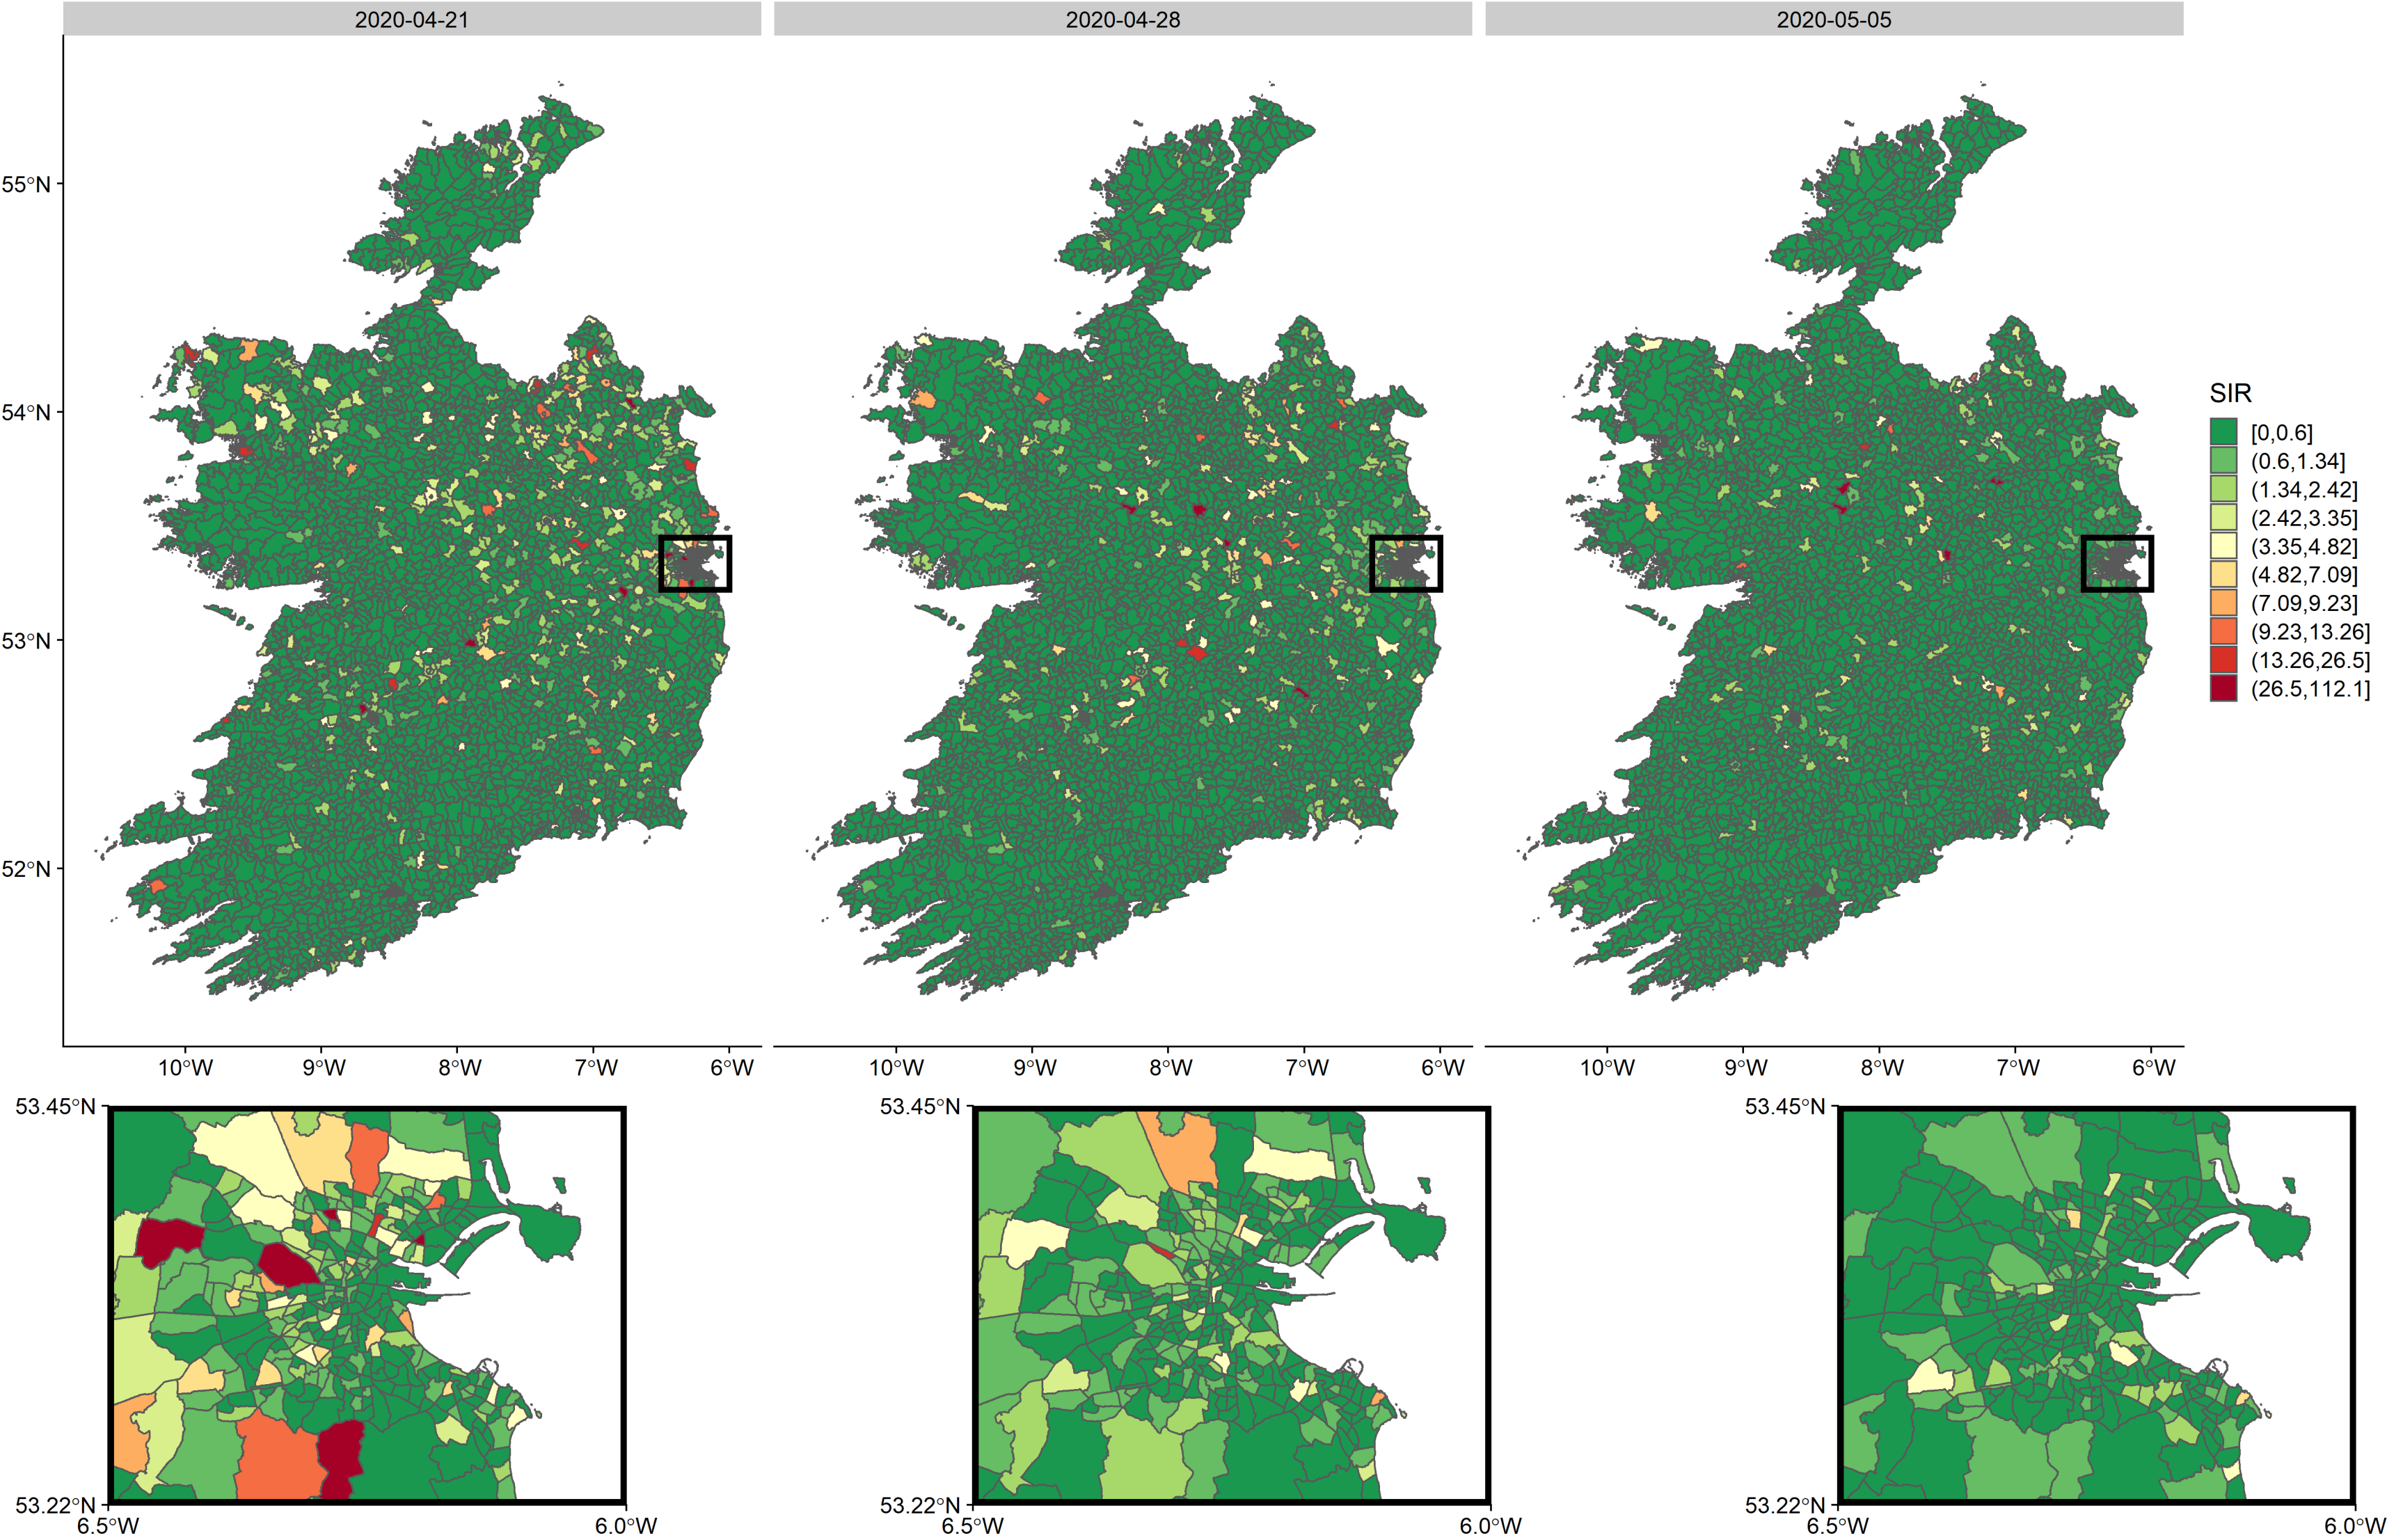

Crude Age & Sex Standardised Incidence Ratio's

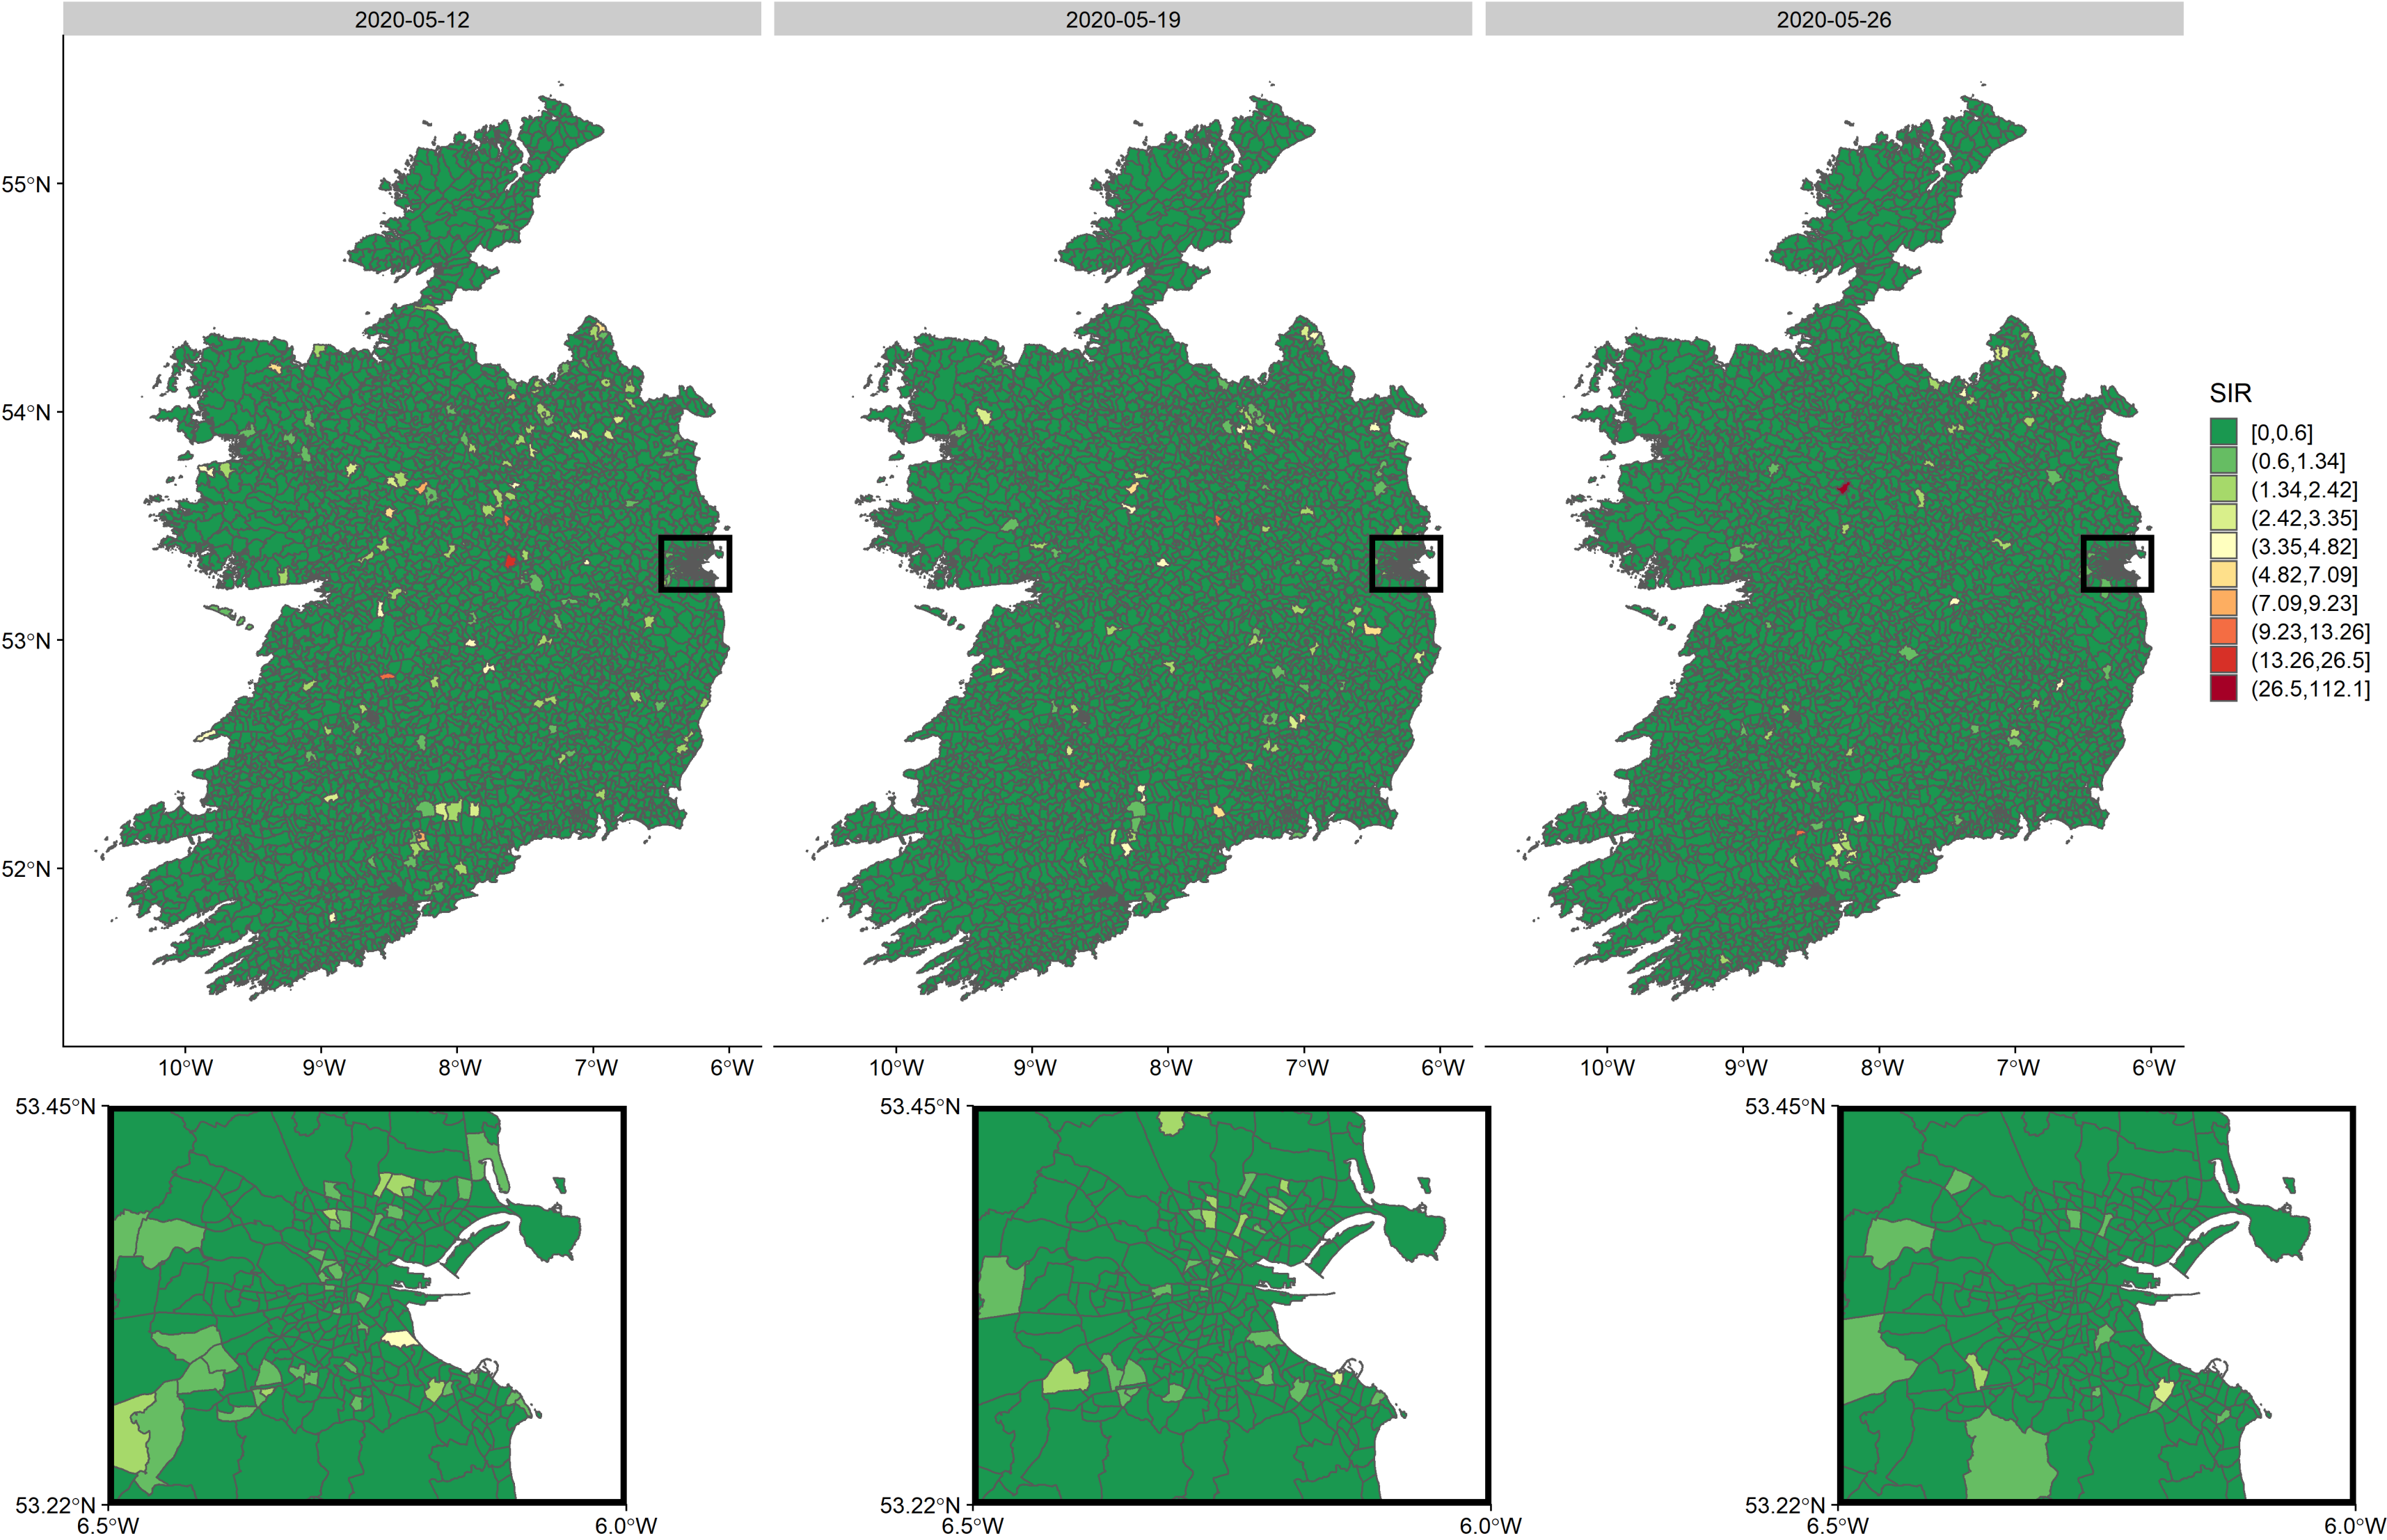

Crude Age & Sex Standardised Incidence Ratio's

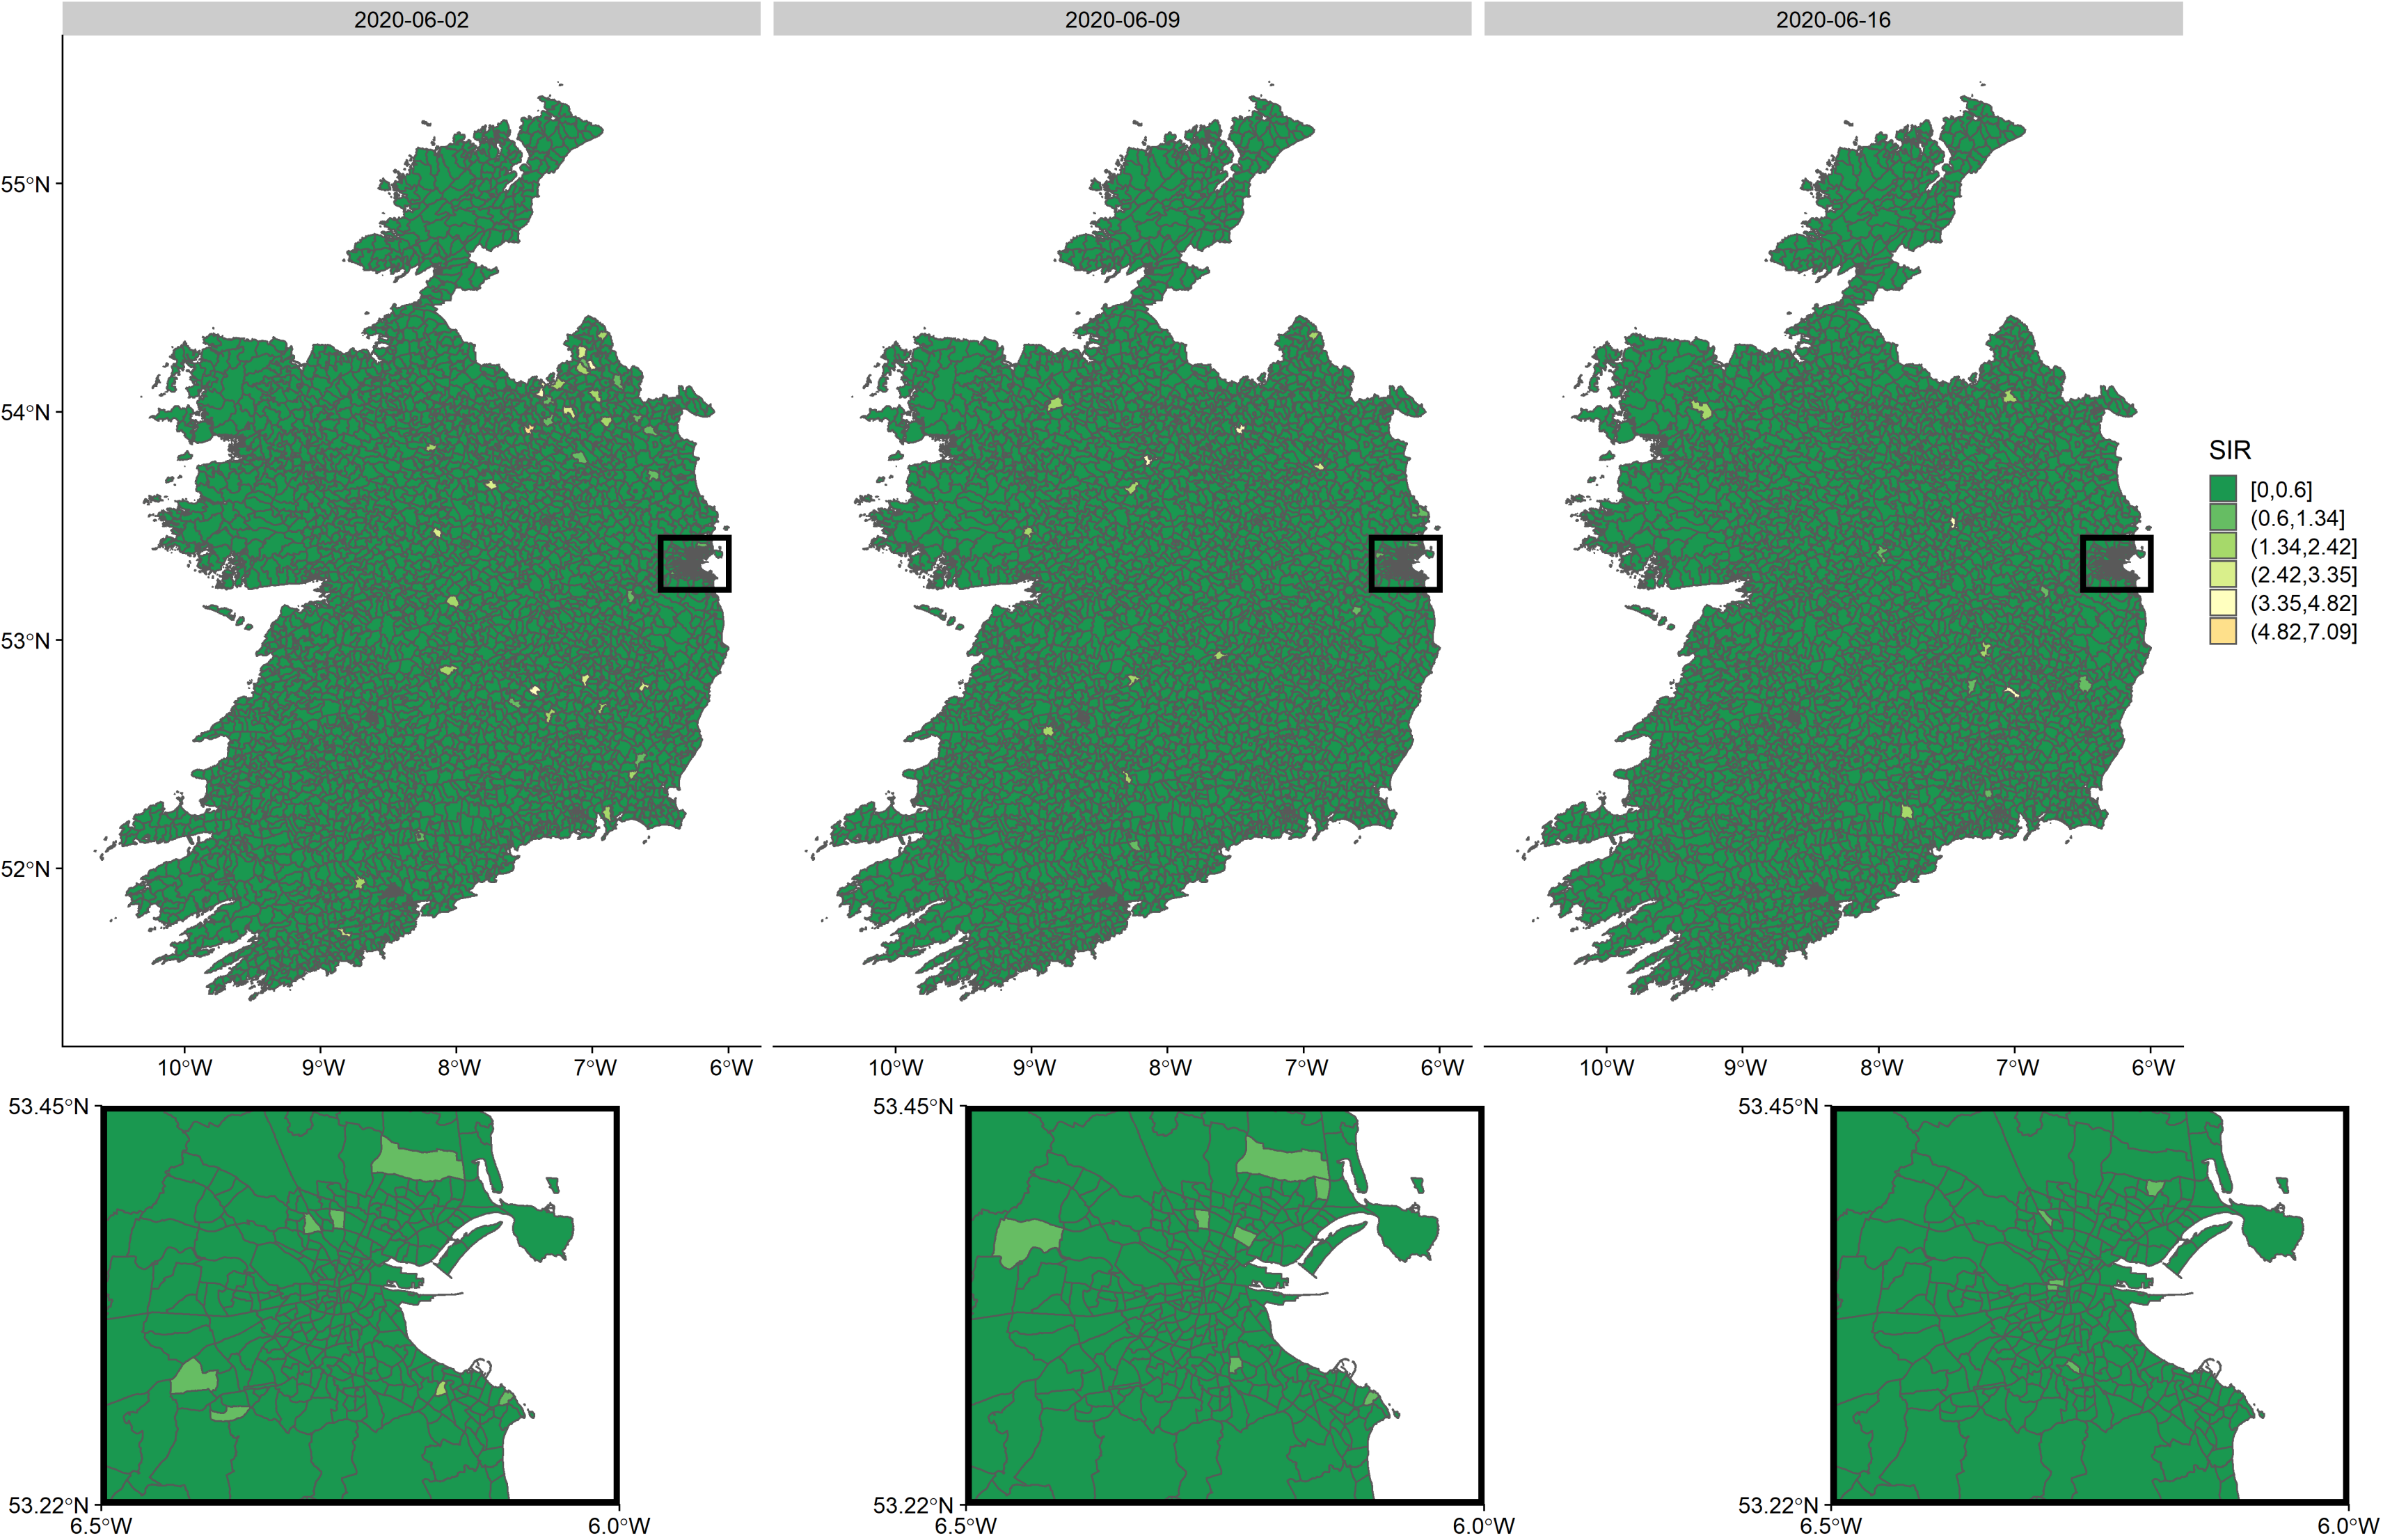

Crude Age & Sex Standardised Incidence Ratio's

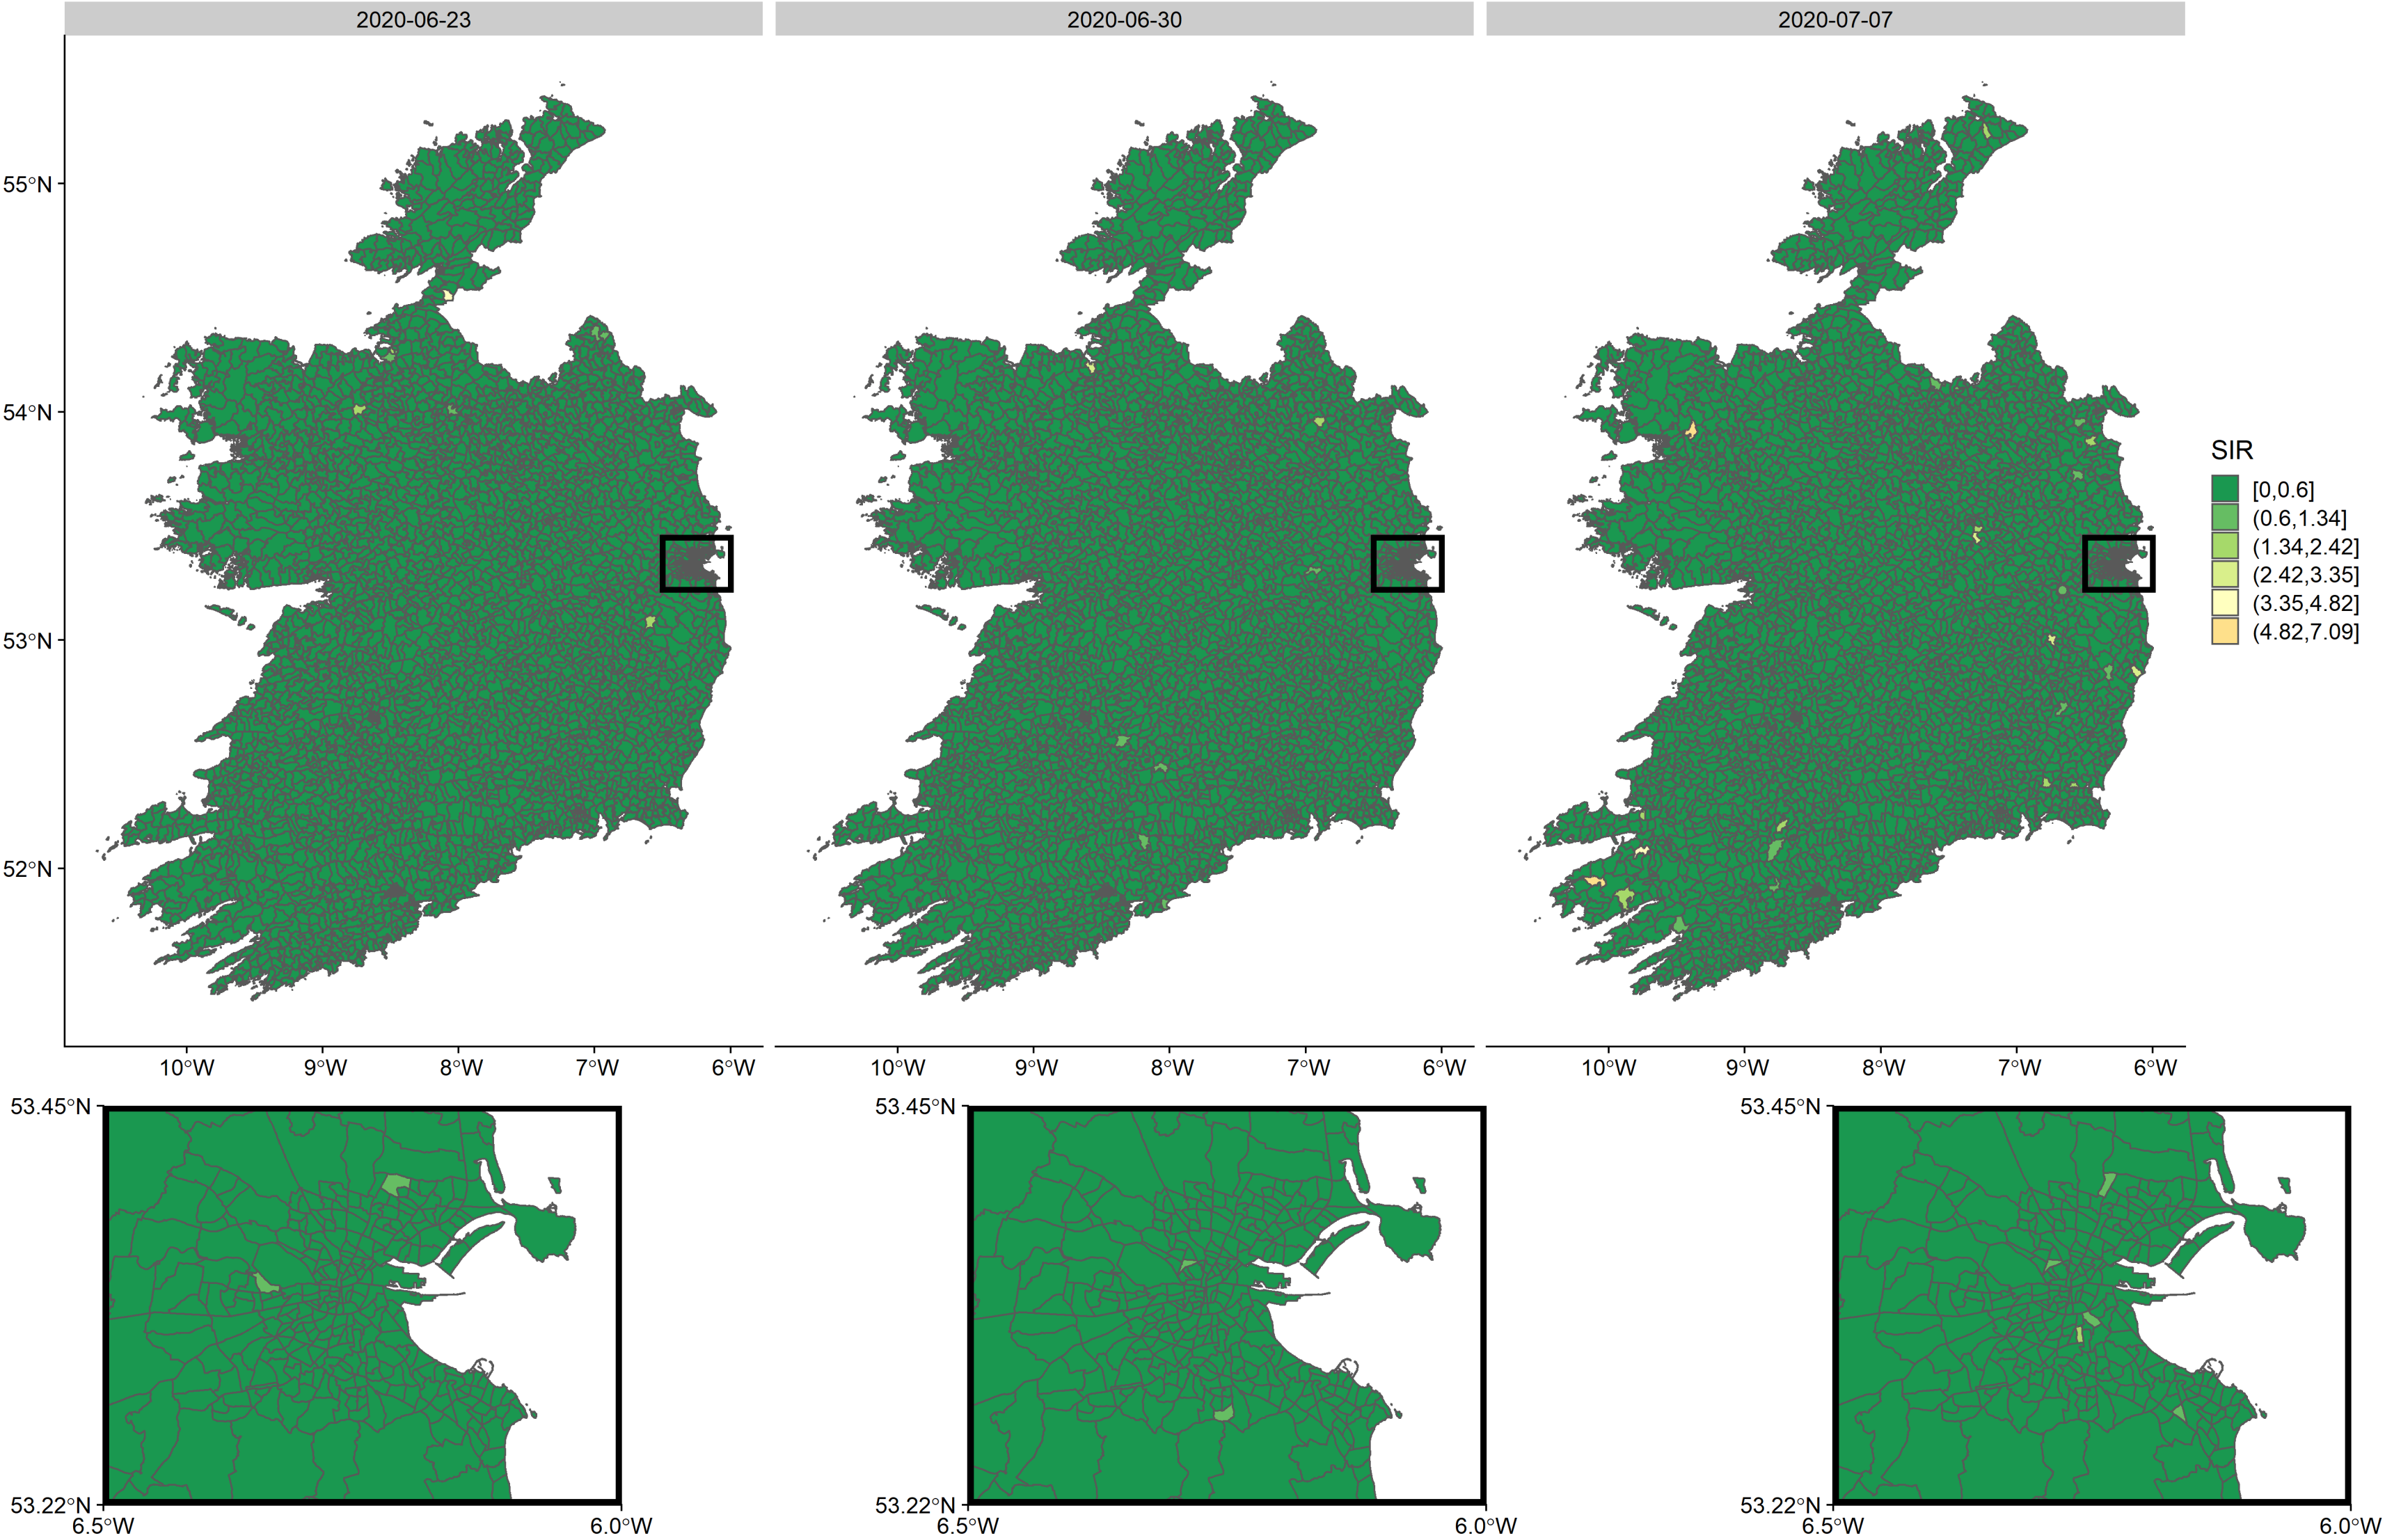

Crude Age & Sex Standardised Incidence Ratio's

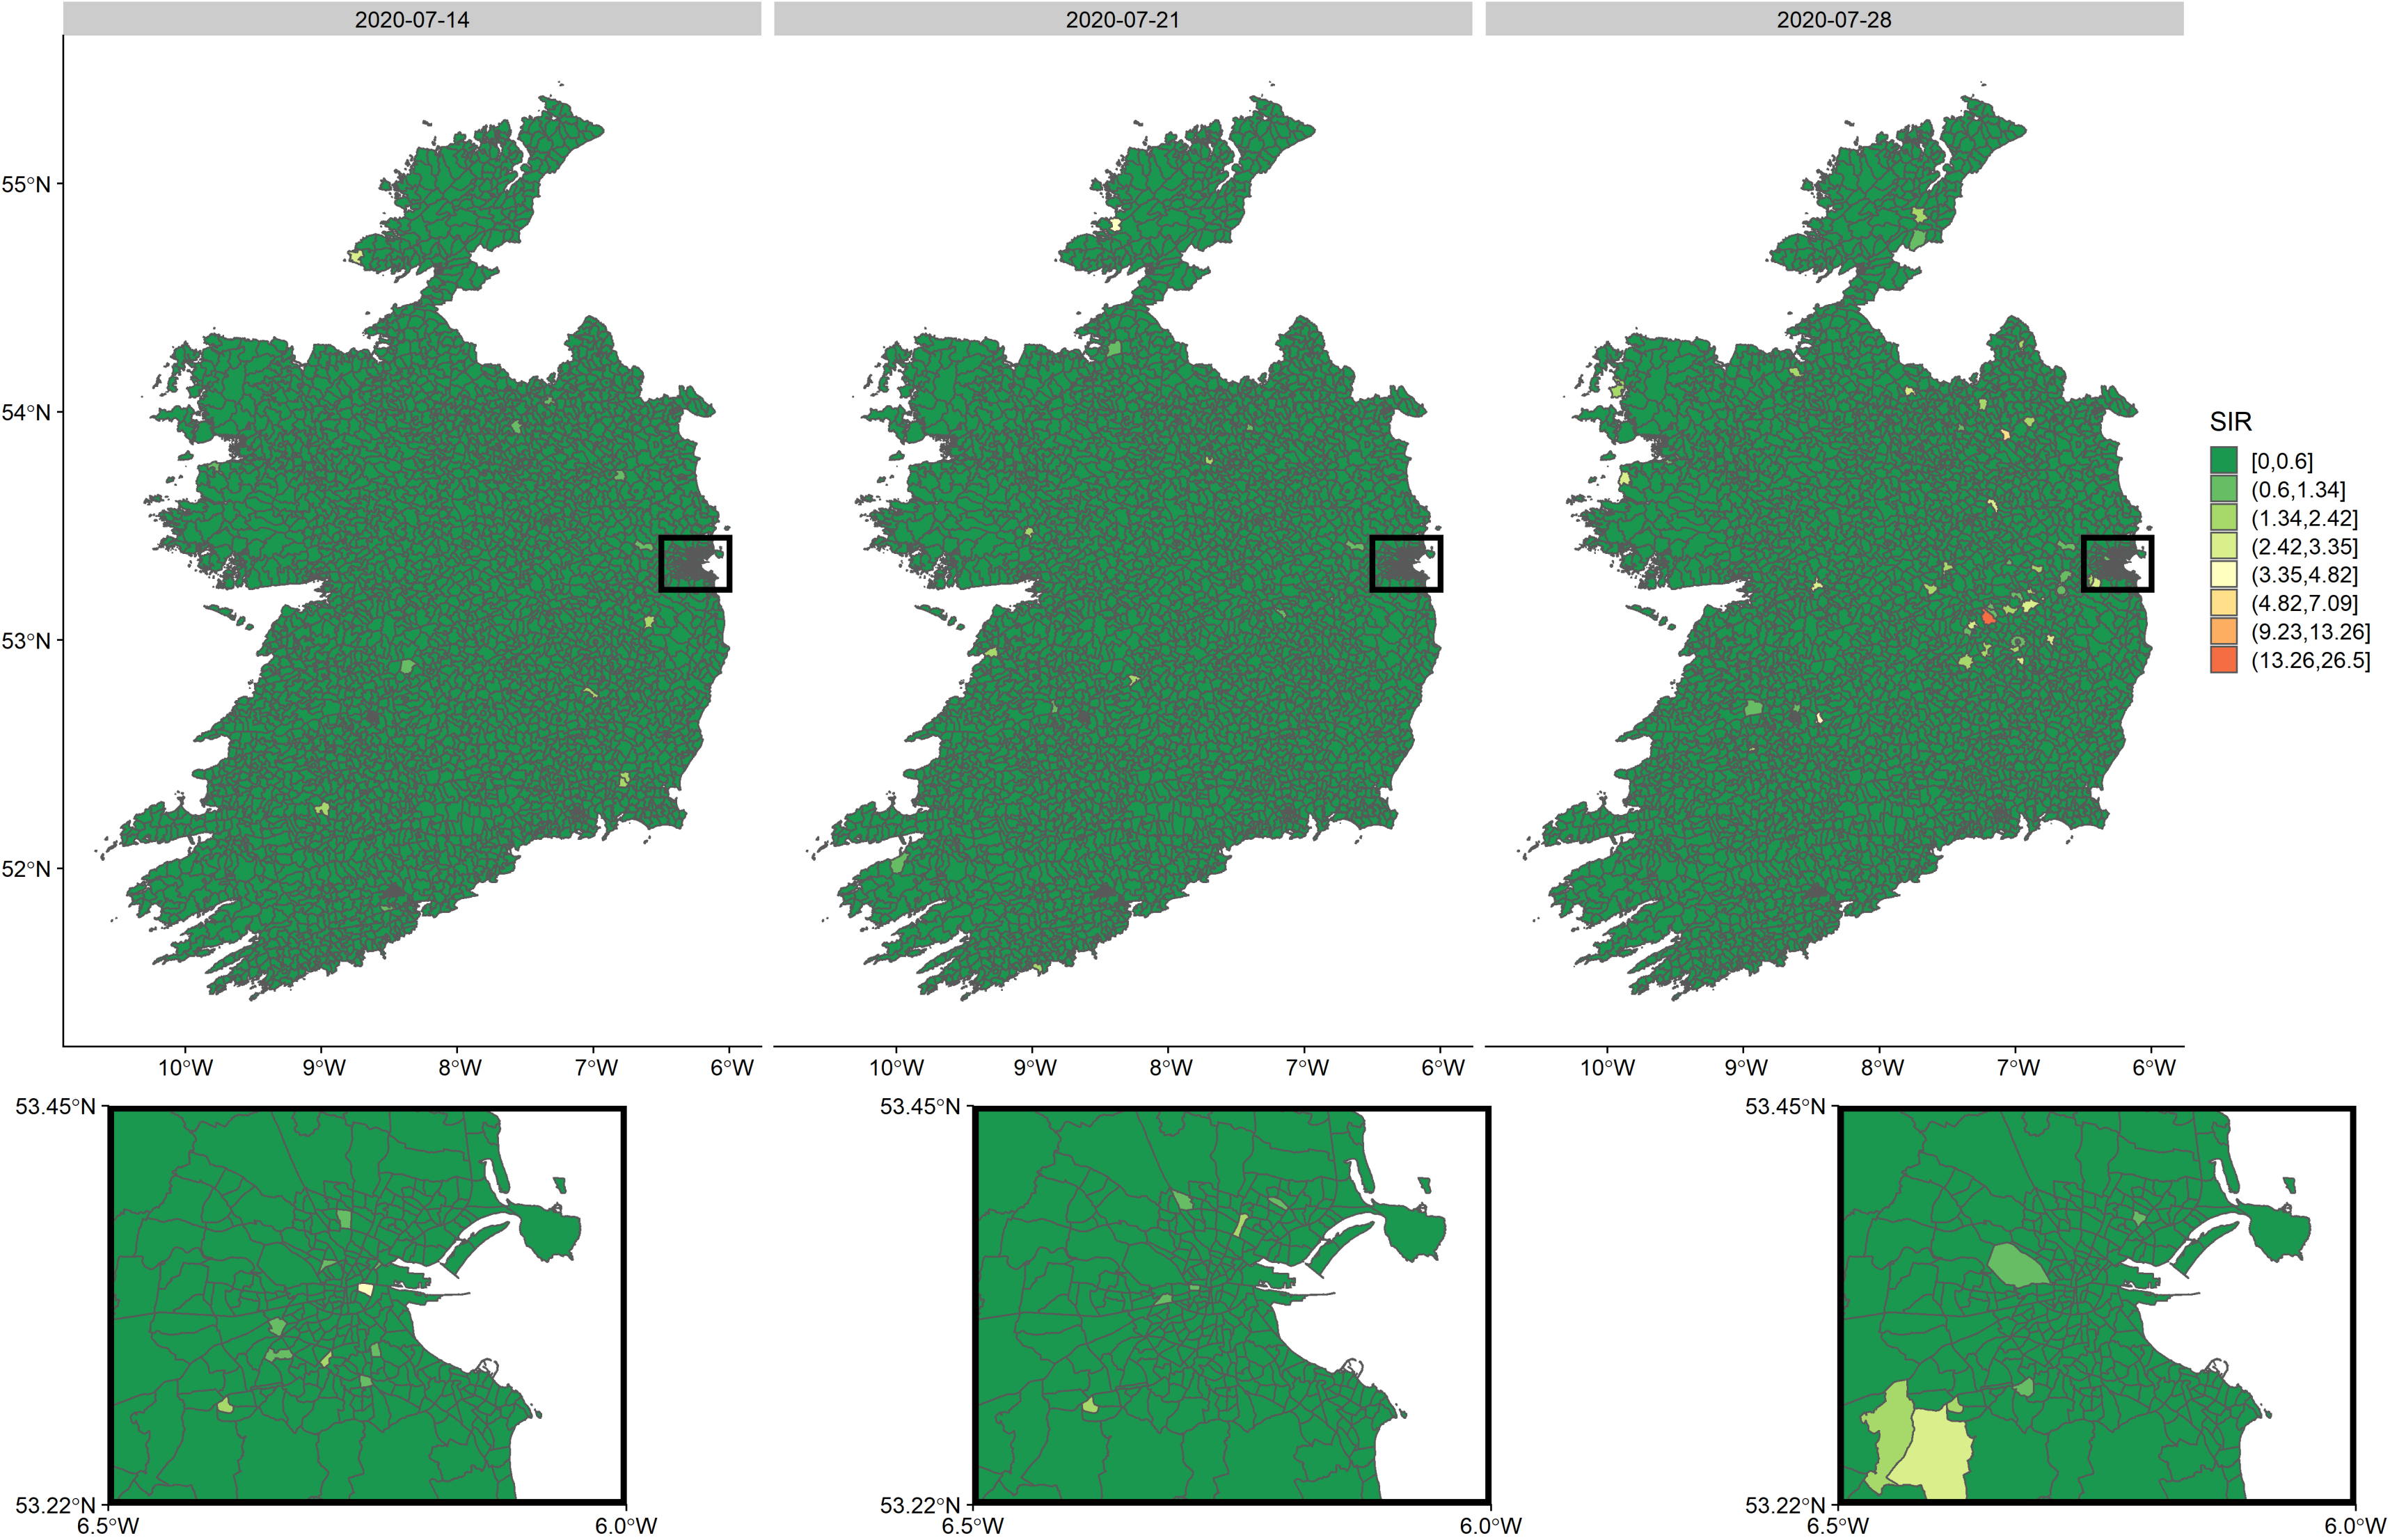

Crude Age & Sex Standardised Incidence Ratio's

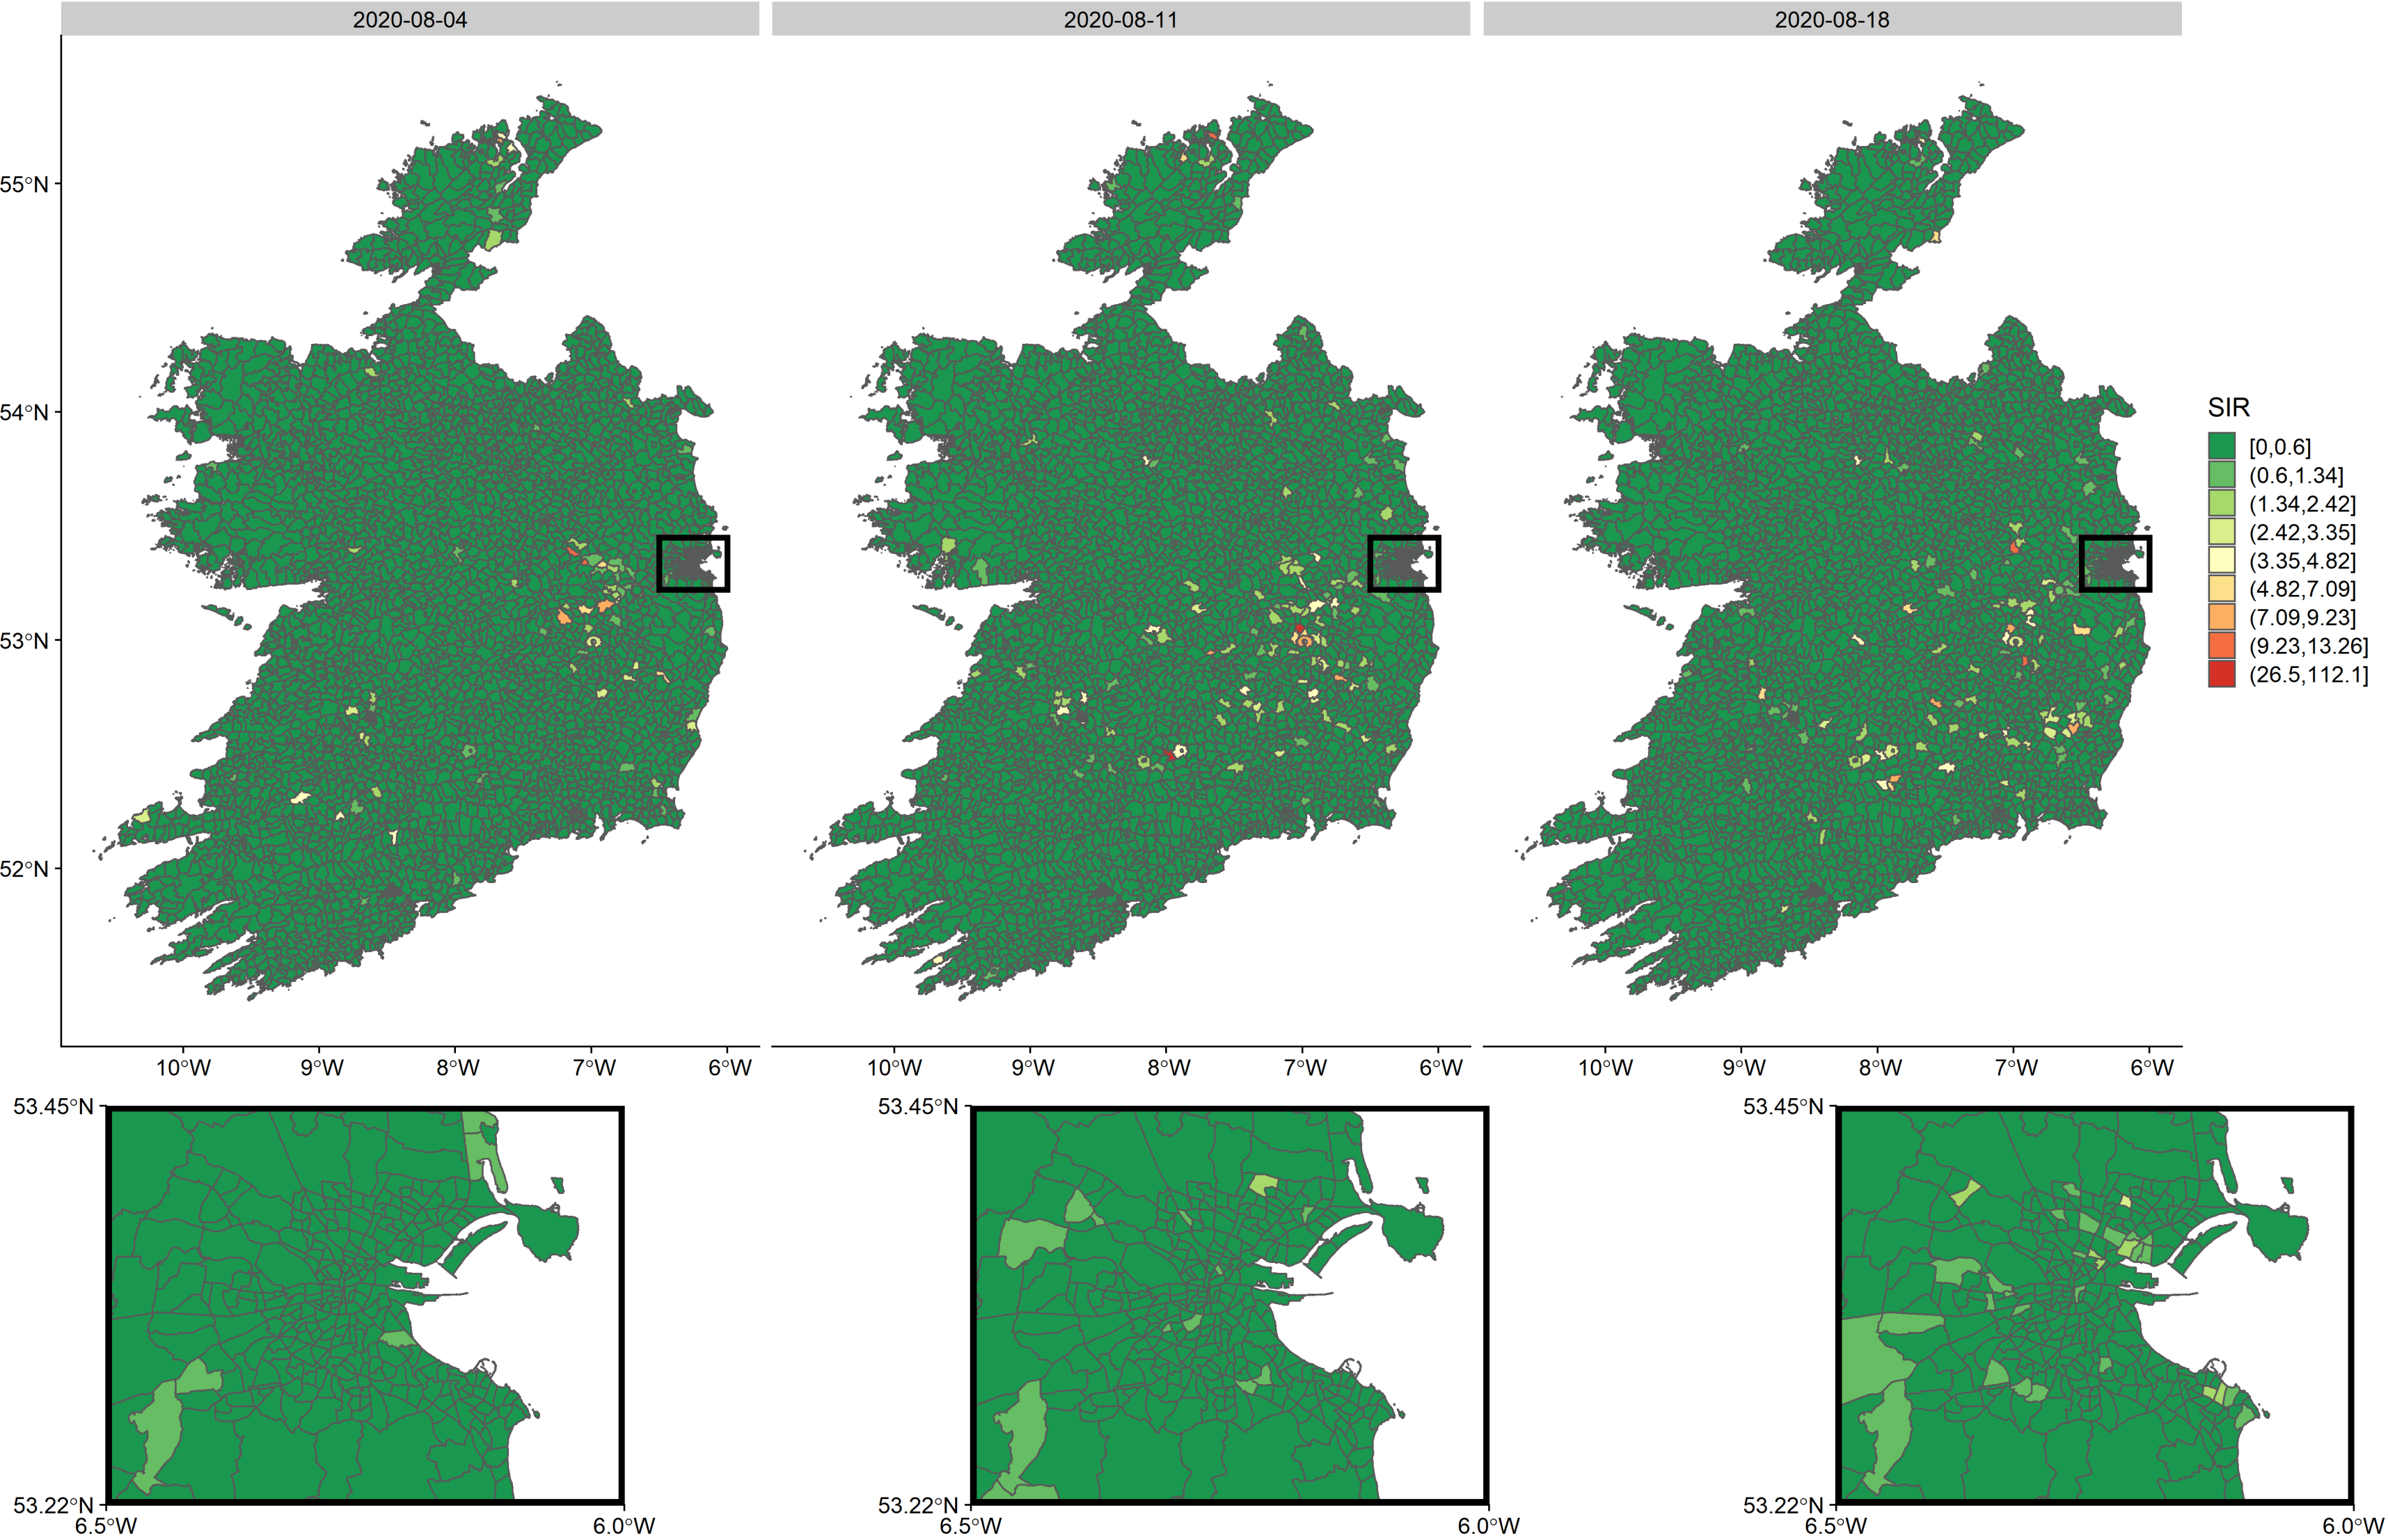

Crude Age & Sex Standardised Incidence Ratio's

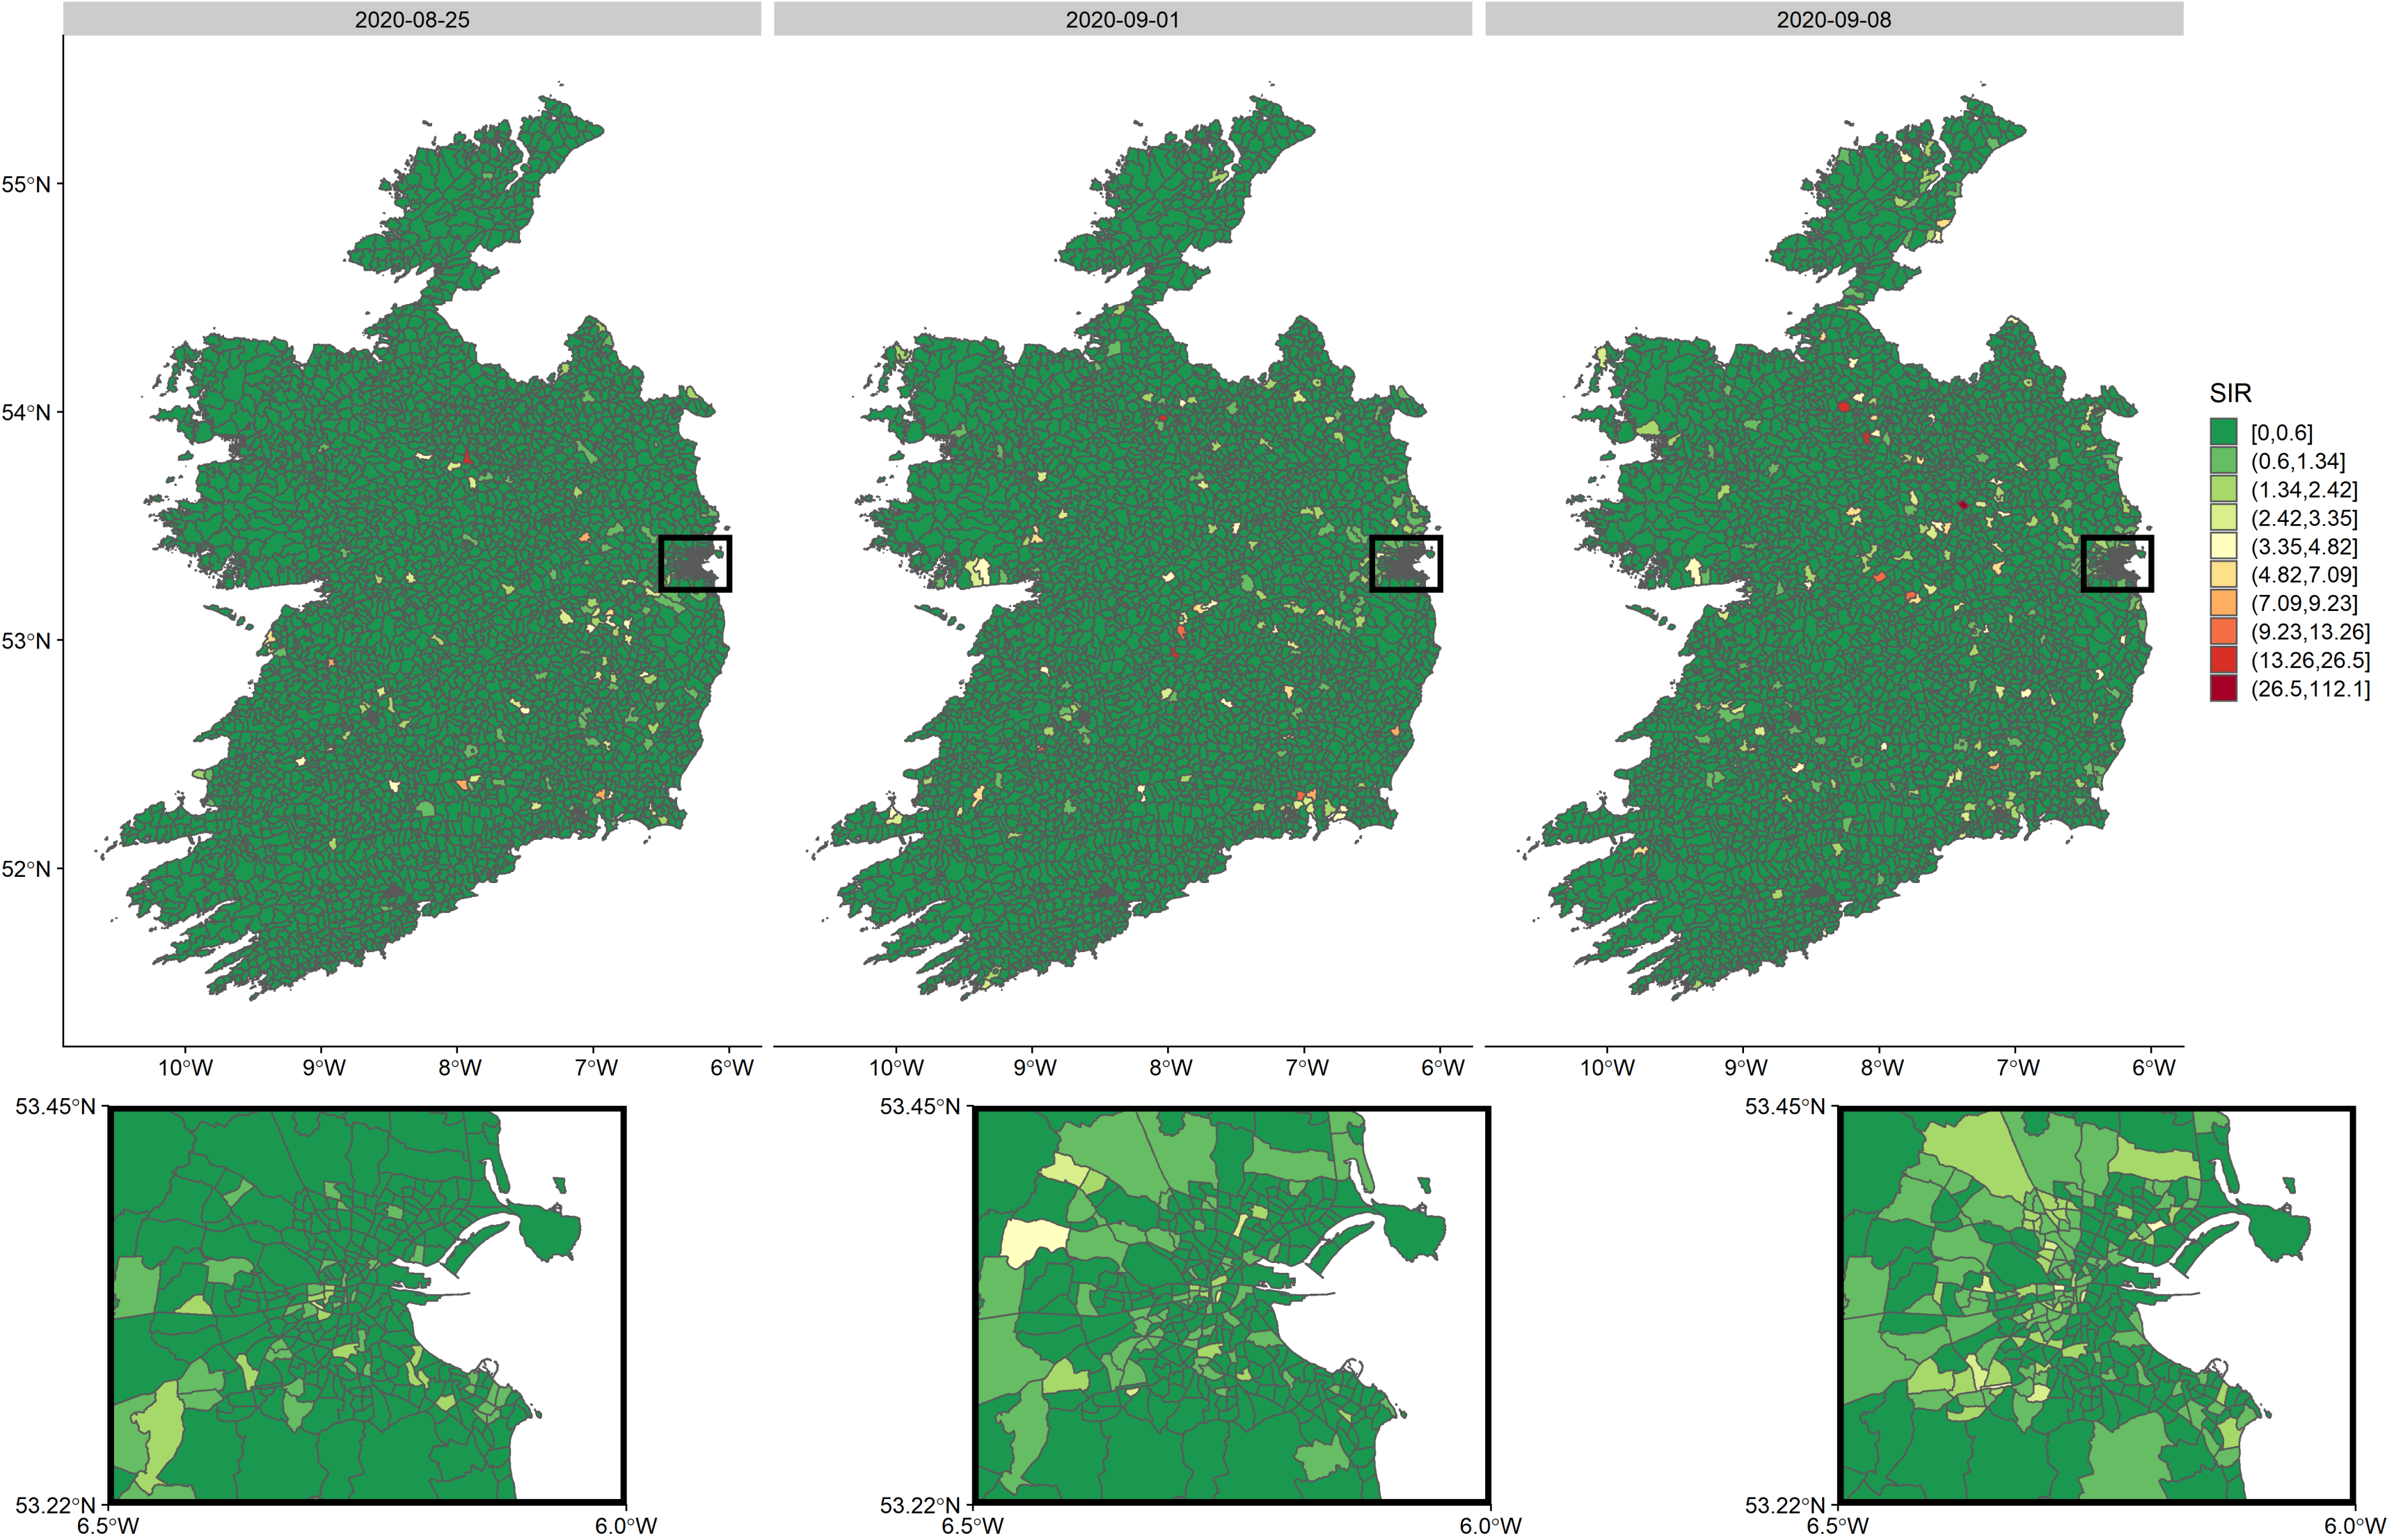

Crude Age & Sex Standardised Incidence Ratio's

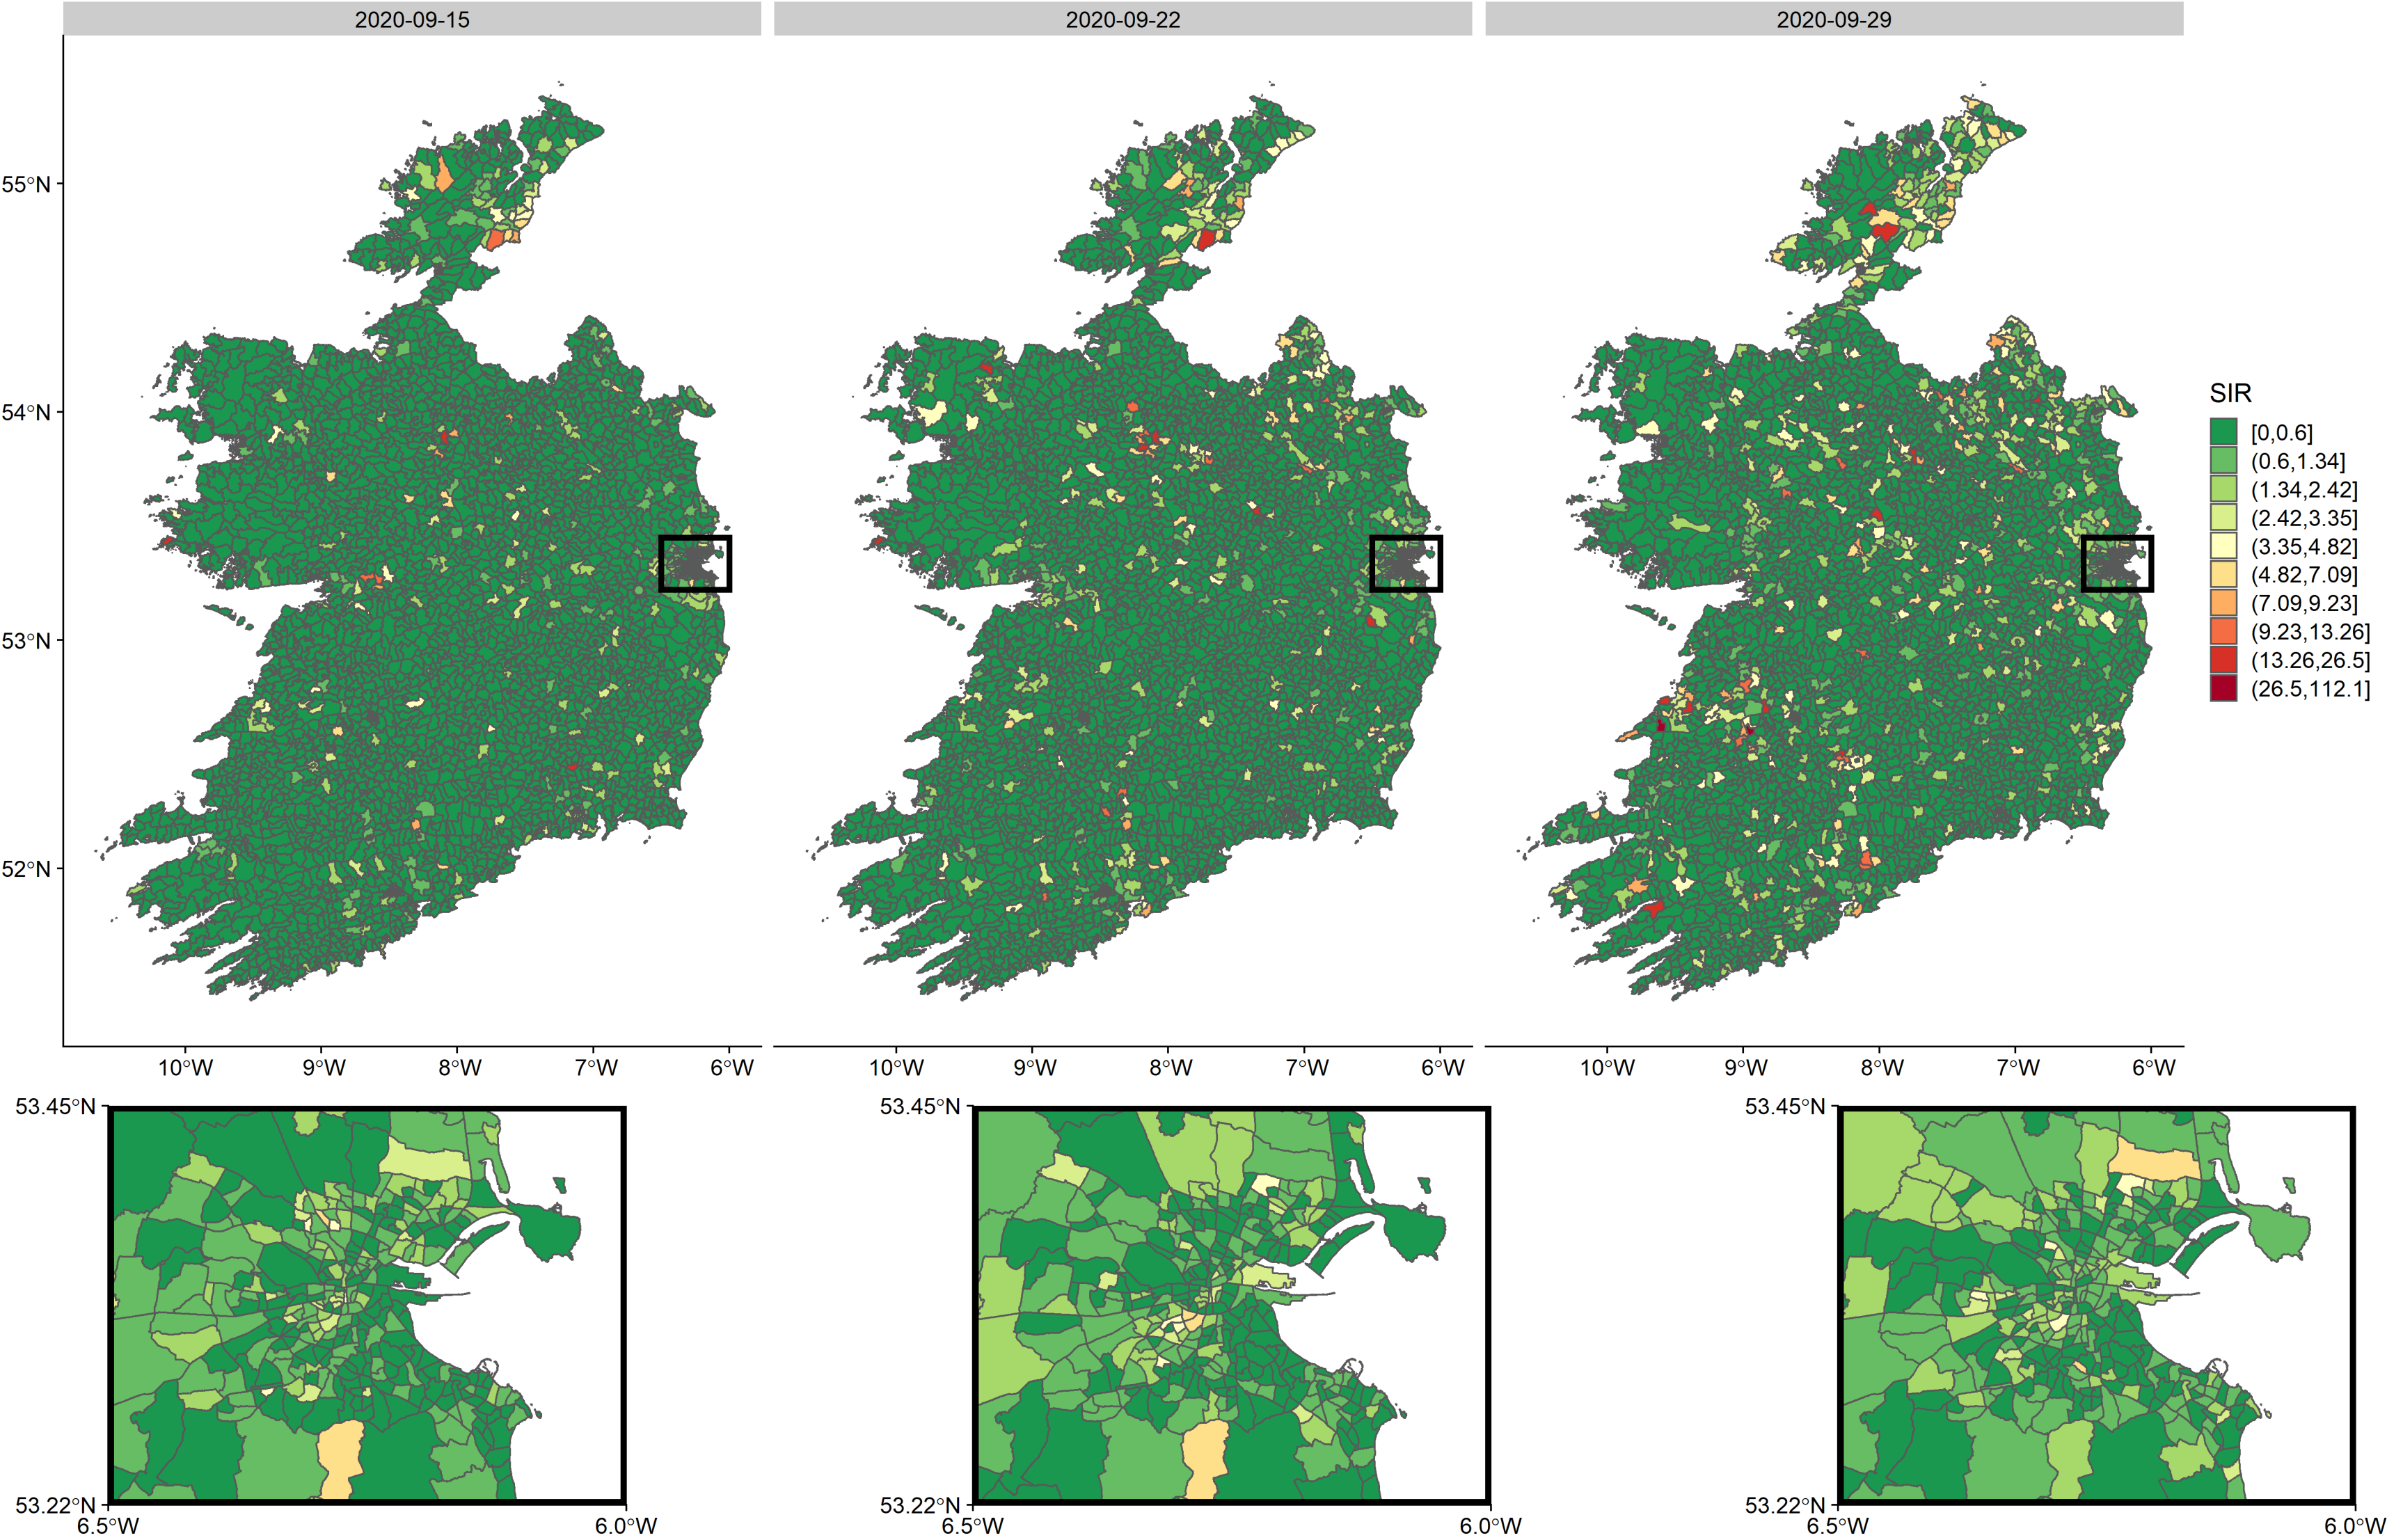

Crude Age & Sex Standardised Incidence Ratio's

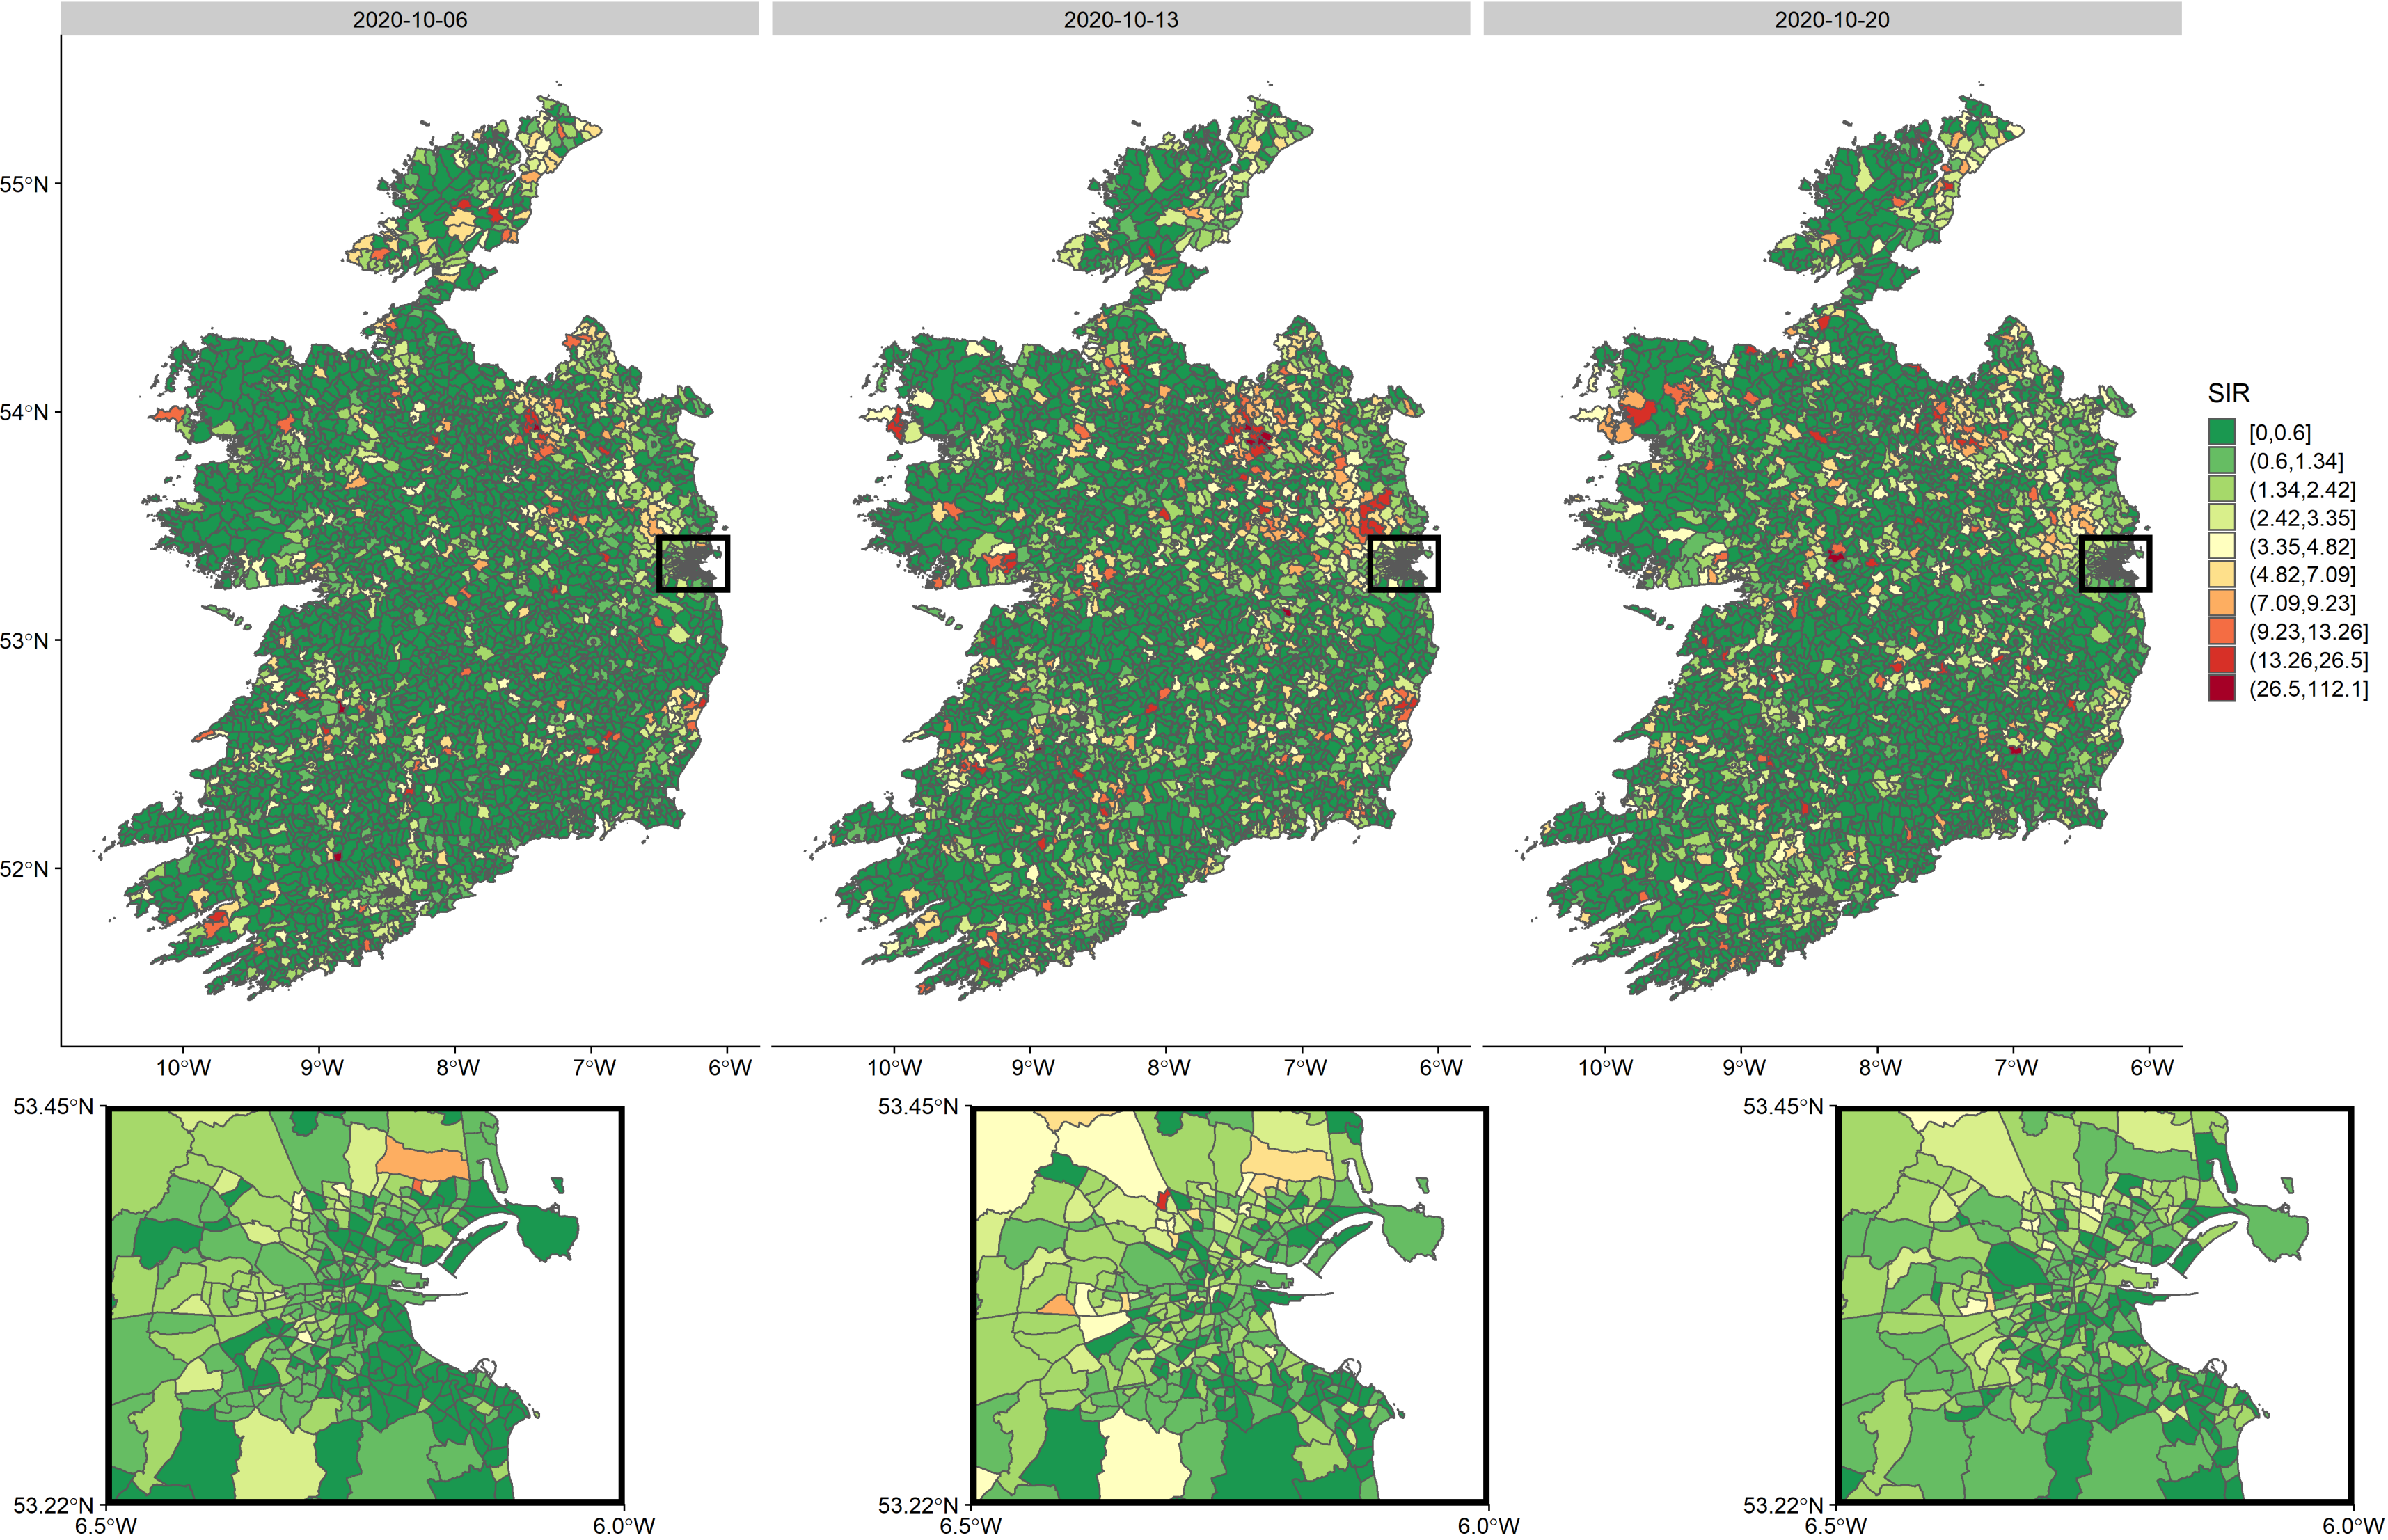

Crude Age & Sex Standardised Incidence Ratio's

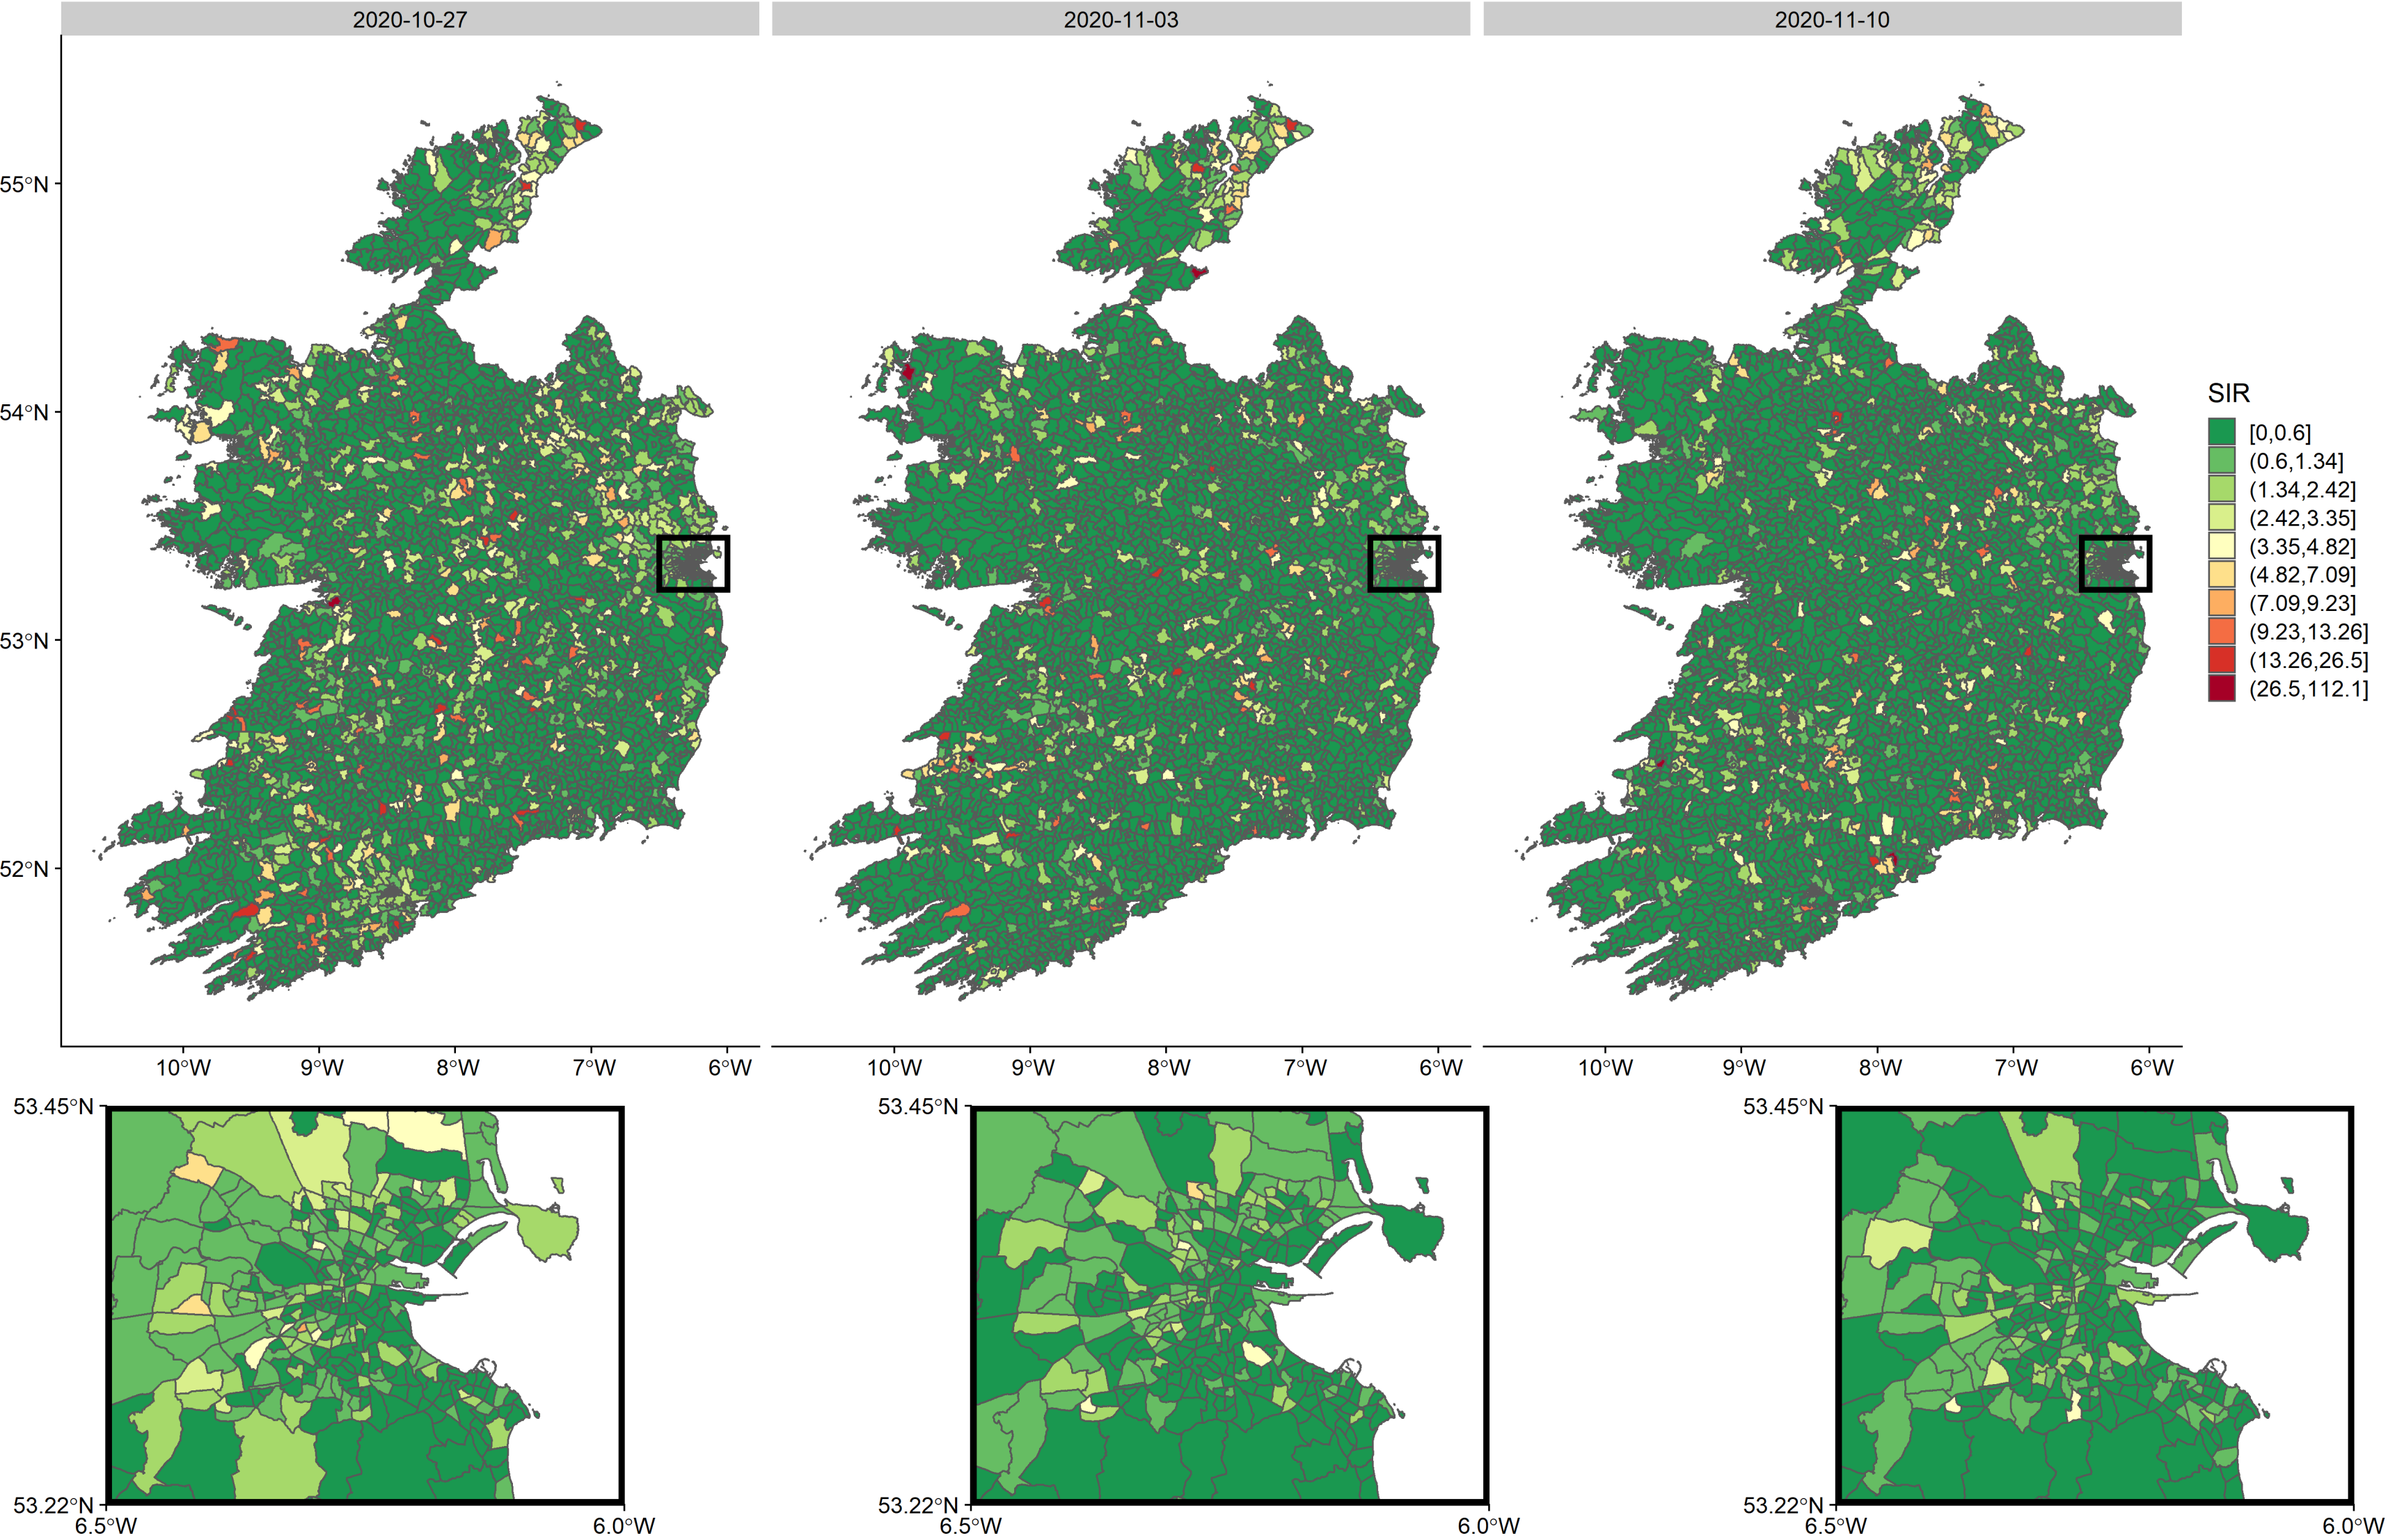

Crude Age & Sex Standardised Incidence Ratio's

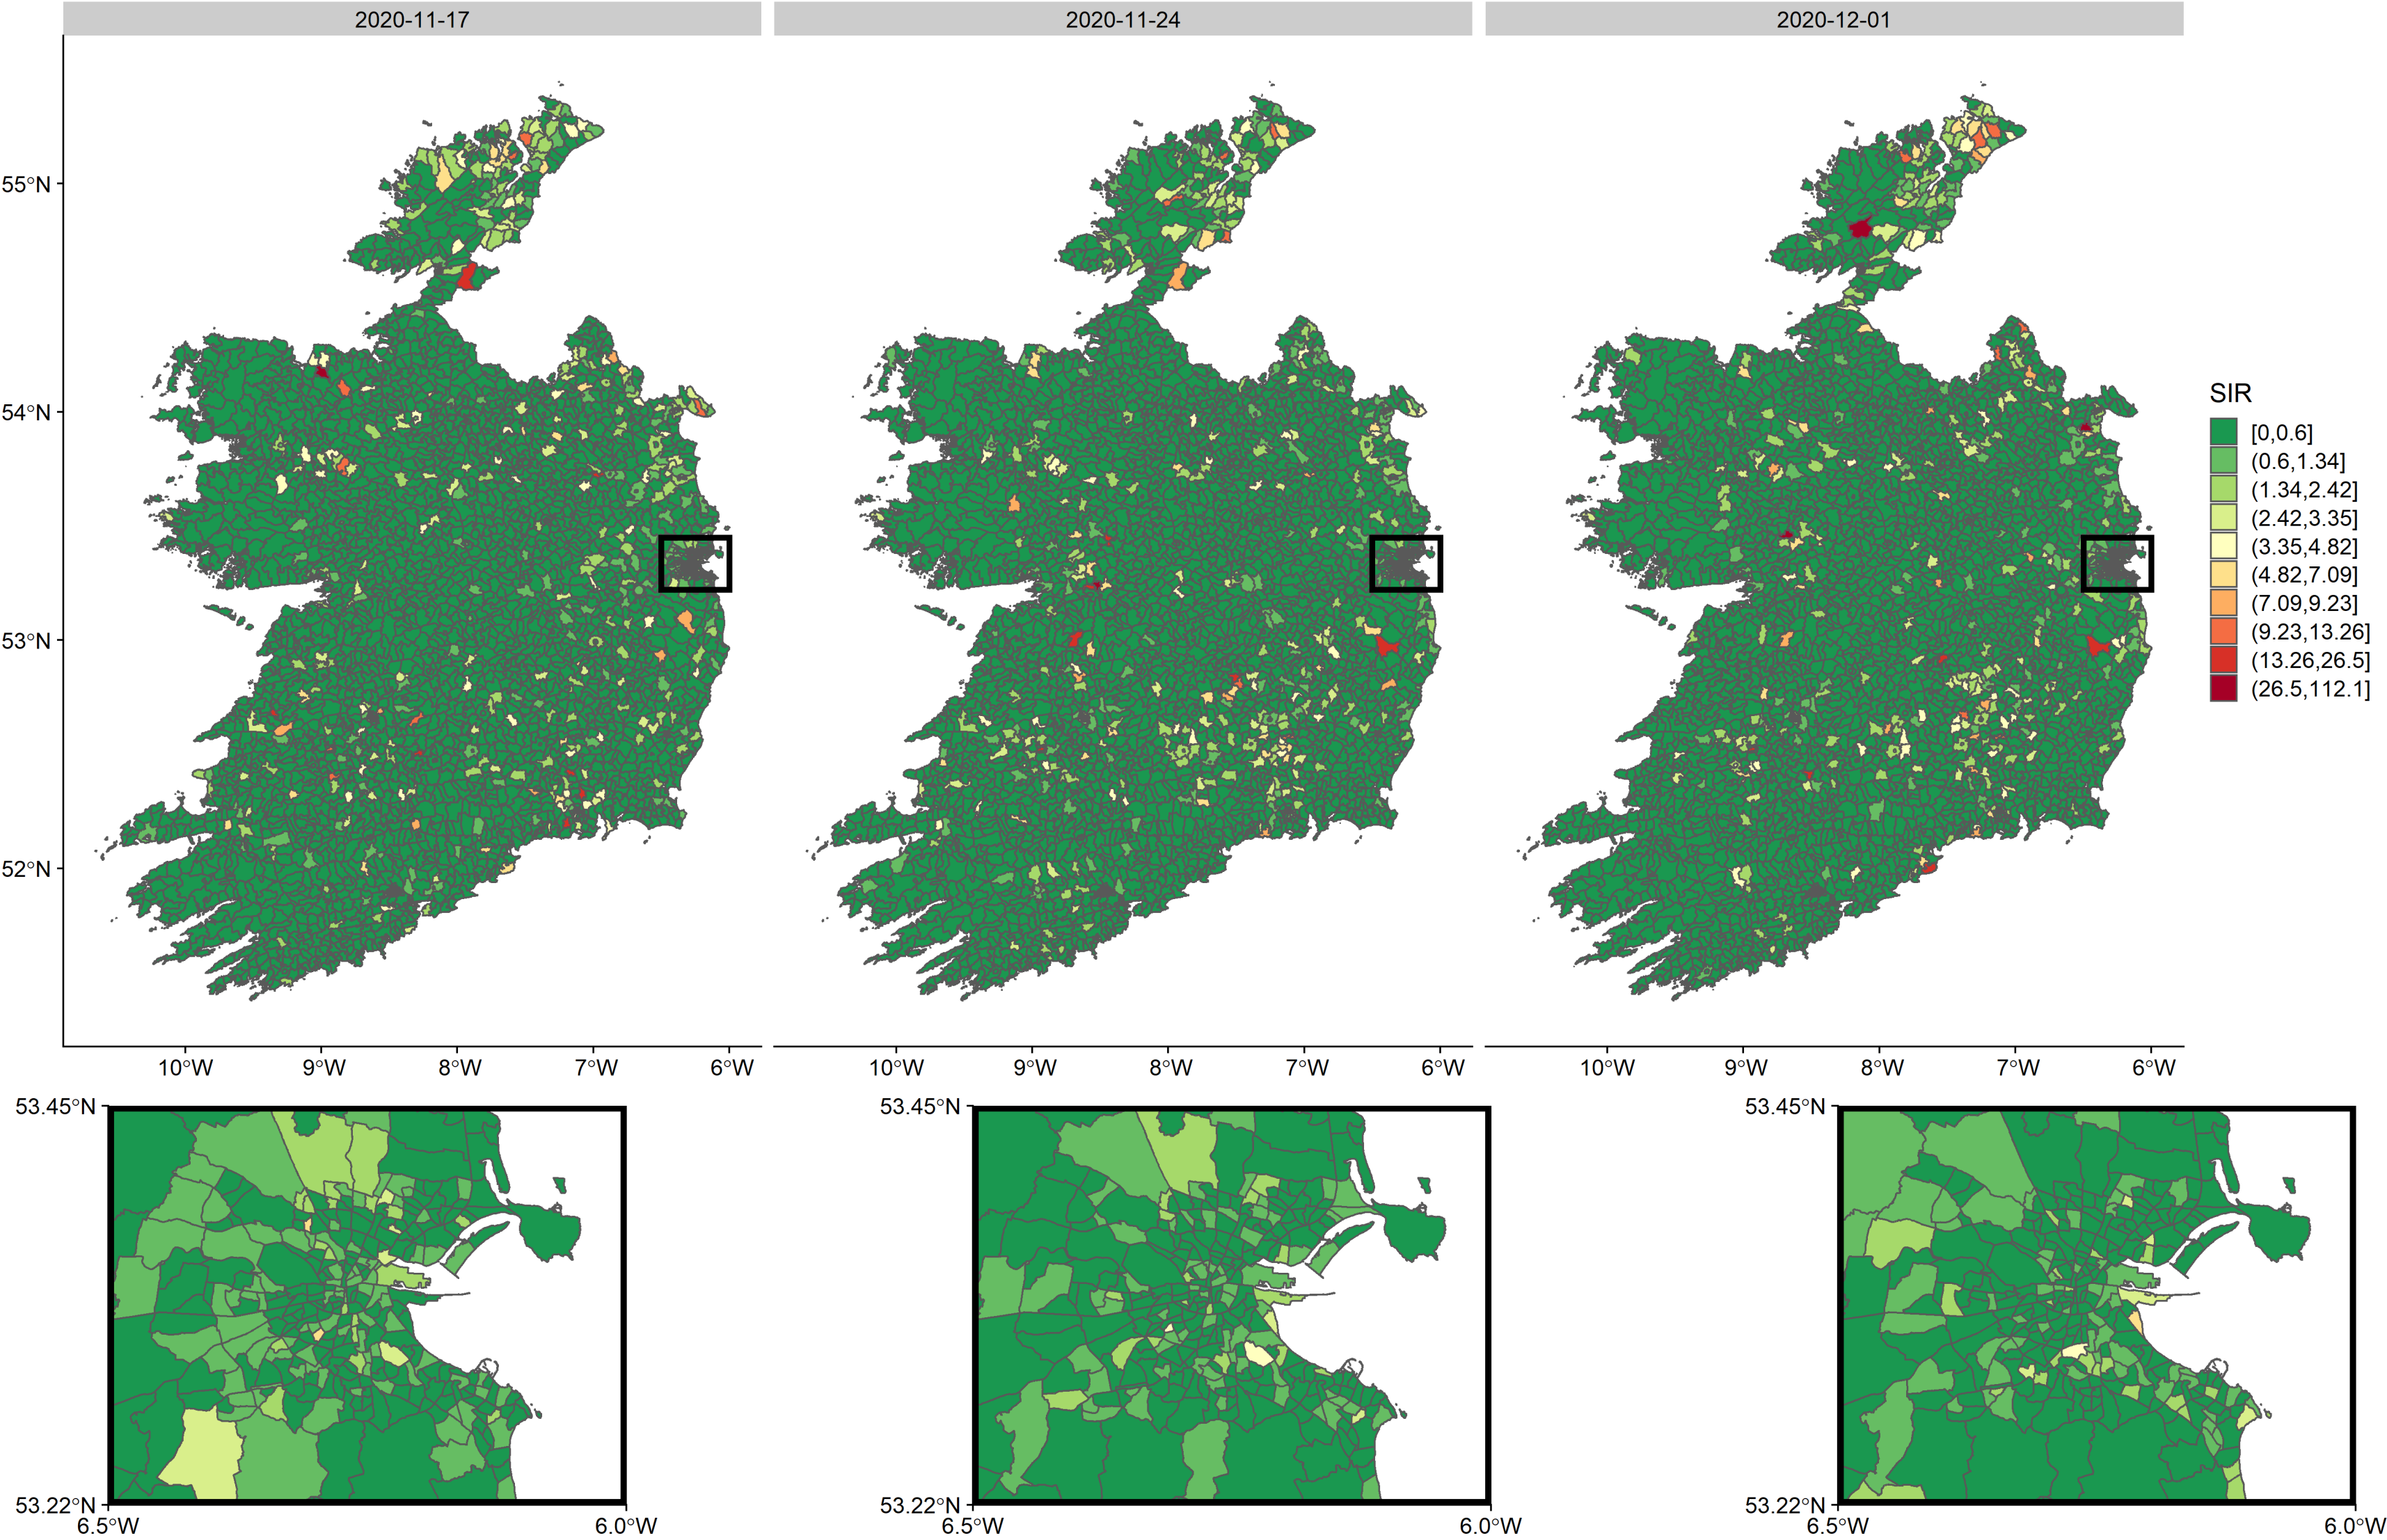

Crude Age & Sex Standardised Incidence Ratio's

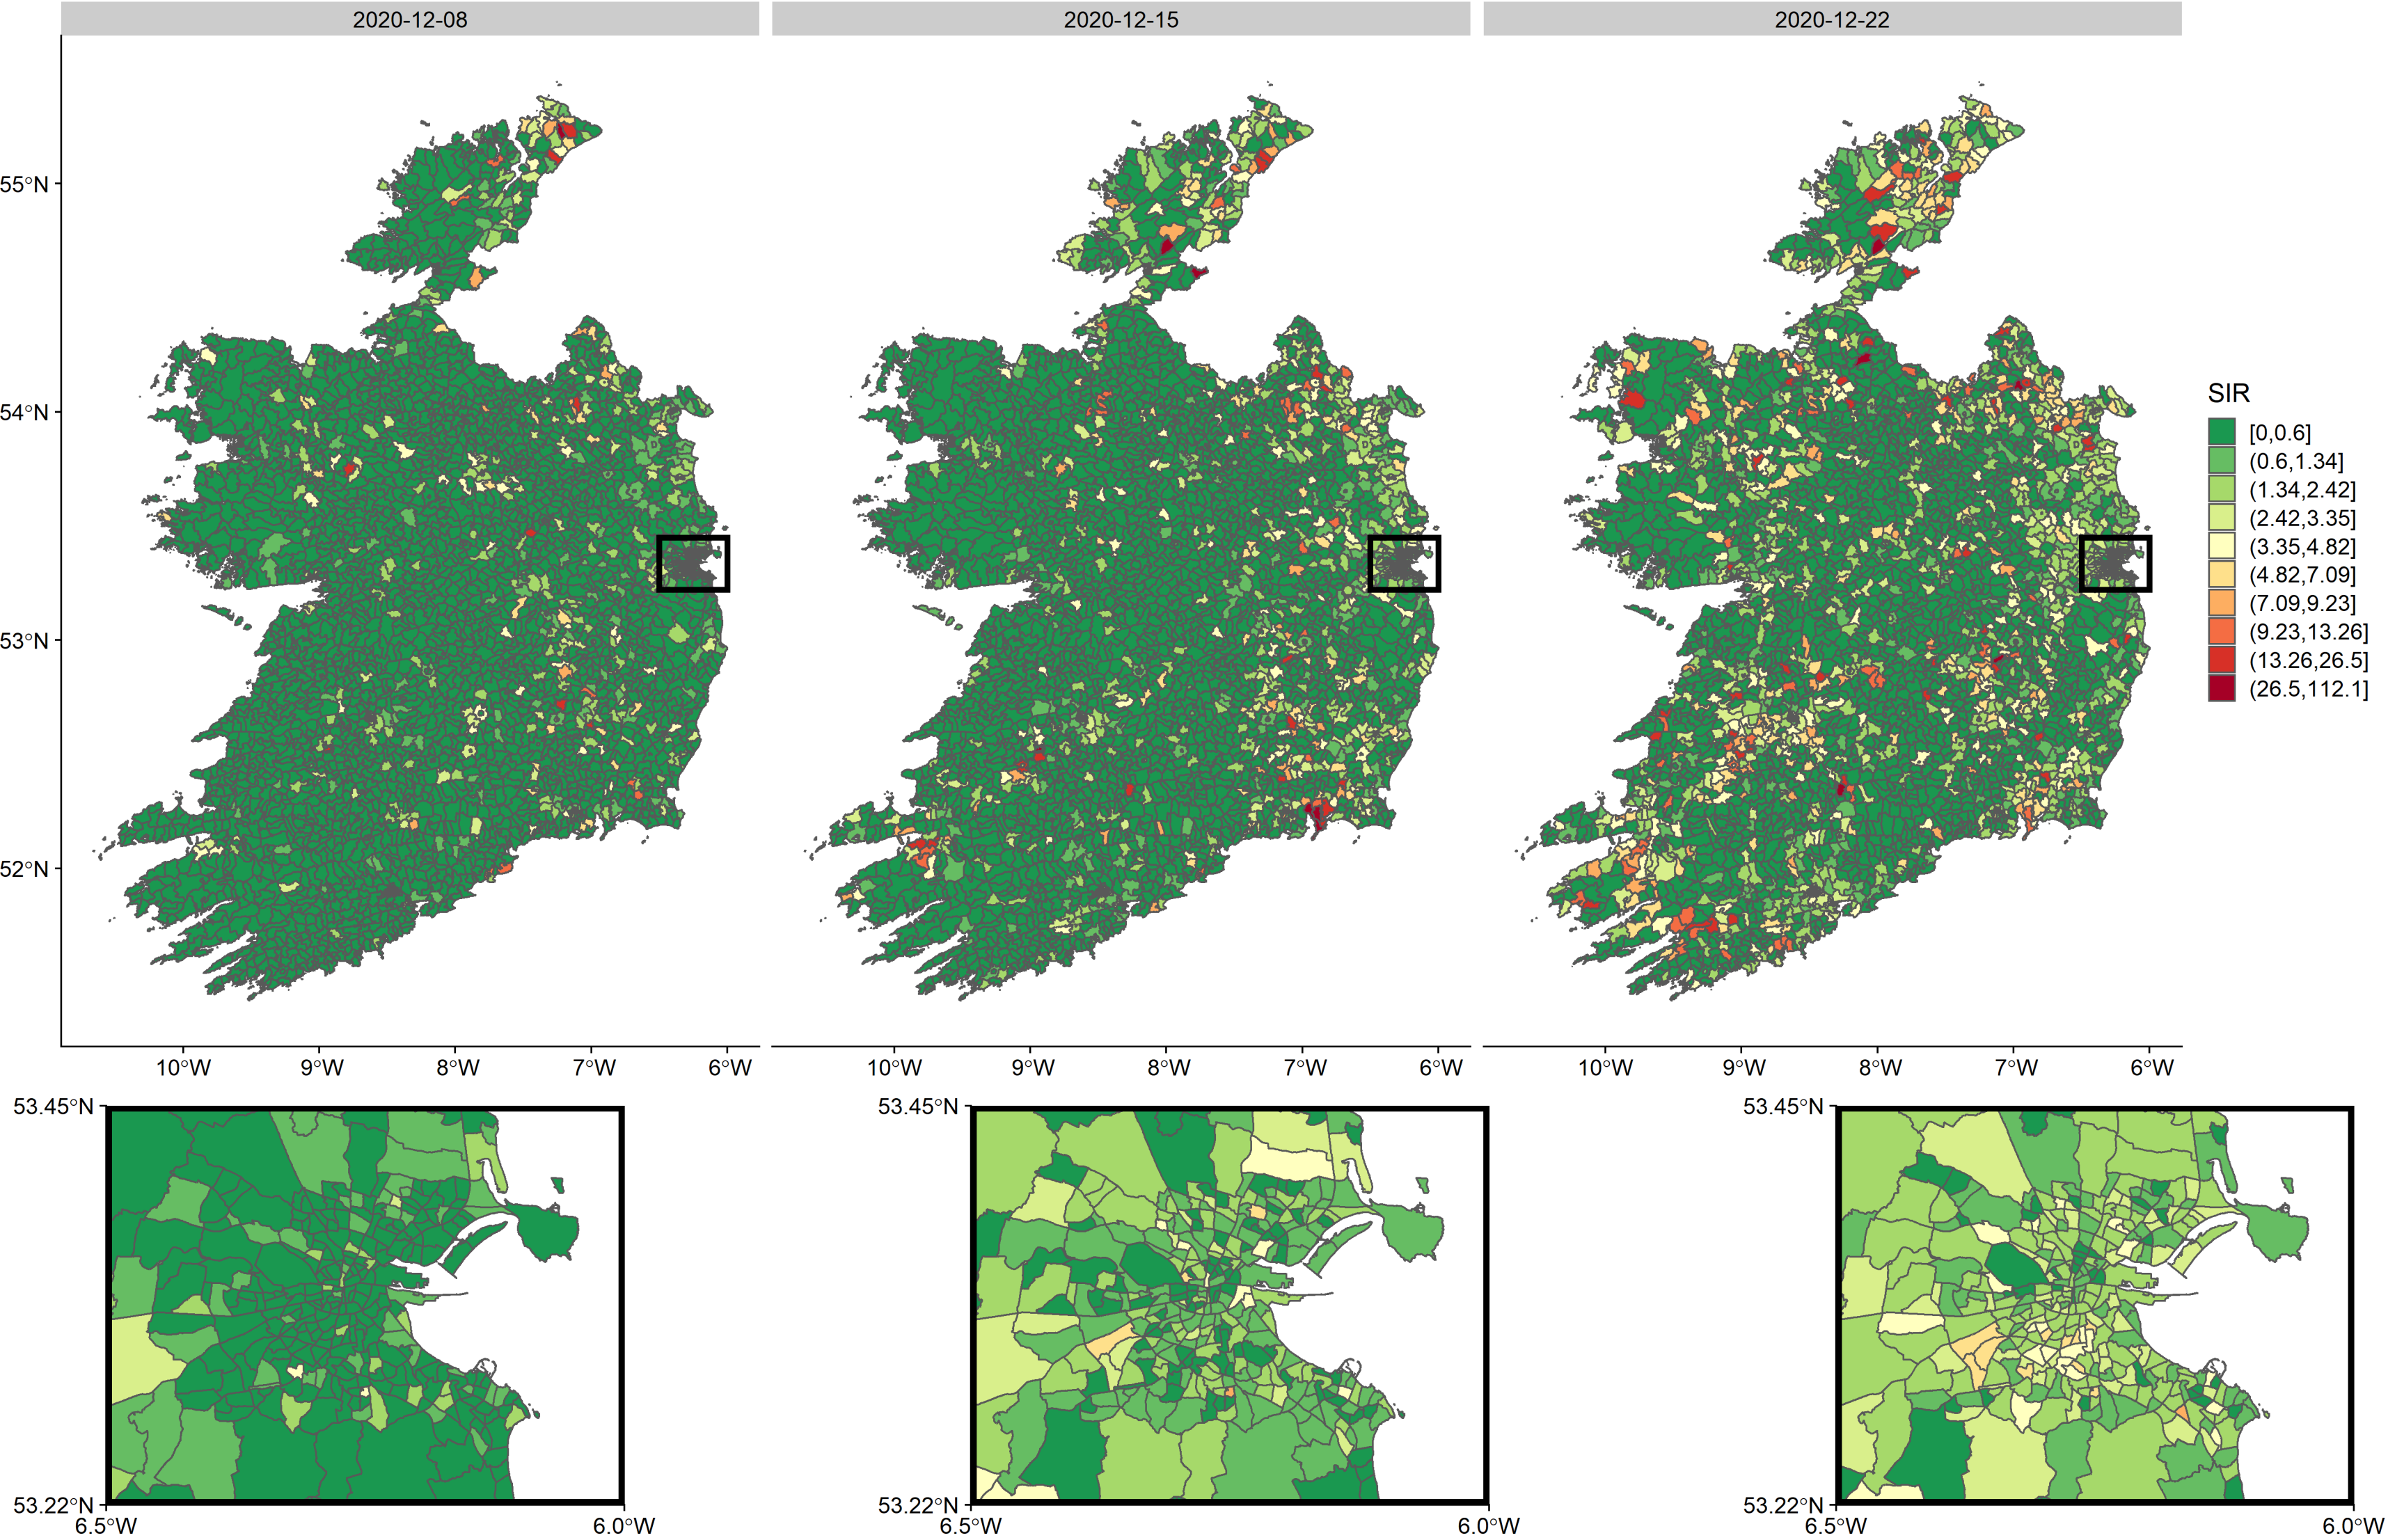

Crude Age & Sex Standardised Incidence Ratio's

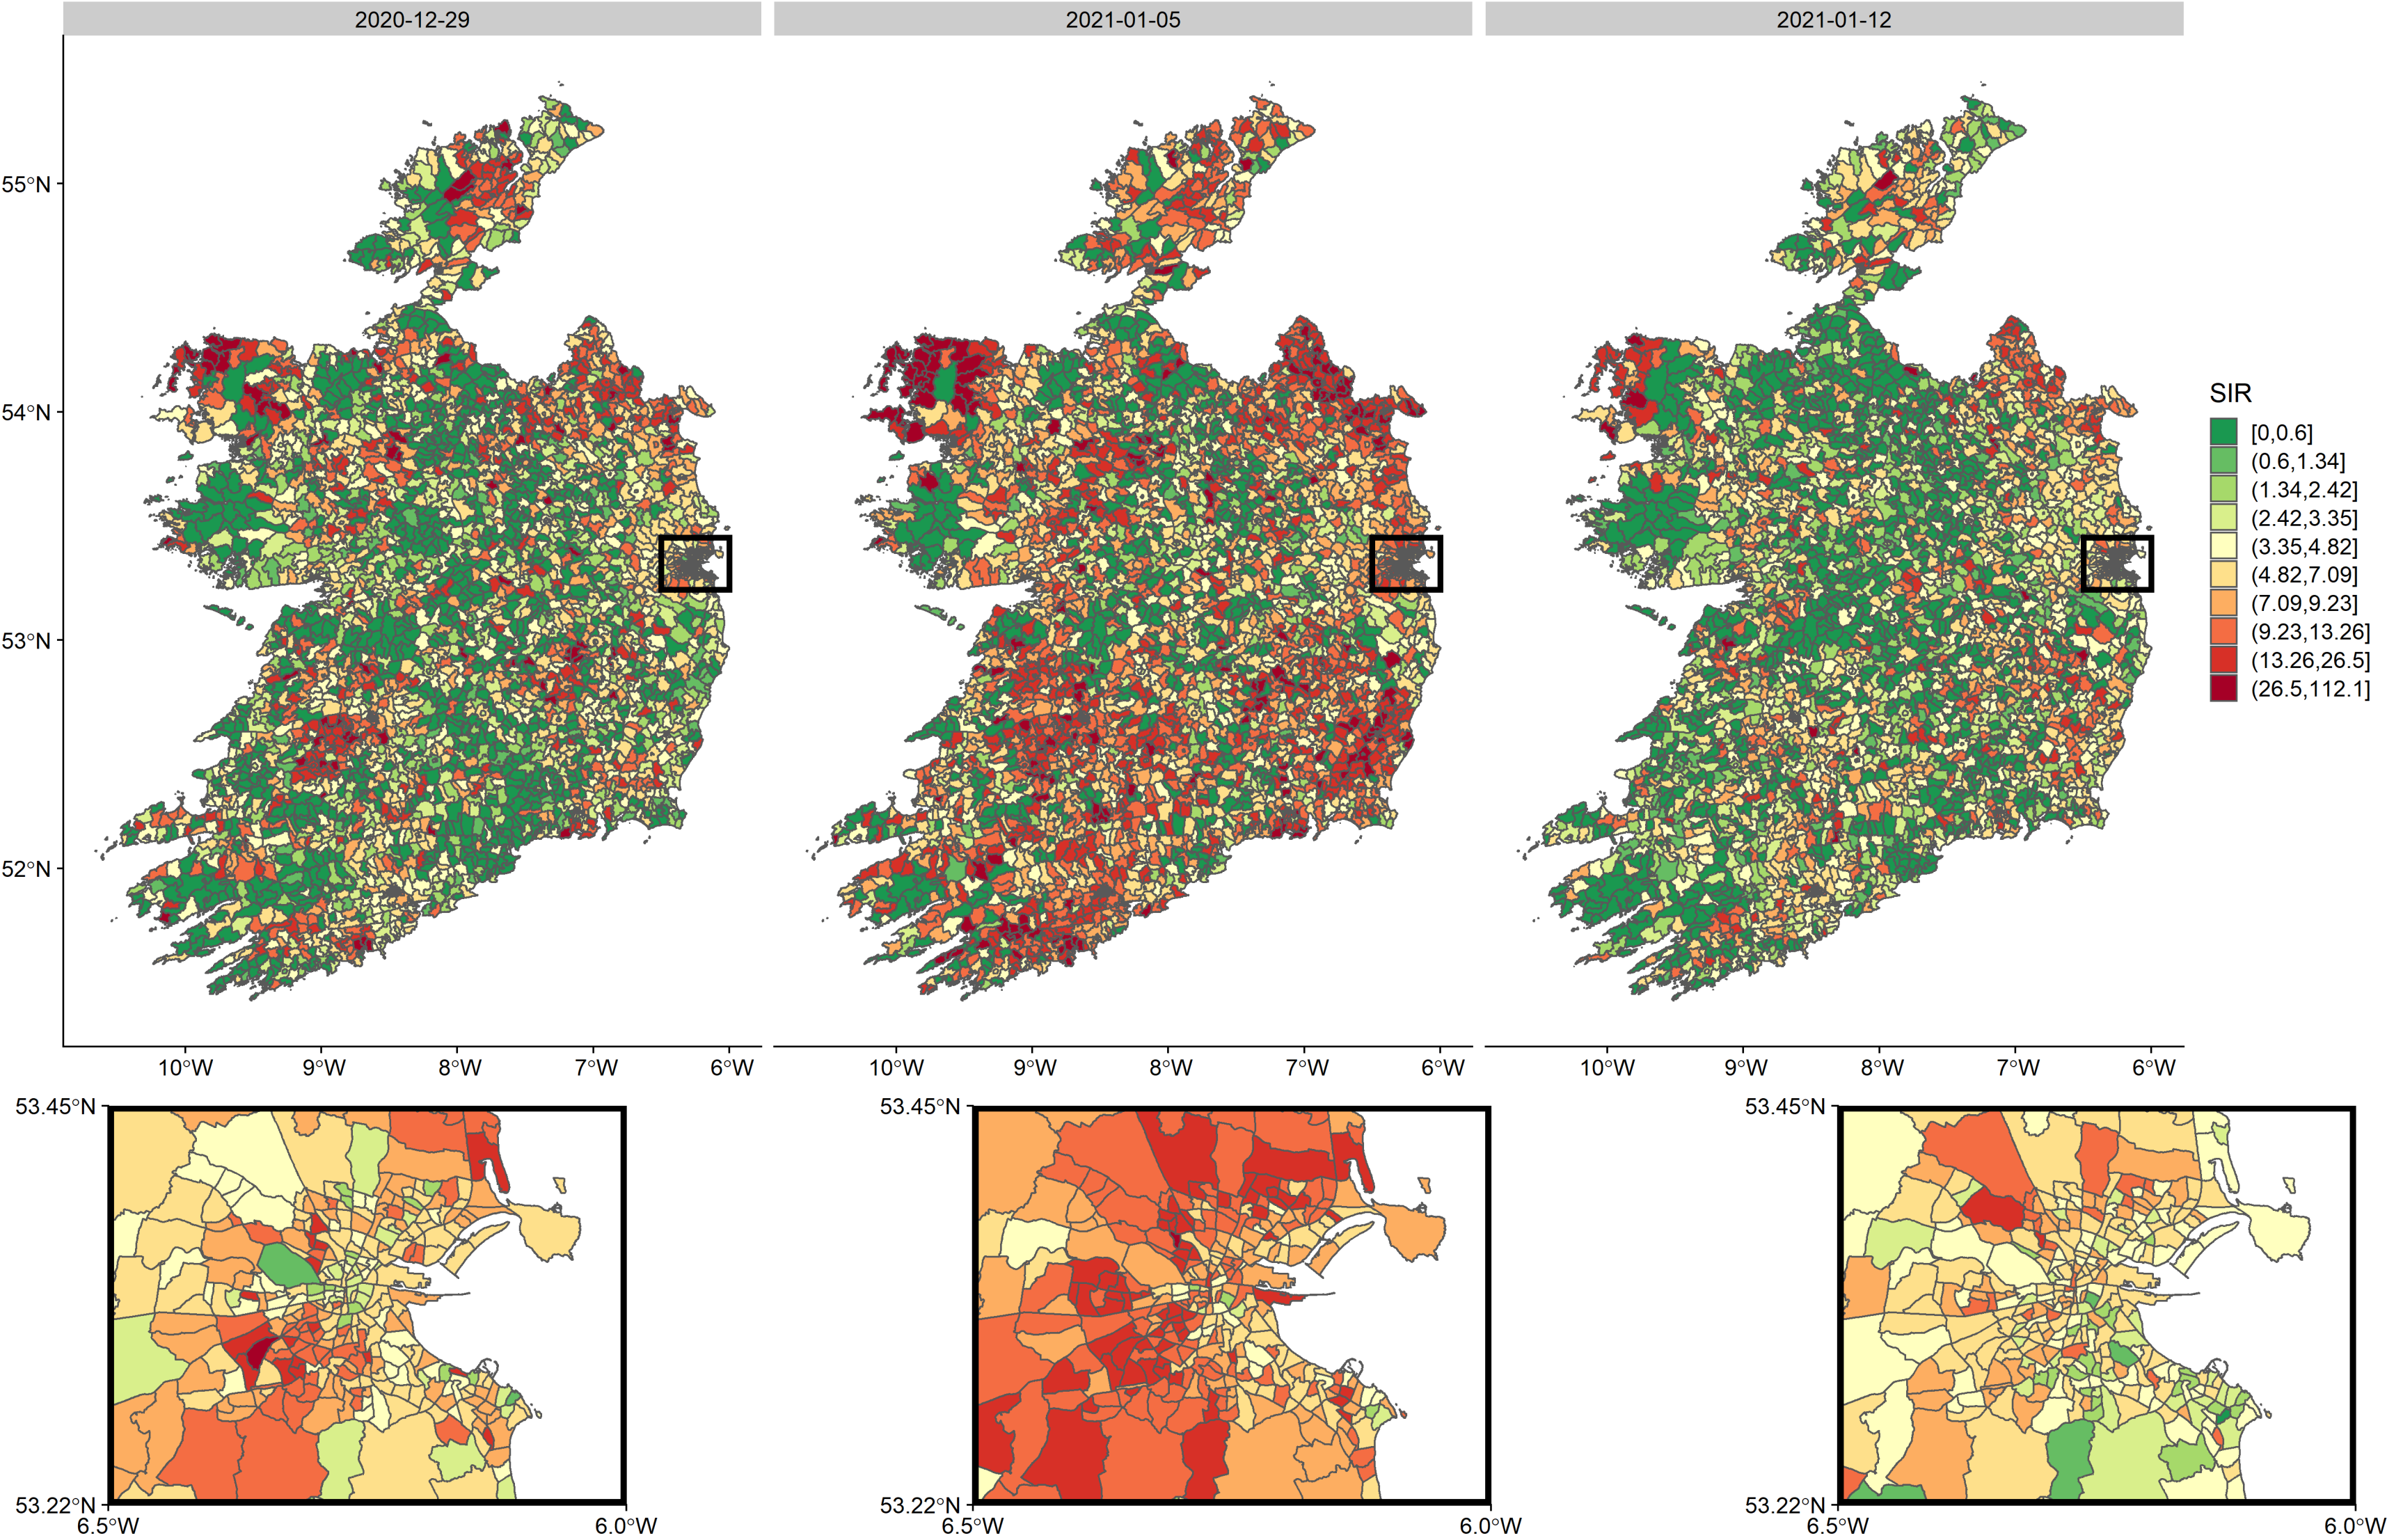

Crude Age & Sex Standardised Incidence Ratio's

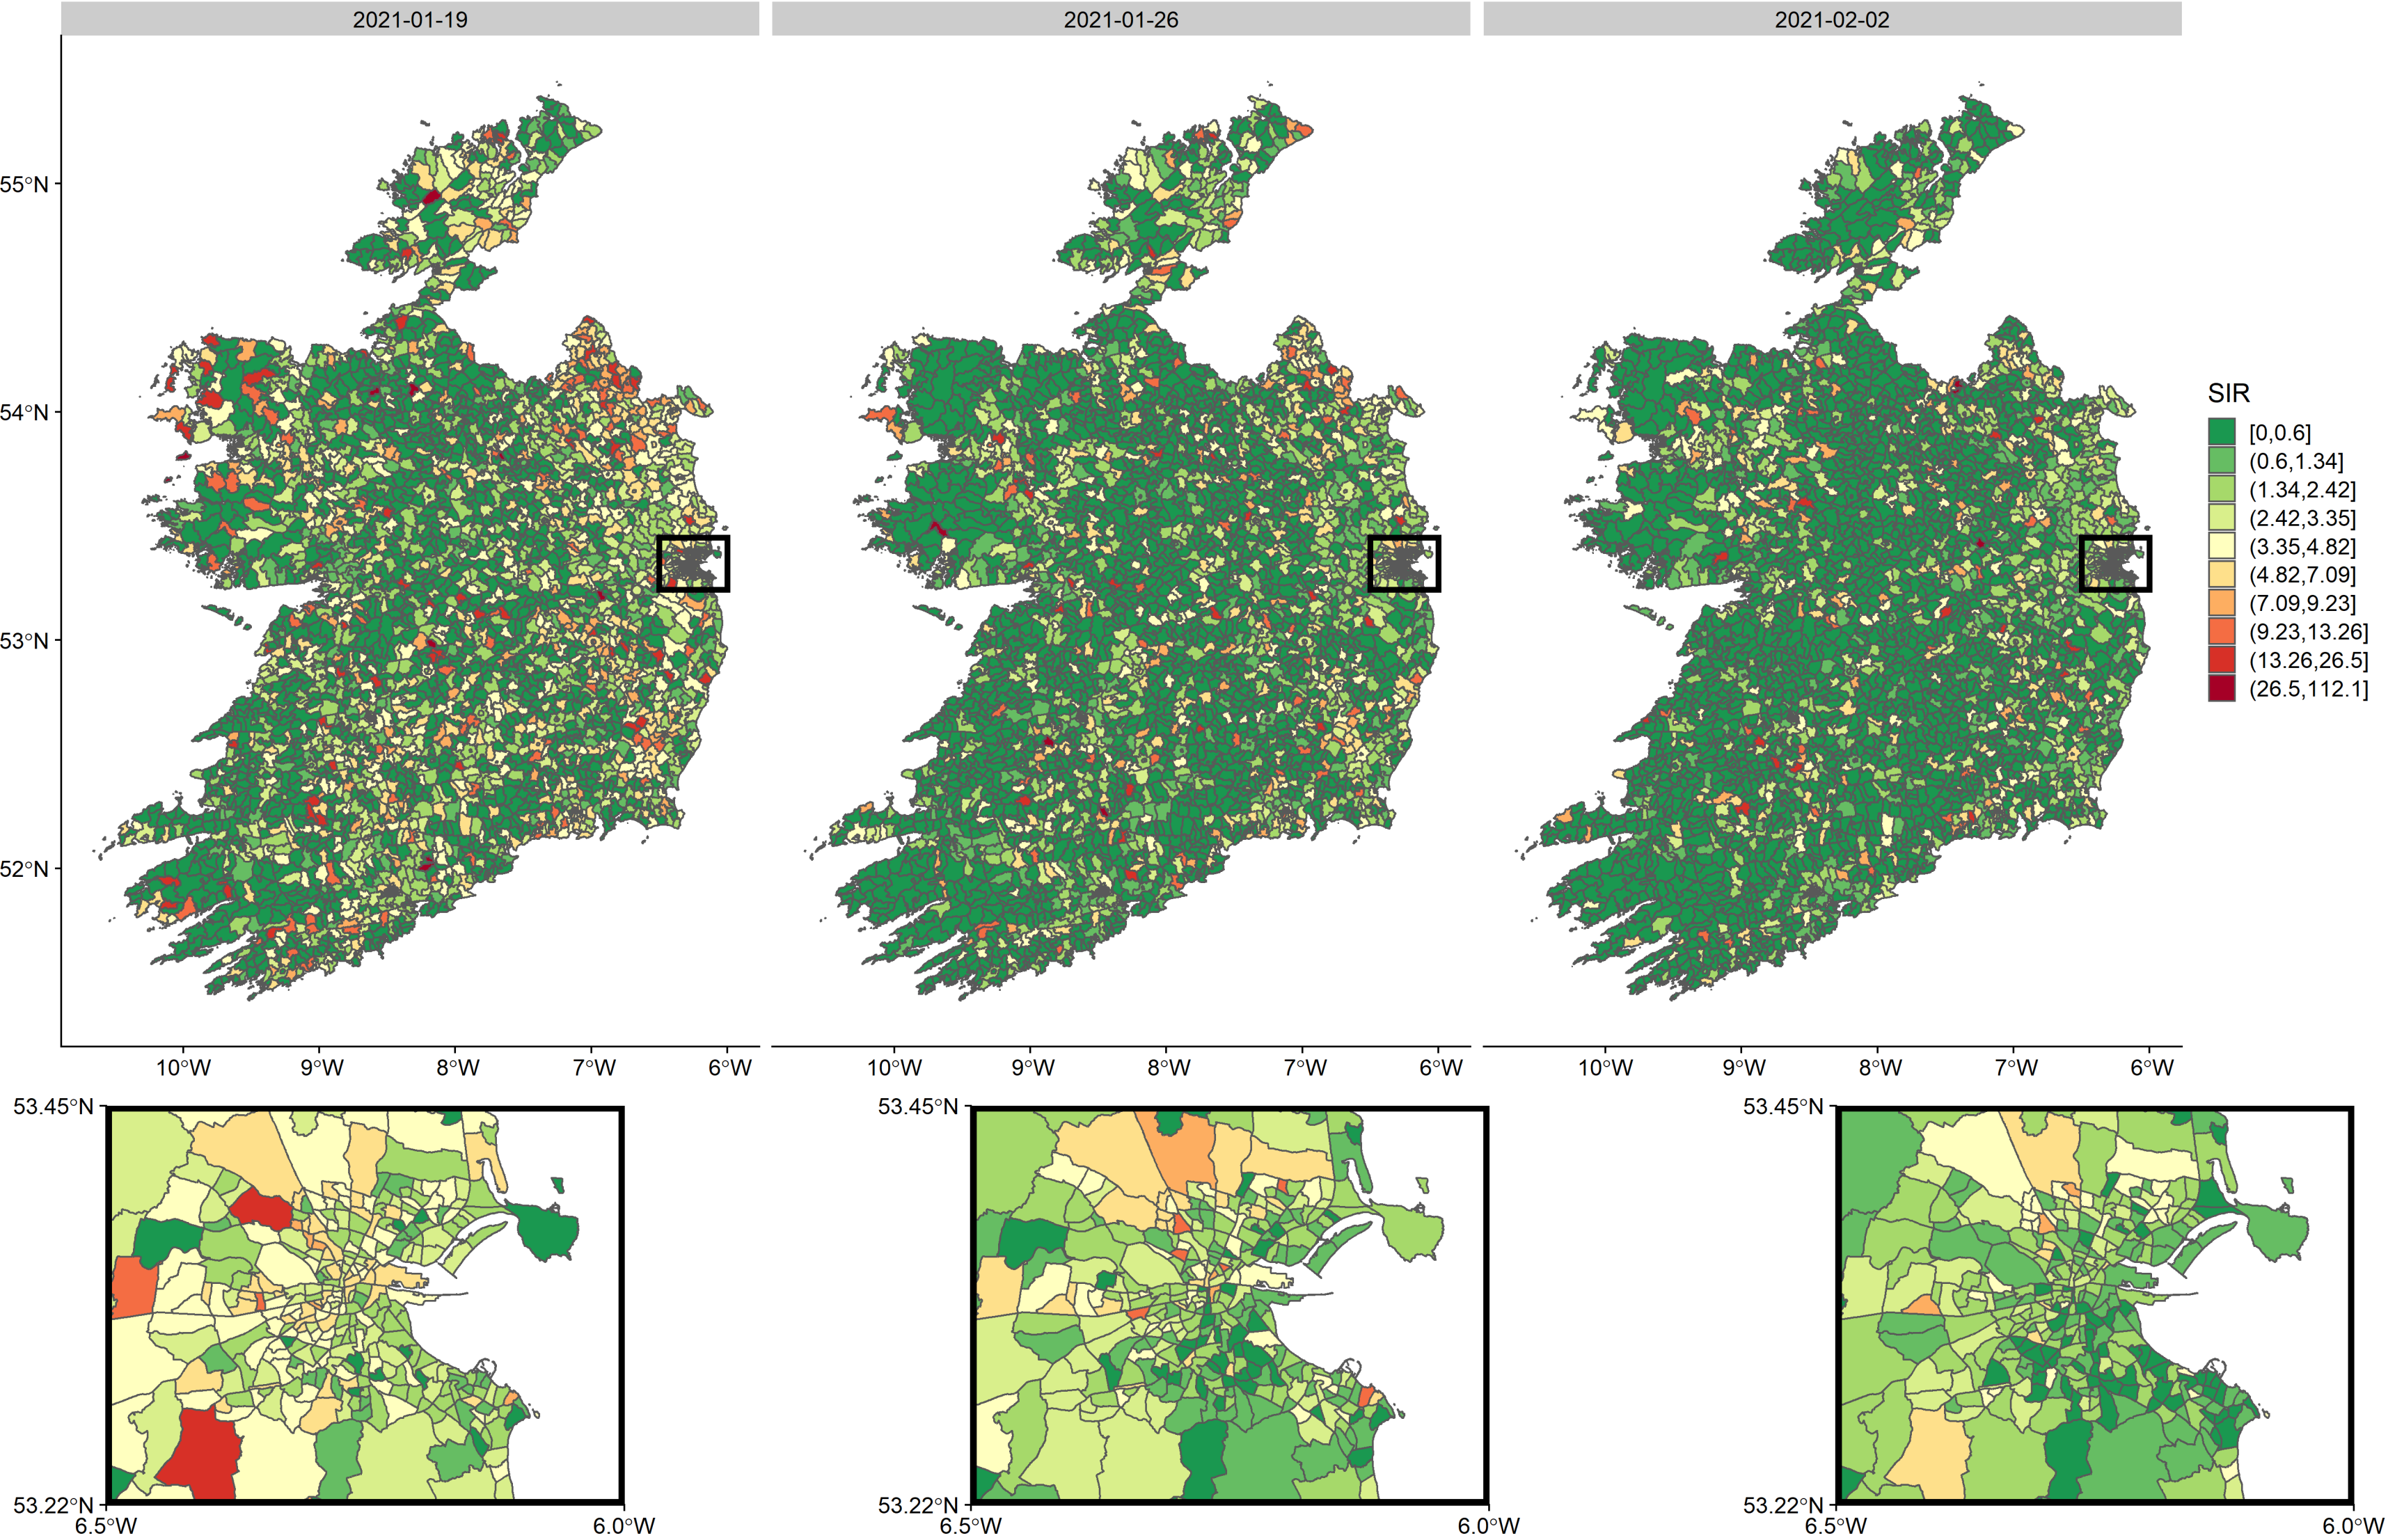

# Crude Age & Sex Standardised Incidence Ratio's

2021-02-09

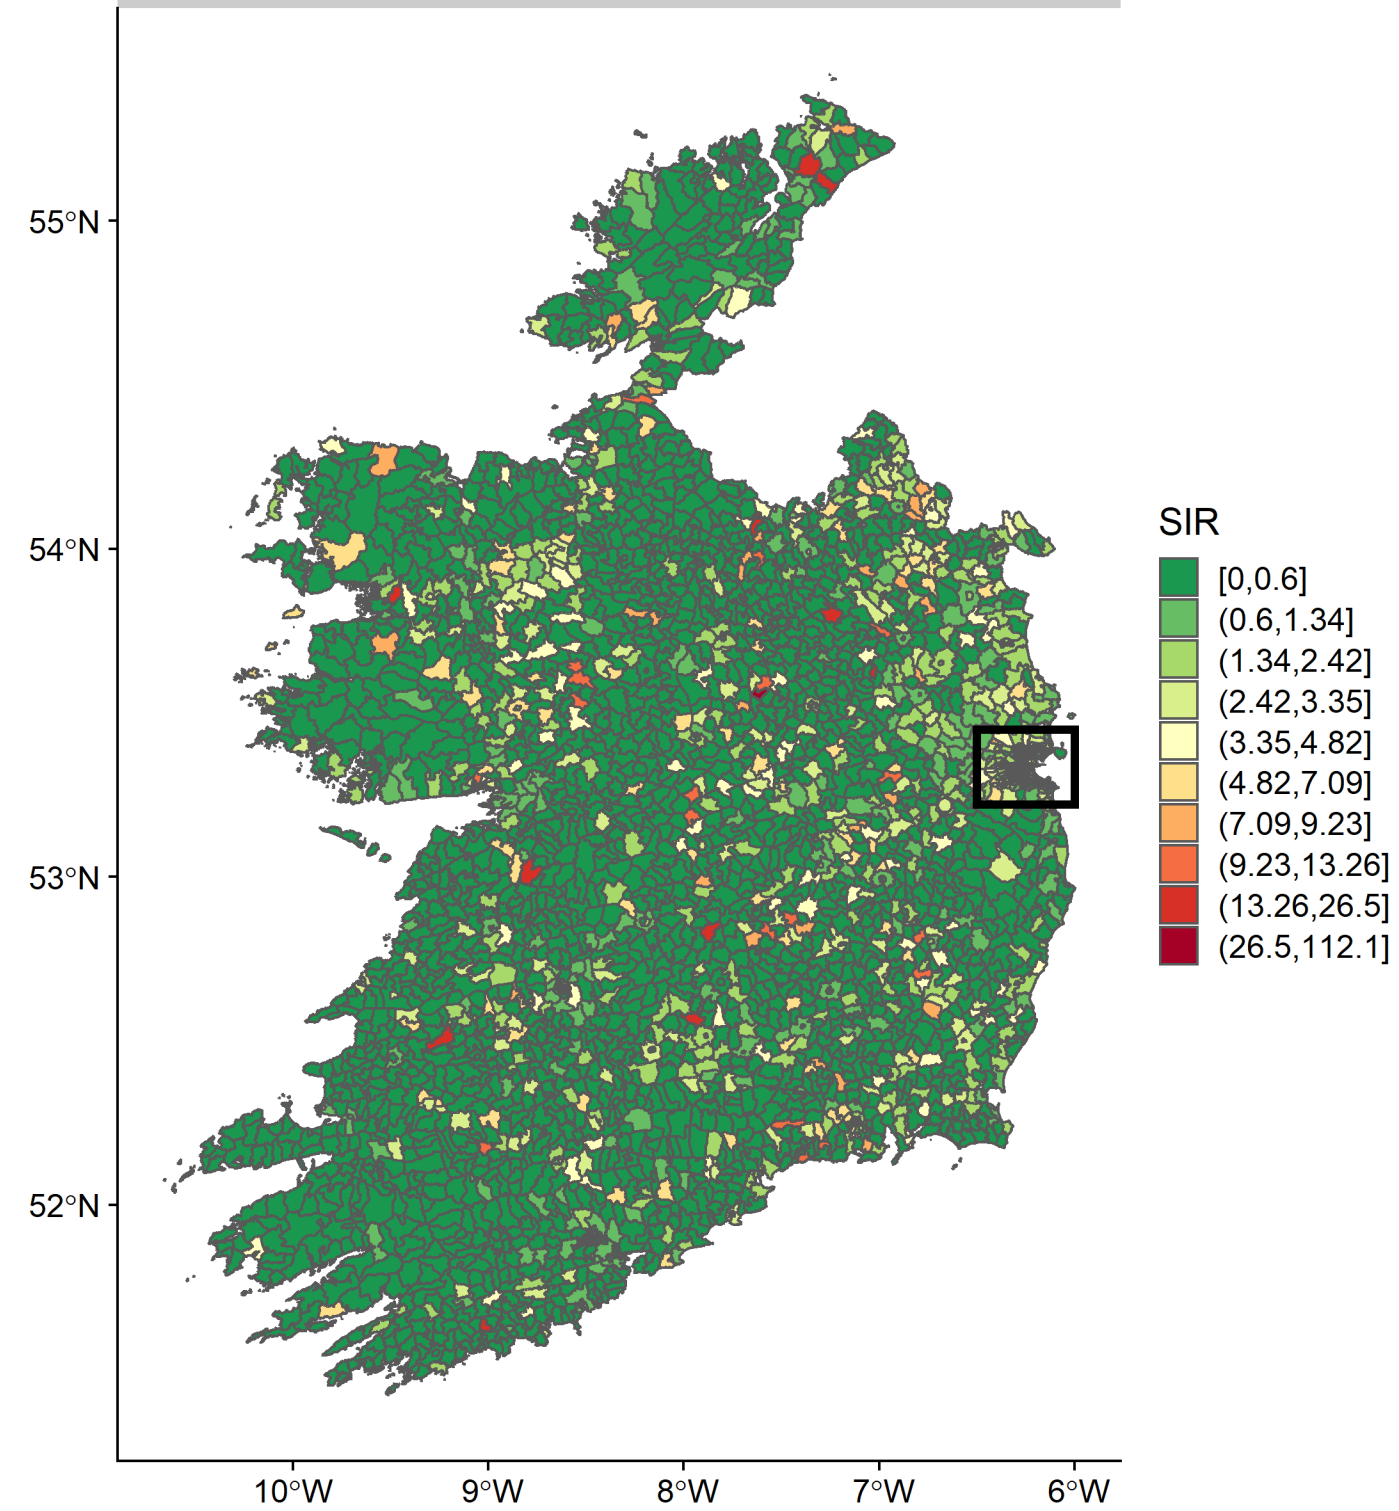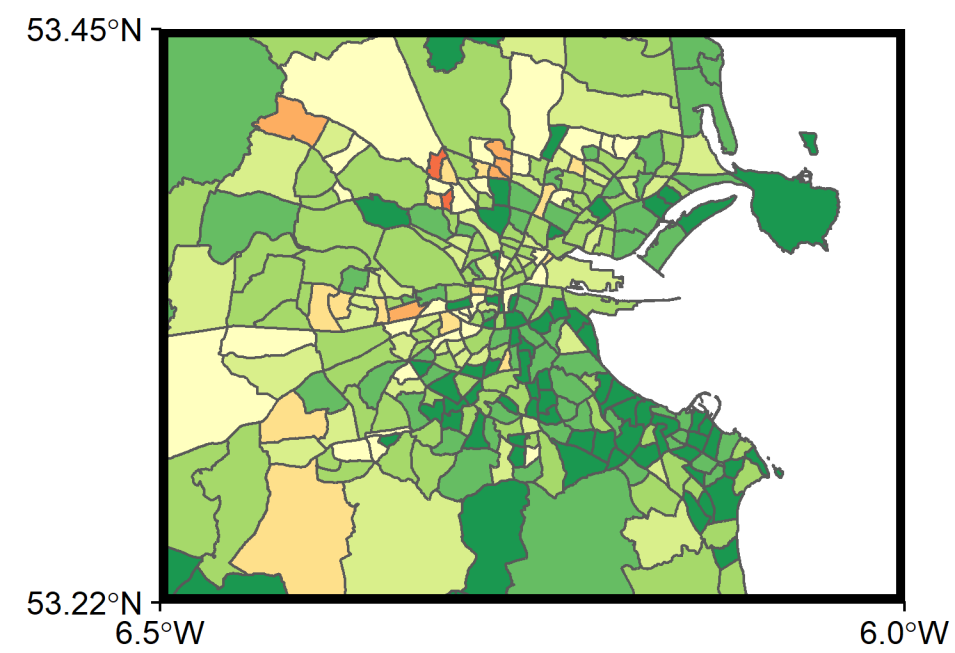

Supplement: Supplementary file 1 [file ijerph-18-06285-s001.zip › SM1_standardise_per_week_inset_04_Mar_2021.pdf]
