# Supplementary material for: Population Mobility Trends, Deprivation Index and the Spatio-Temporal Spread of Coronavirus Disease 2019 in Ireland
Source: Int J Environ Res Public Health. 2021 Jun 10;18(12):6285. doi: 10.3390/ijerph18126285 (PMC8296107; doi:10.3390/ijerph18126285)

**Carlow**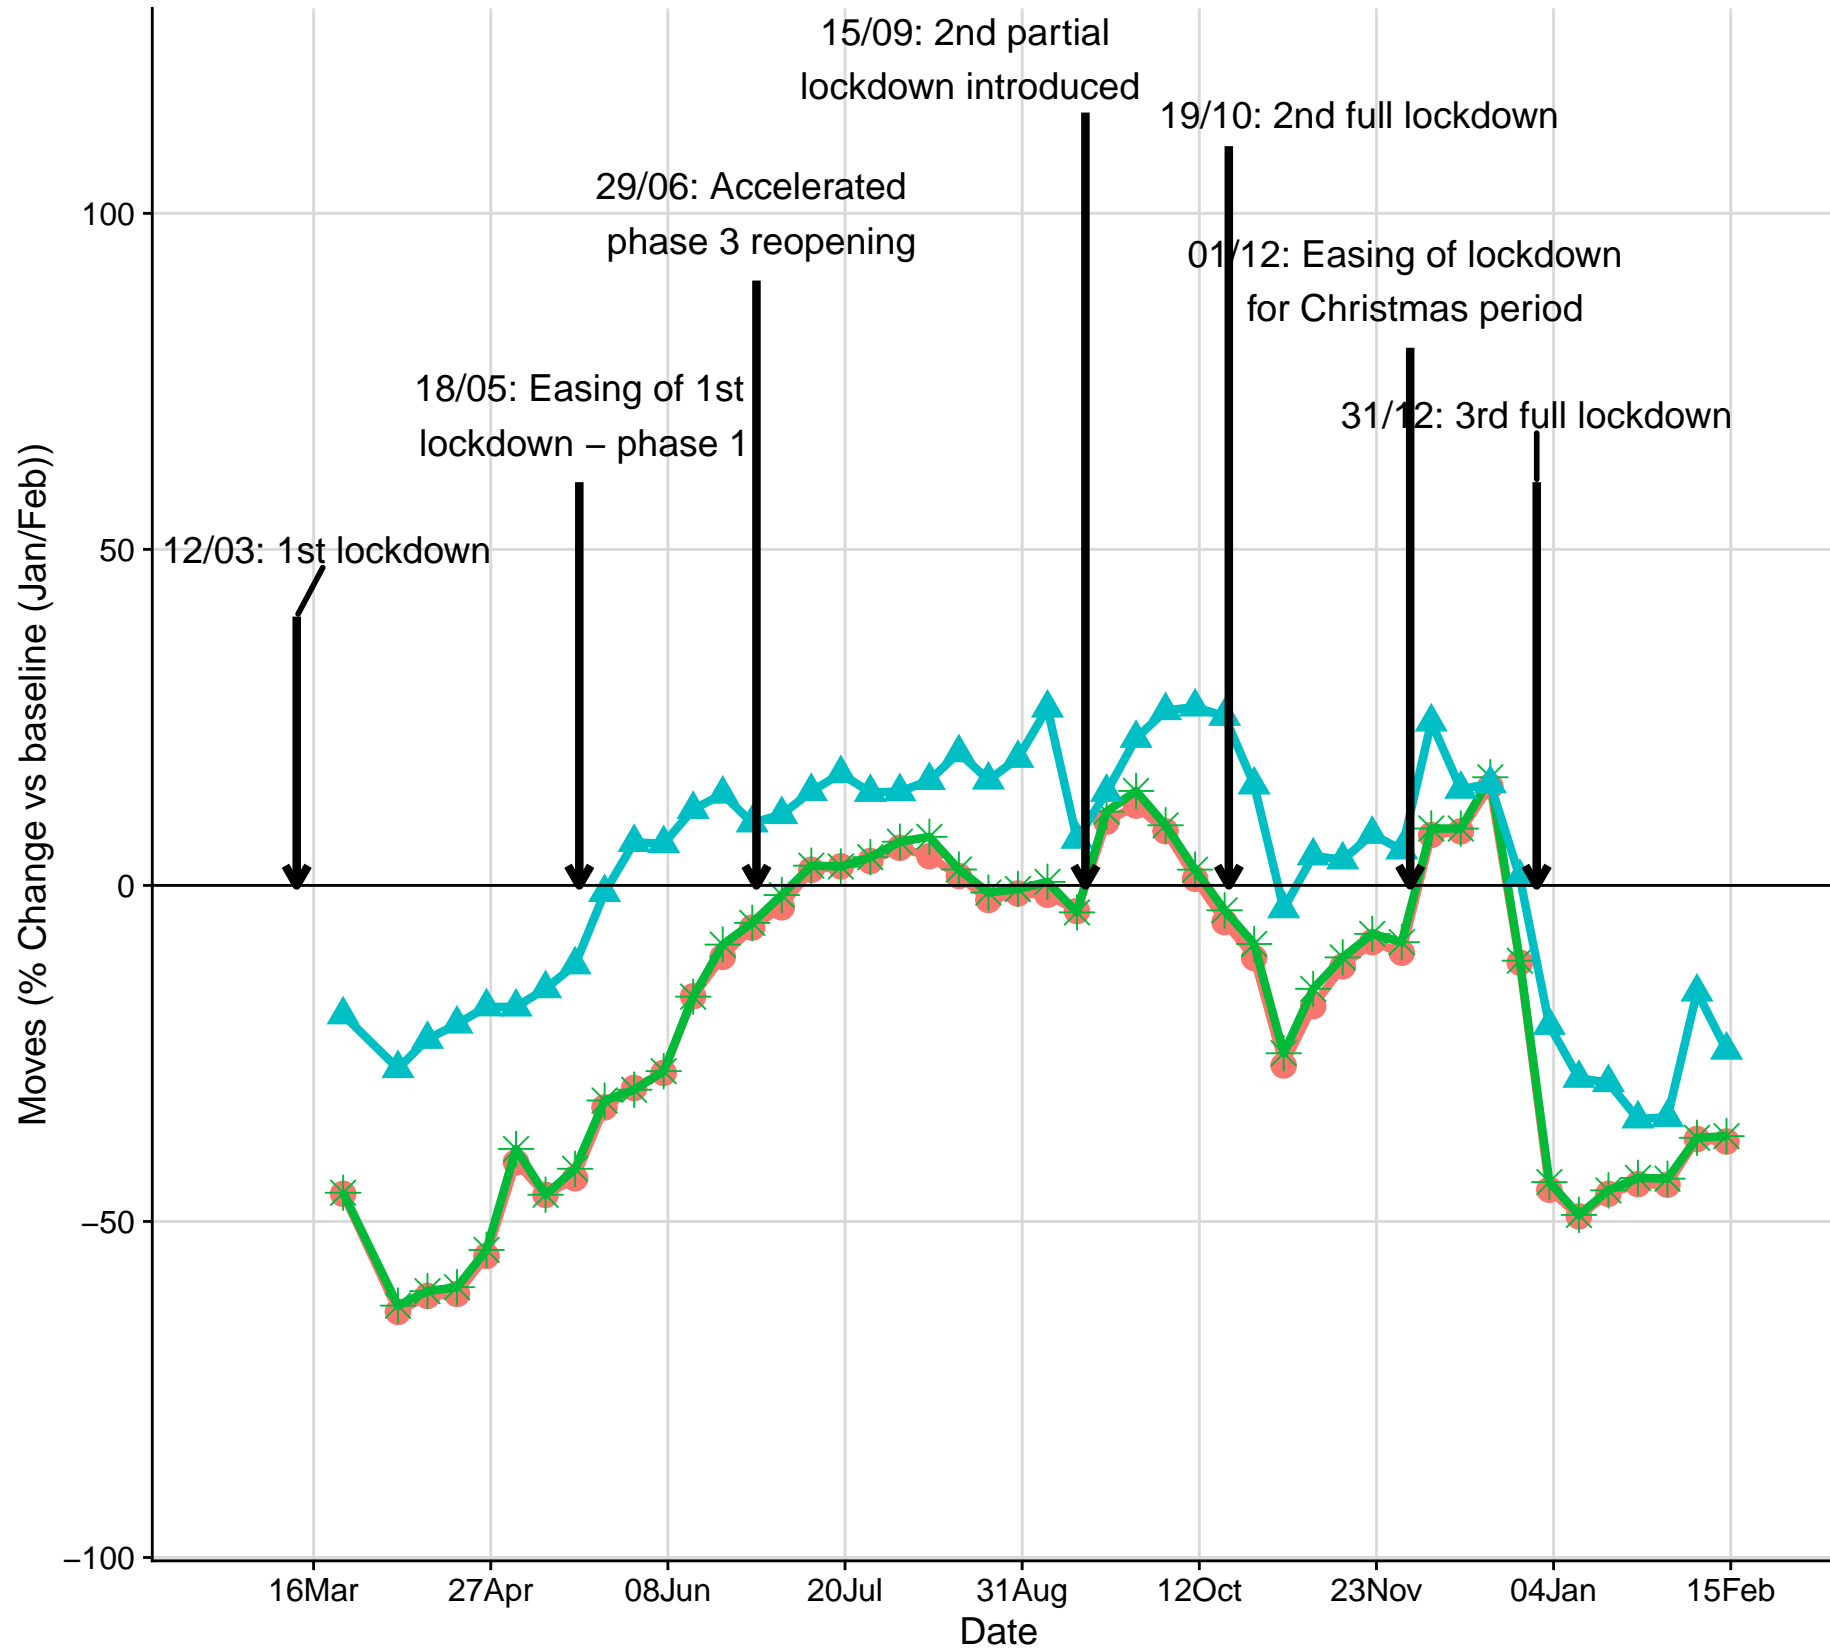**Cavan**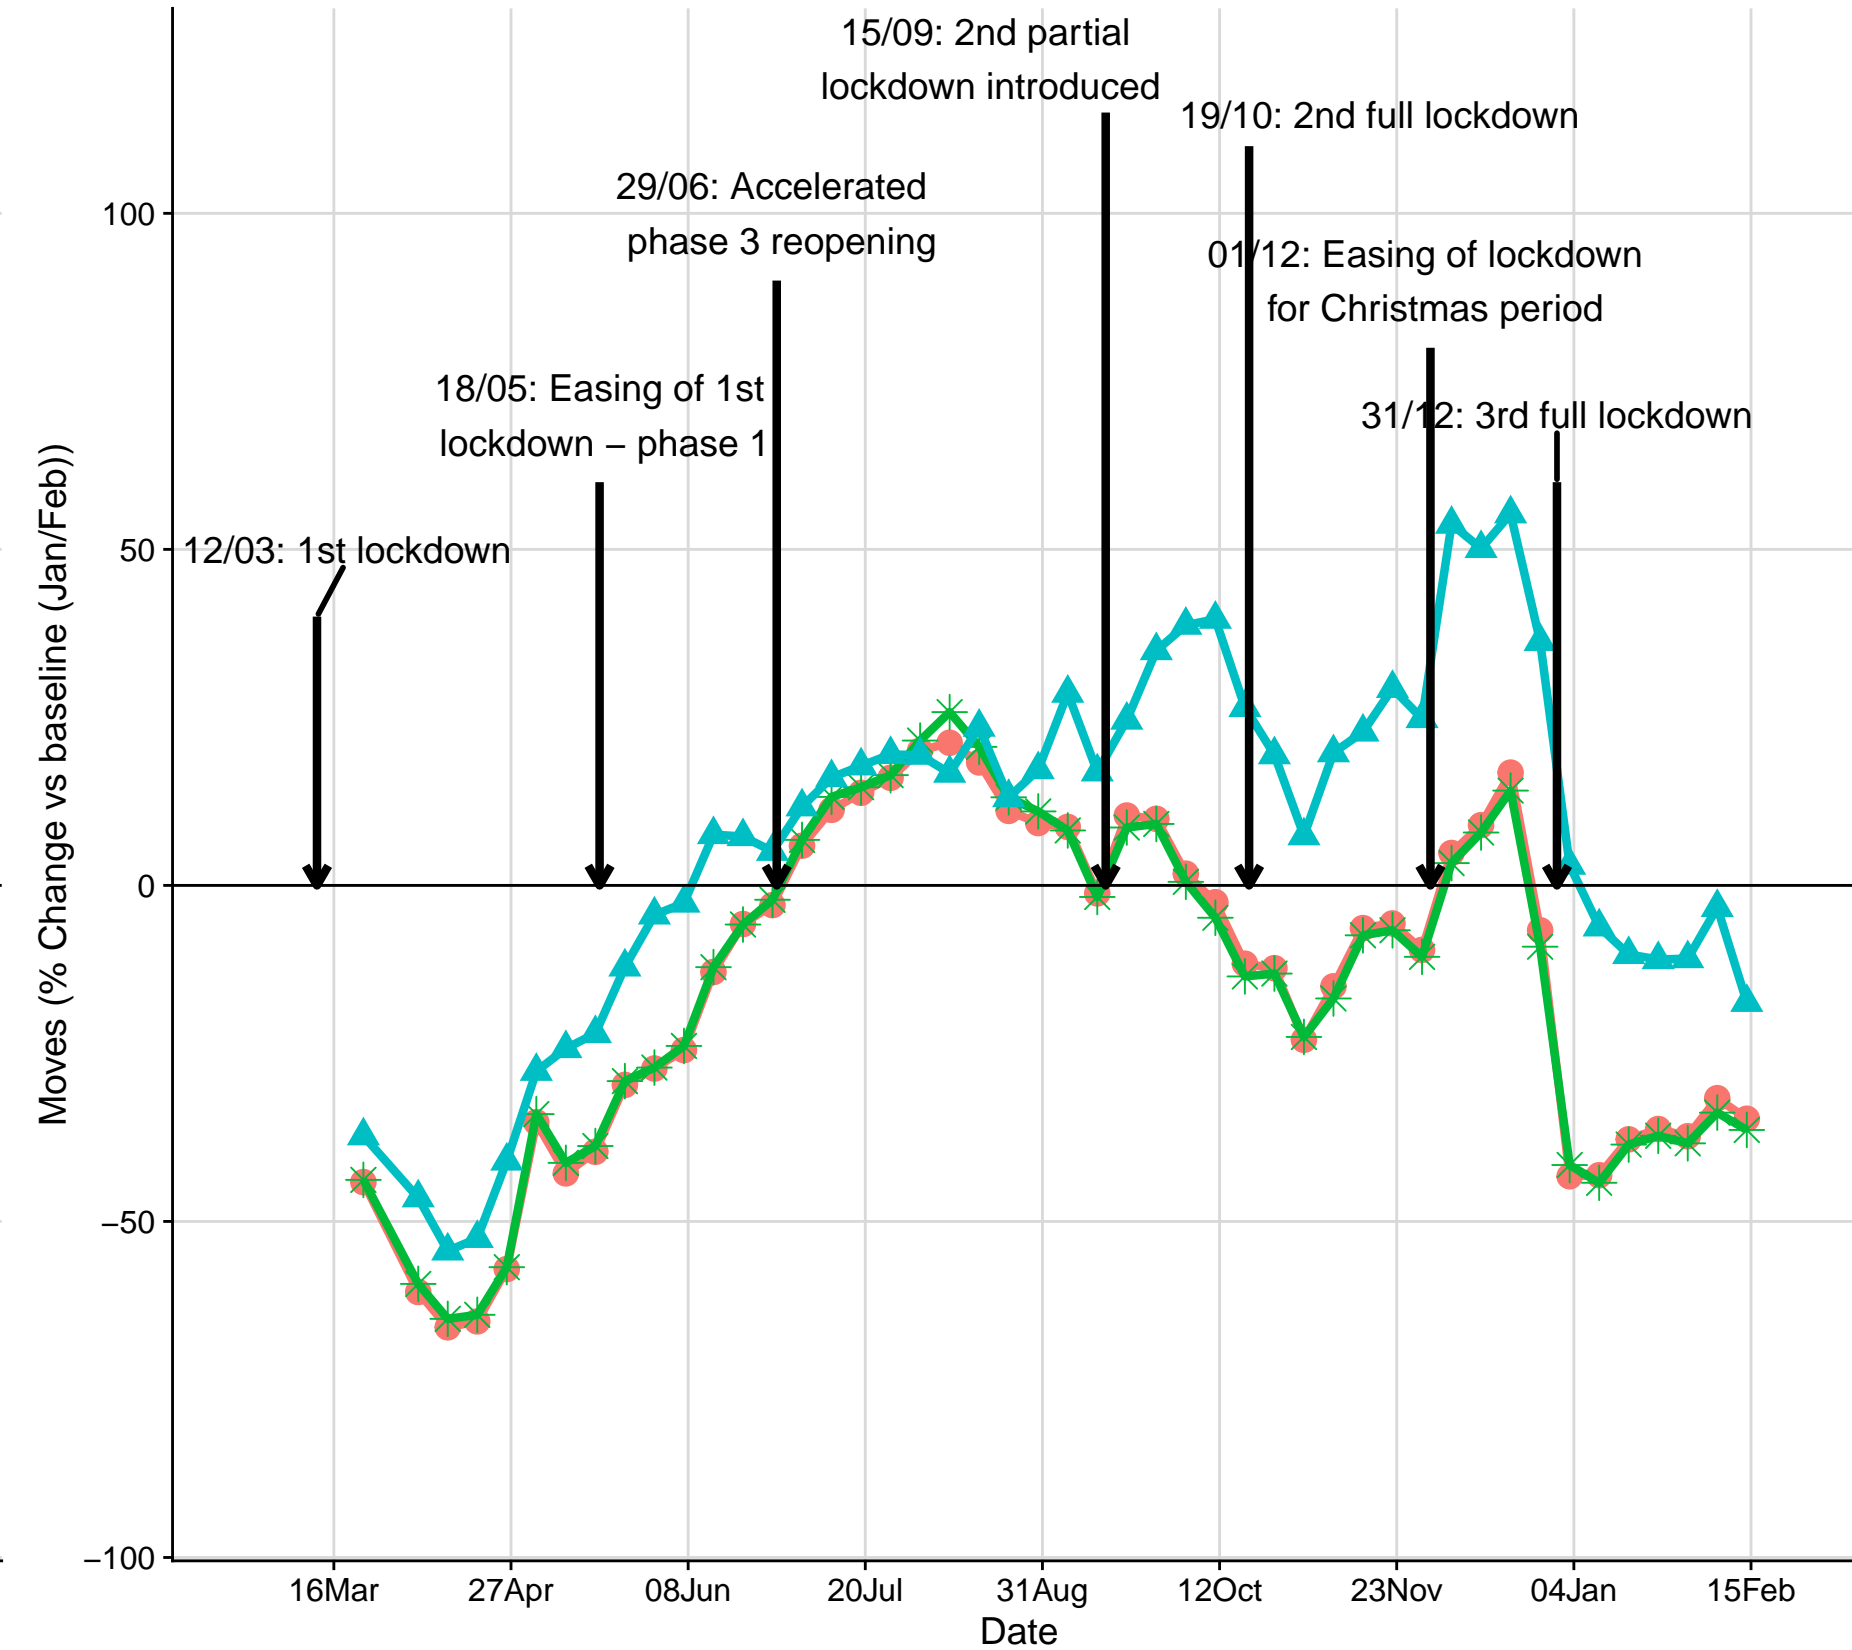

Movement type ● Movements into county \* Movements out of county ▲ Movements within county

## Clare

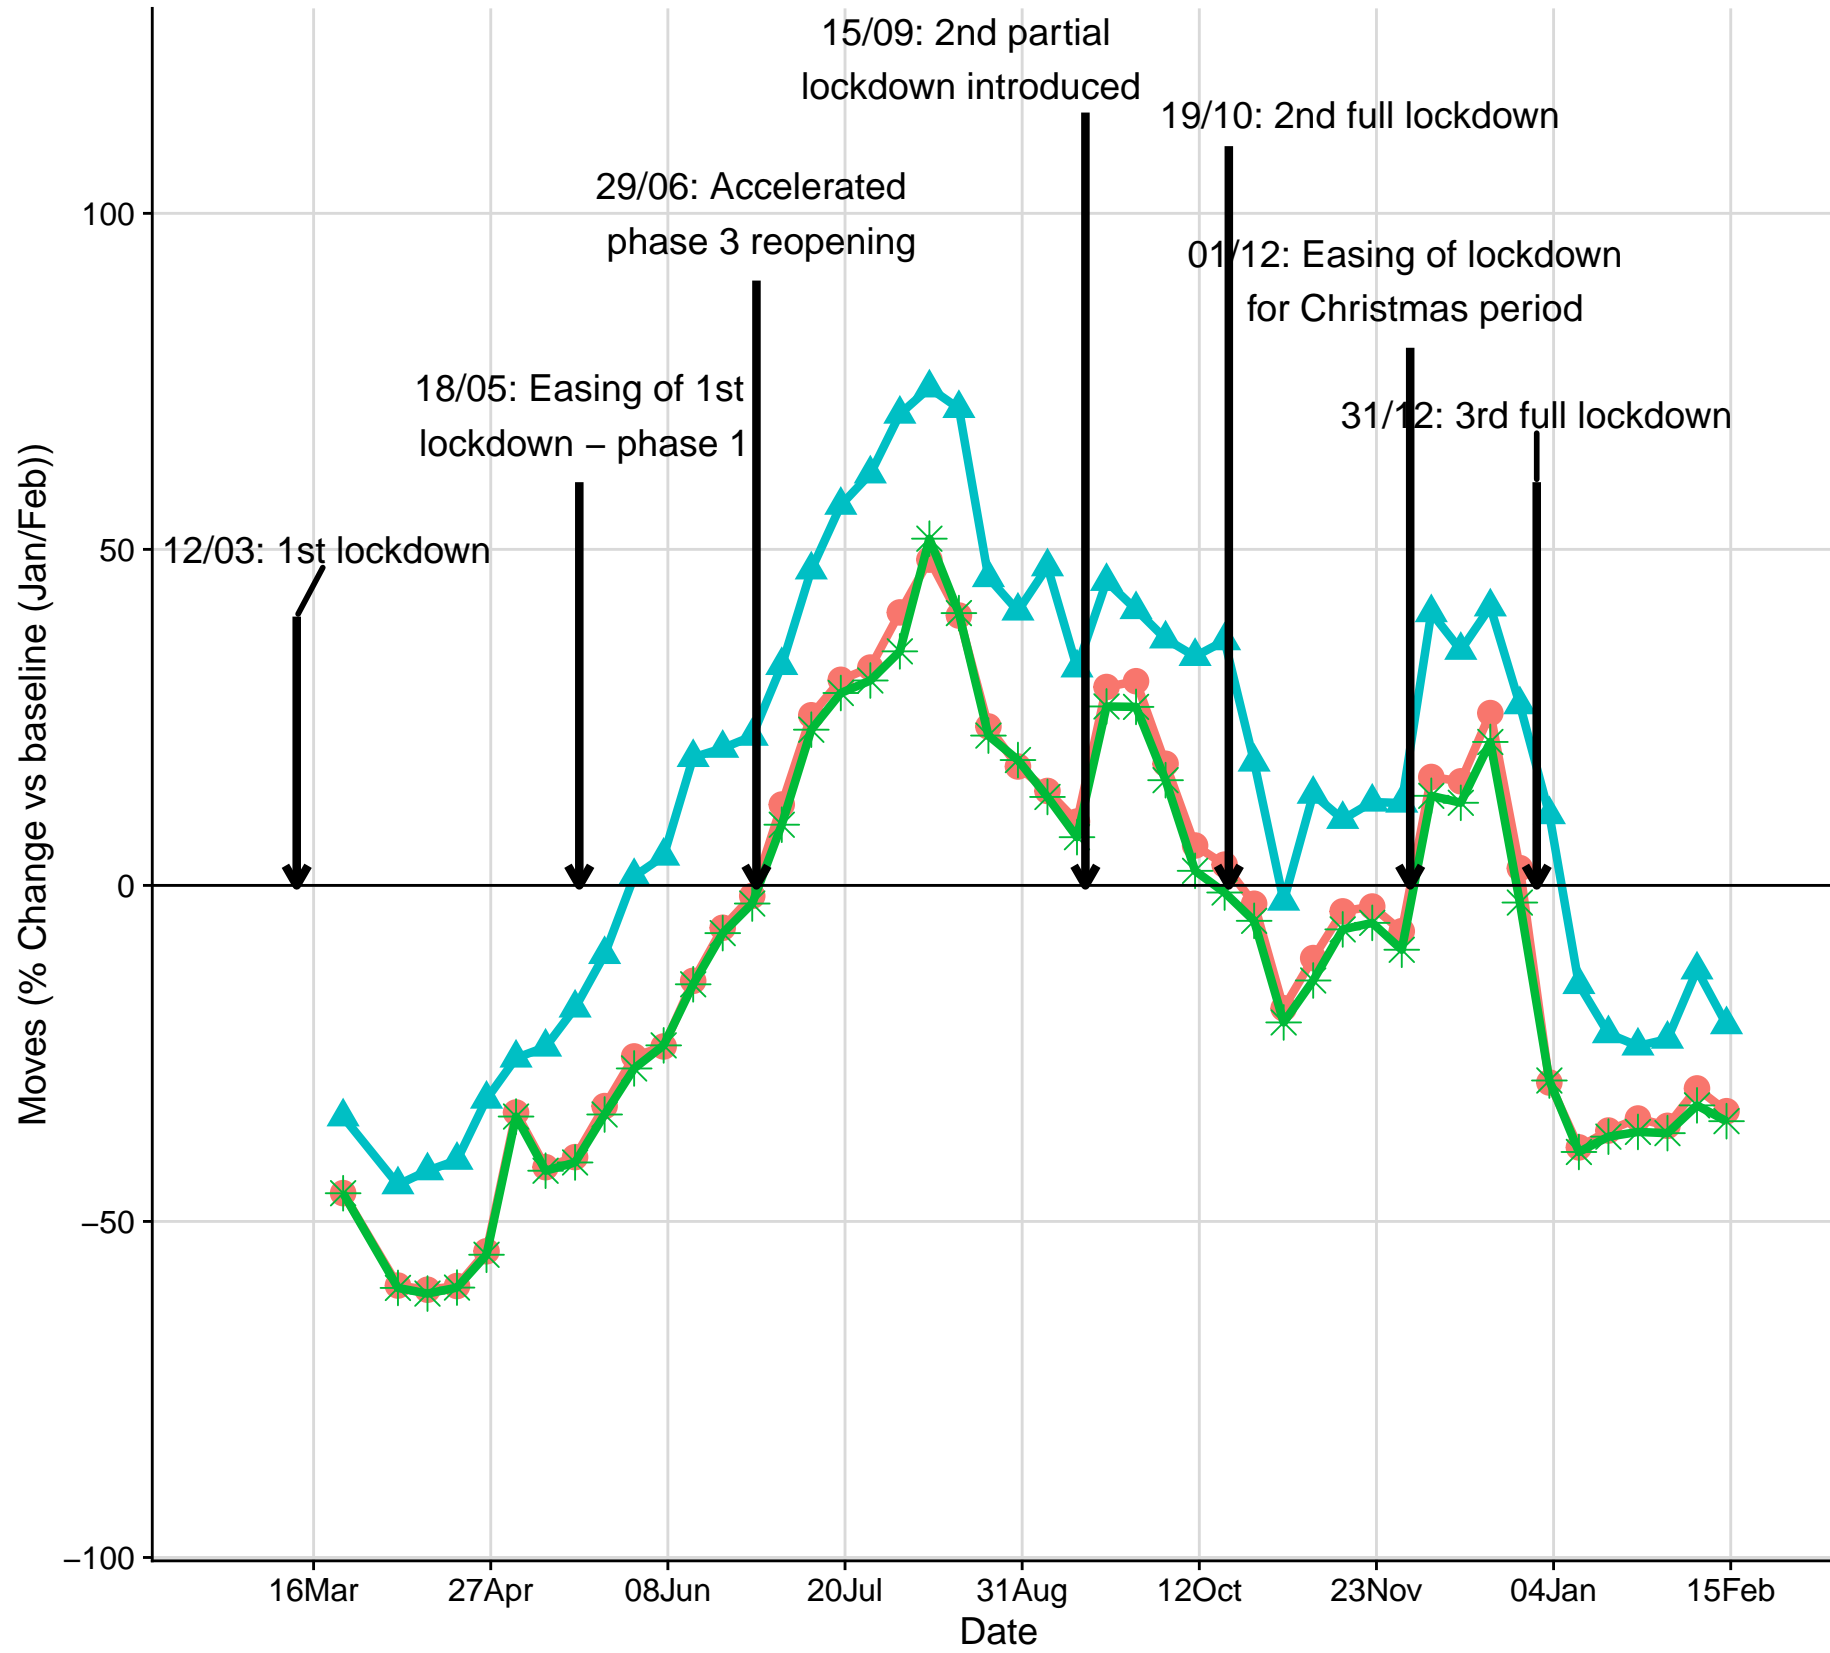

## Cork

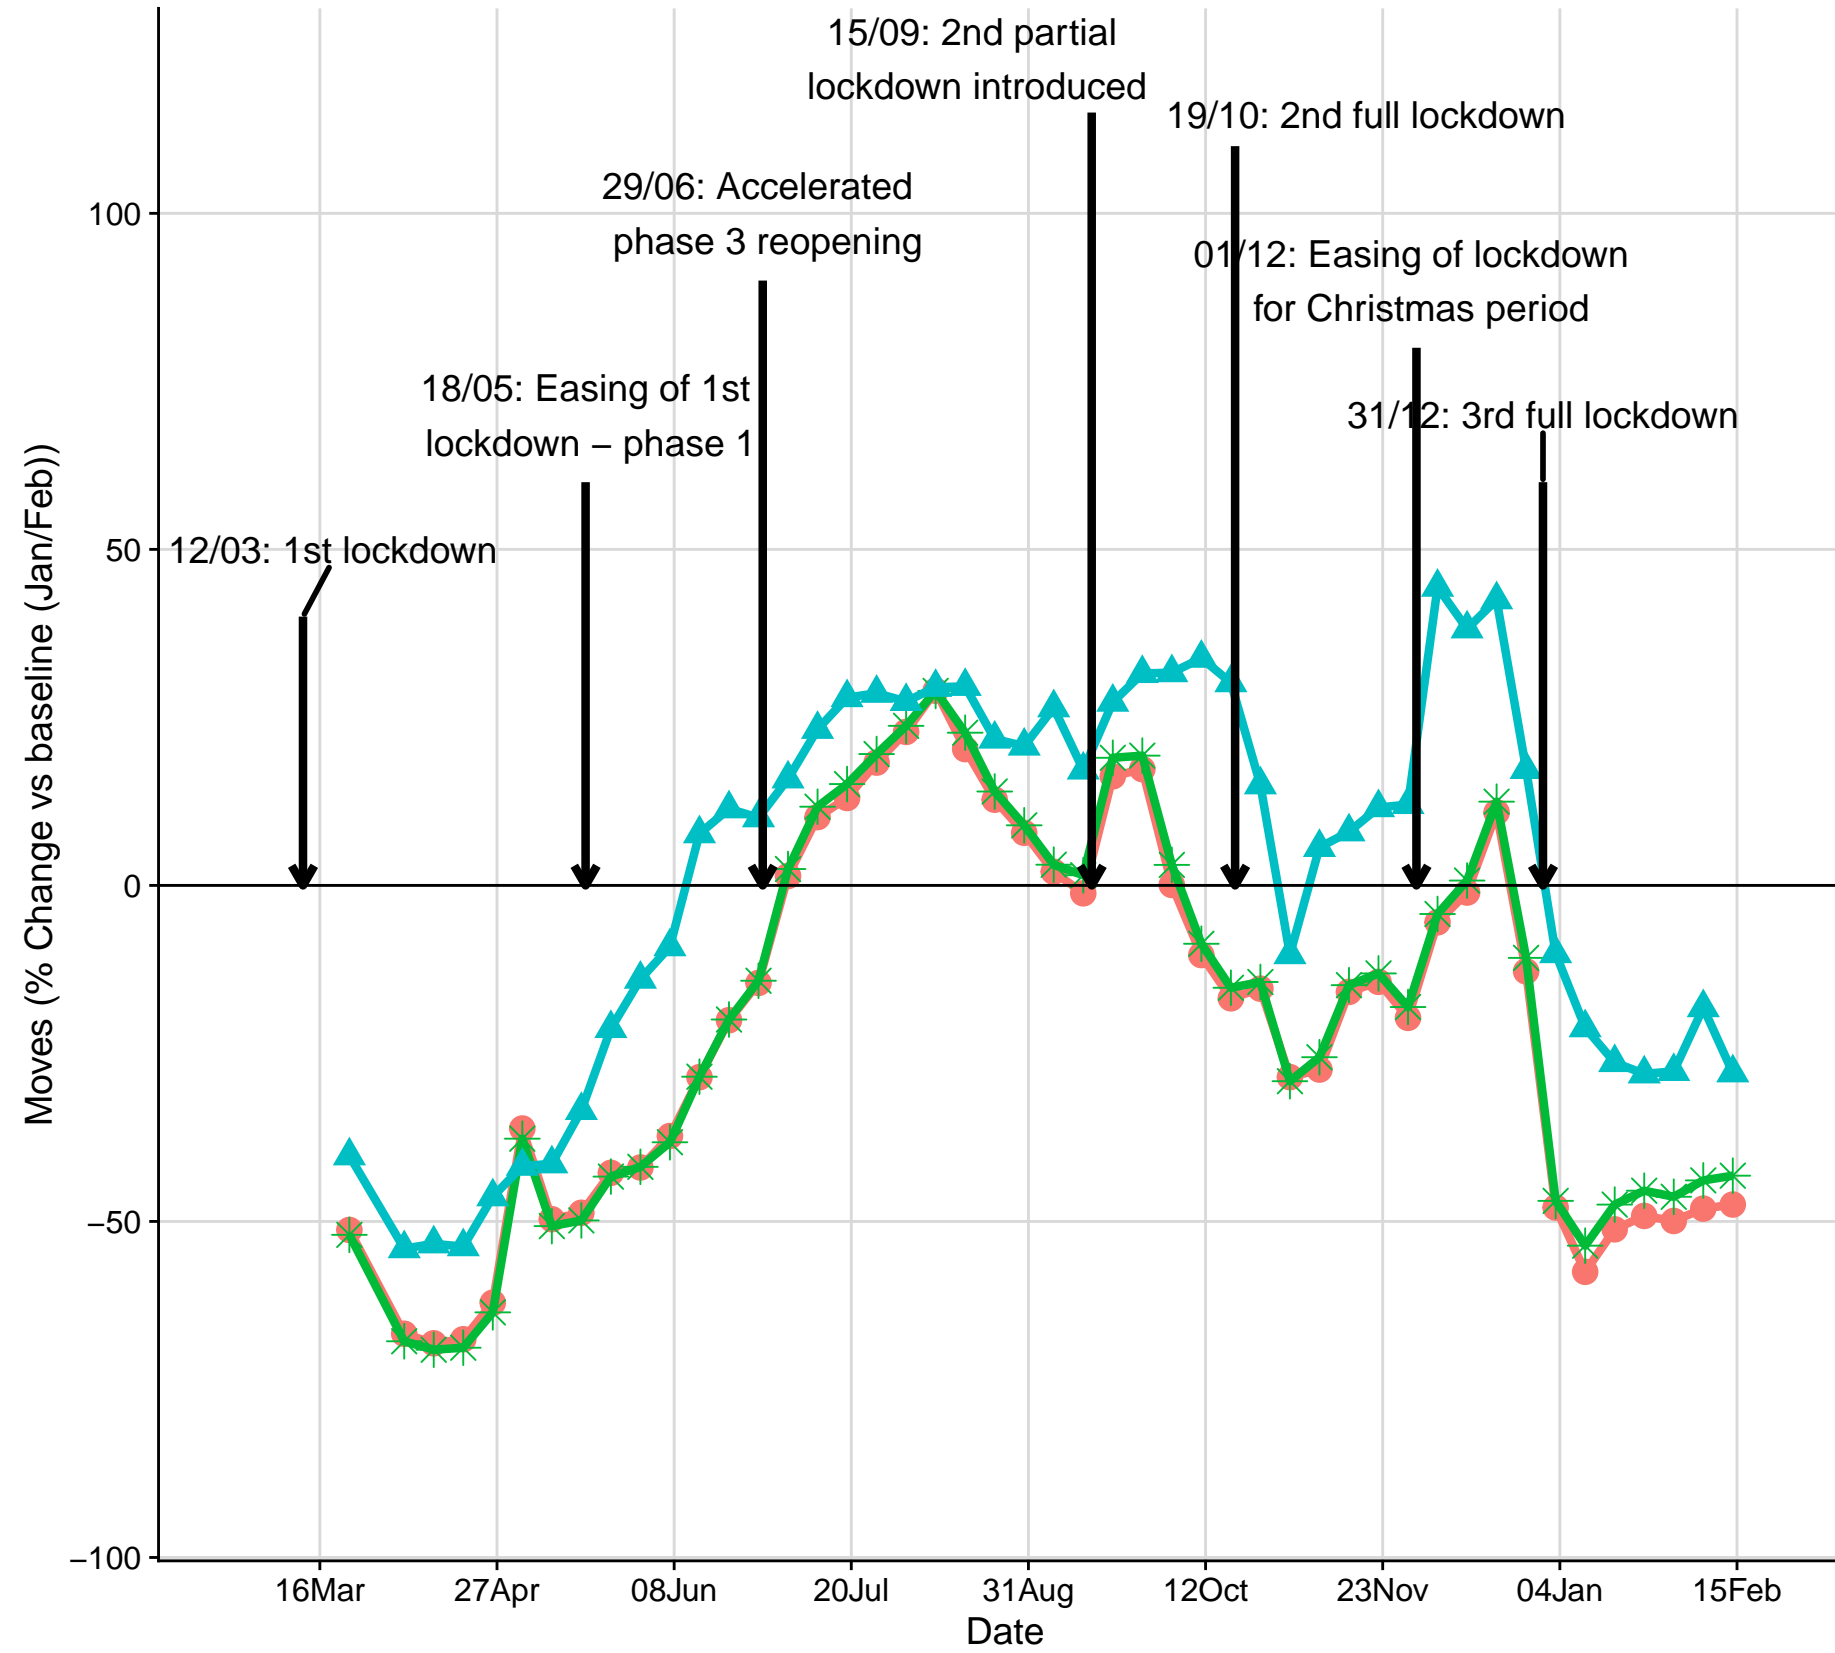

Movement type ● Movements into county \* Movements out of county ▲ Movements within county

## Donegal

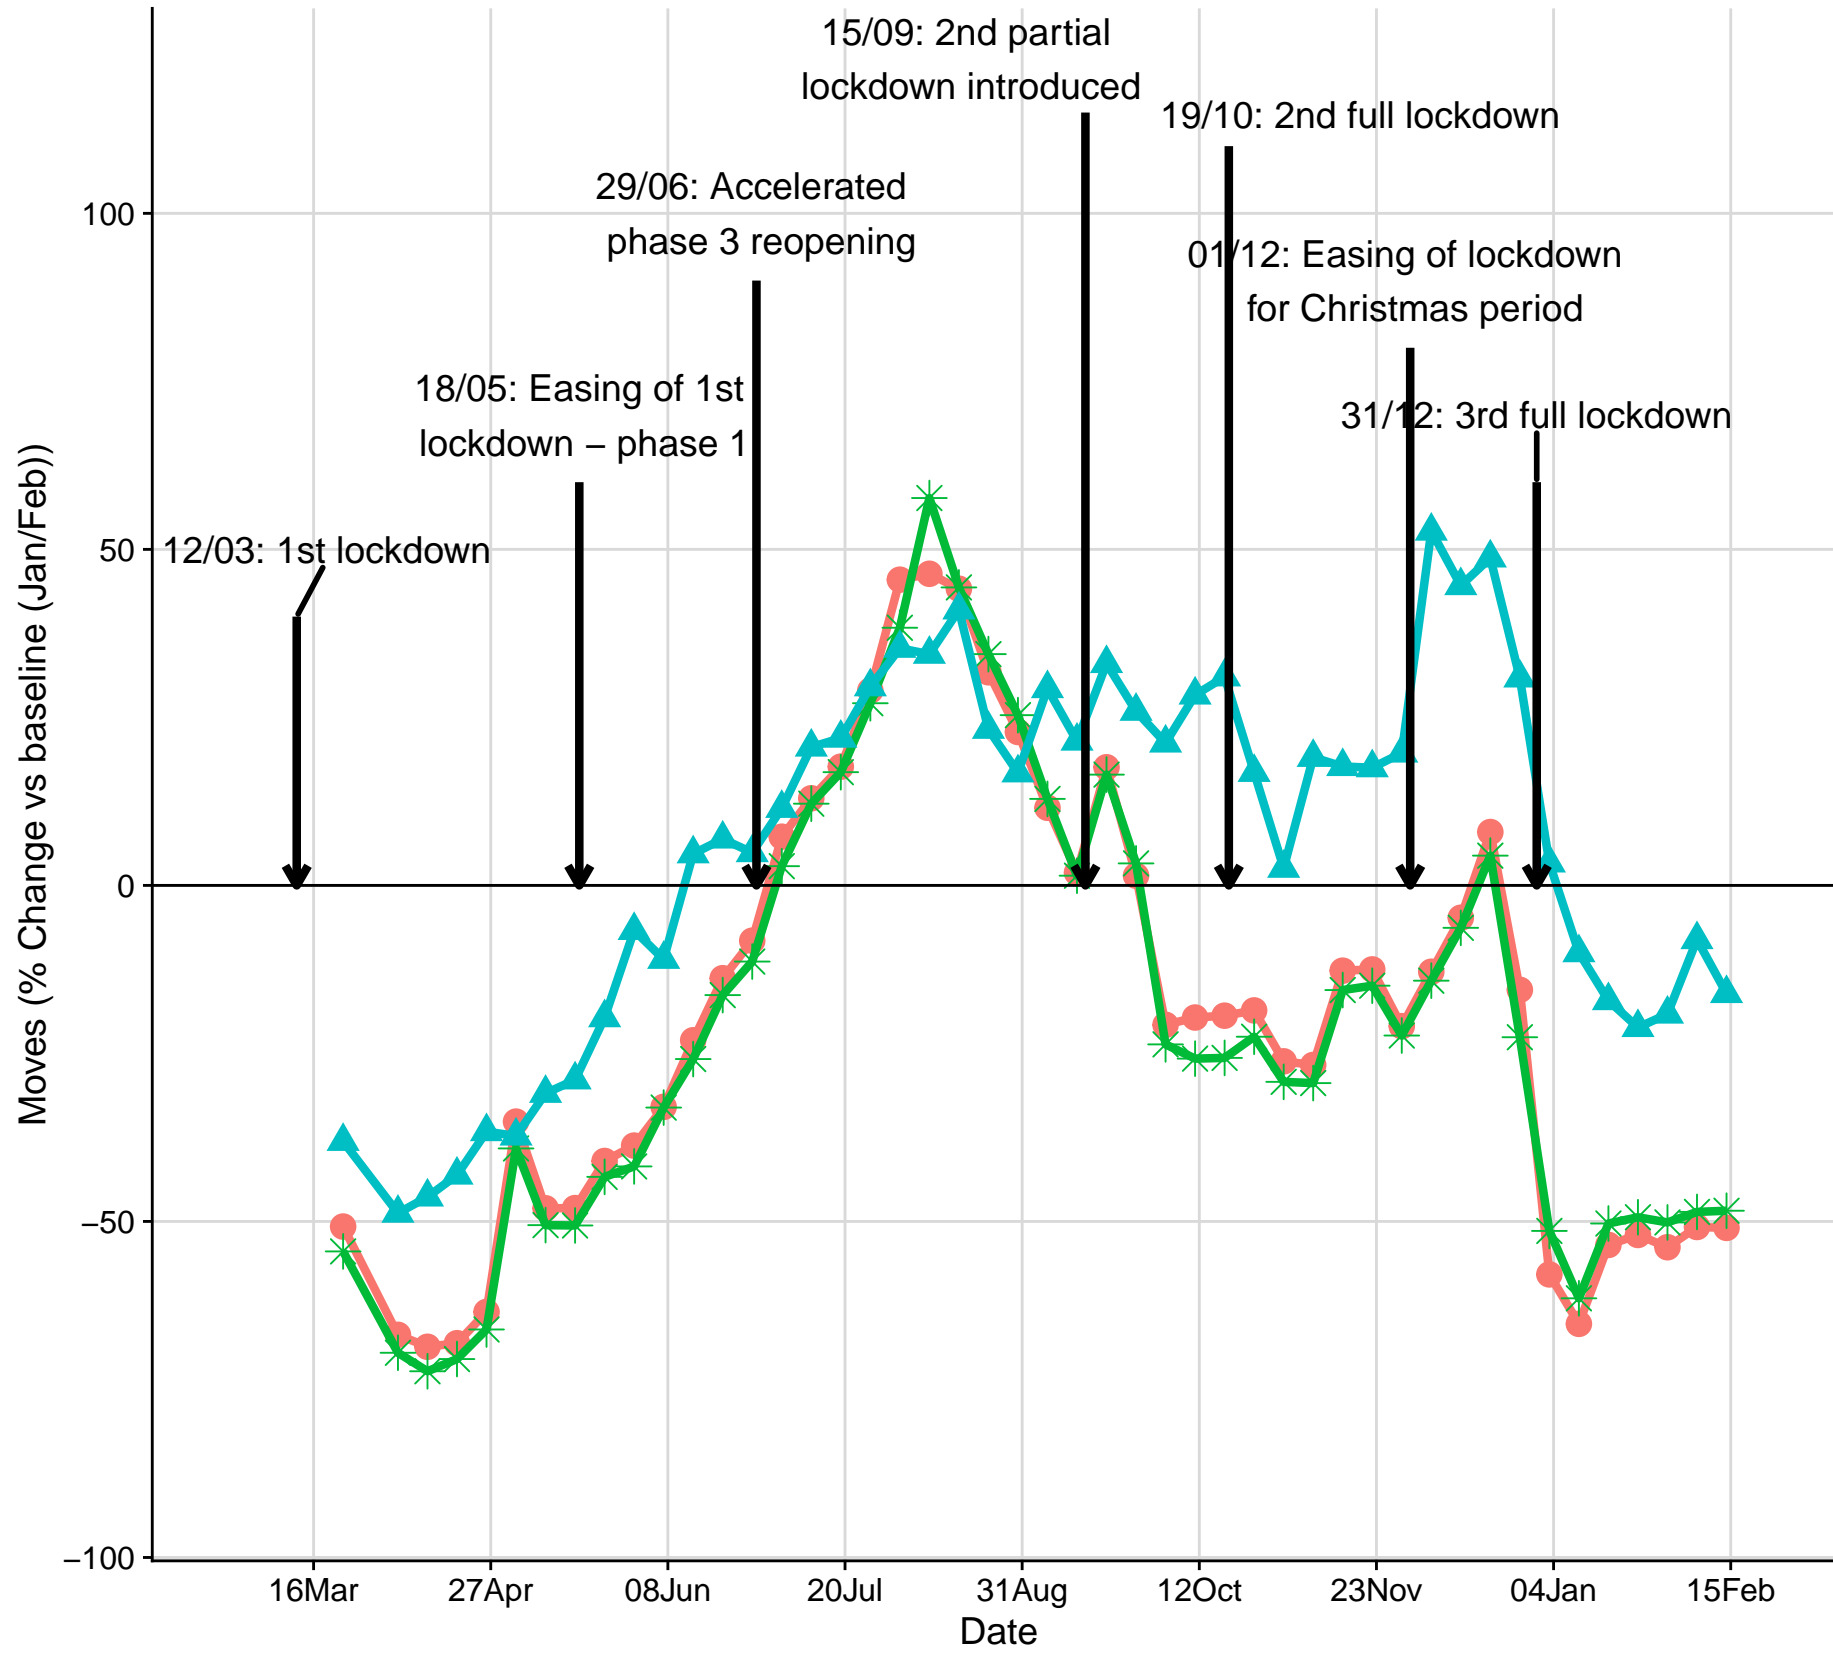

## Dublin

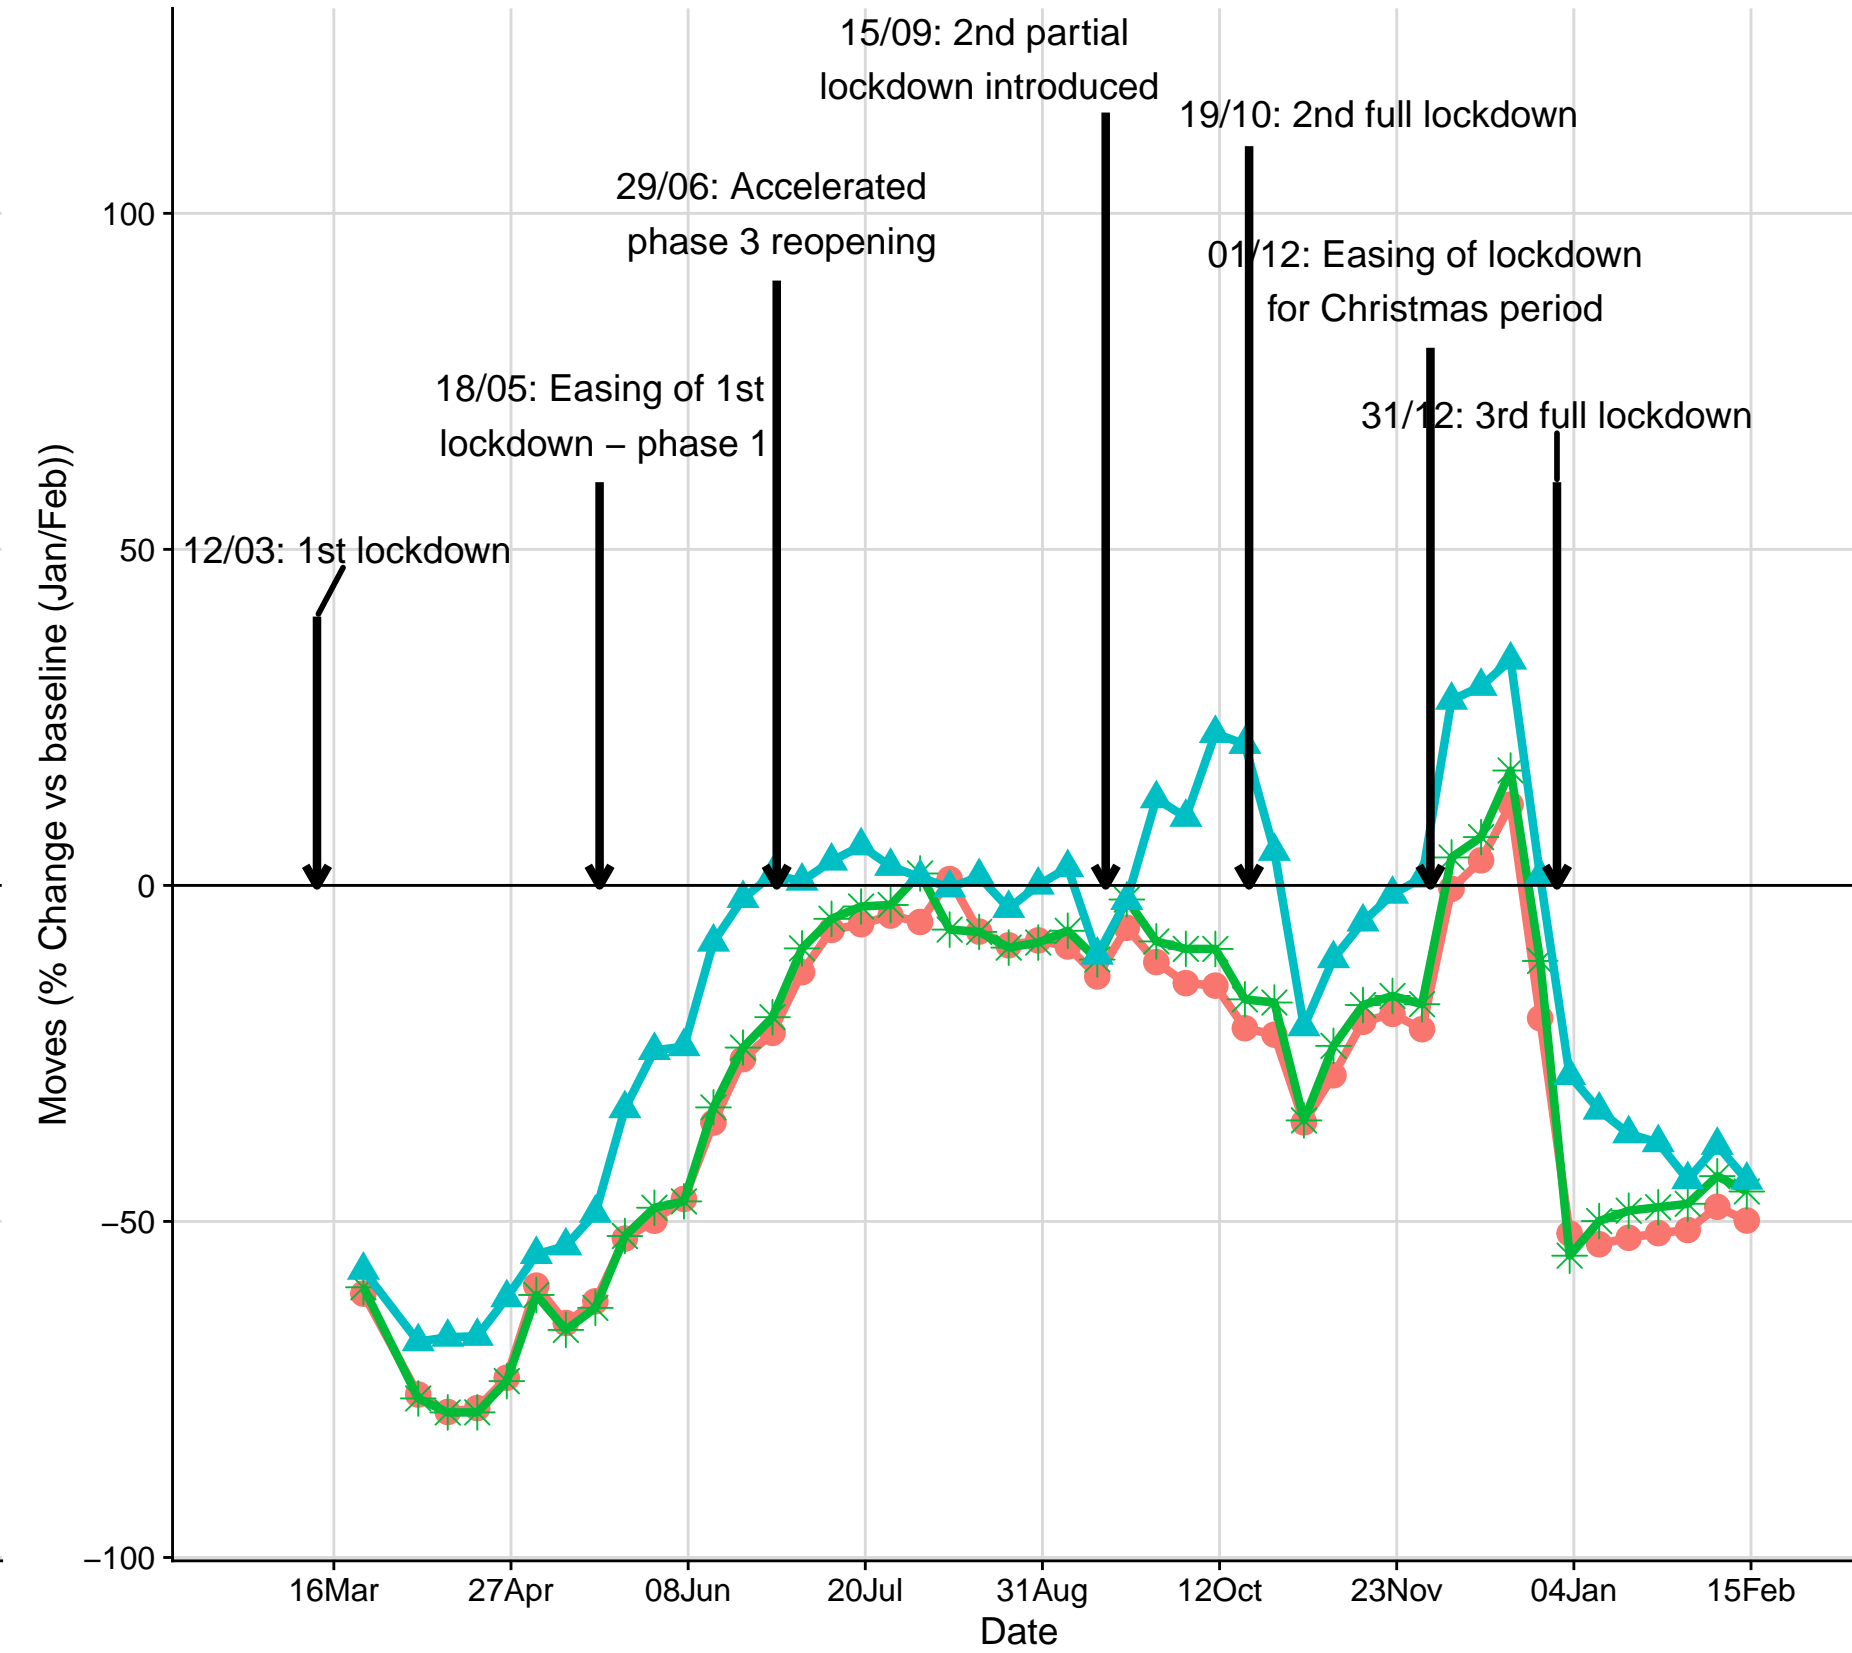

Movement type ● Movements into county \* Movements out of county ▲ Movements within county

**Galway**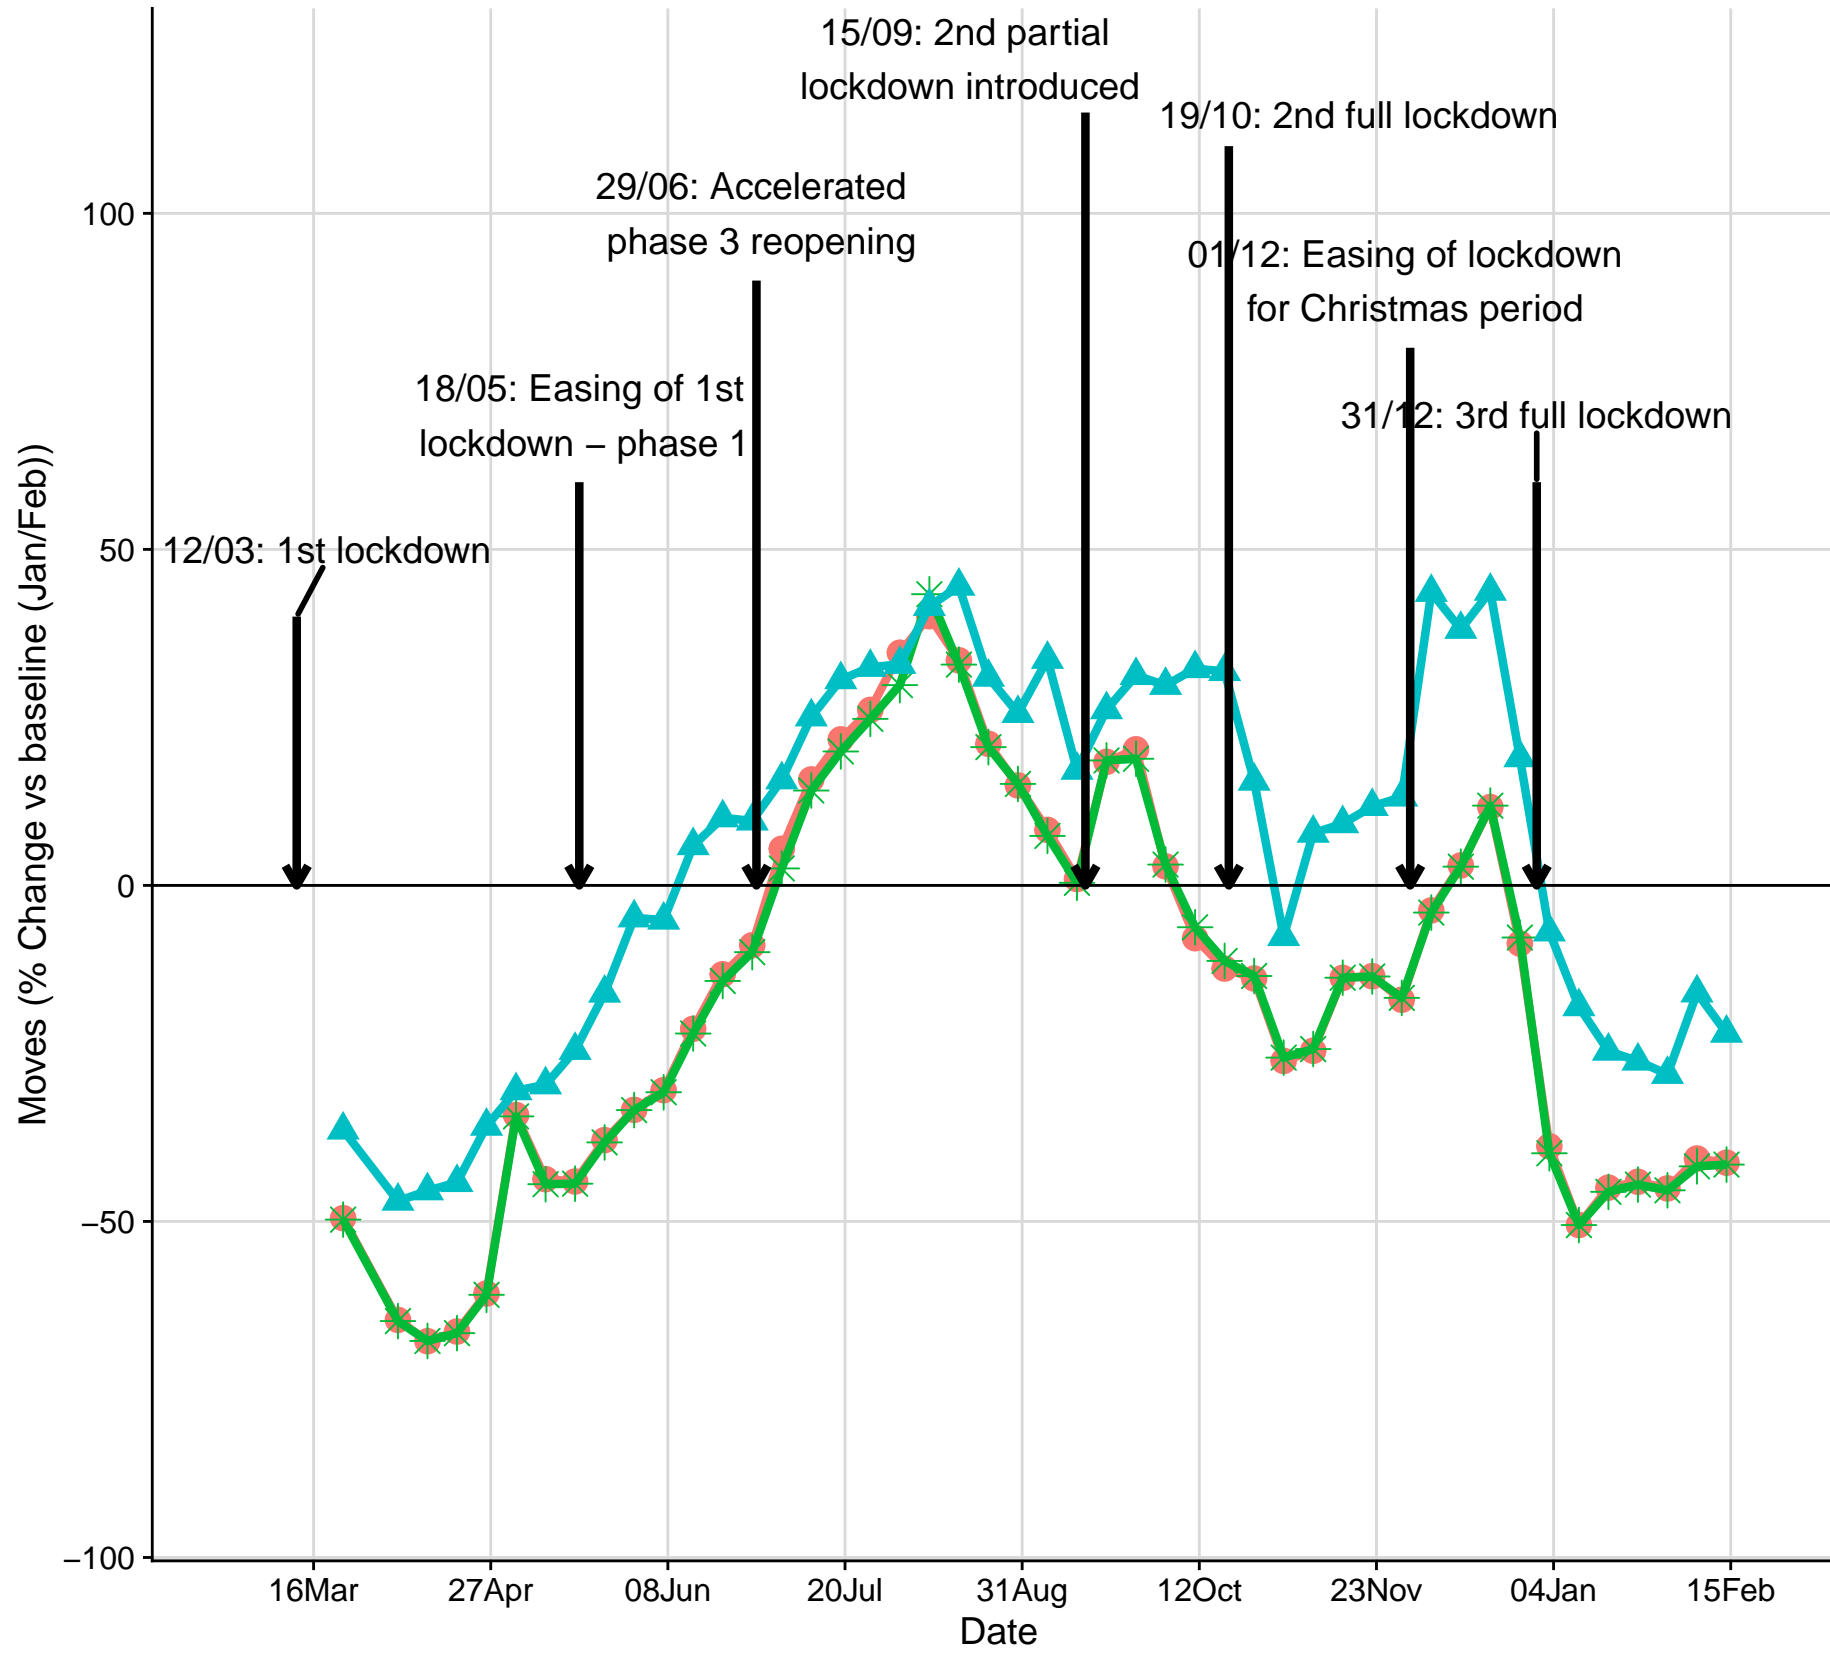**Kerry**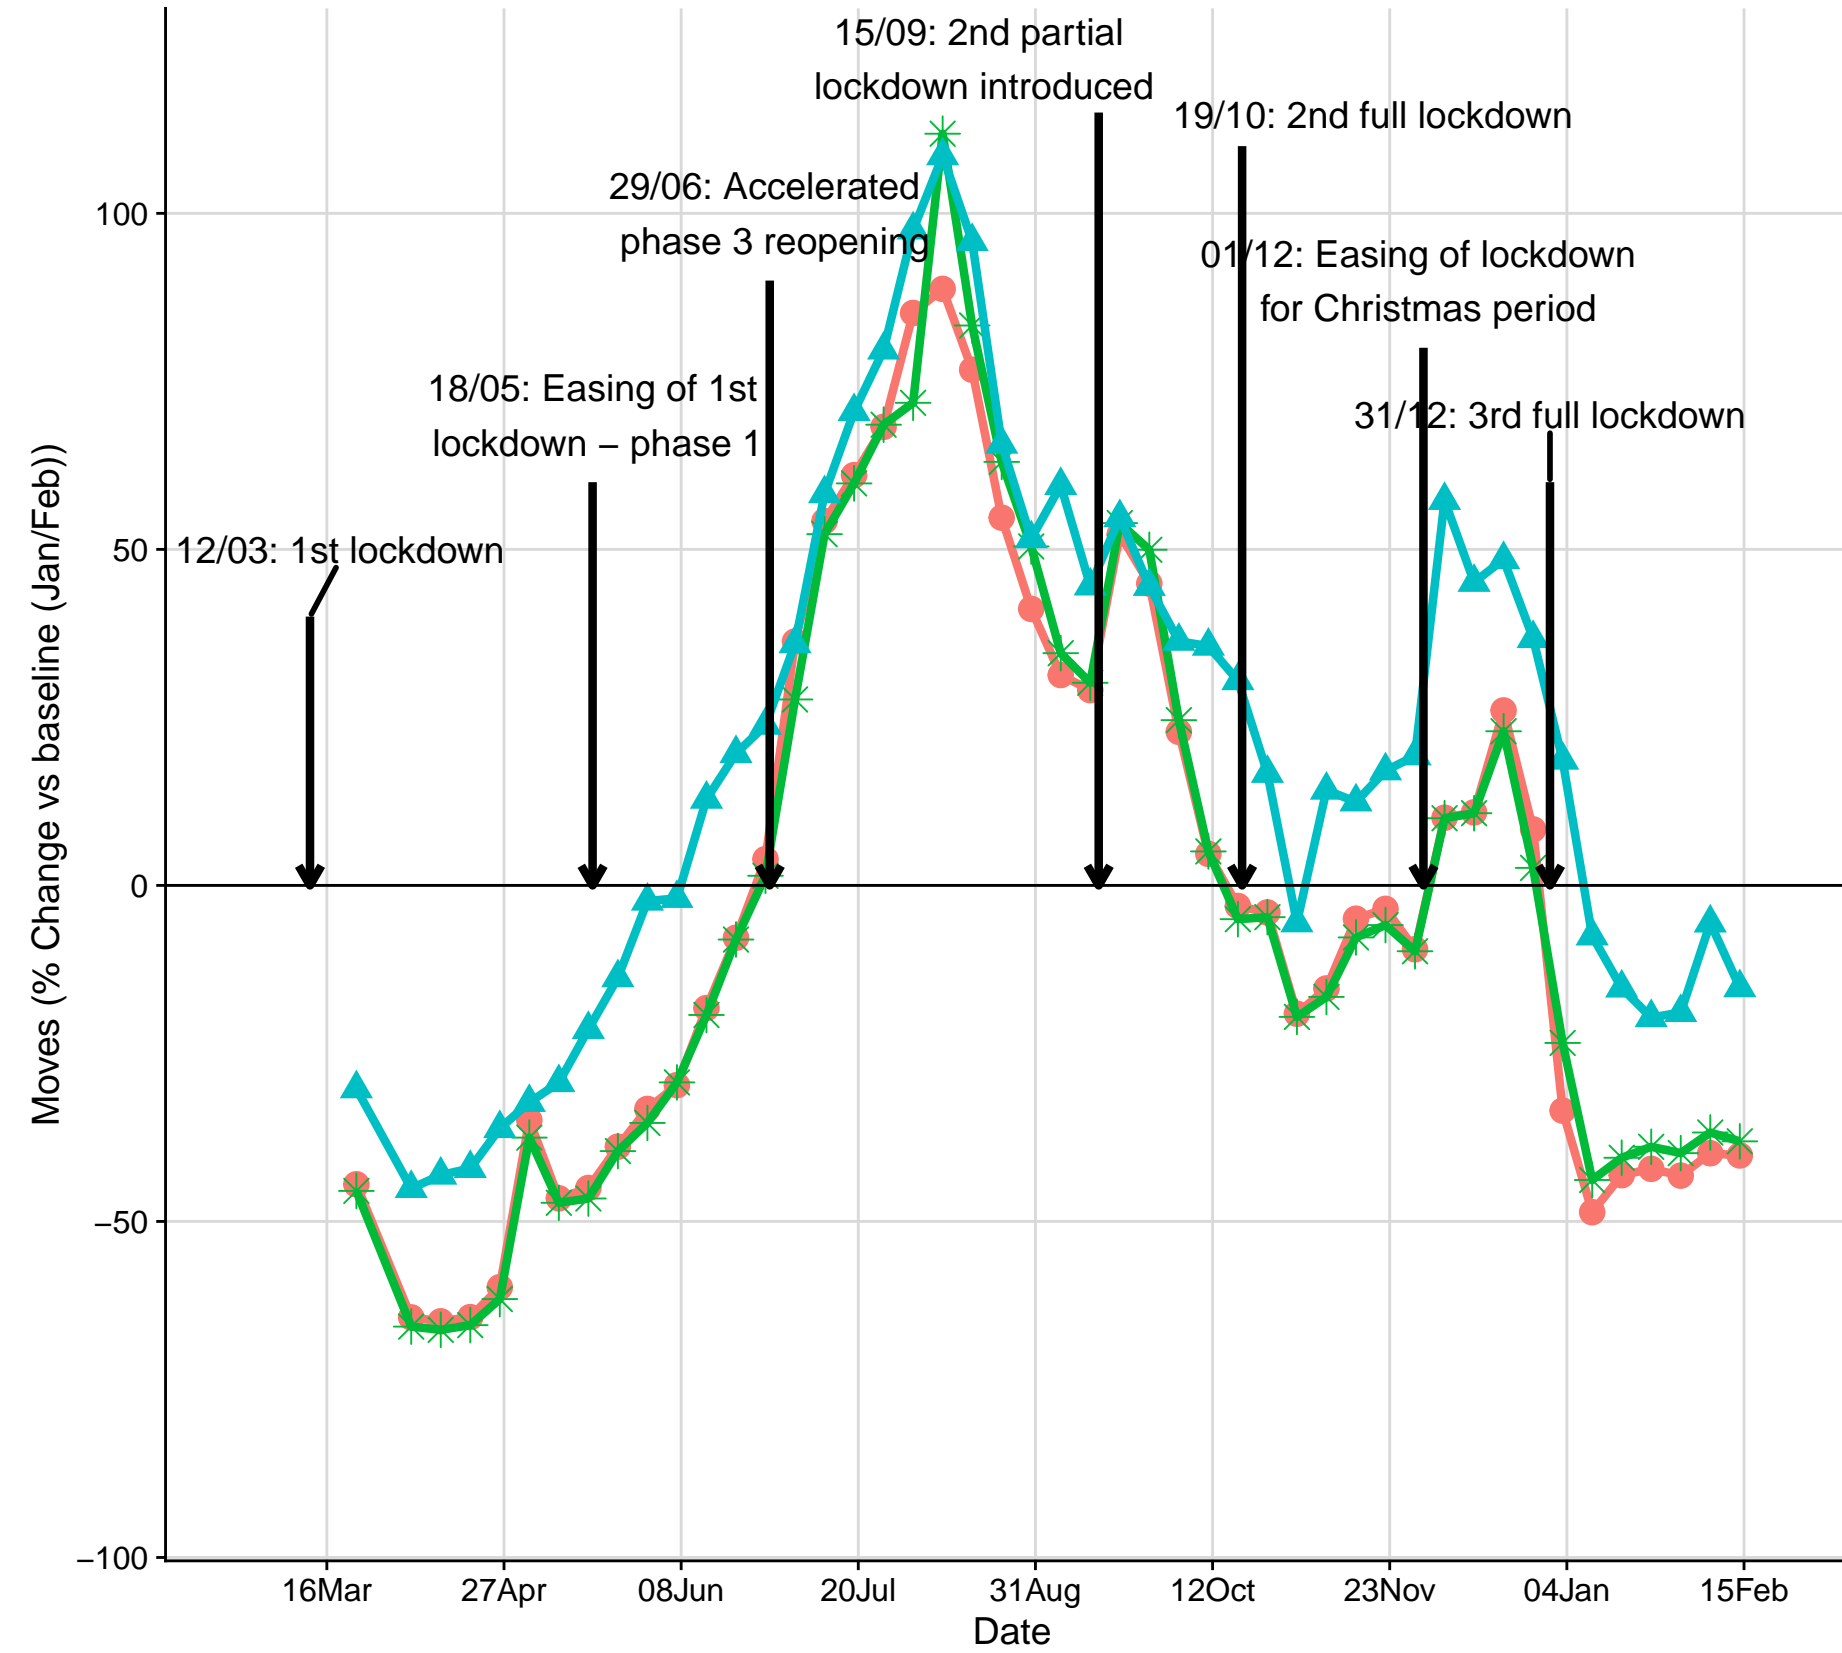

Movement type ● Movements into county \* Movements out of county ▲ Movements within county

**Kildare**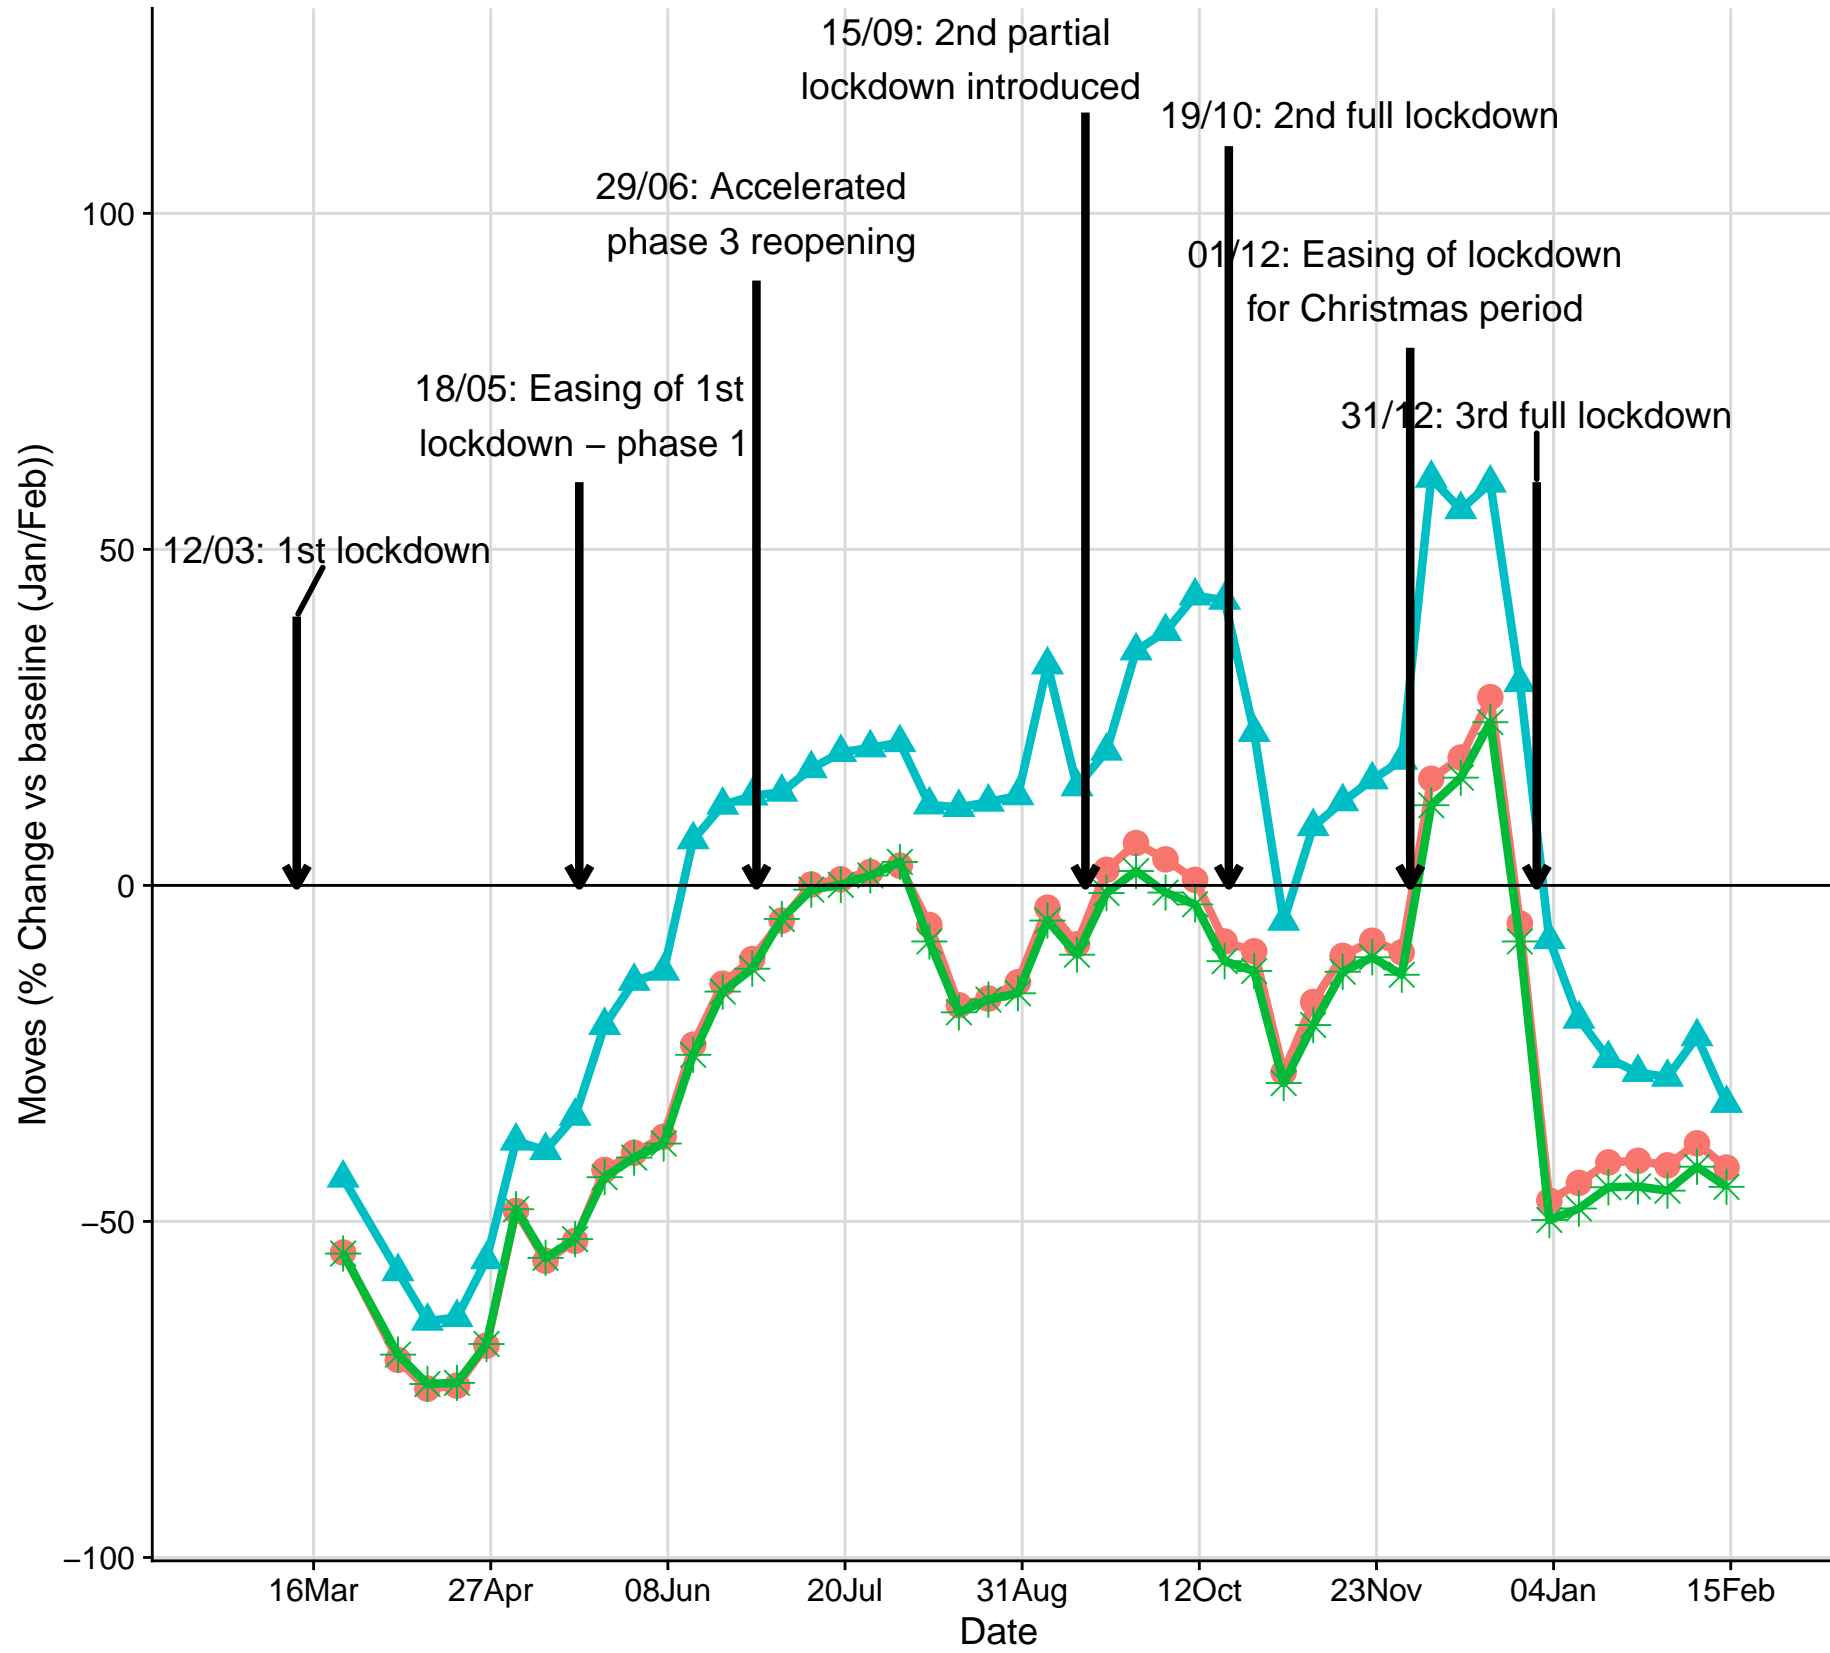**Kilkenny**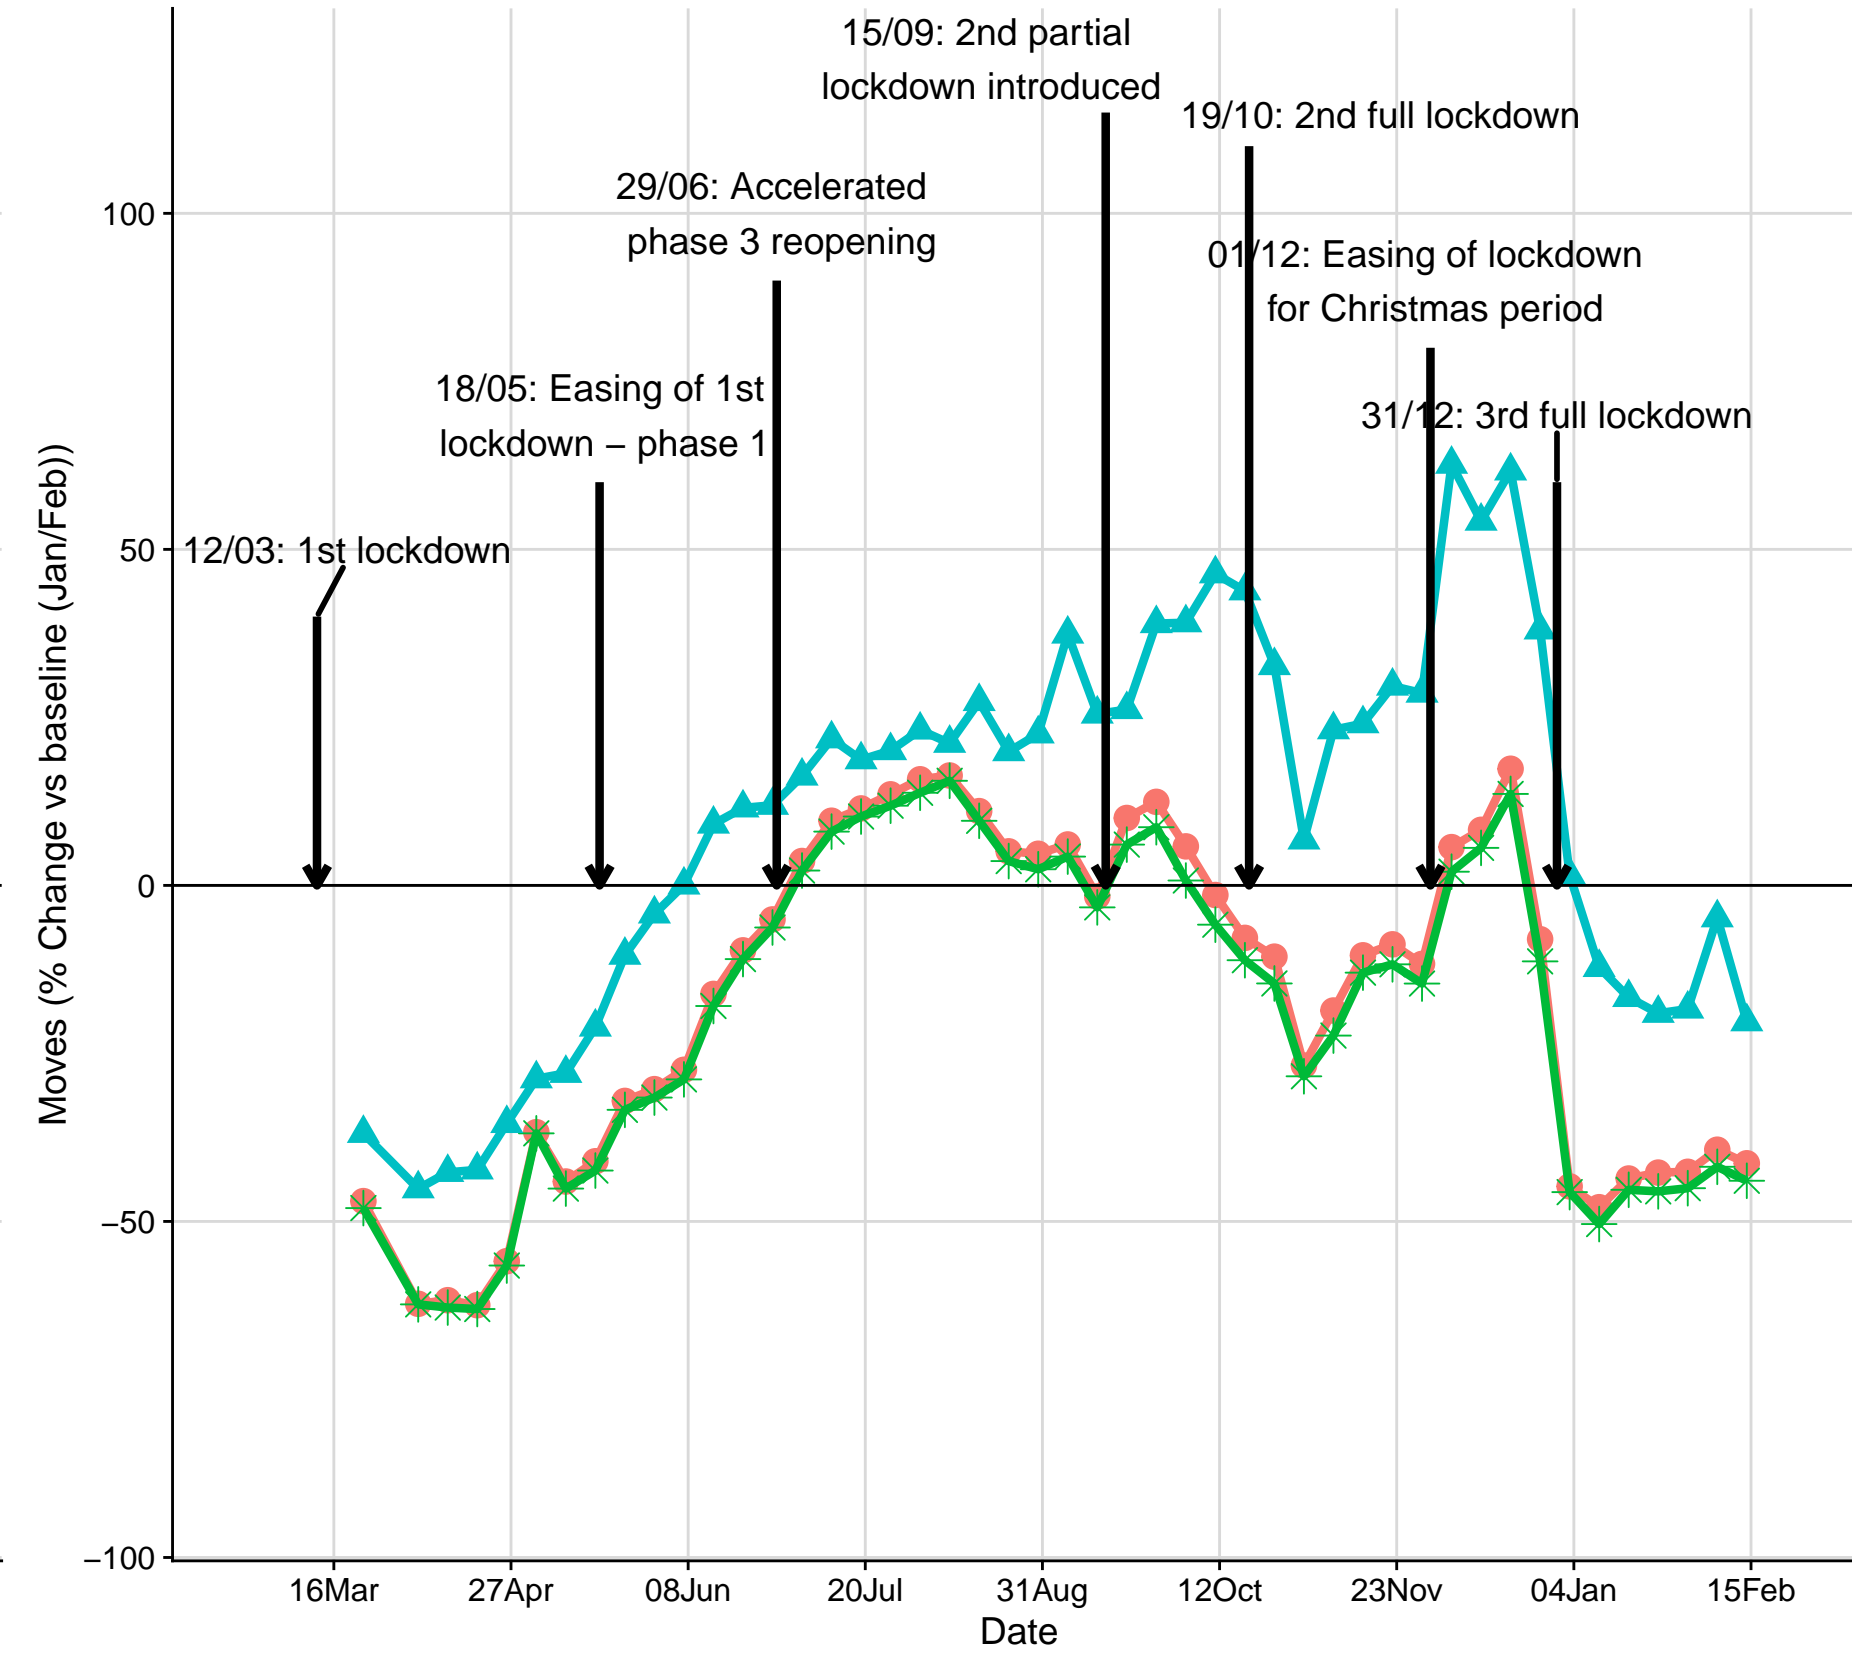

Movement type ● Movements into county \* Movements out of county ▲ Movements within county

## Laois

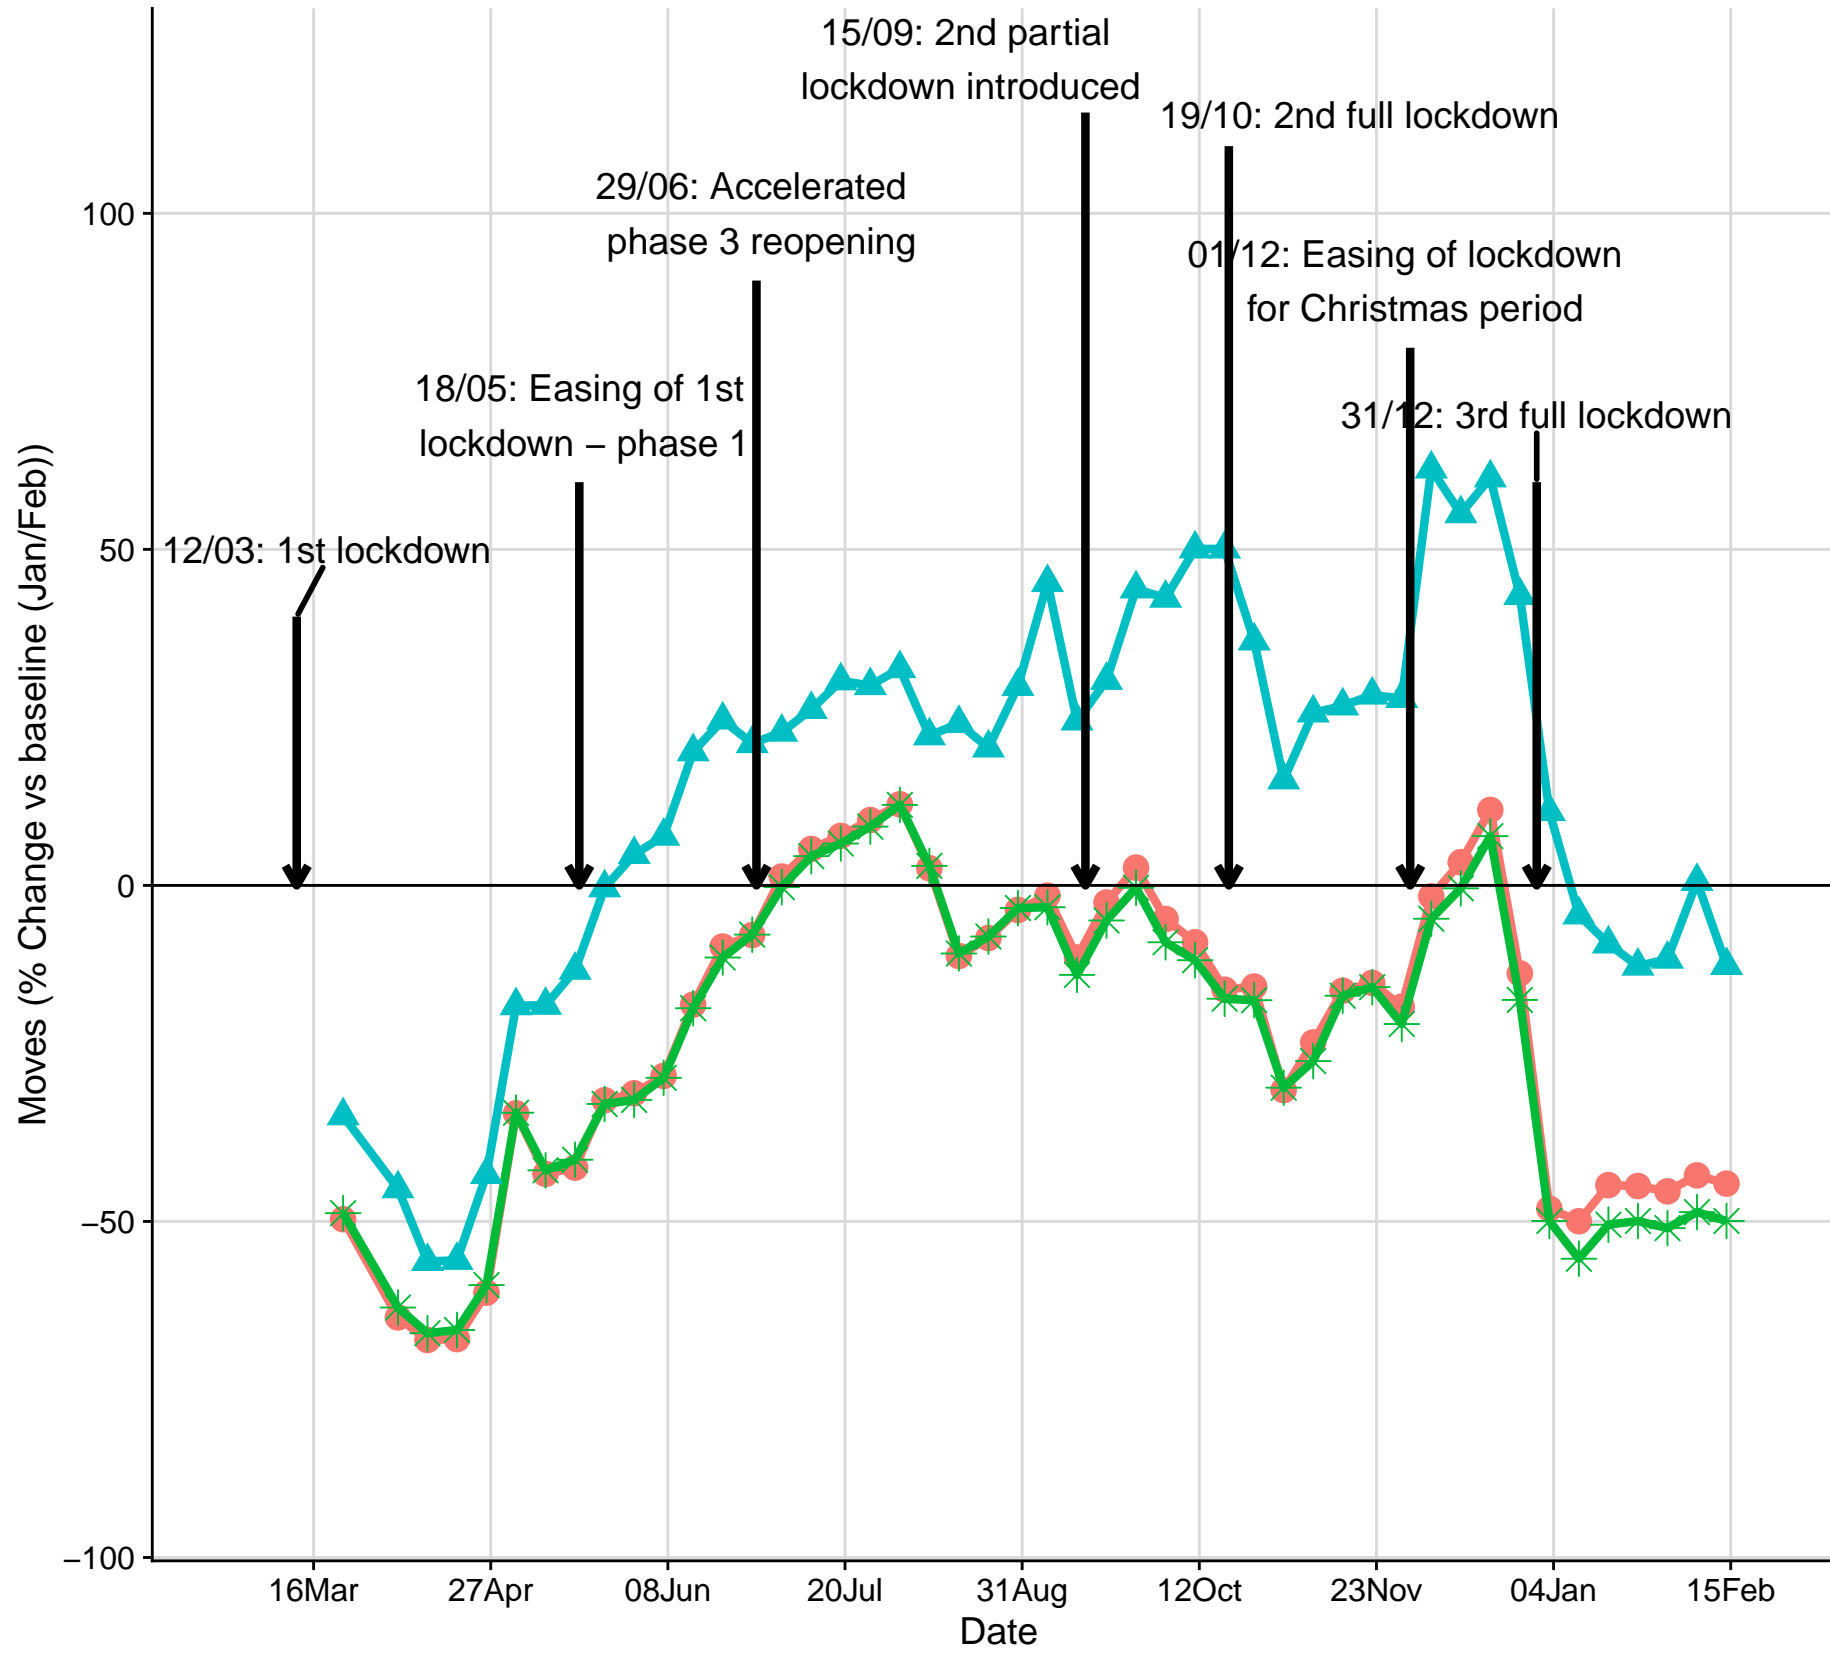

## Leitrim

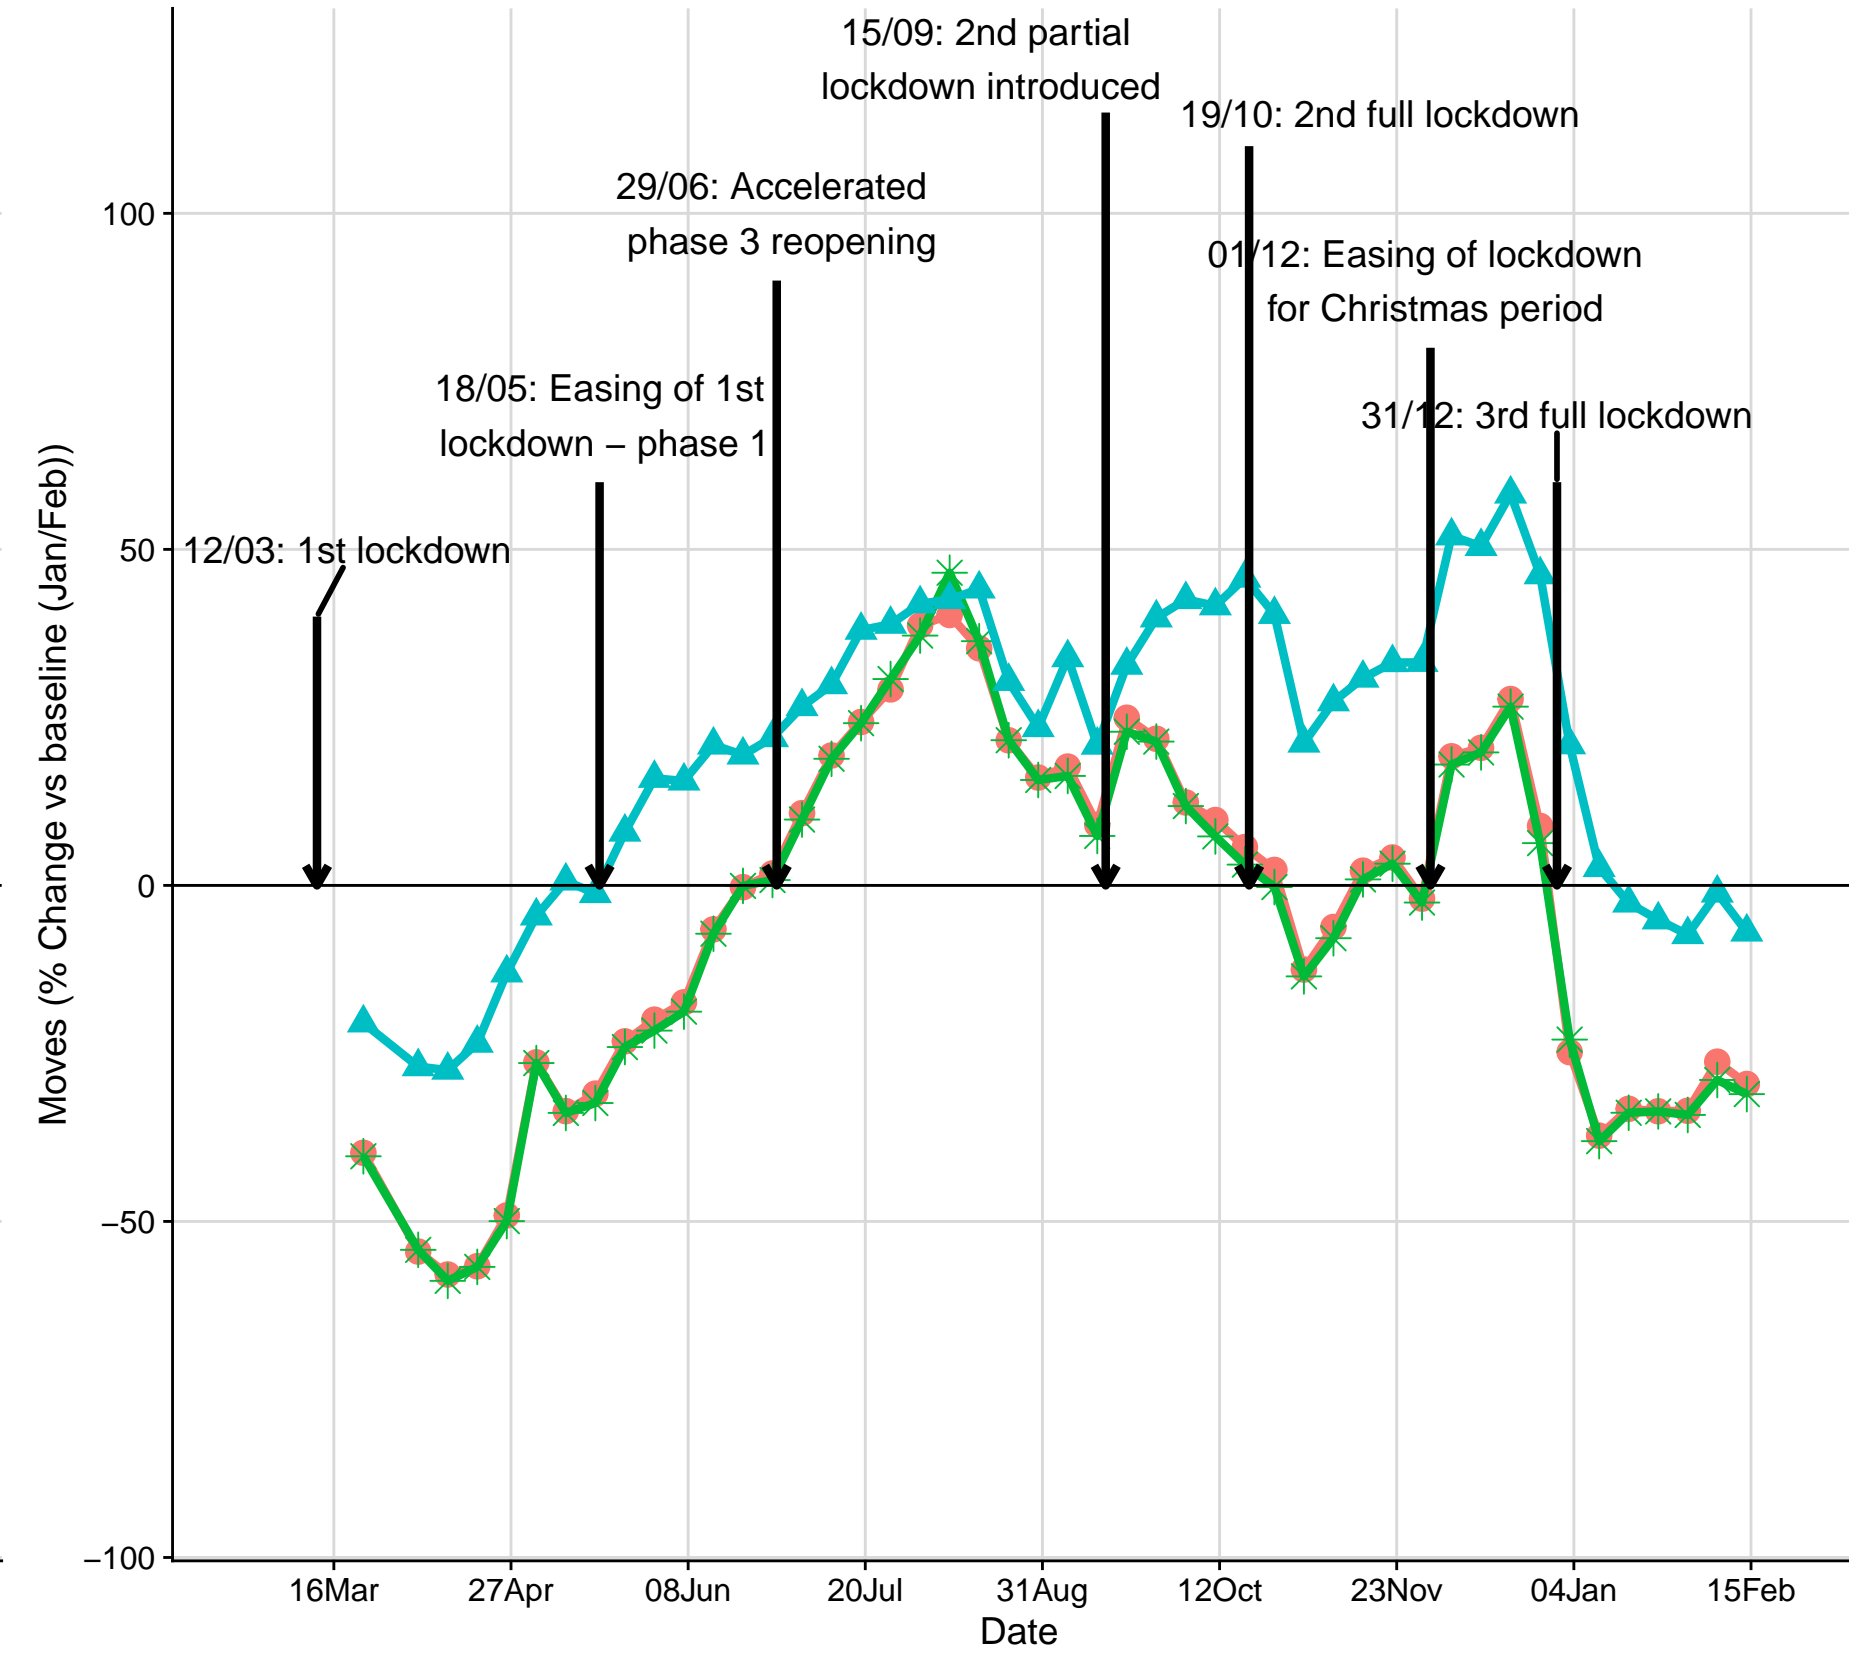

## Limerick

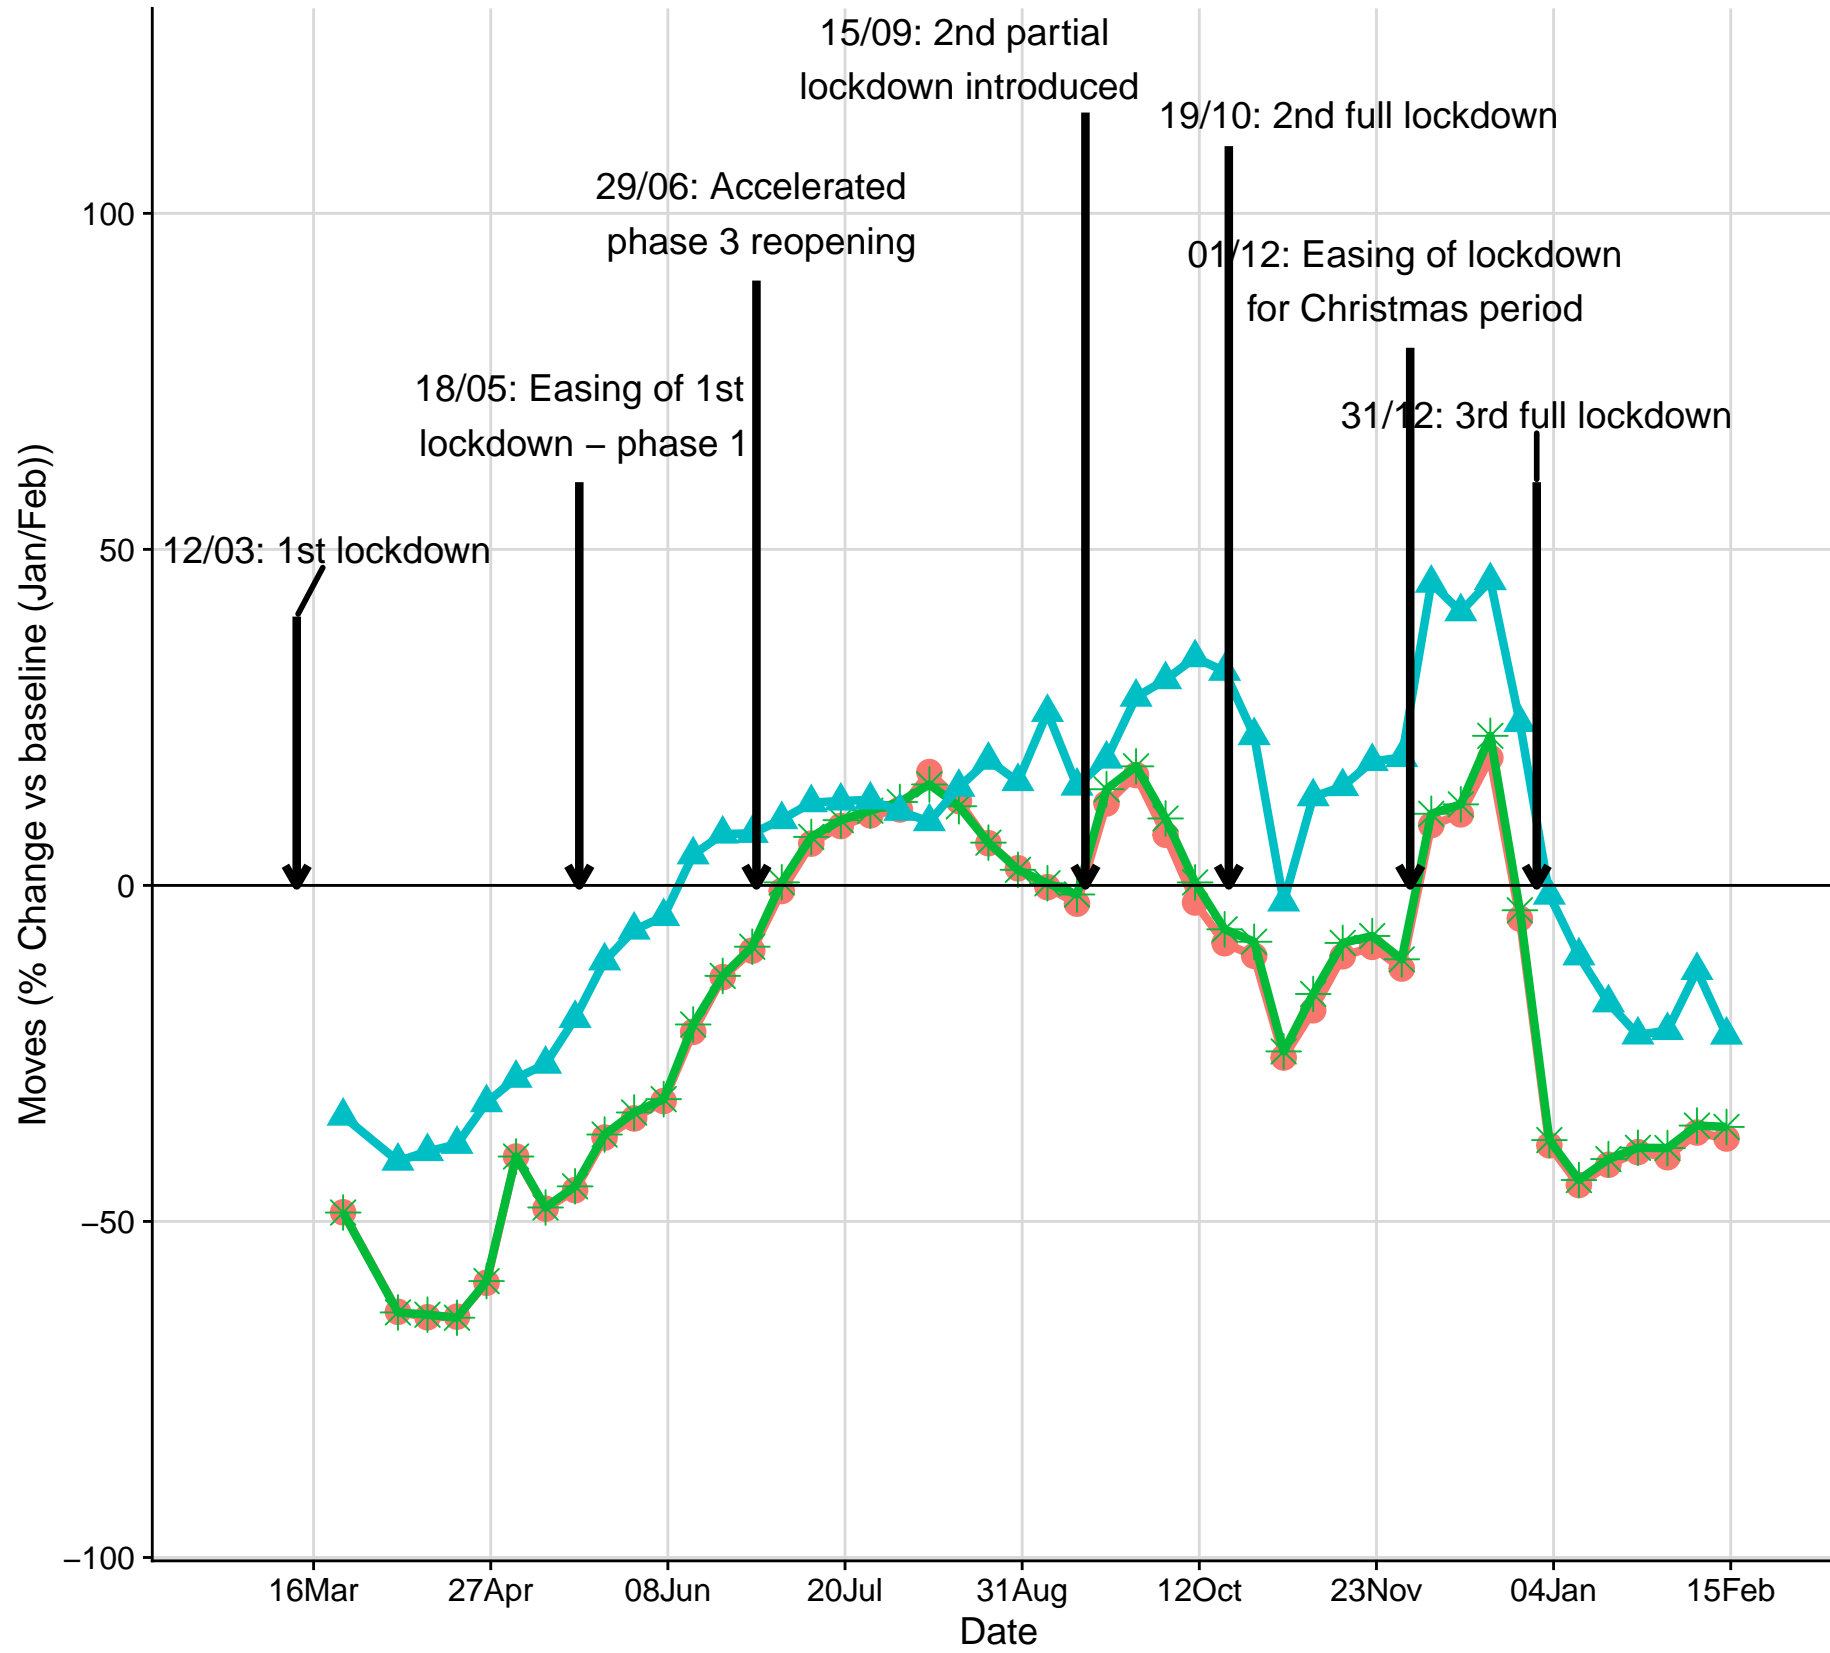

## Longford

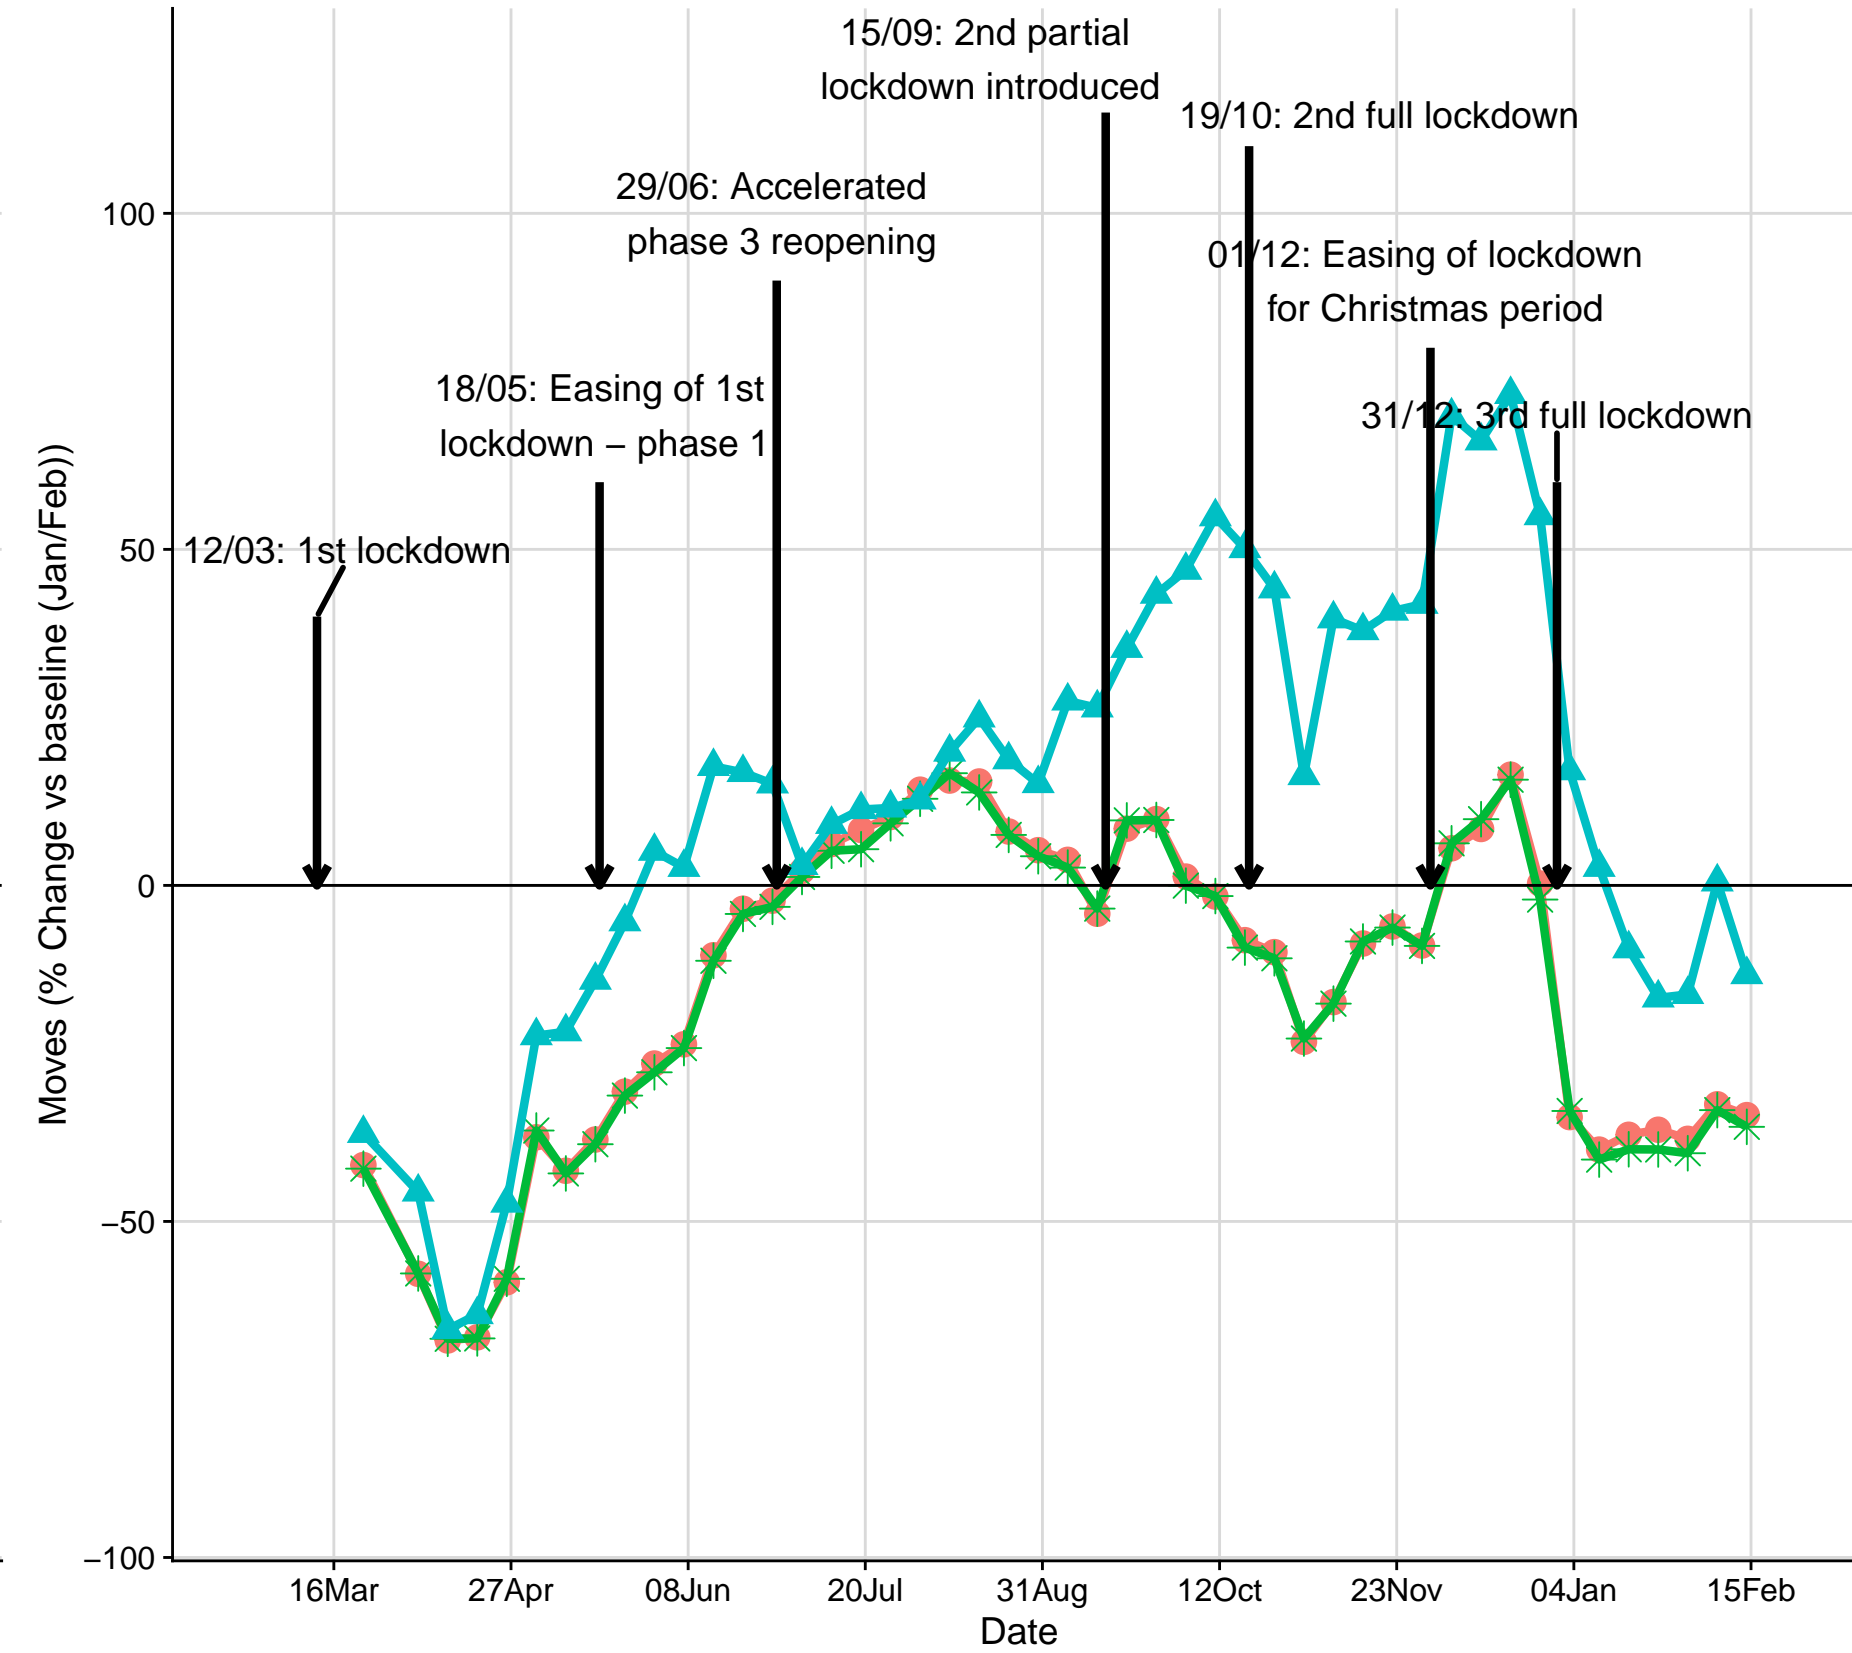

Movement type ● Movements into county \* Movements out of county ▲ Movements within county

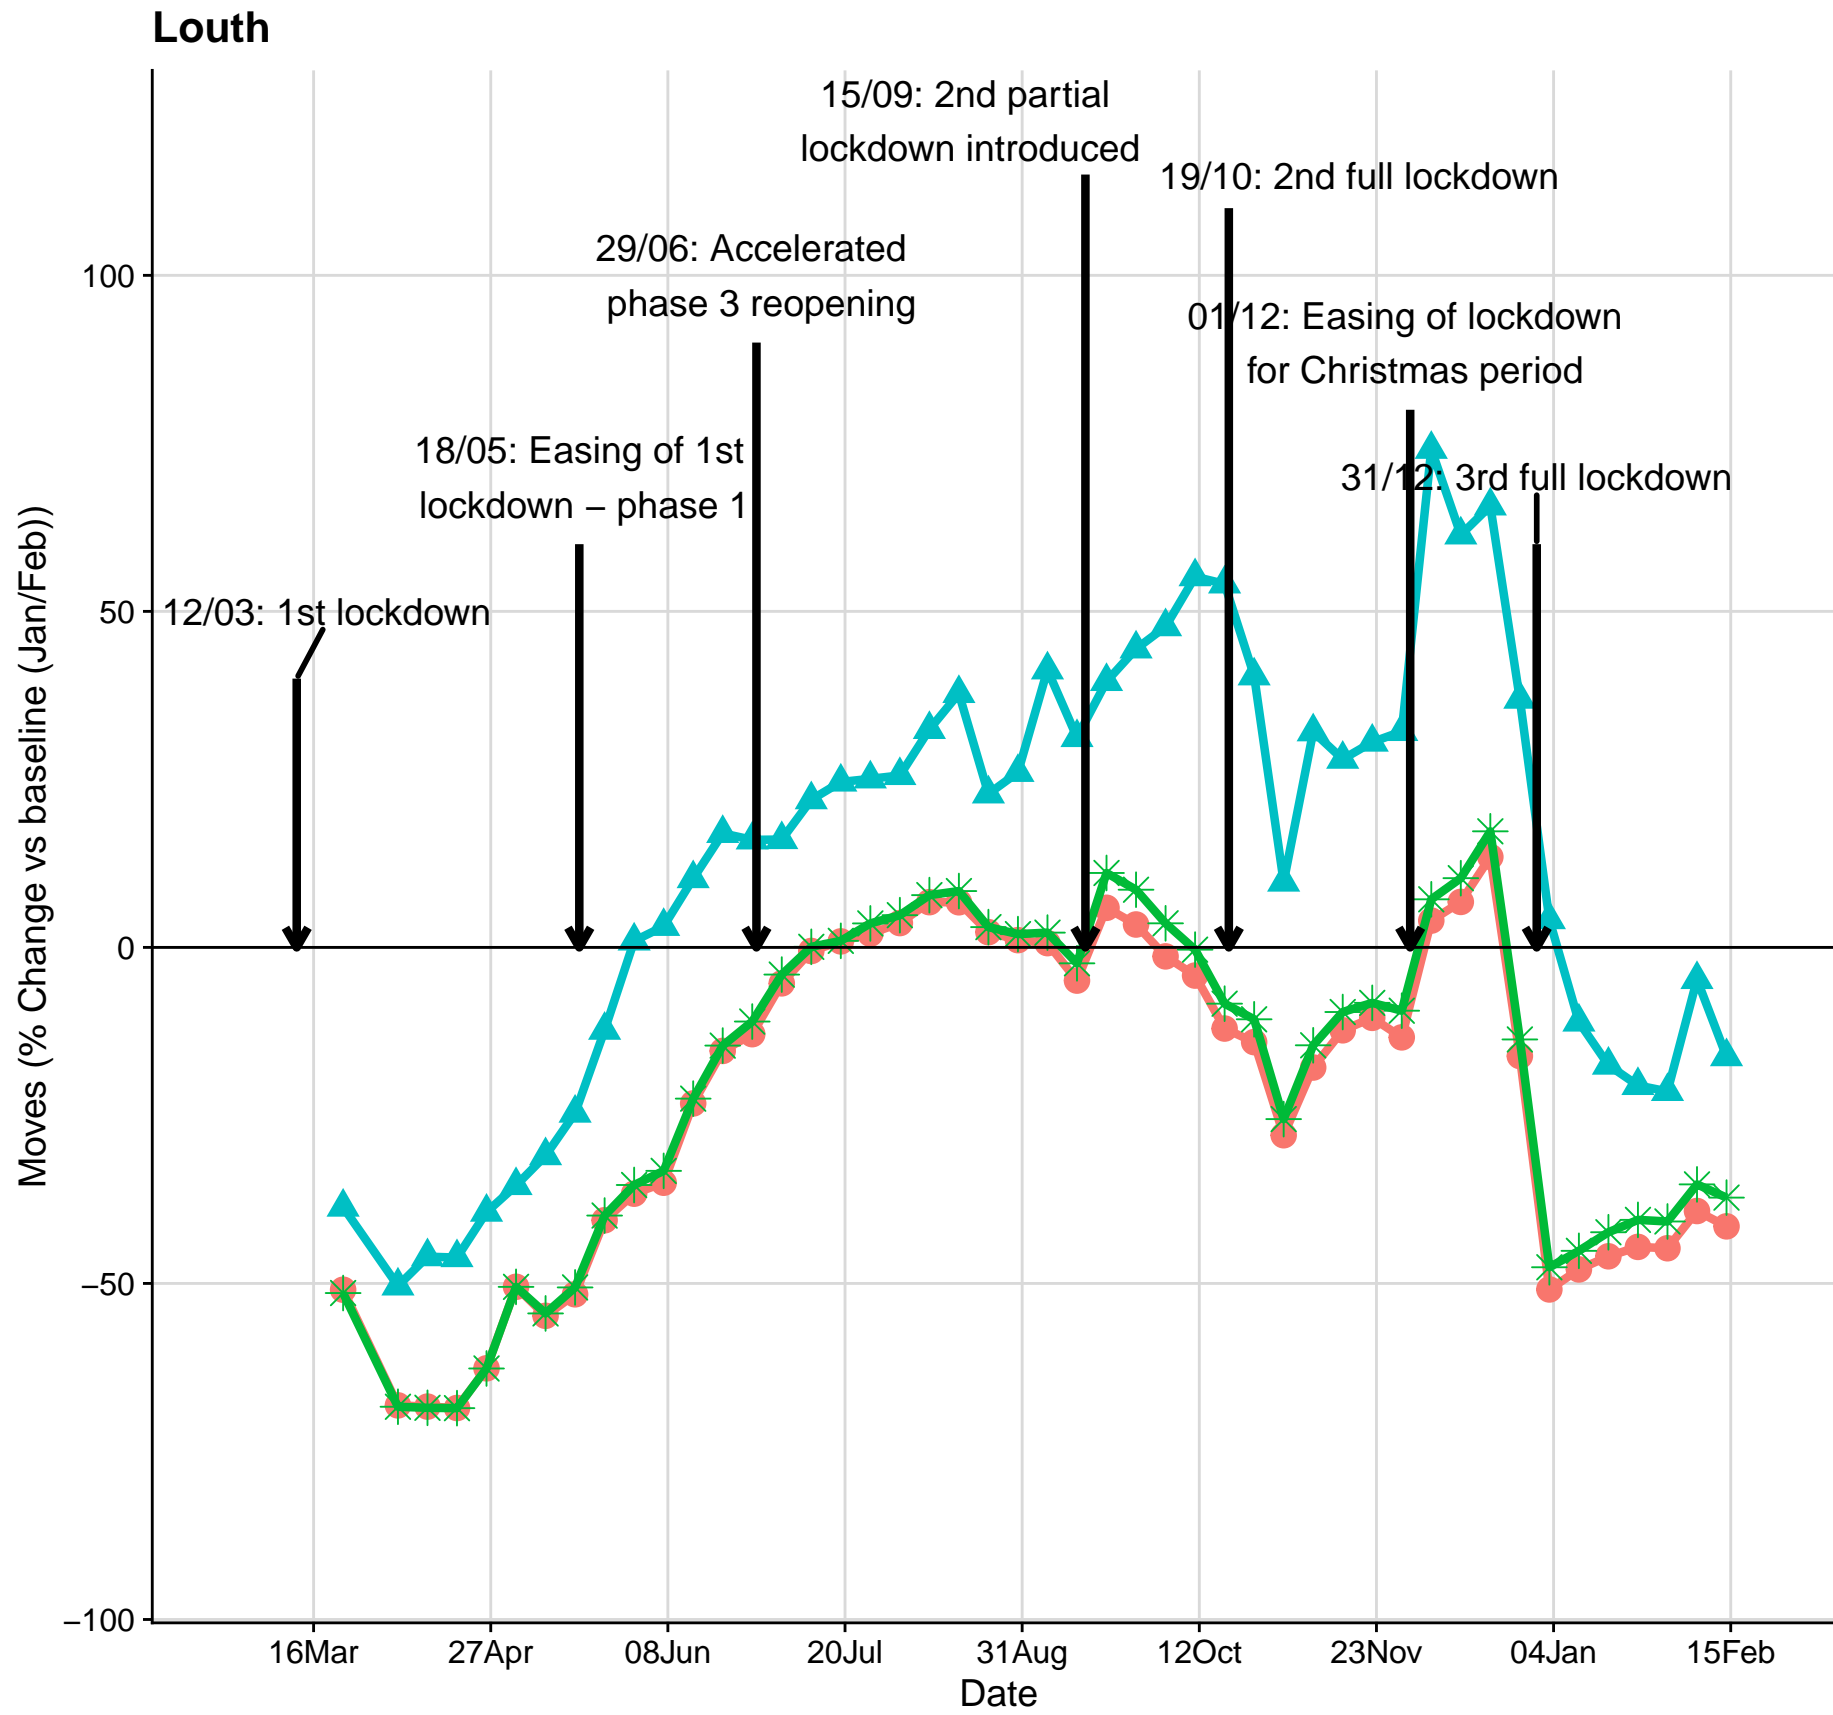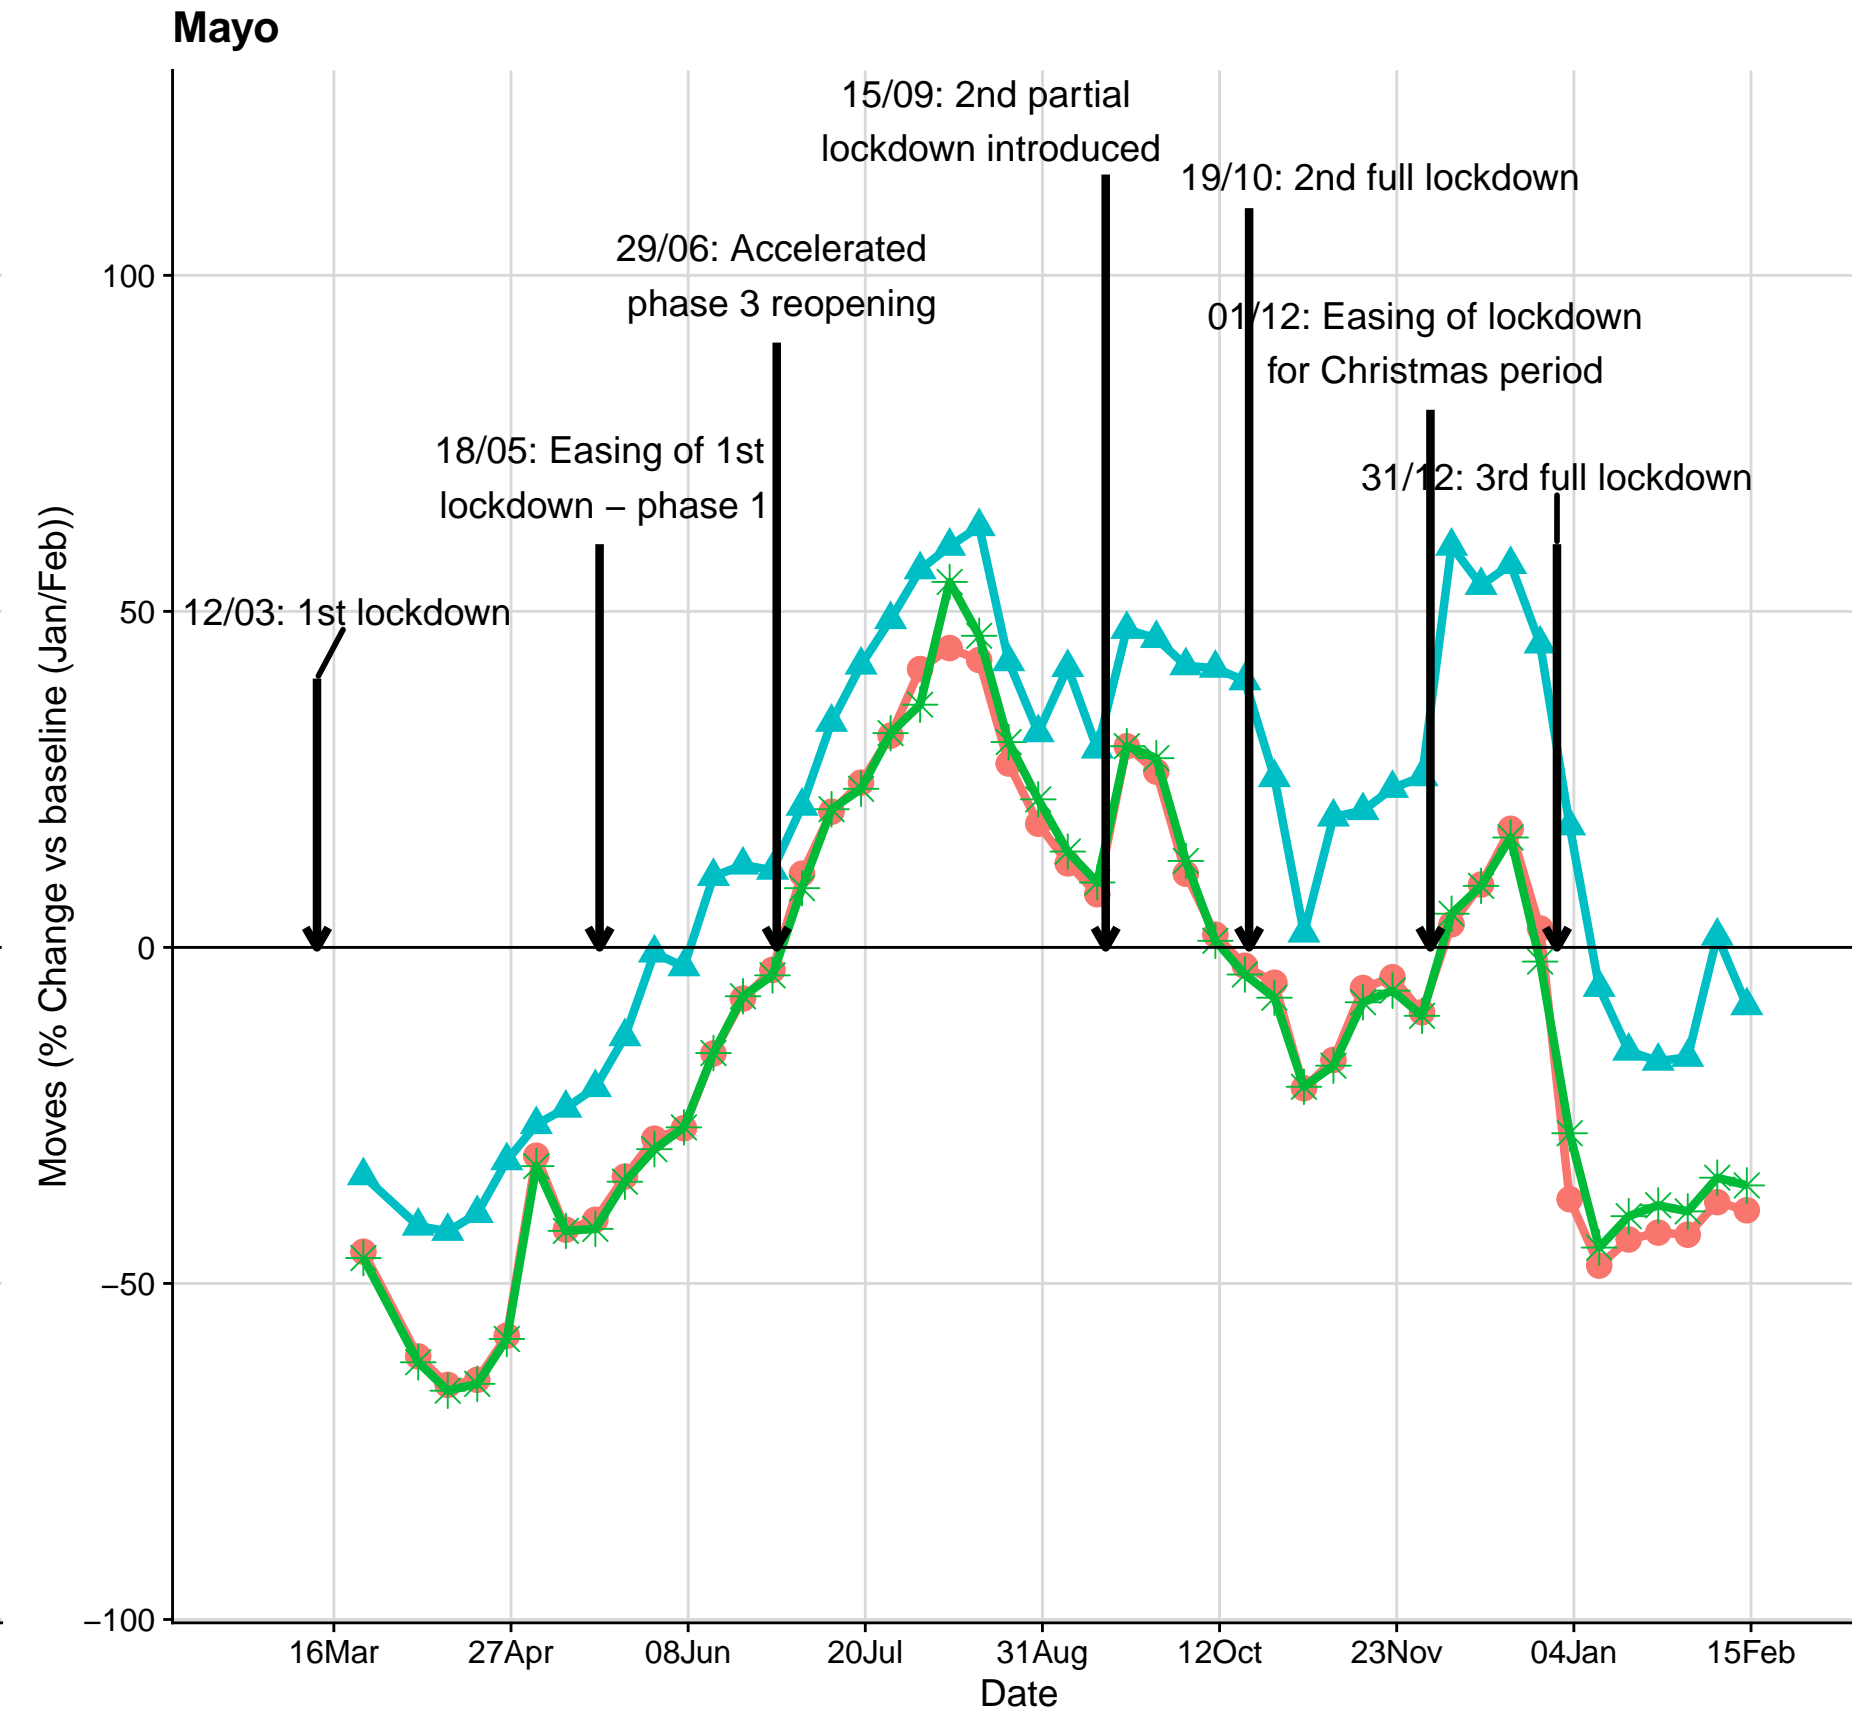

Movement type ● Movements into county \* Movements out of county ▲ Movements within county

**Meath**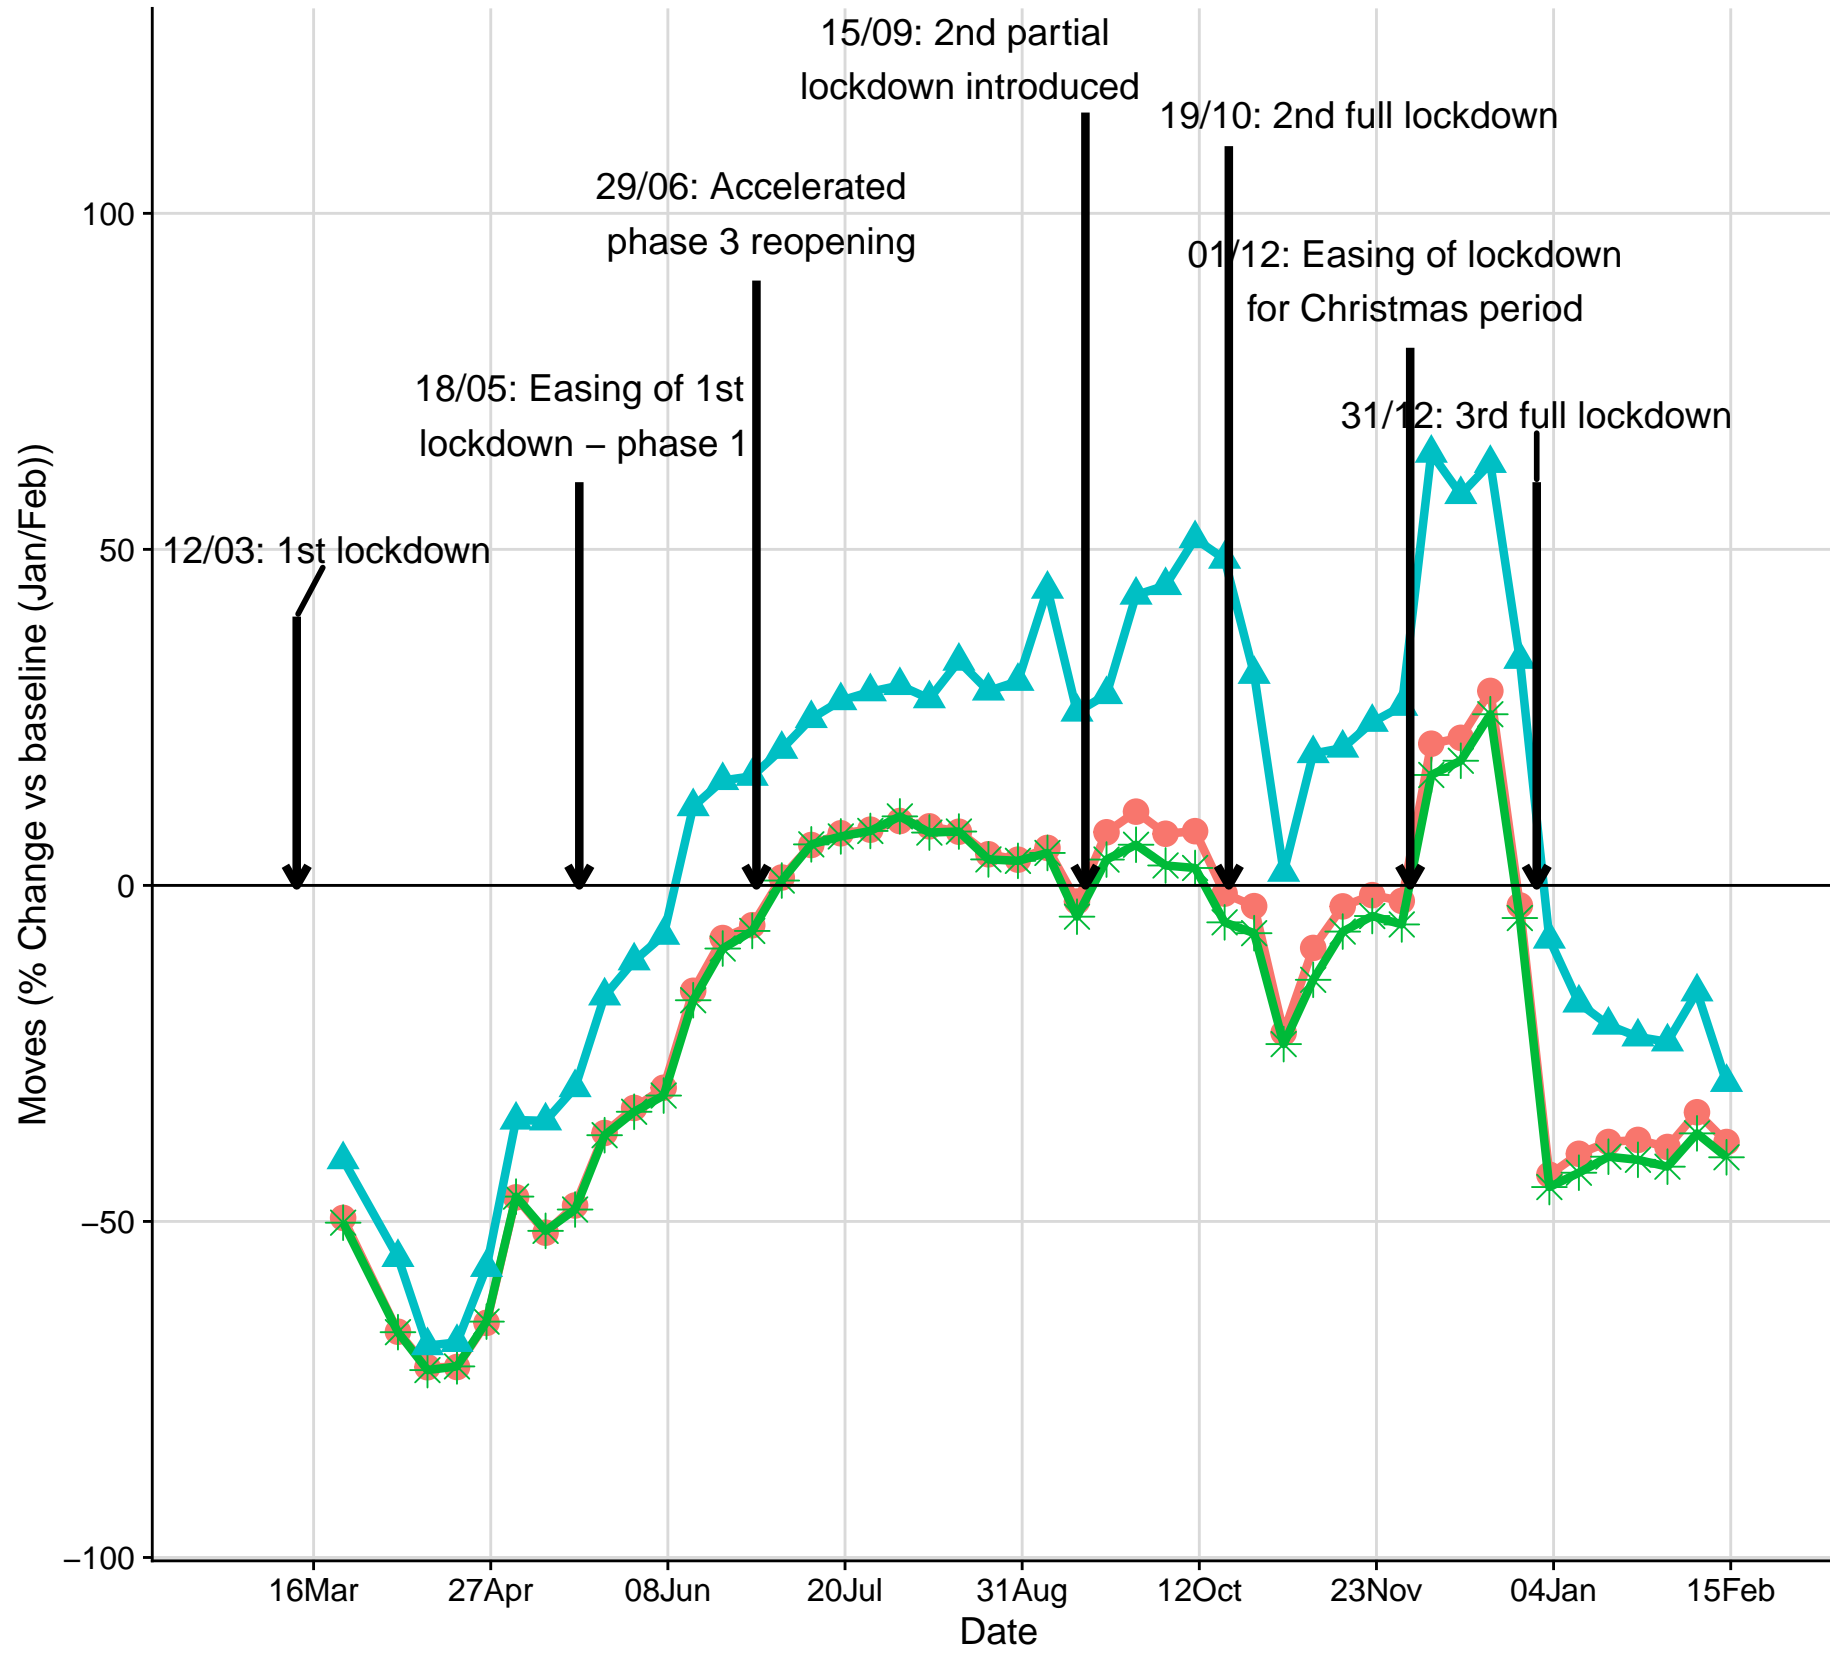**Monaghan**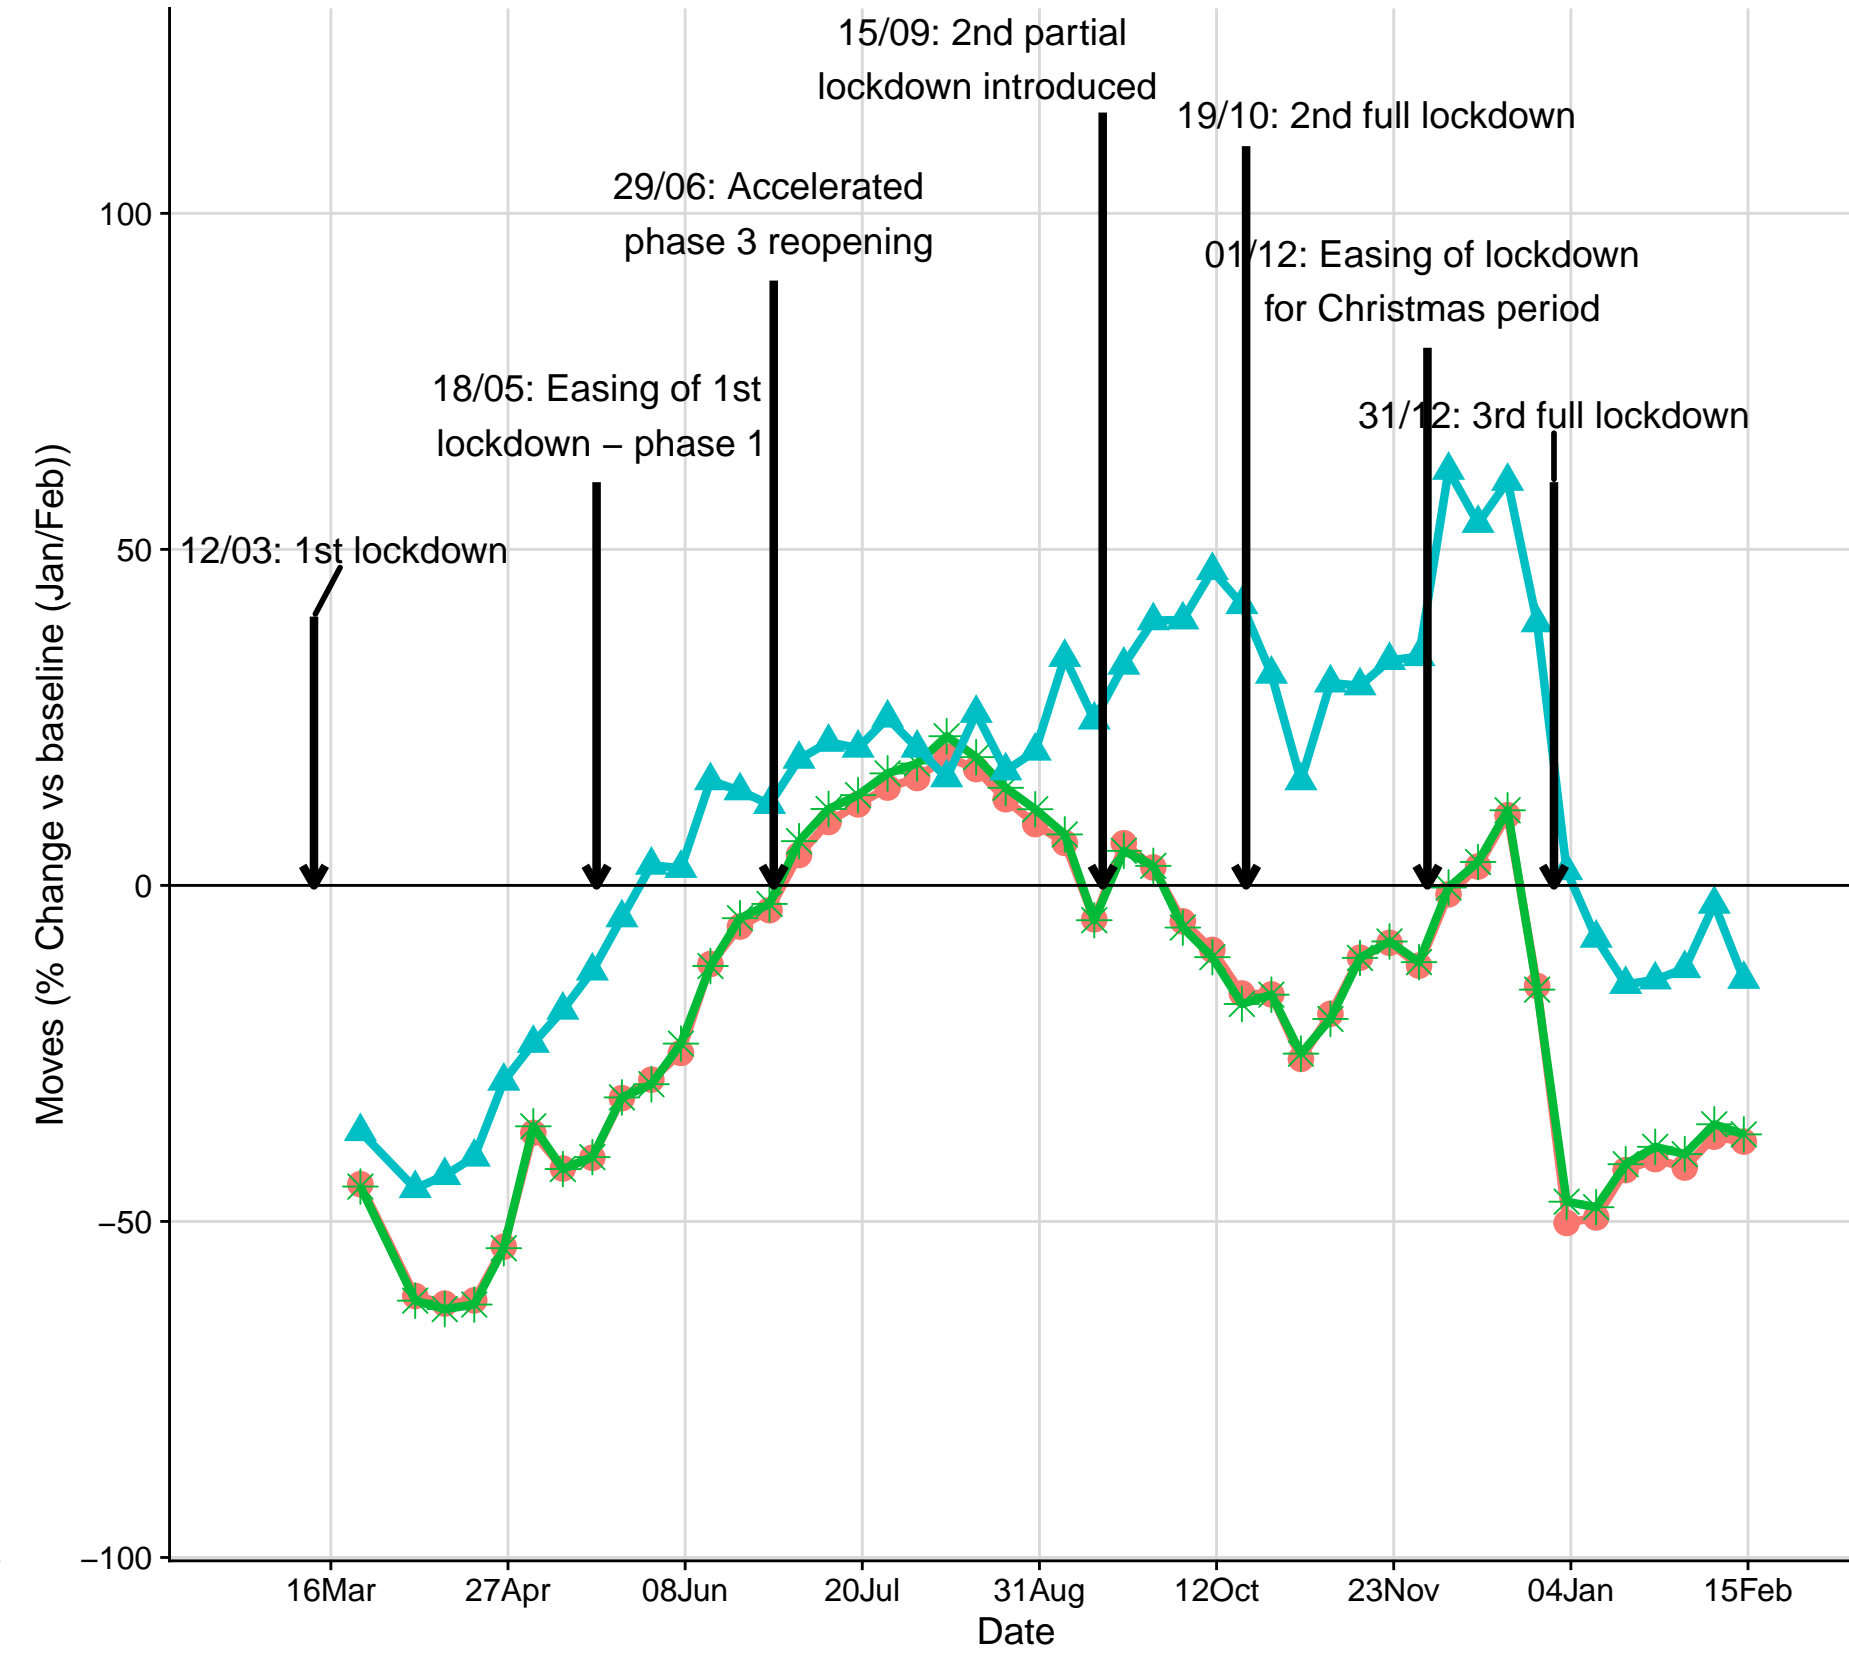

Movement type ● Movements into county \* Movements out of county ▲ Movements within county

## Offaly

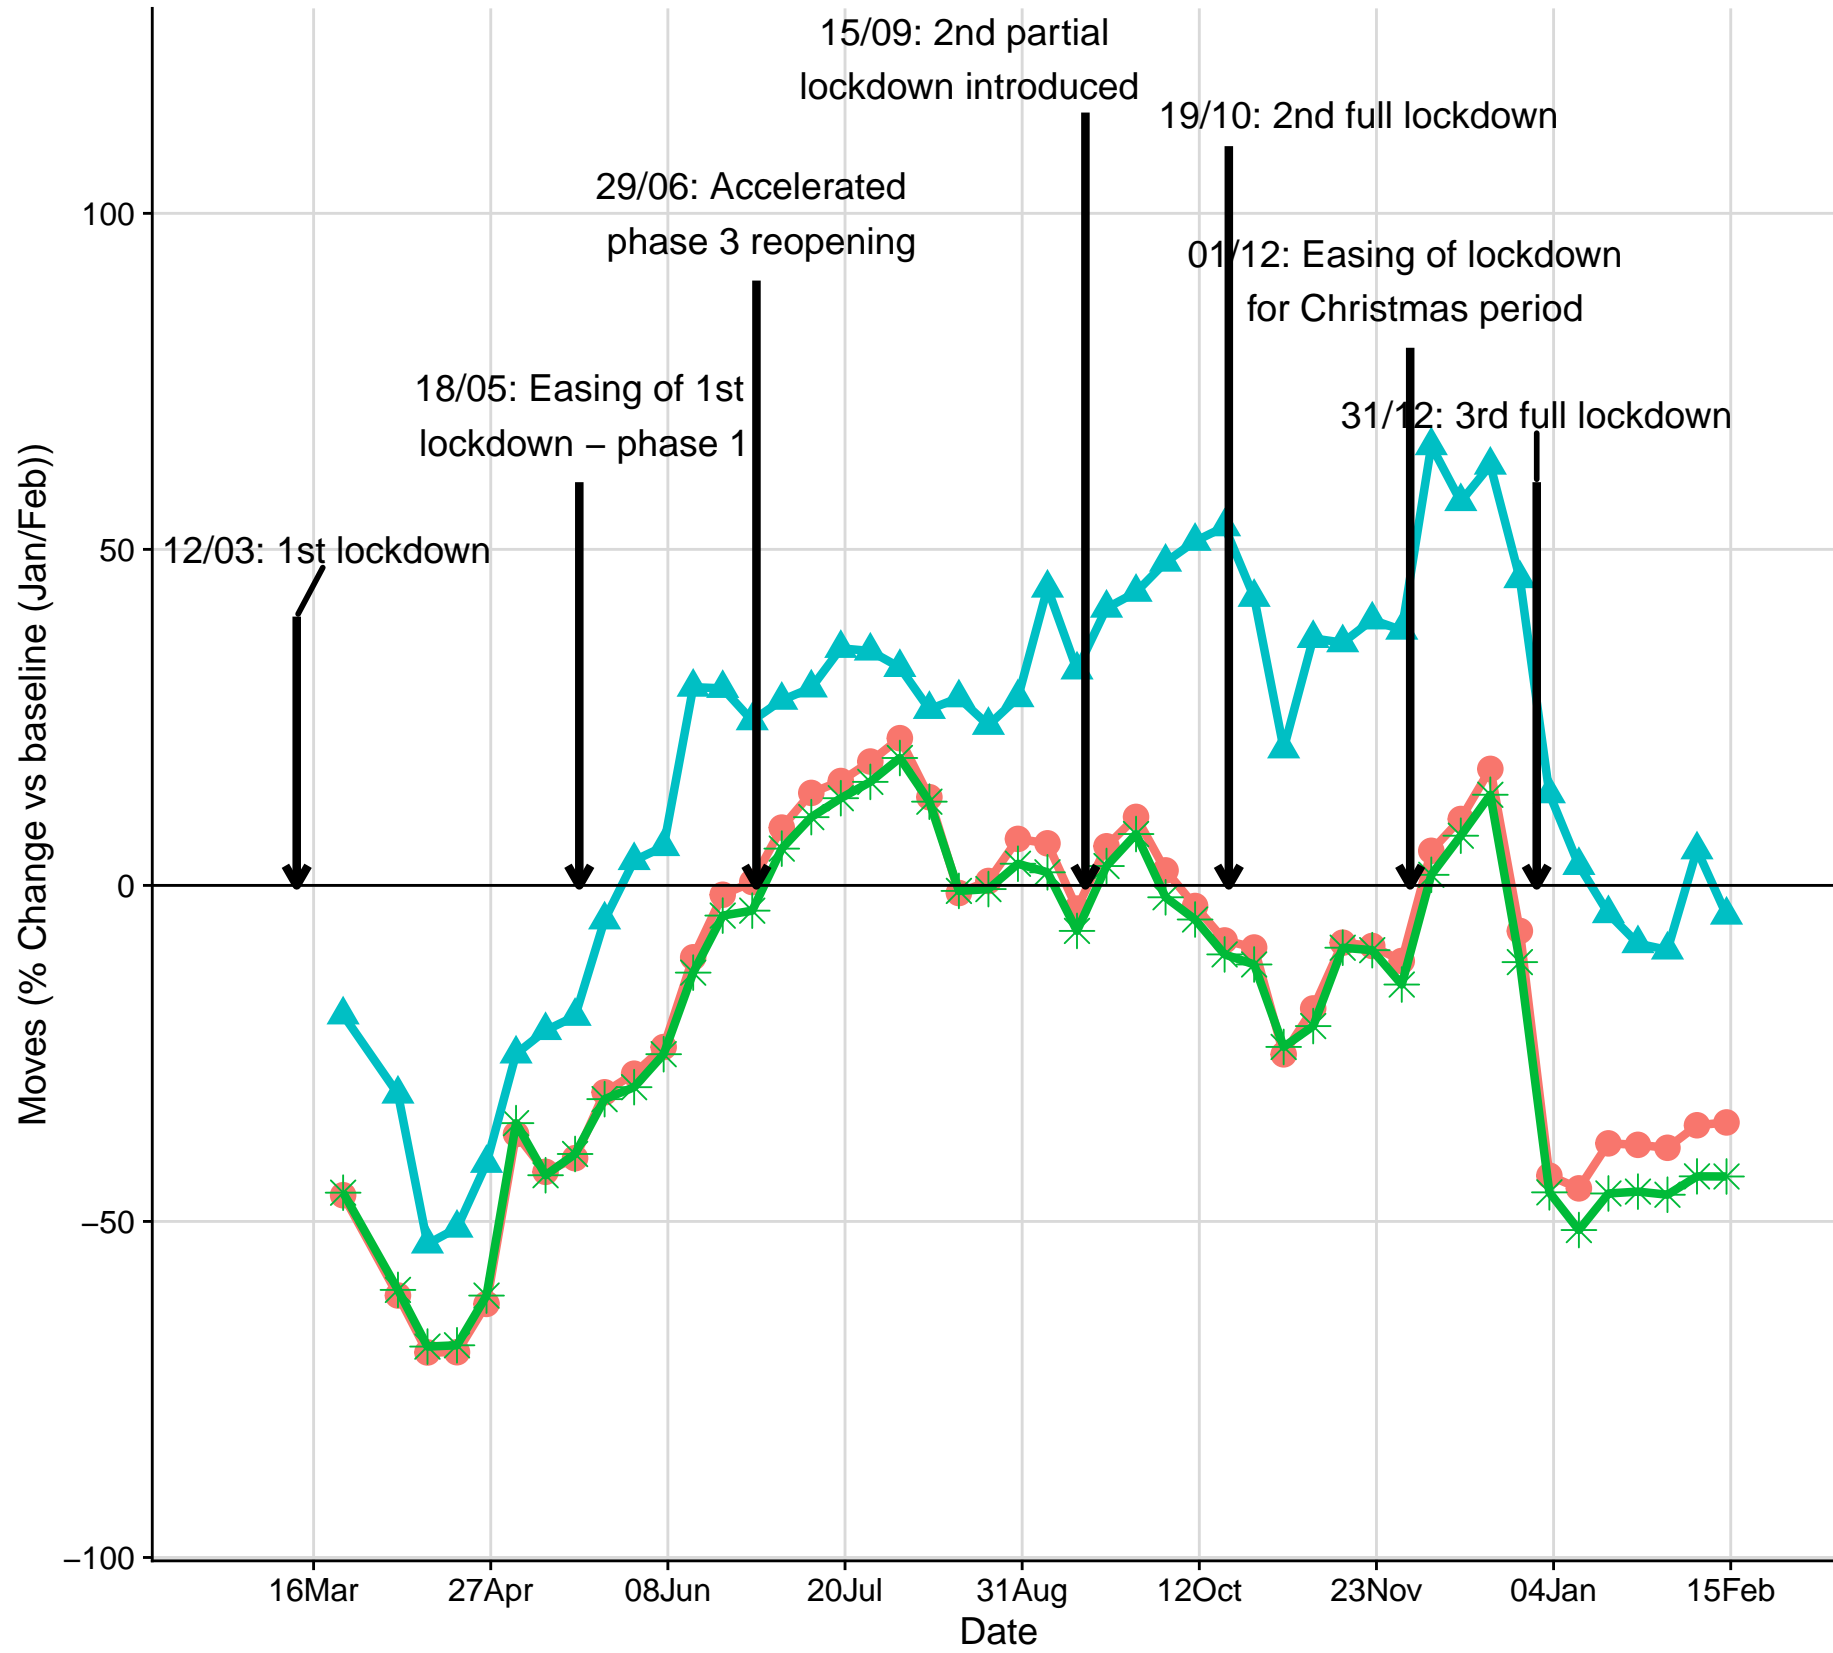

## Roscommon

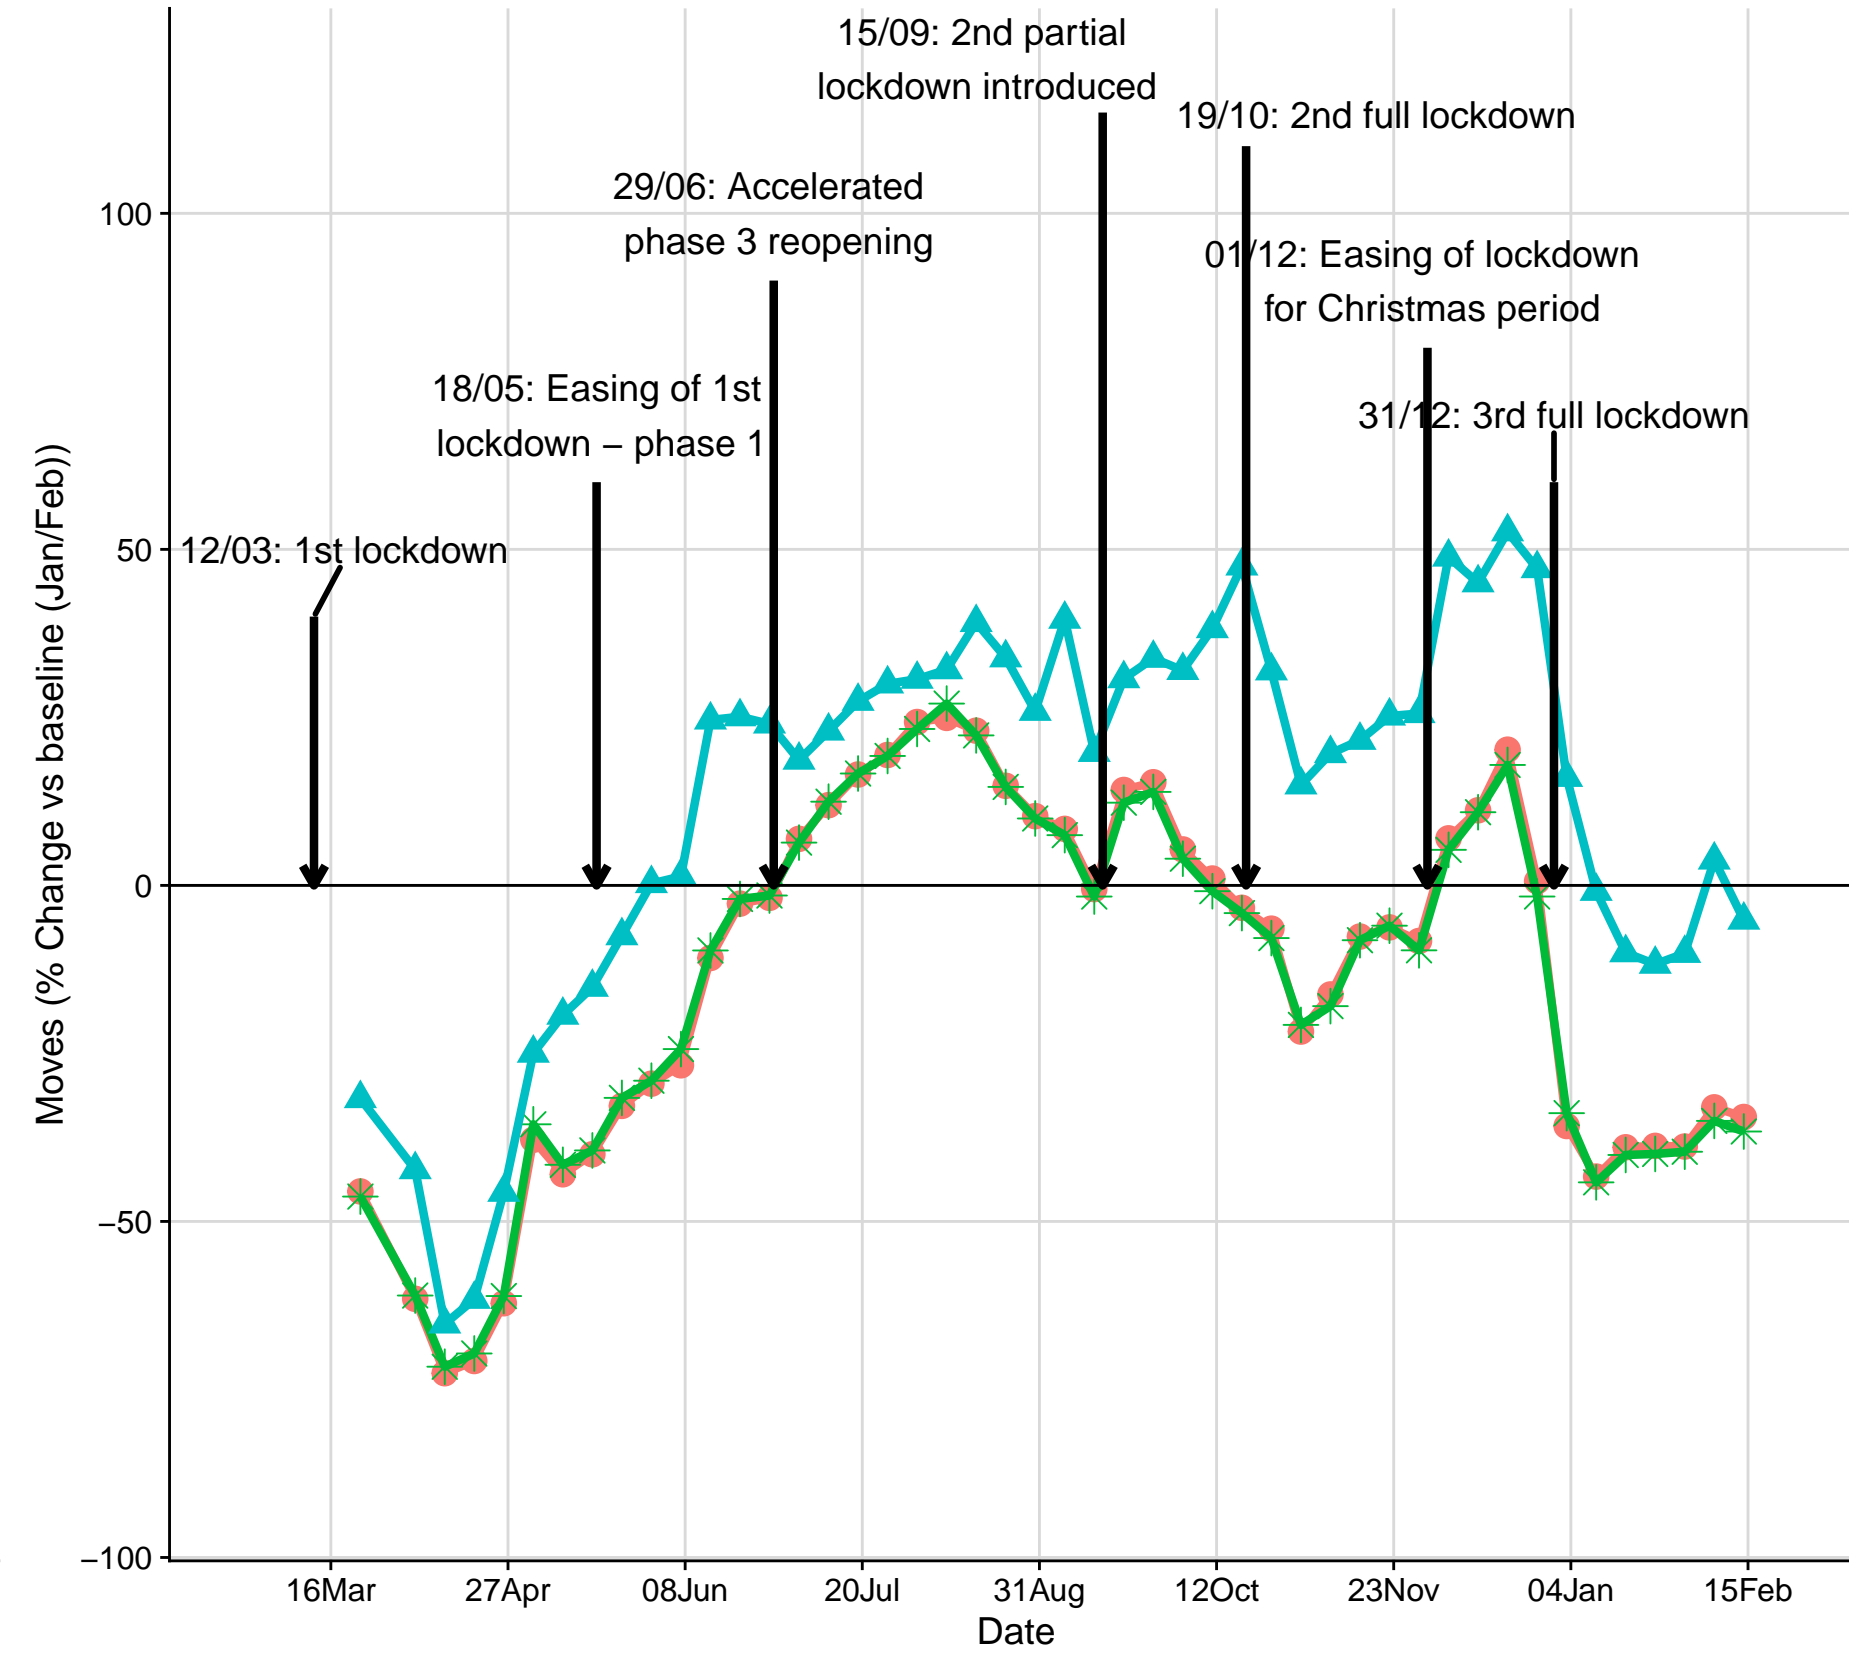

Movement type ● Movements into county \* Movements out of county ▲ Movements within county

## Sligo

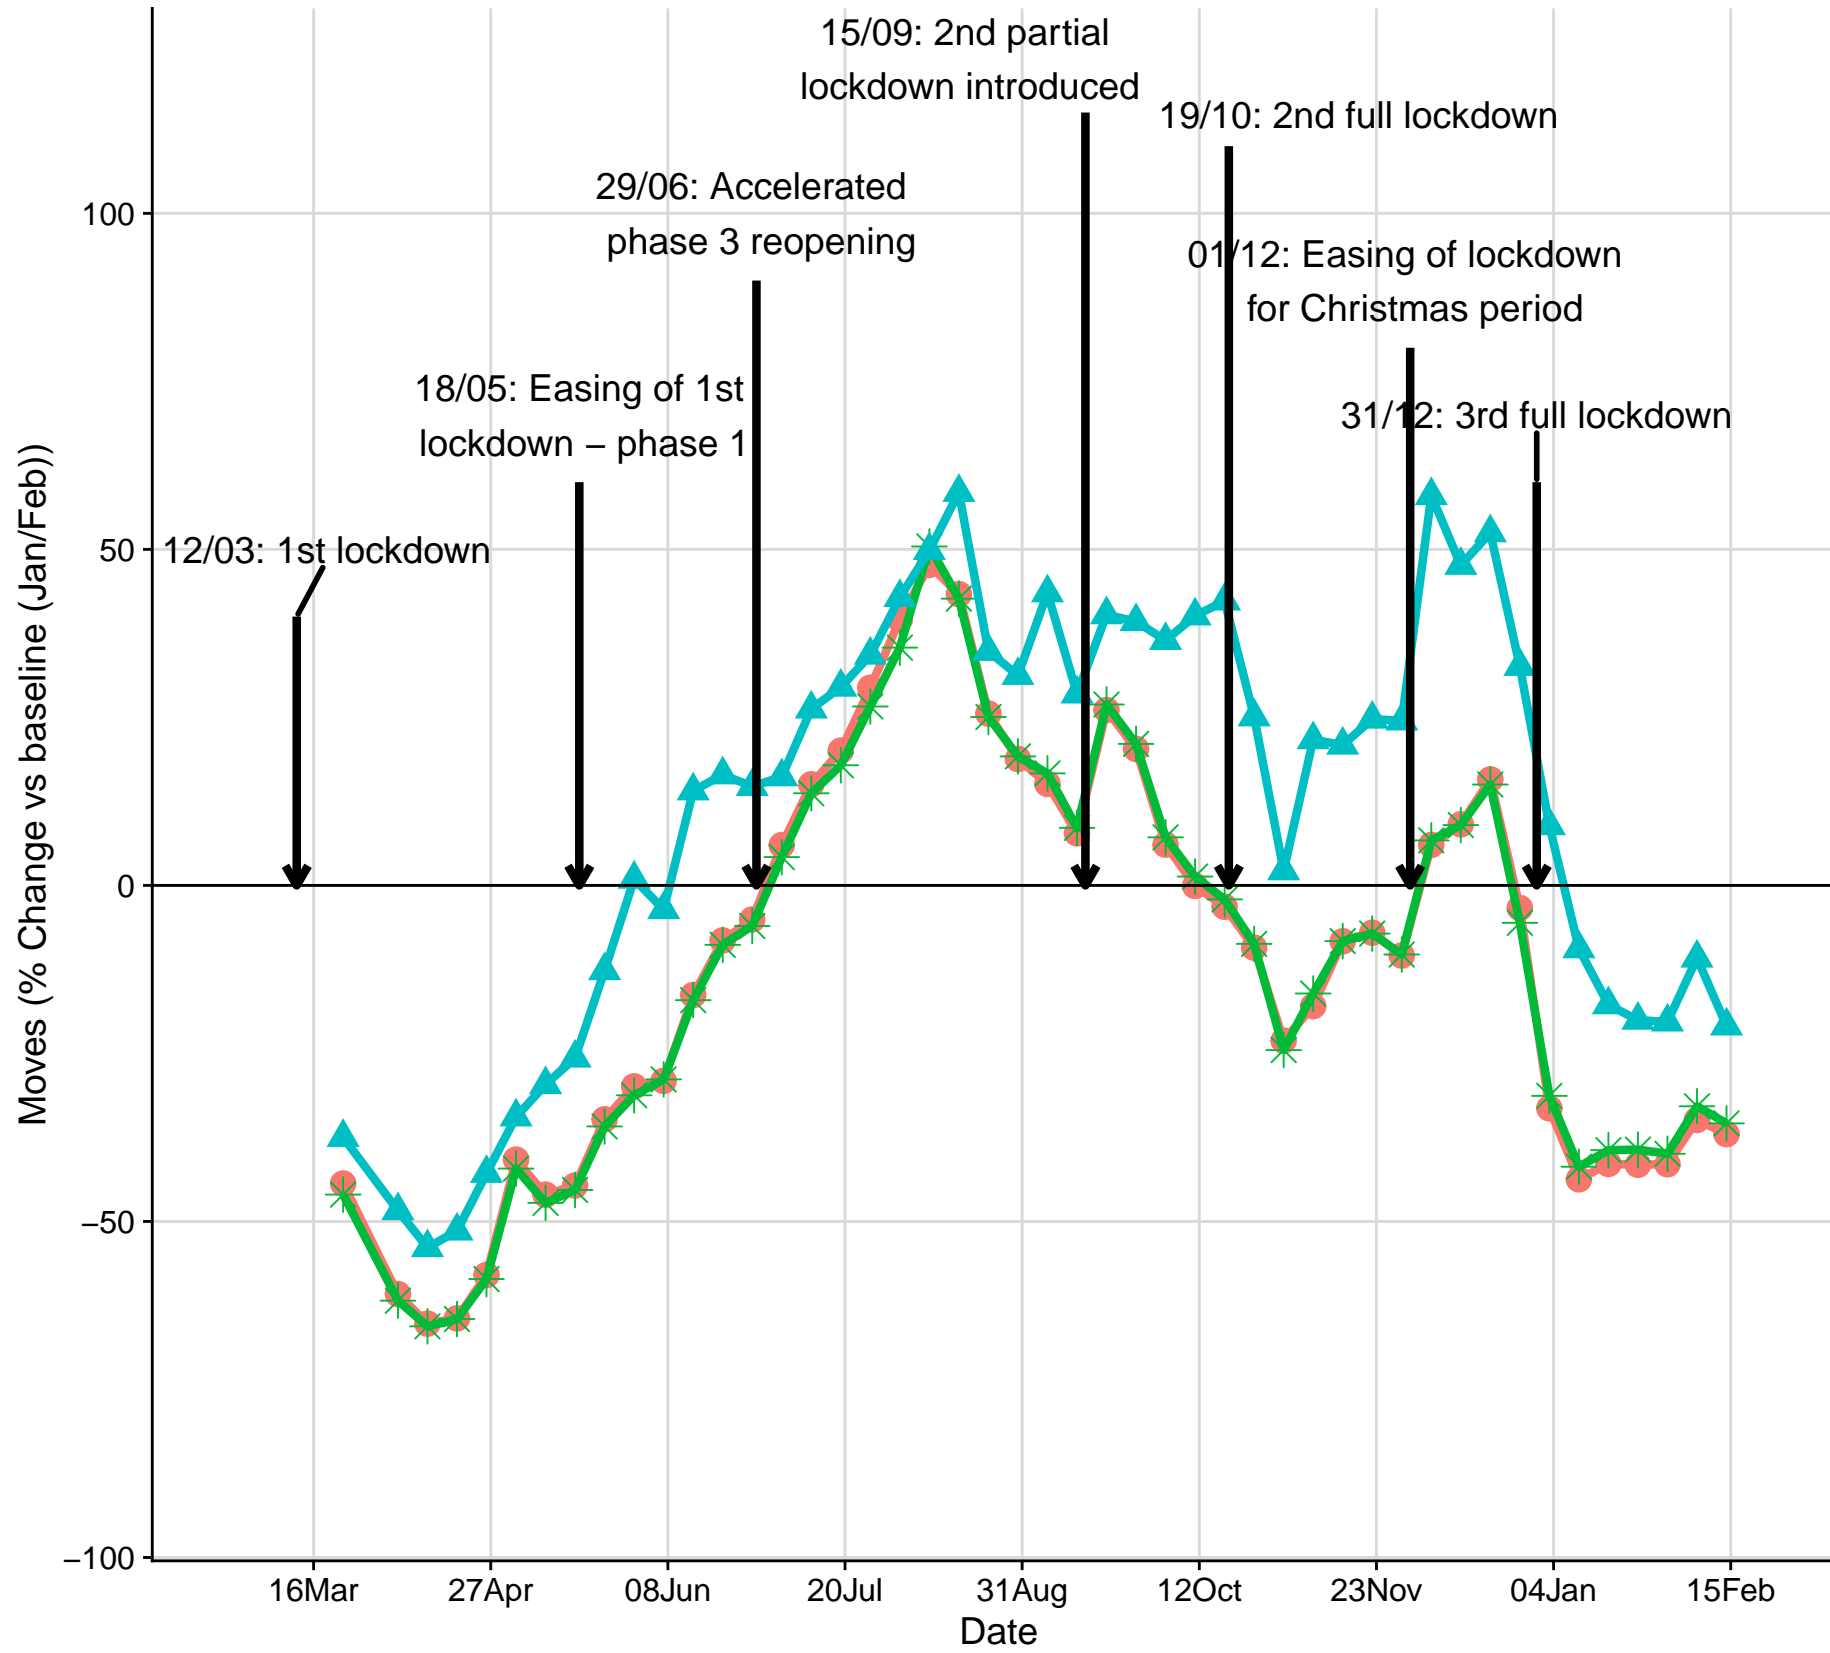

## Tipperary

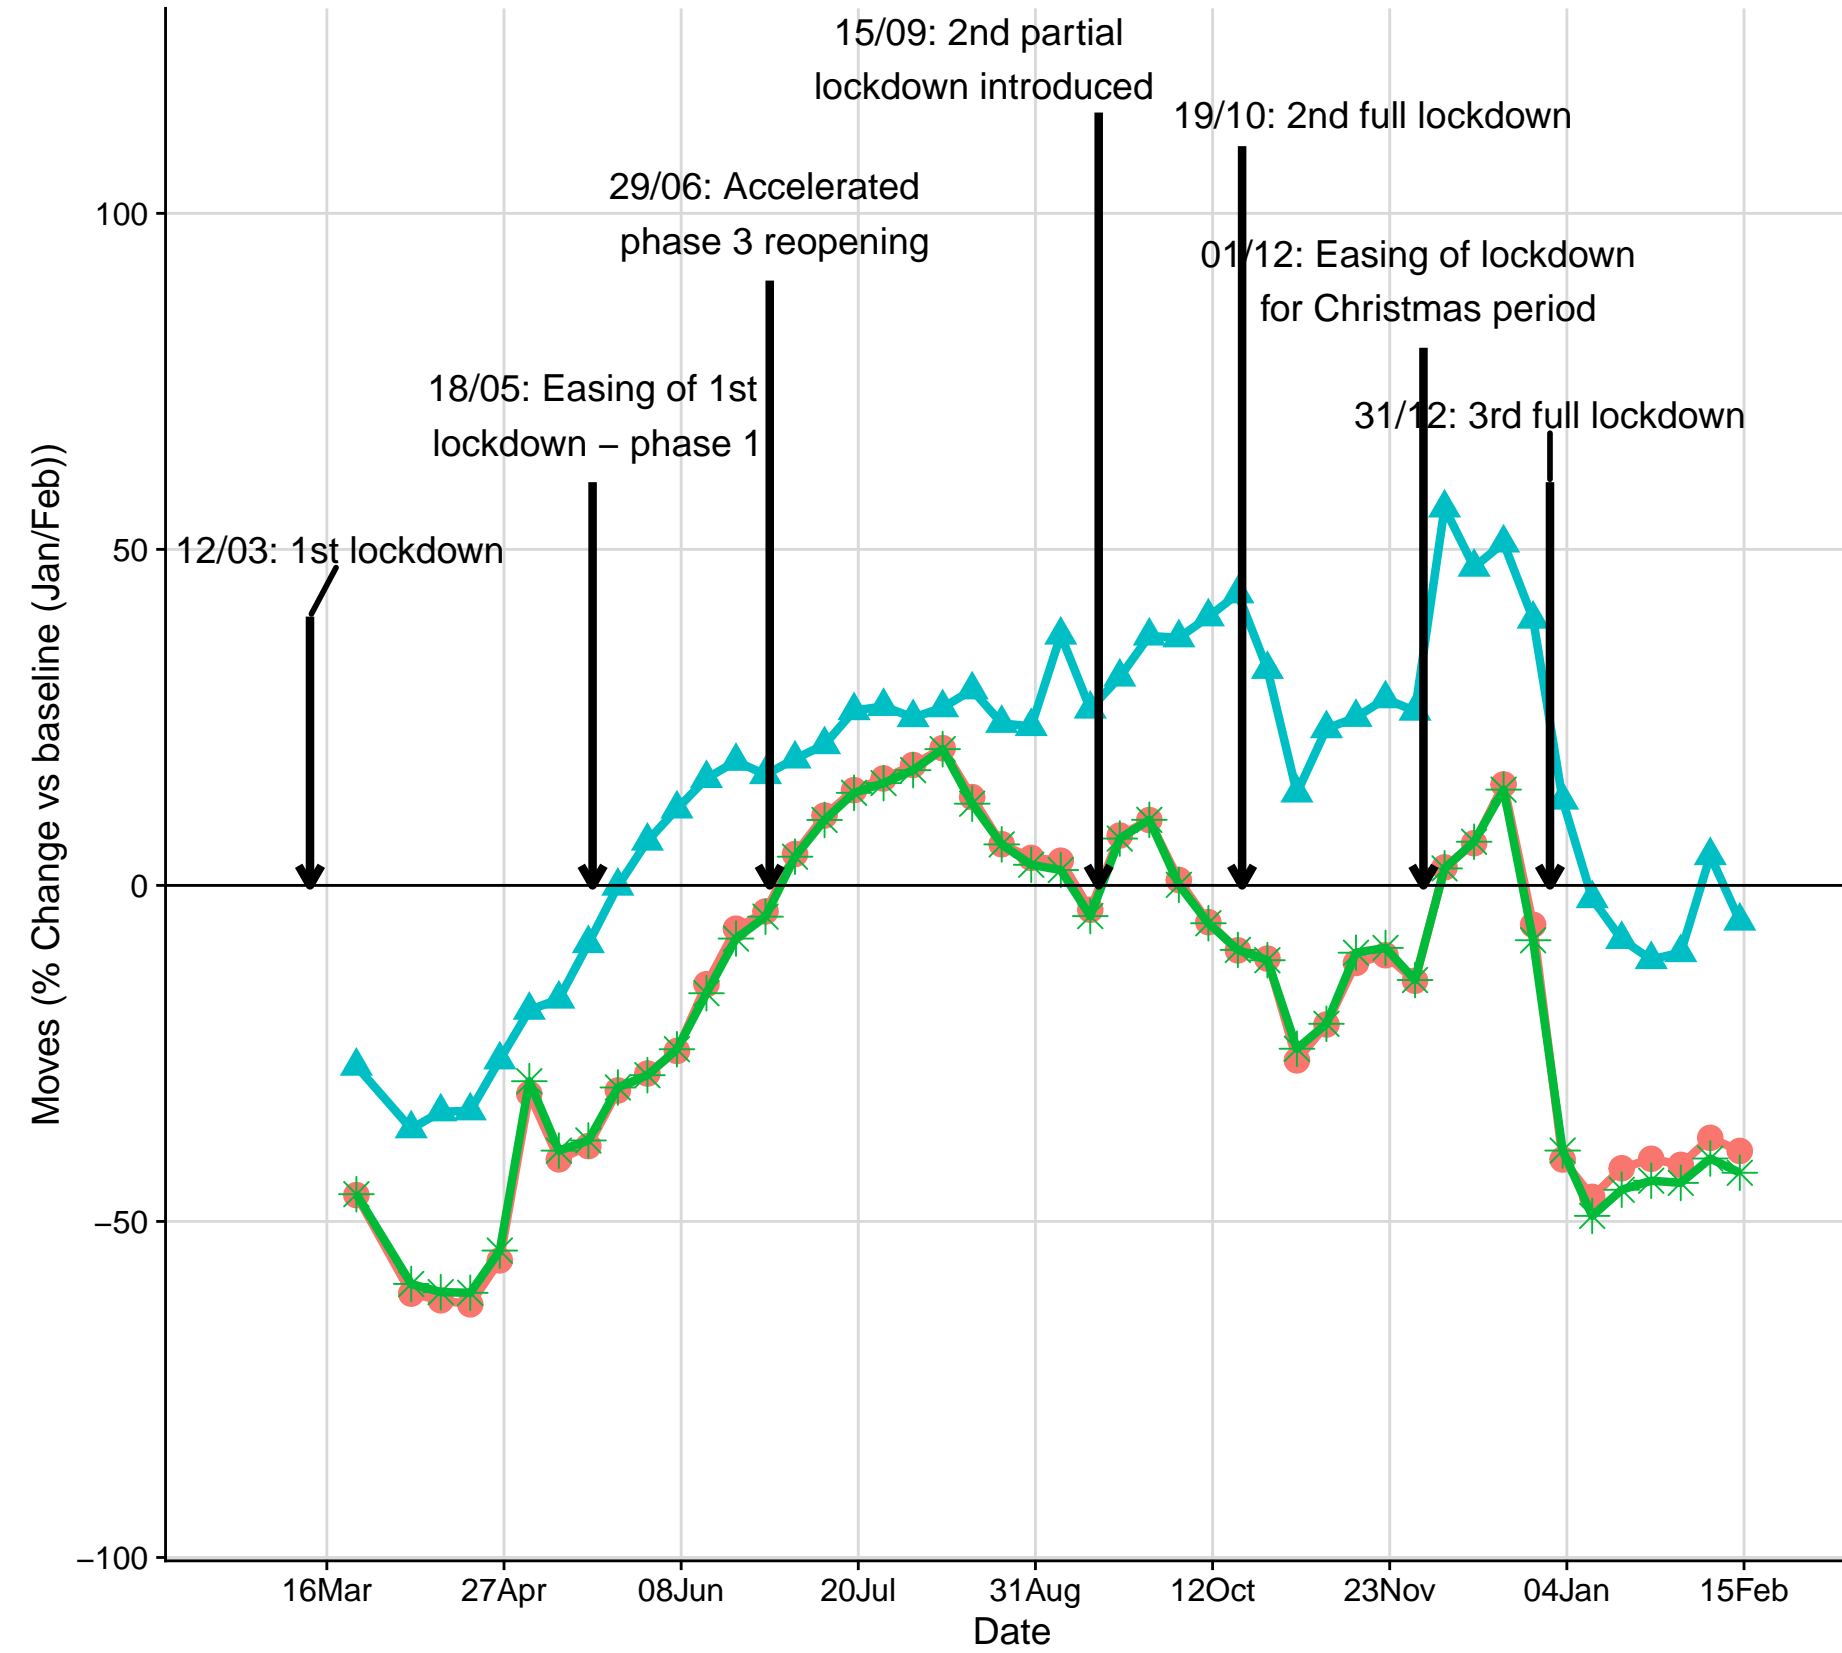

Movement type ● Movements into county \* Movements out of county ▲ Movements within county

**Waterford**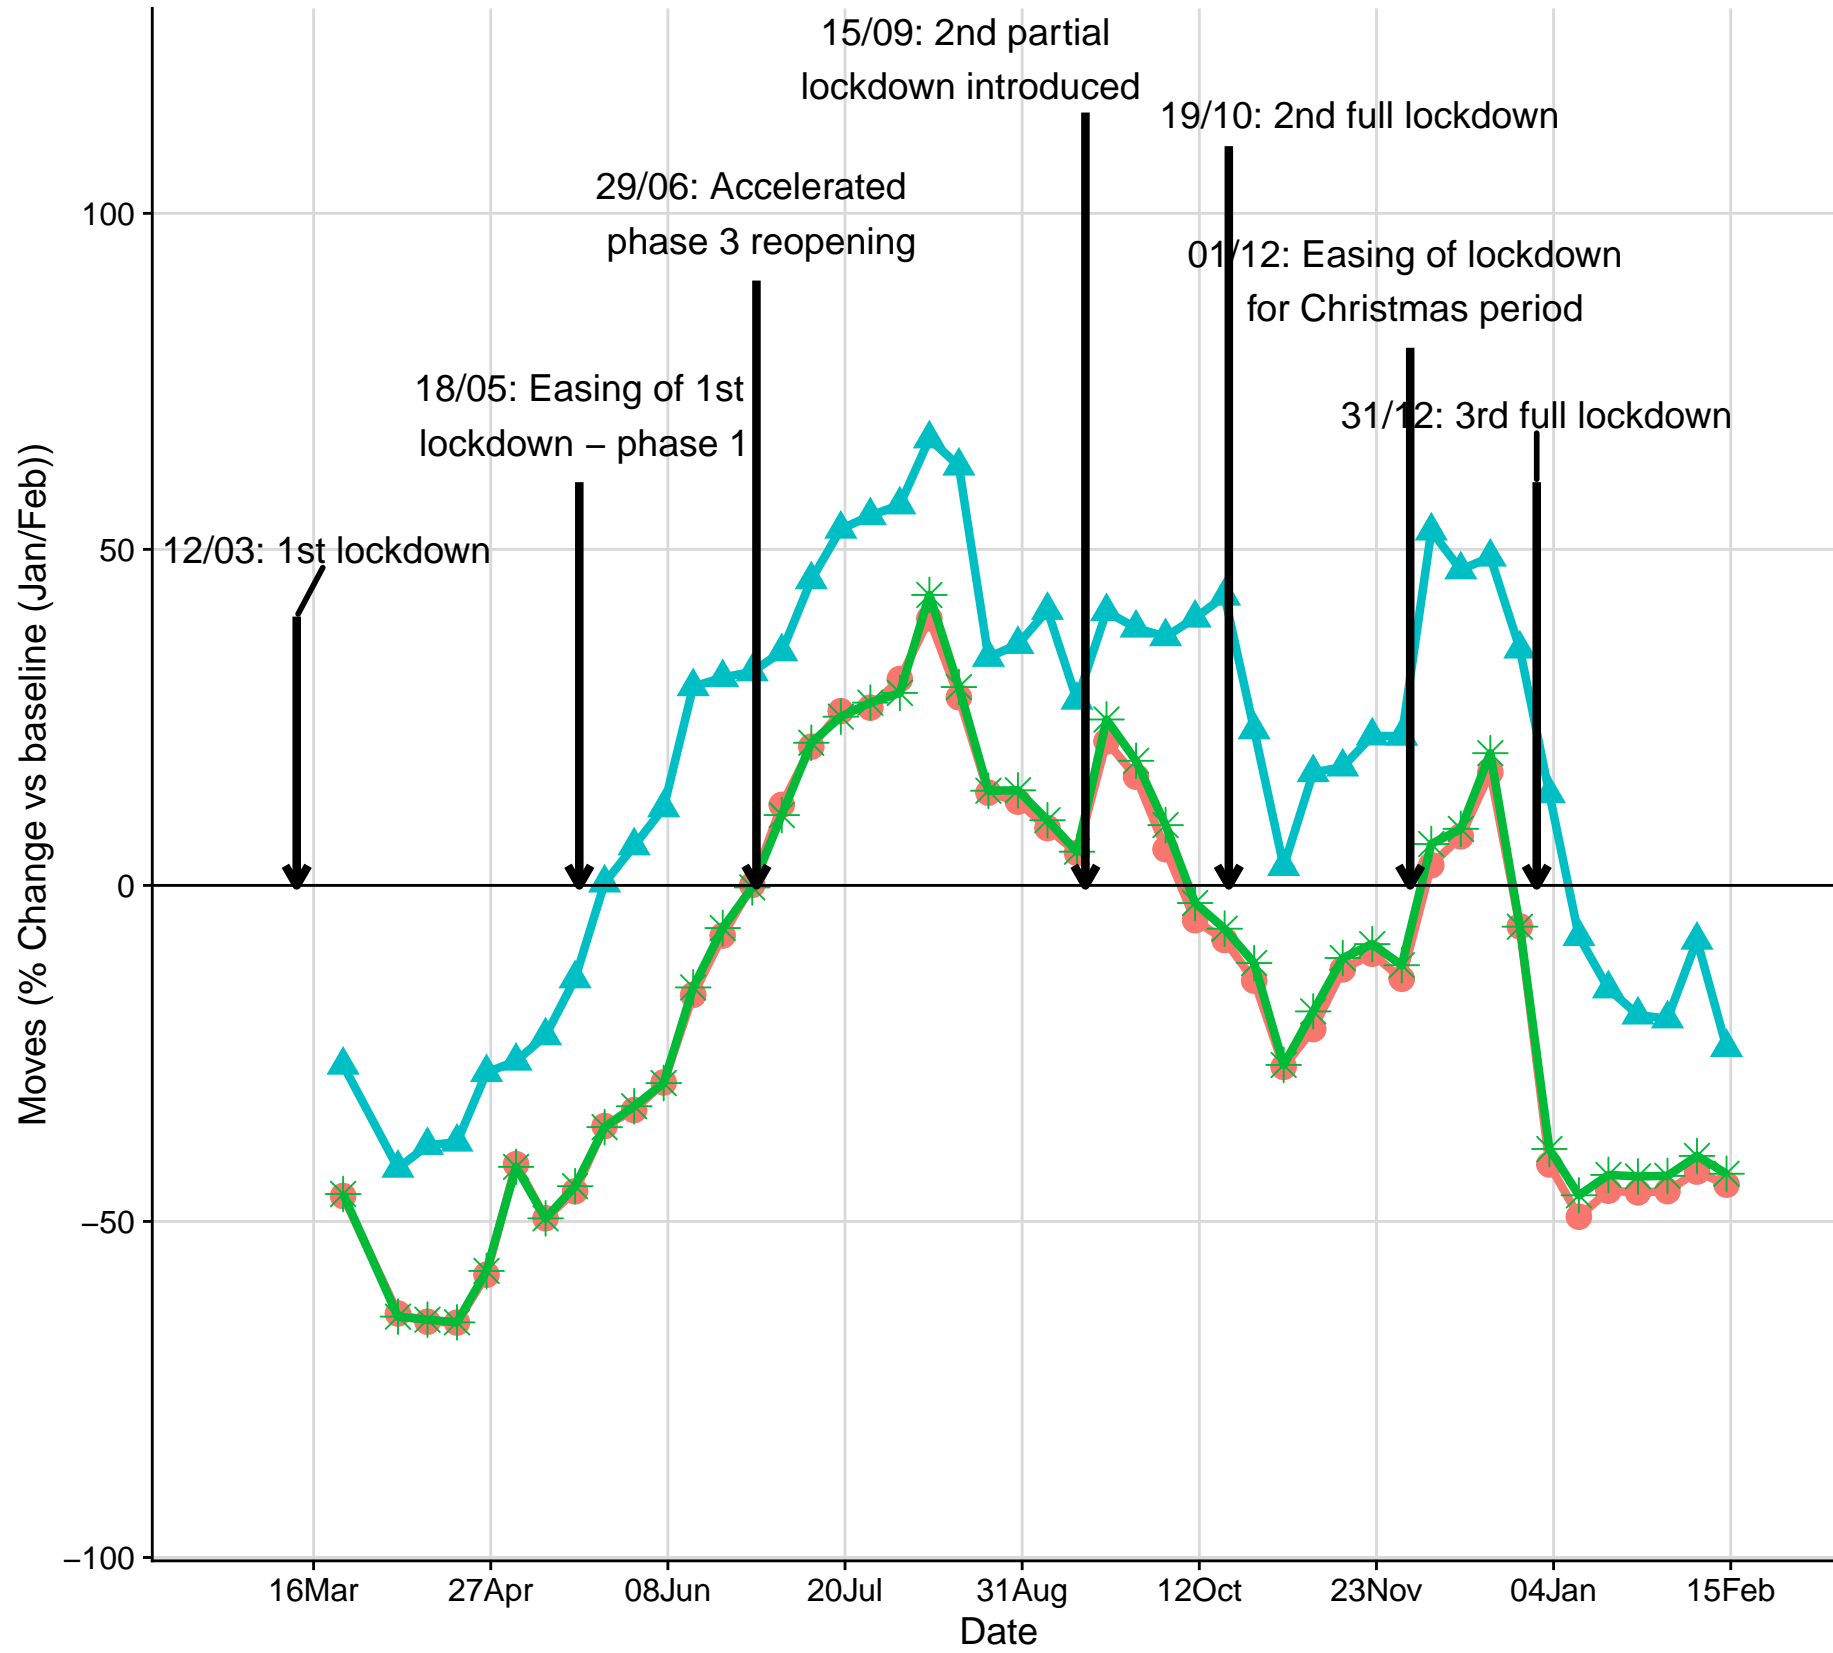**Westmeath**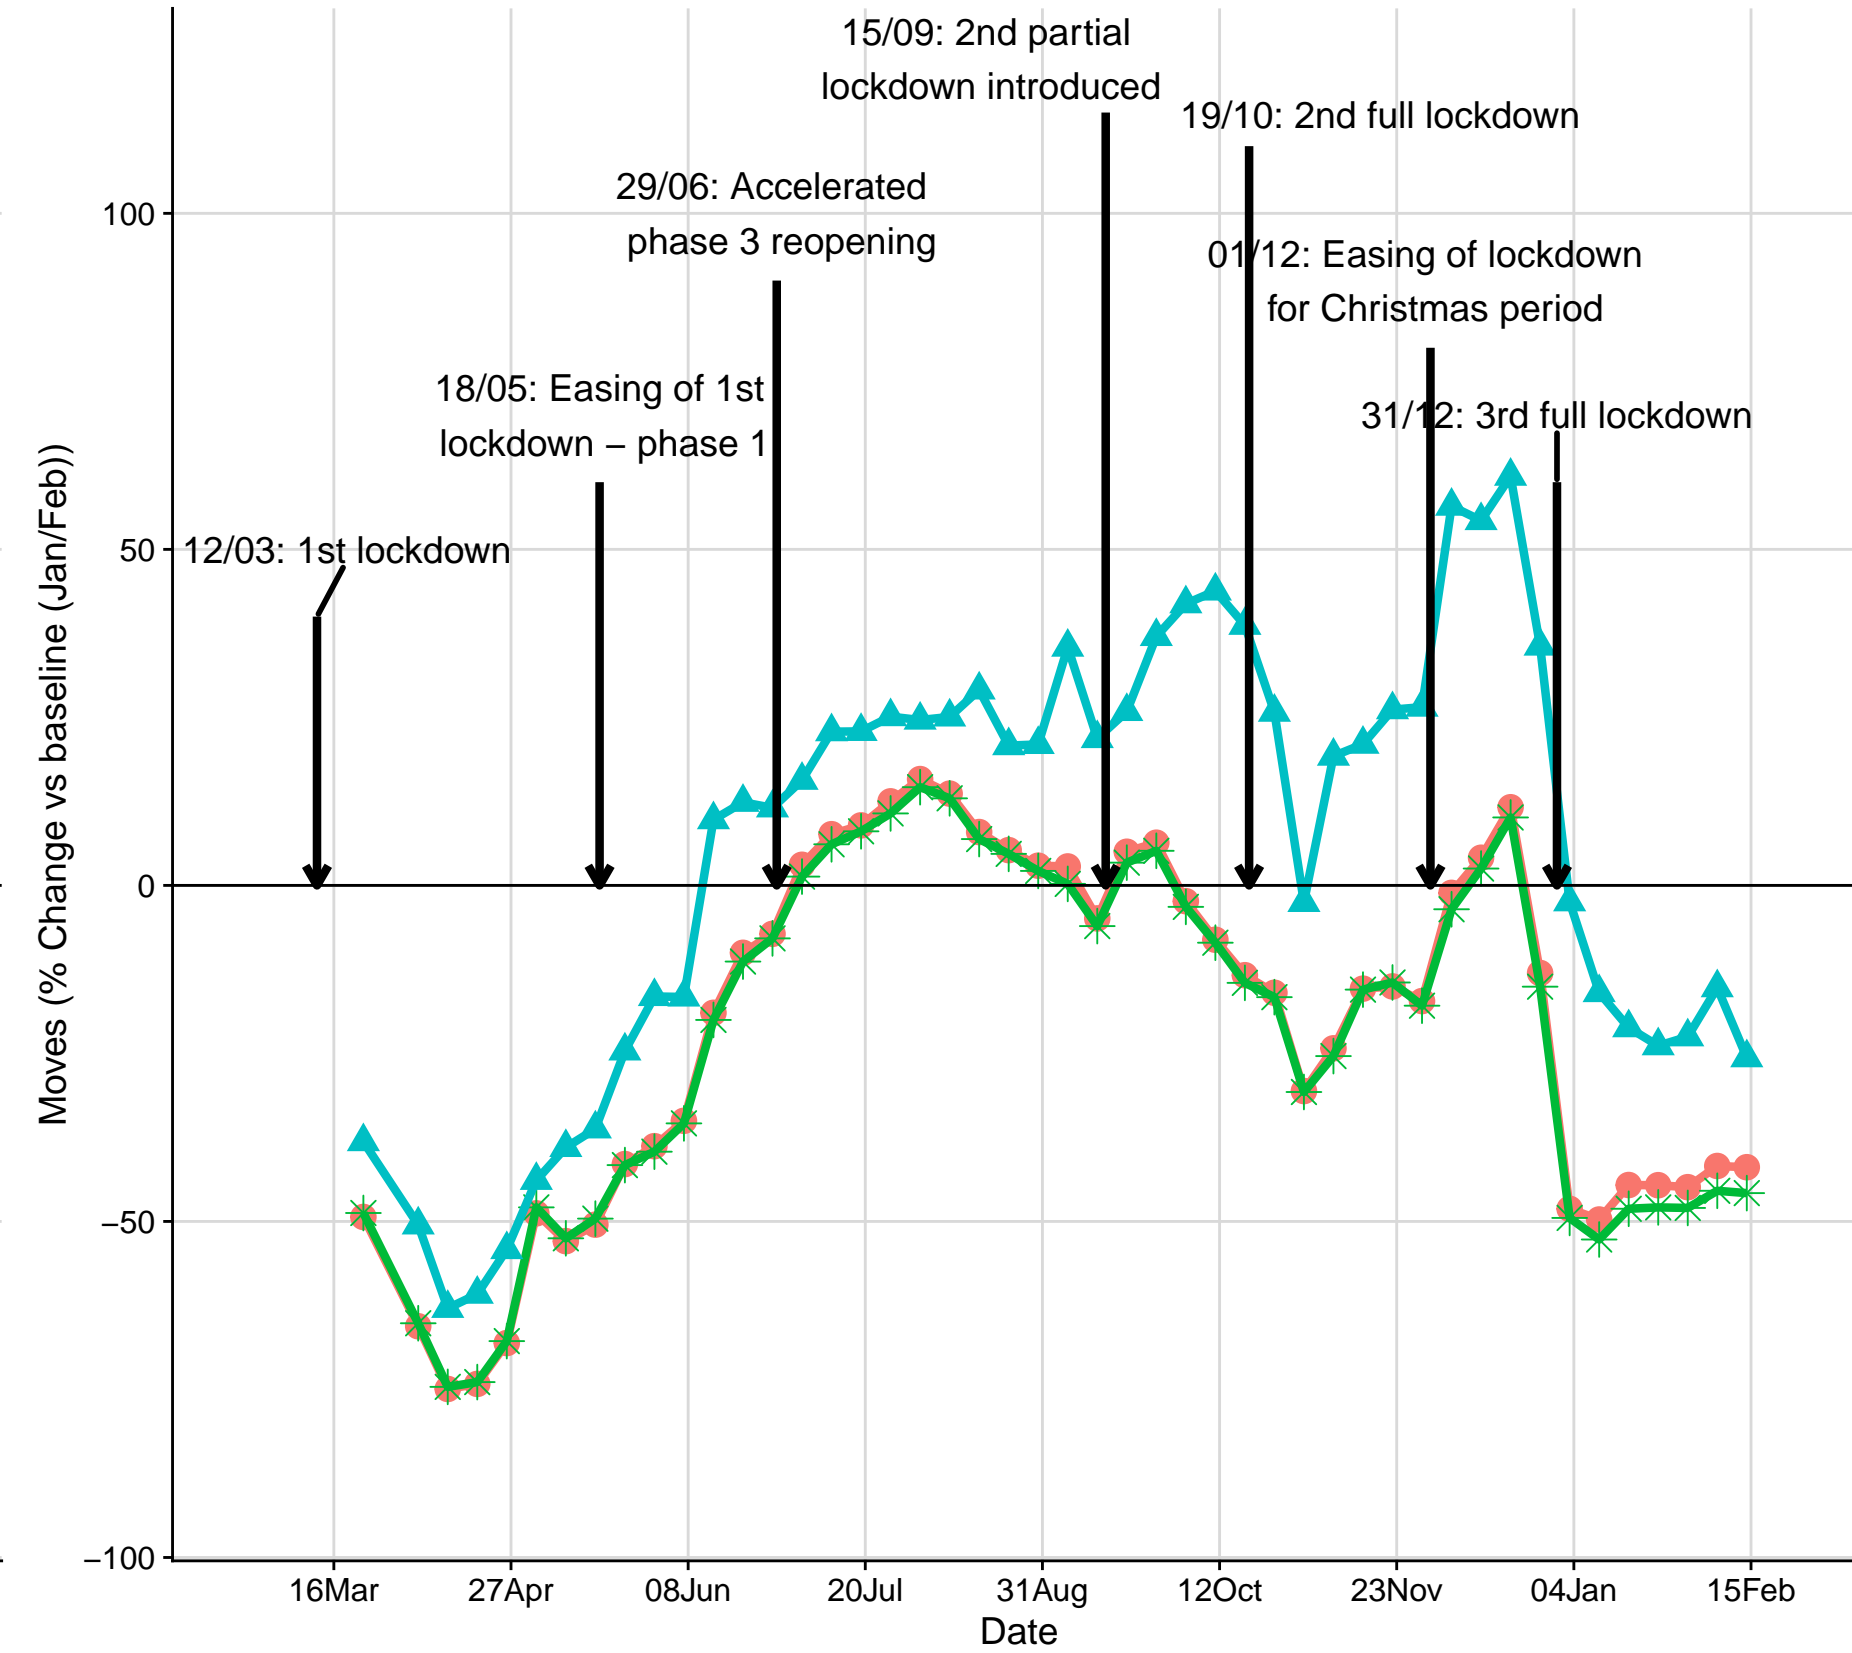

Movement type ● Movements into county \* Movements out of county ▲ Movements within county

**Wexford**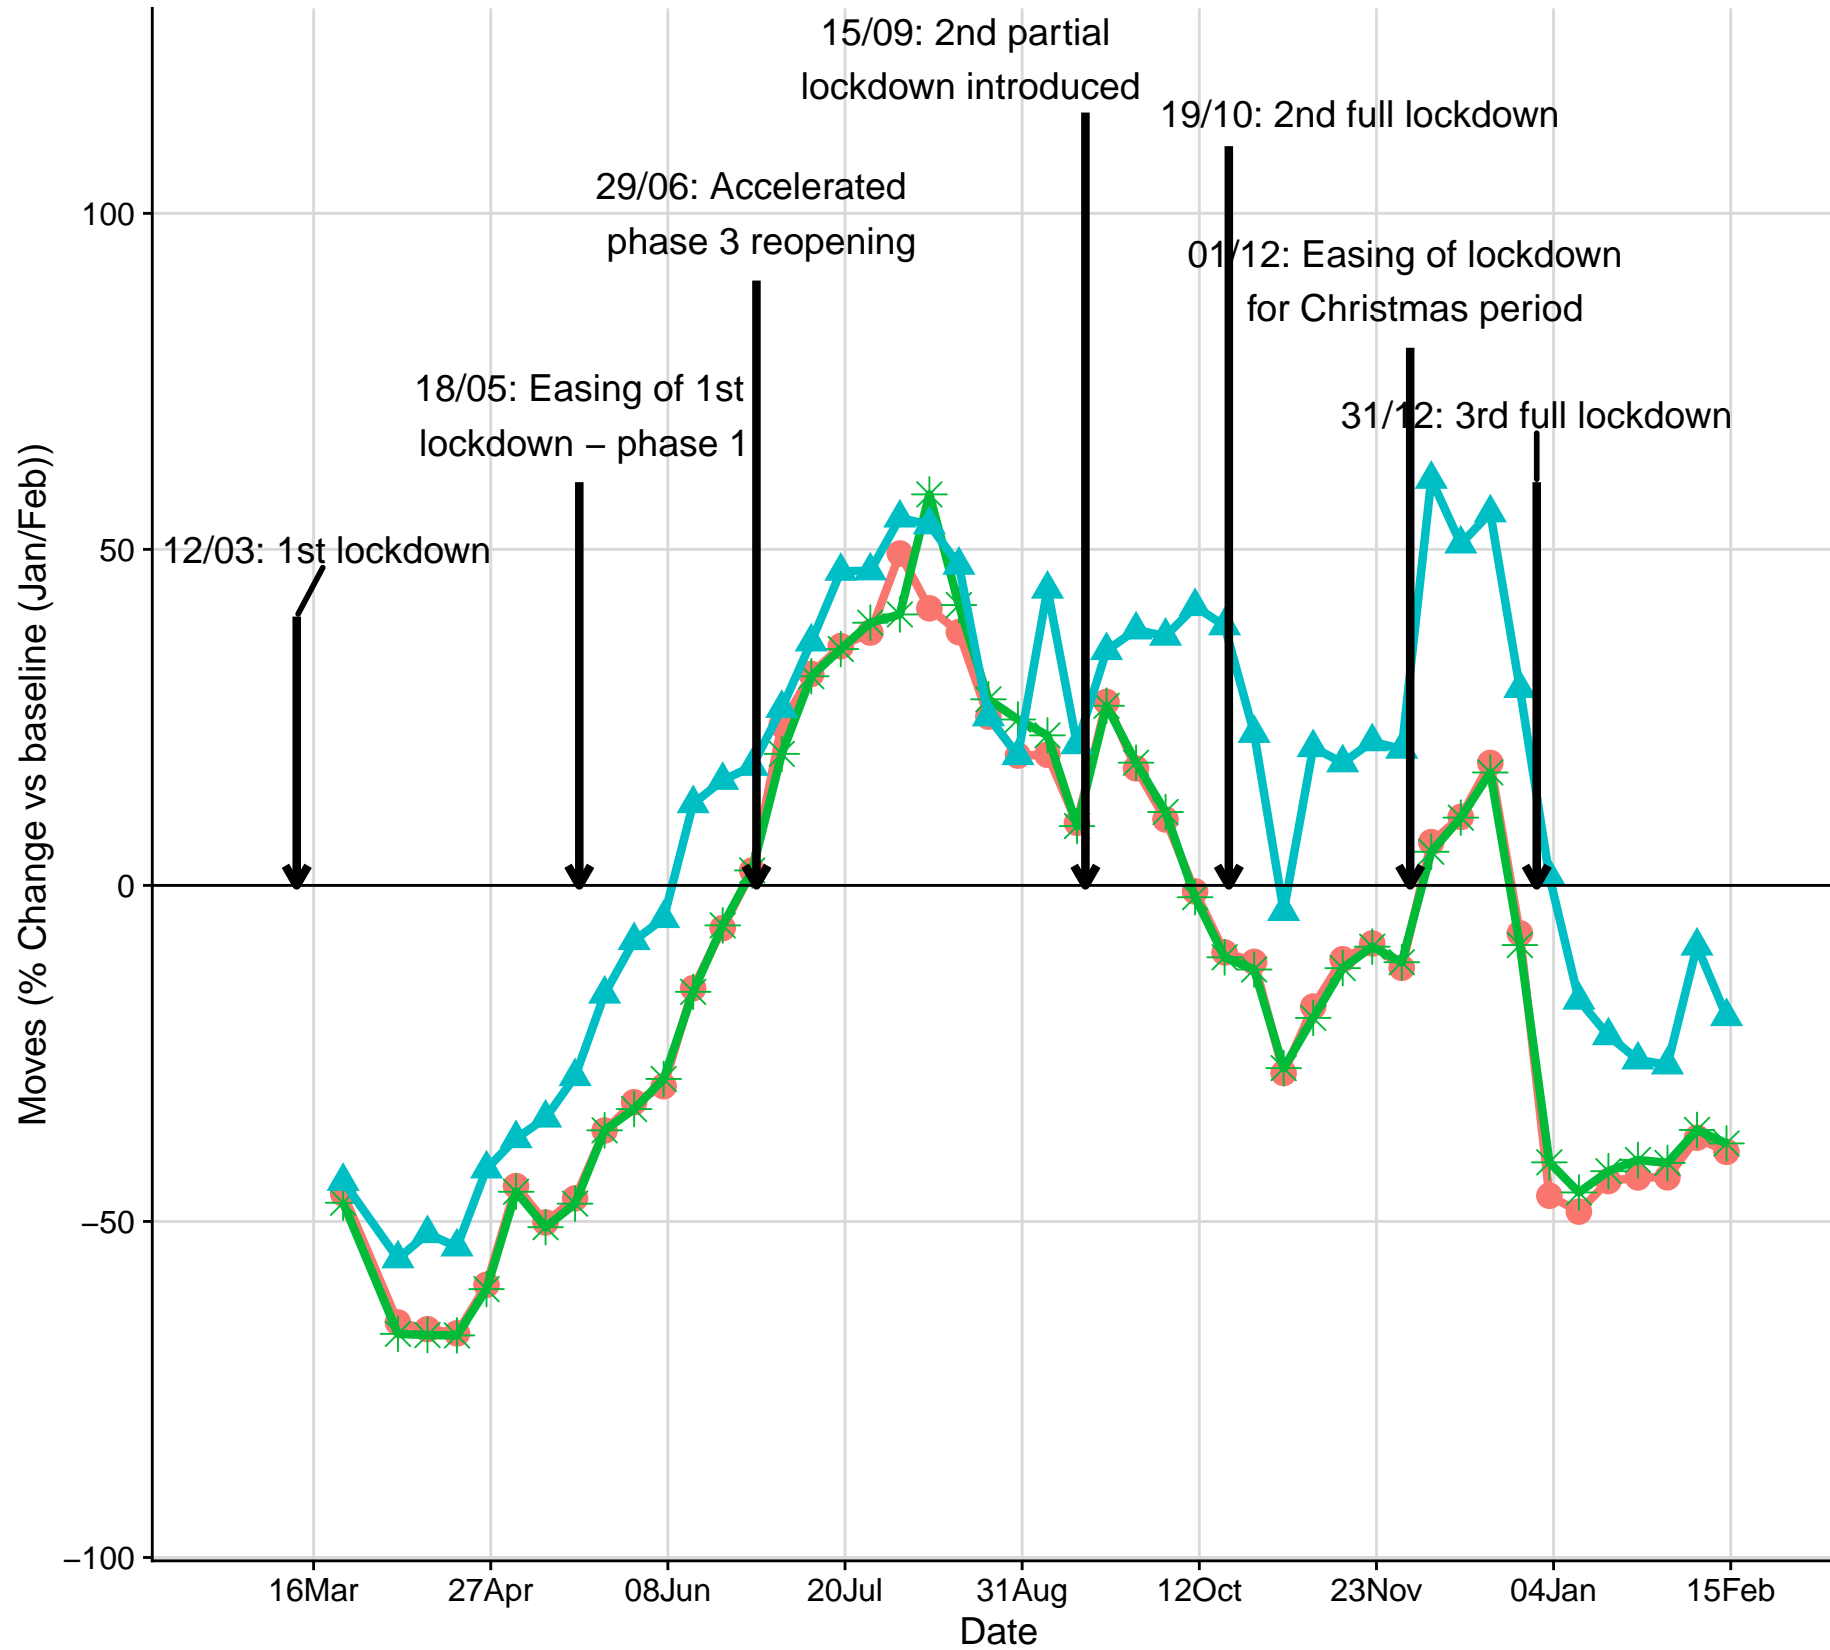**Wicklow**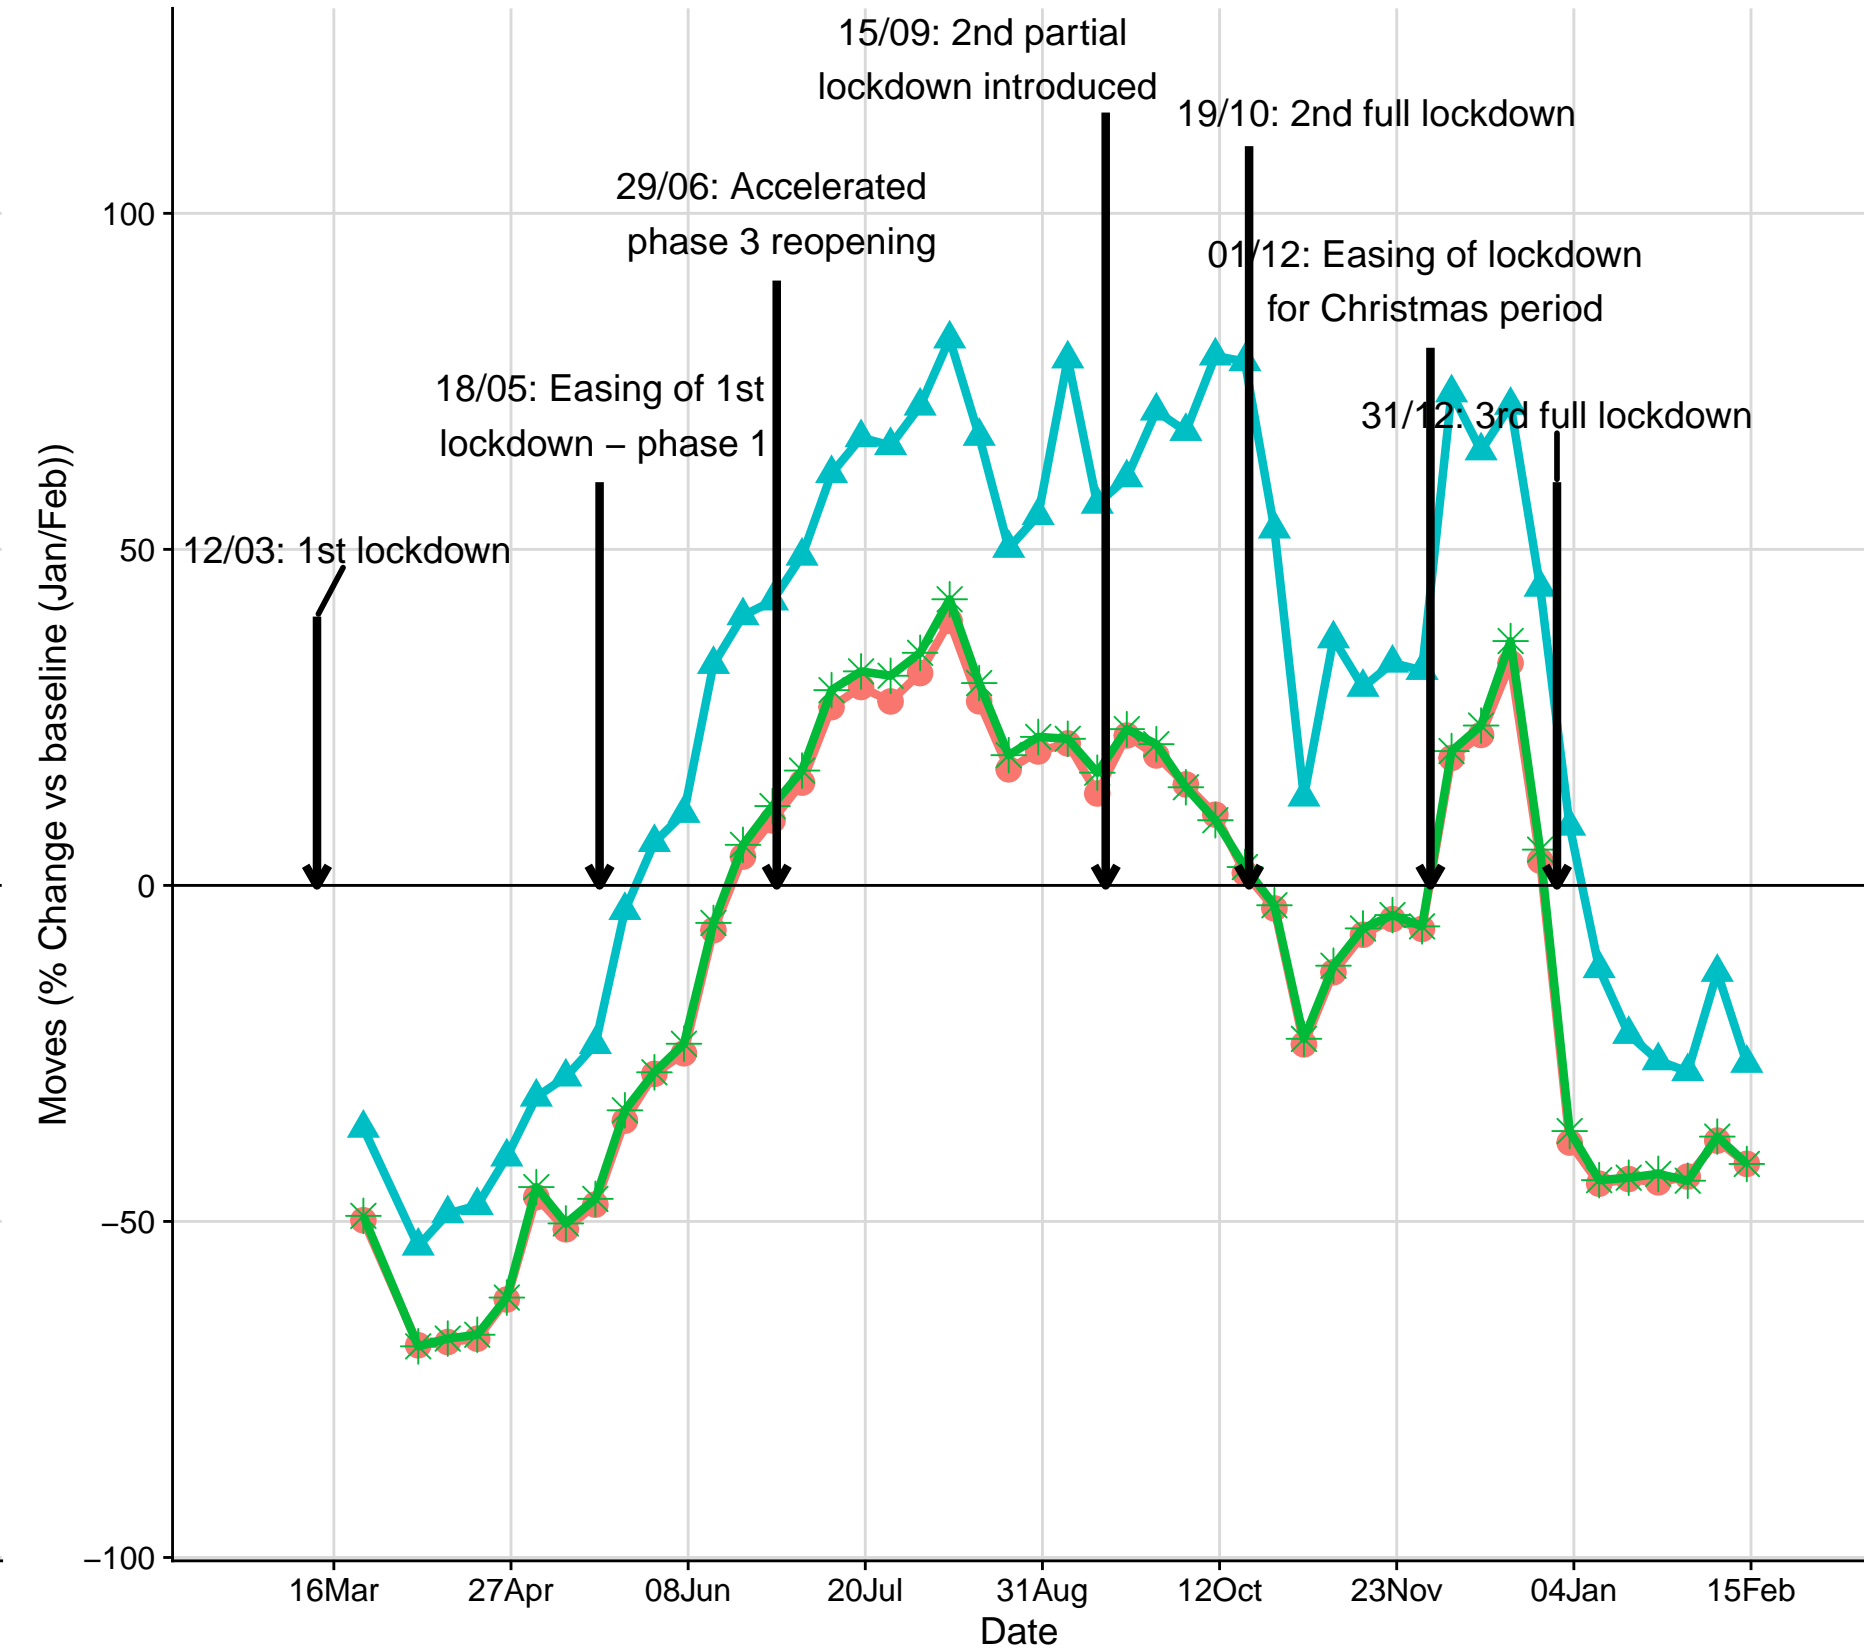

Supplement: Supplementary file 1 [file ijerph-18-06285-s001.zip › SM3_county_CM_age_all_counties08_Mar_2021.pdf]
