# Supplementary material for: Population Mobility Trends, Deprivation Index and the Spatio-Temporal Spread of Coronavirus Disease 2019 in Ireland
Source: Int J Environ Res Public Health. 2021 Jun 10;18(12):6285. doi: 10.3390/ijerph18126285 (PMC8296107; doi:10.3390/ijerph18126285)

Smoothed RR estimates from BYM model

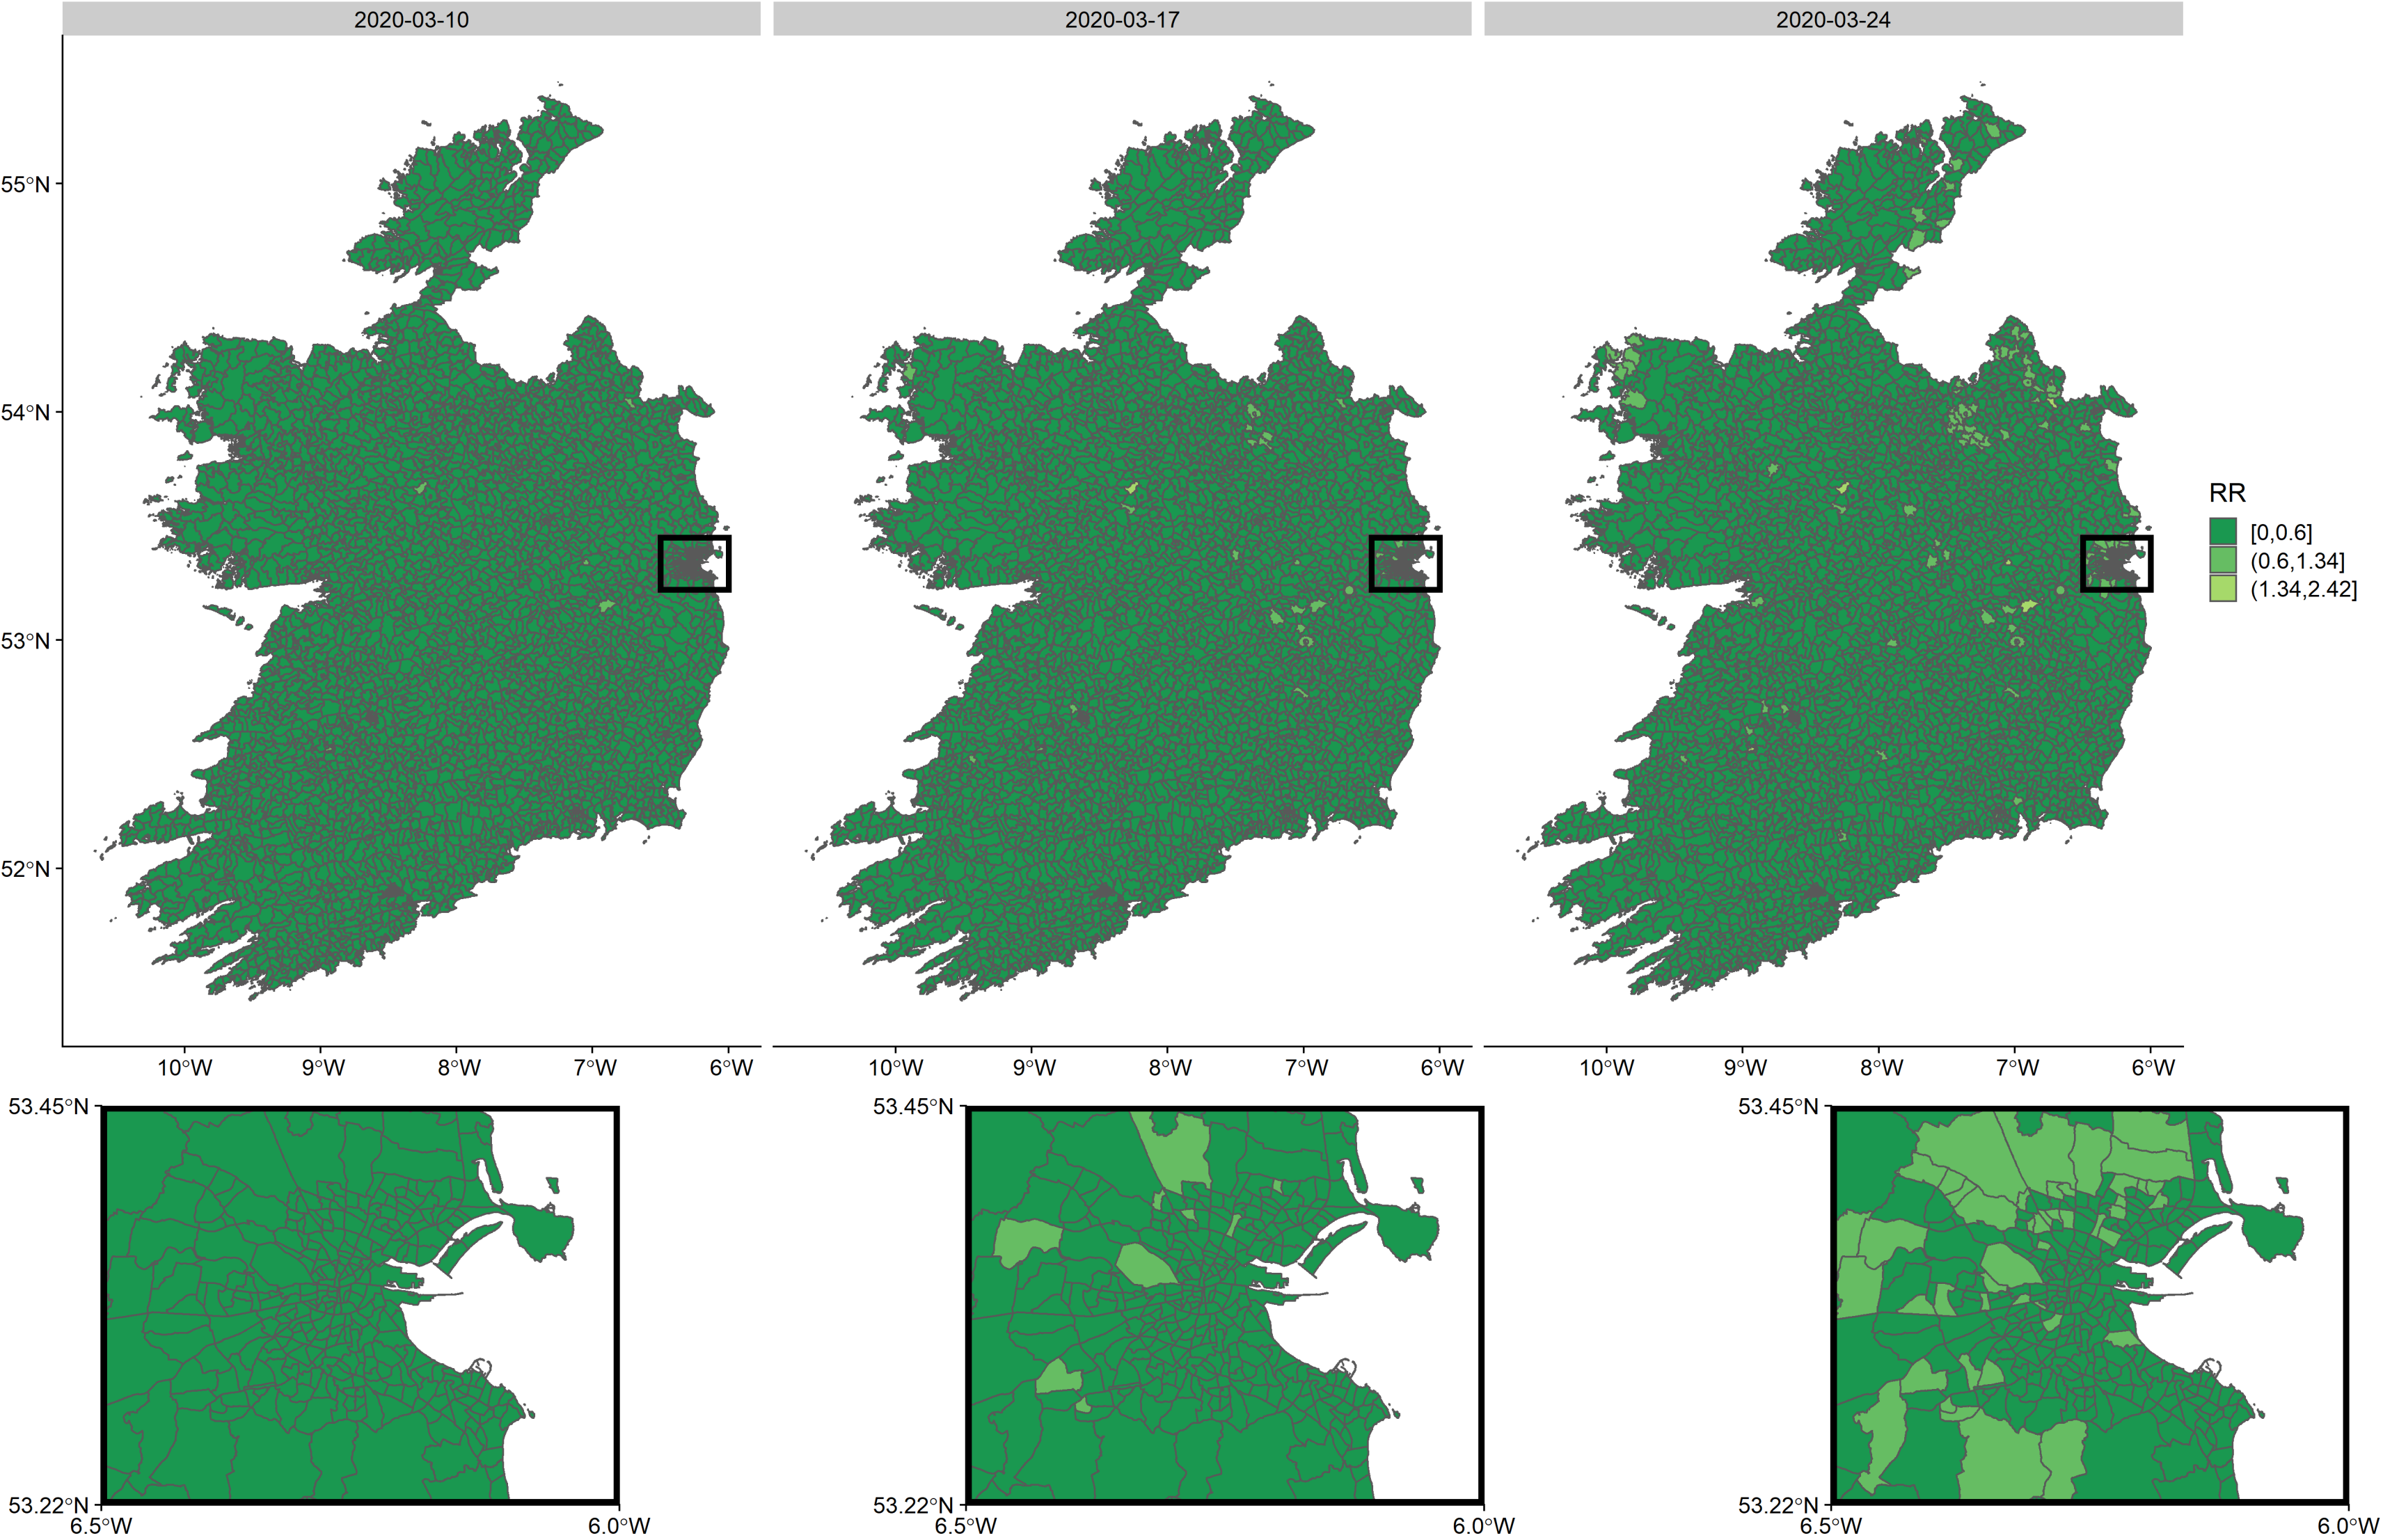

Smoothed RR estimates from BYM model

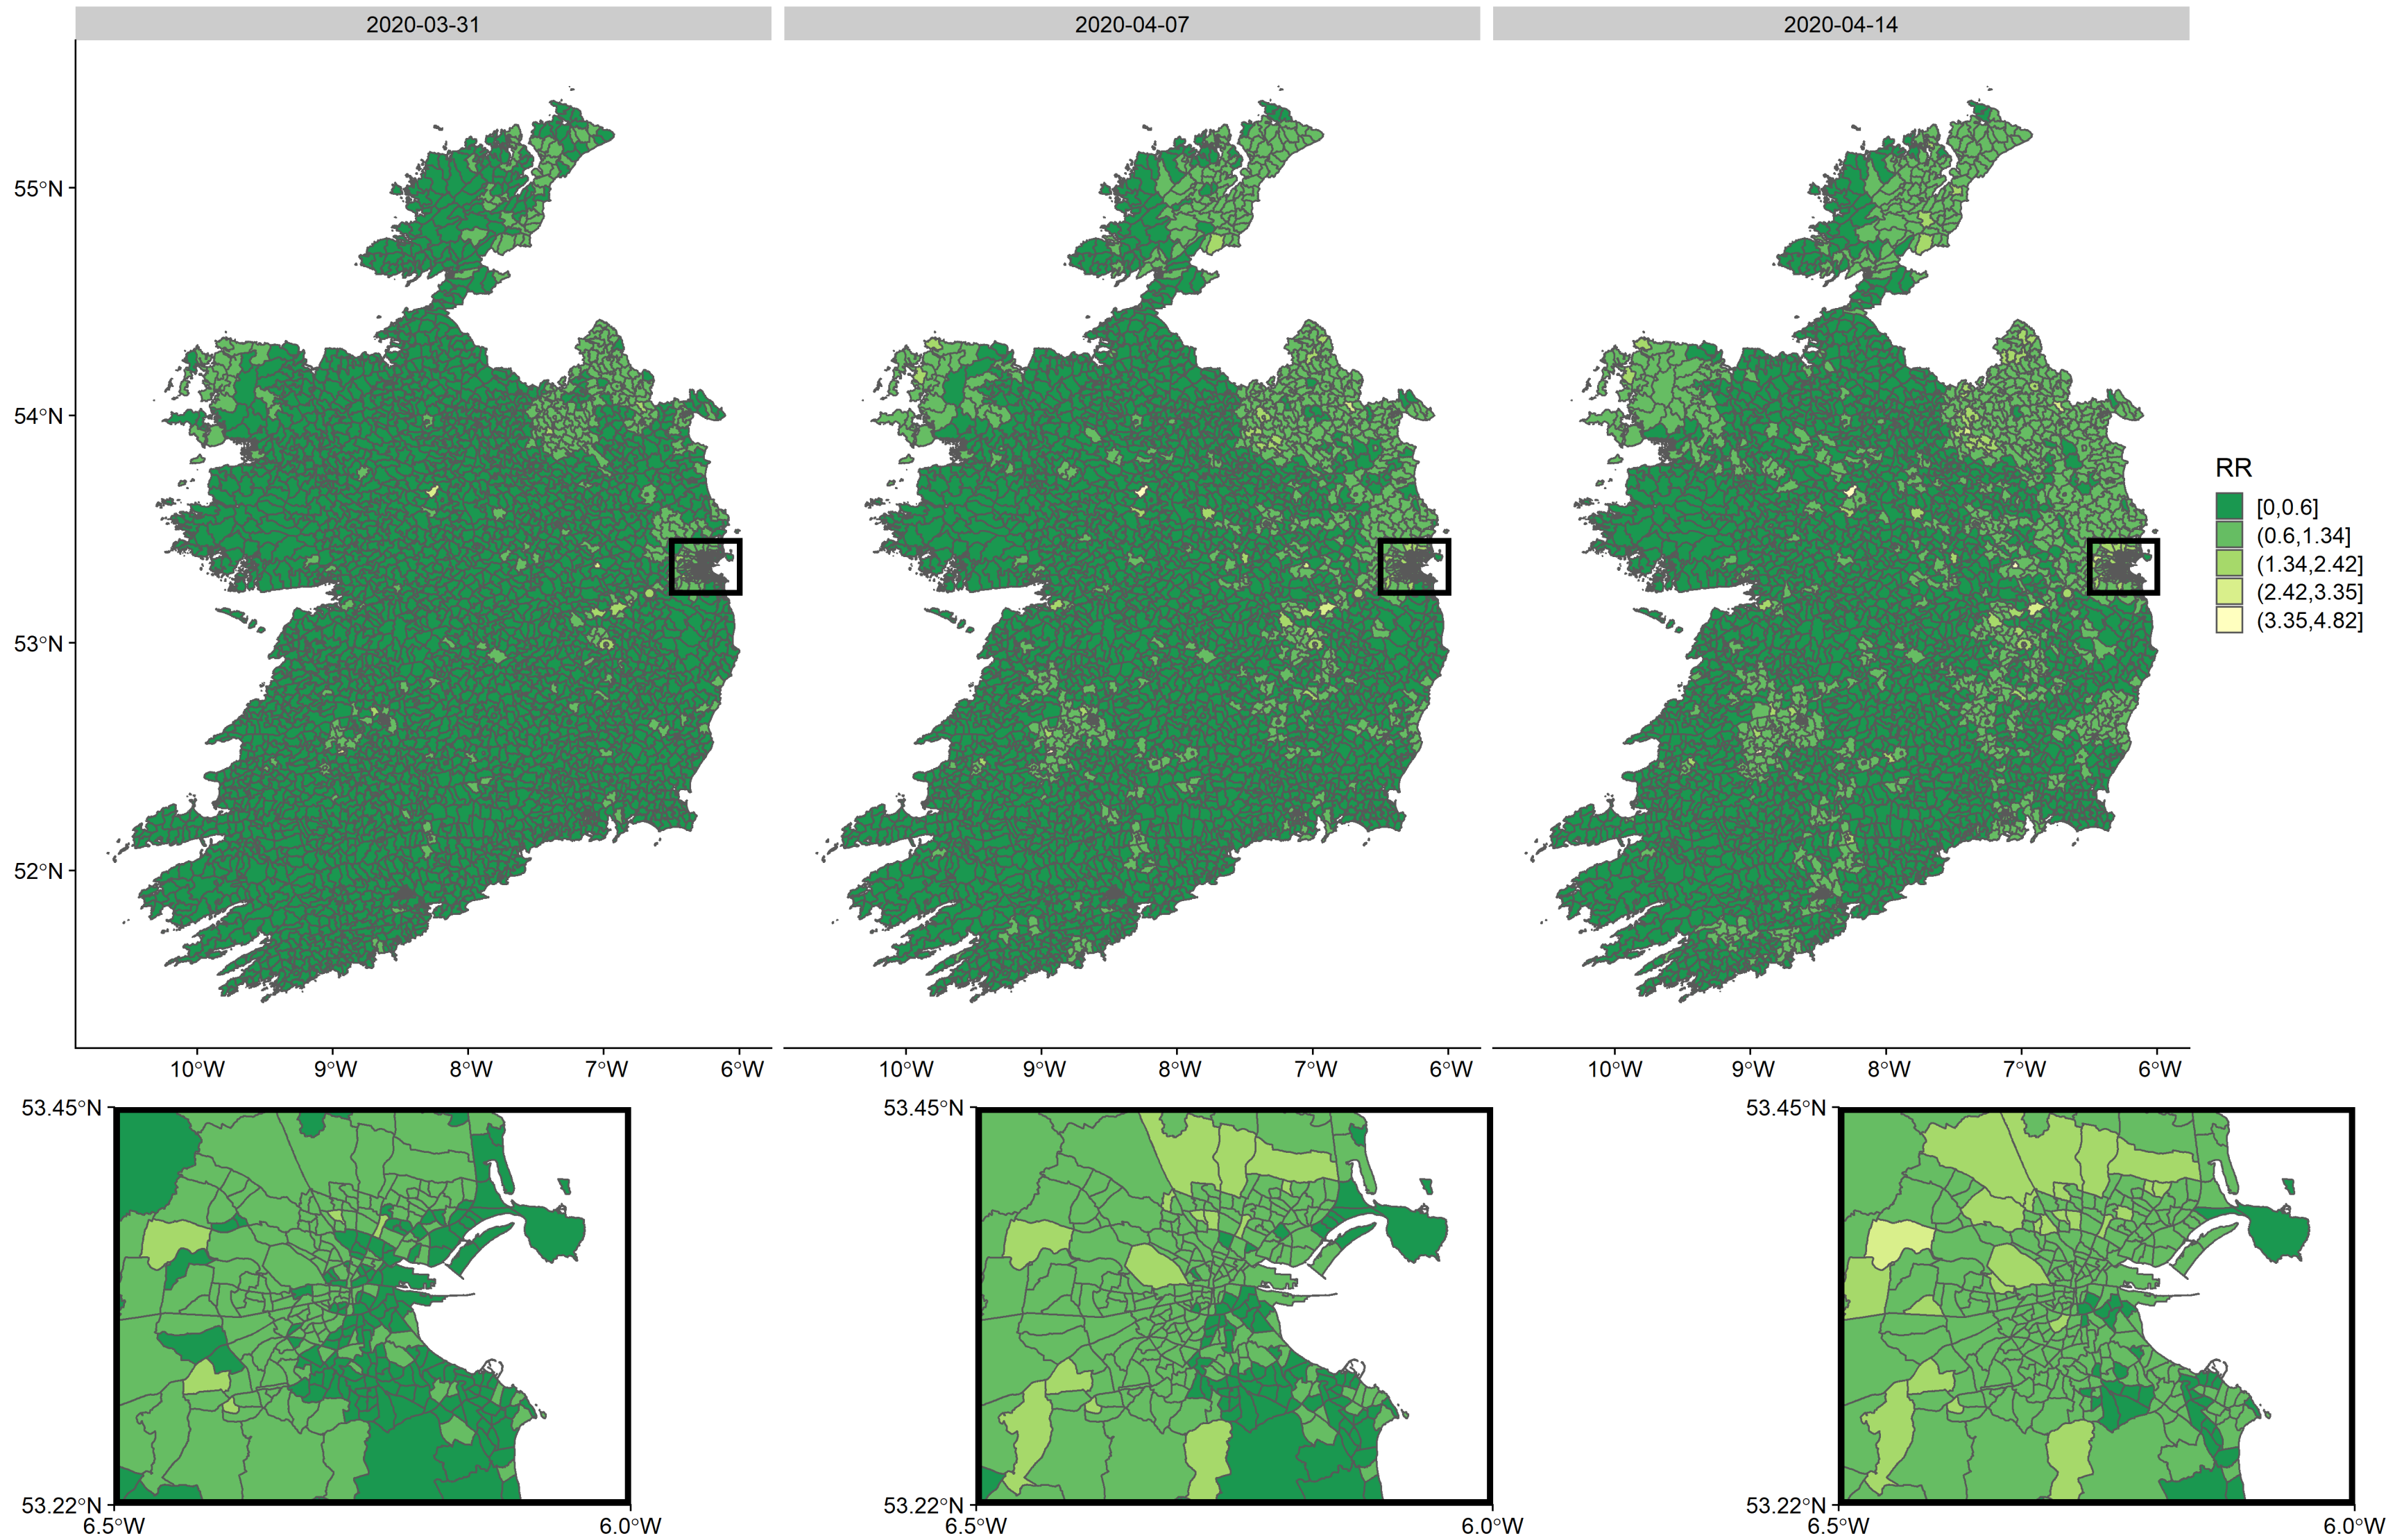

Smoothed RR estimates from BYM model

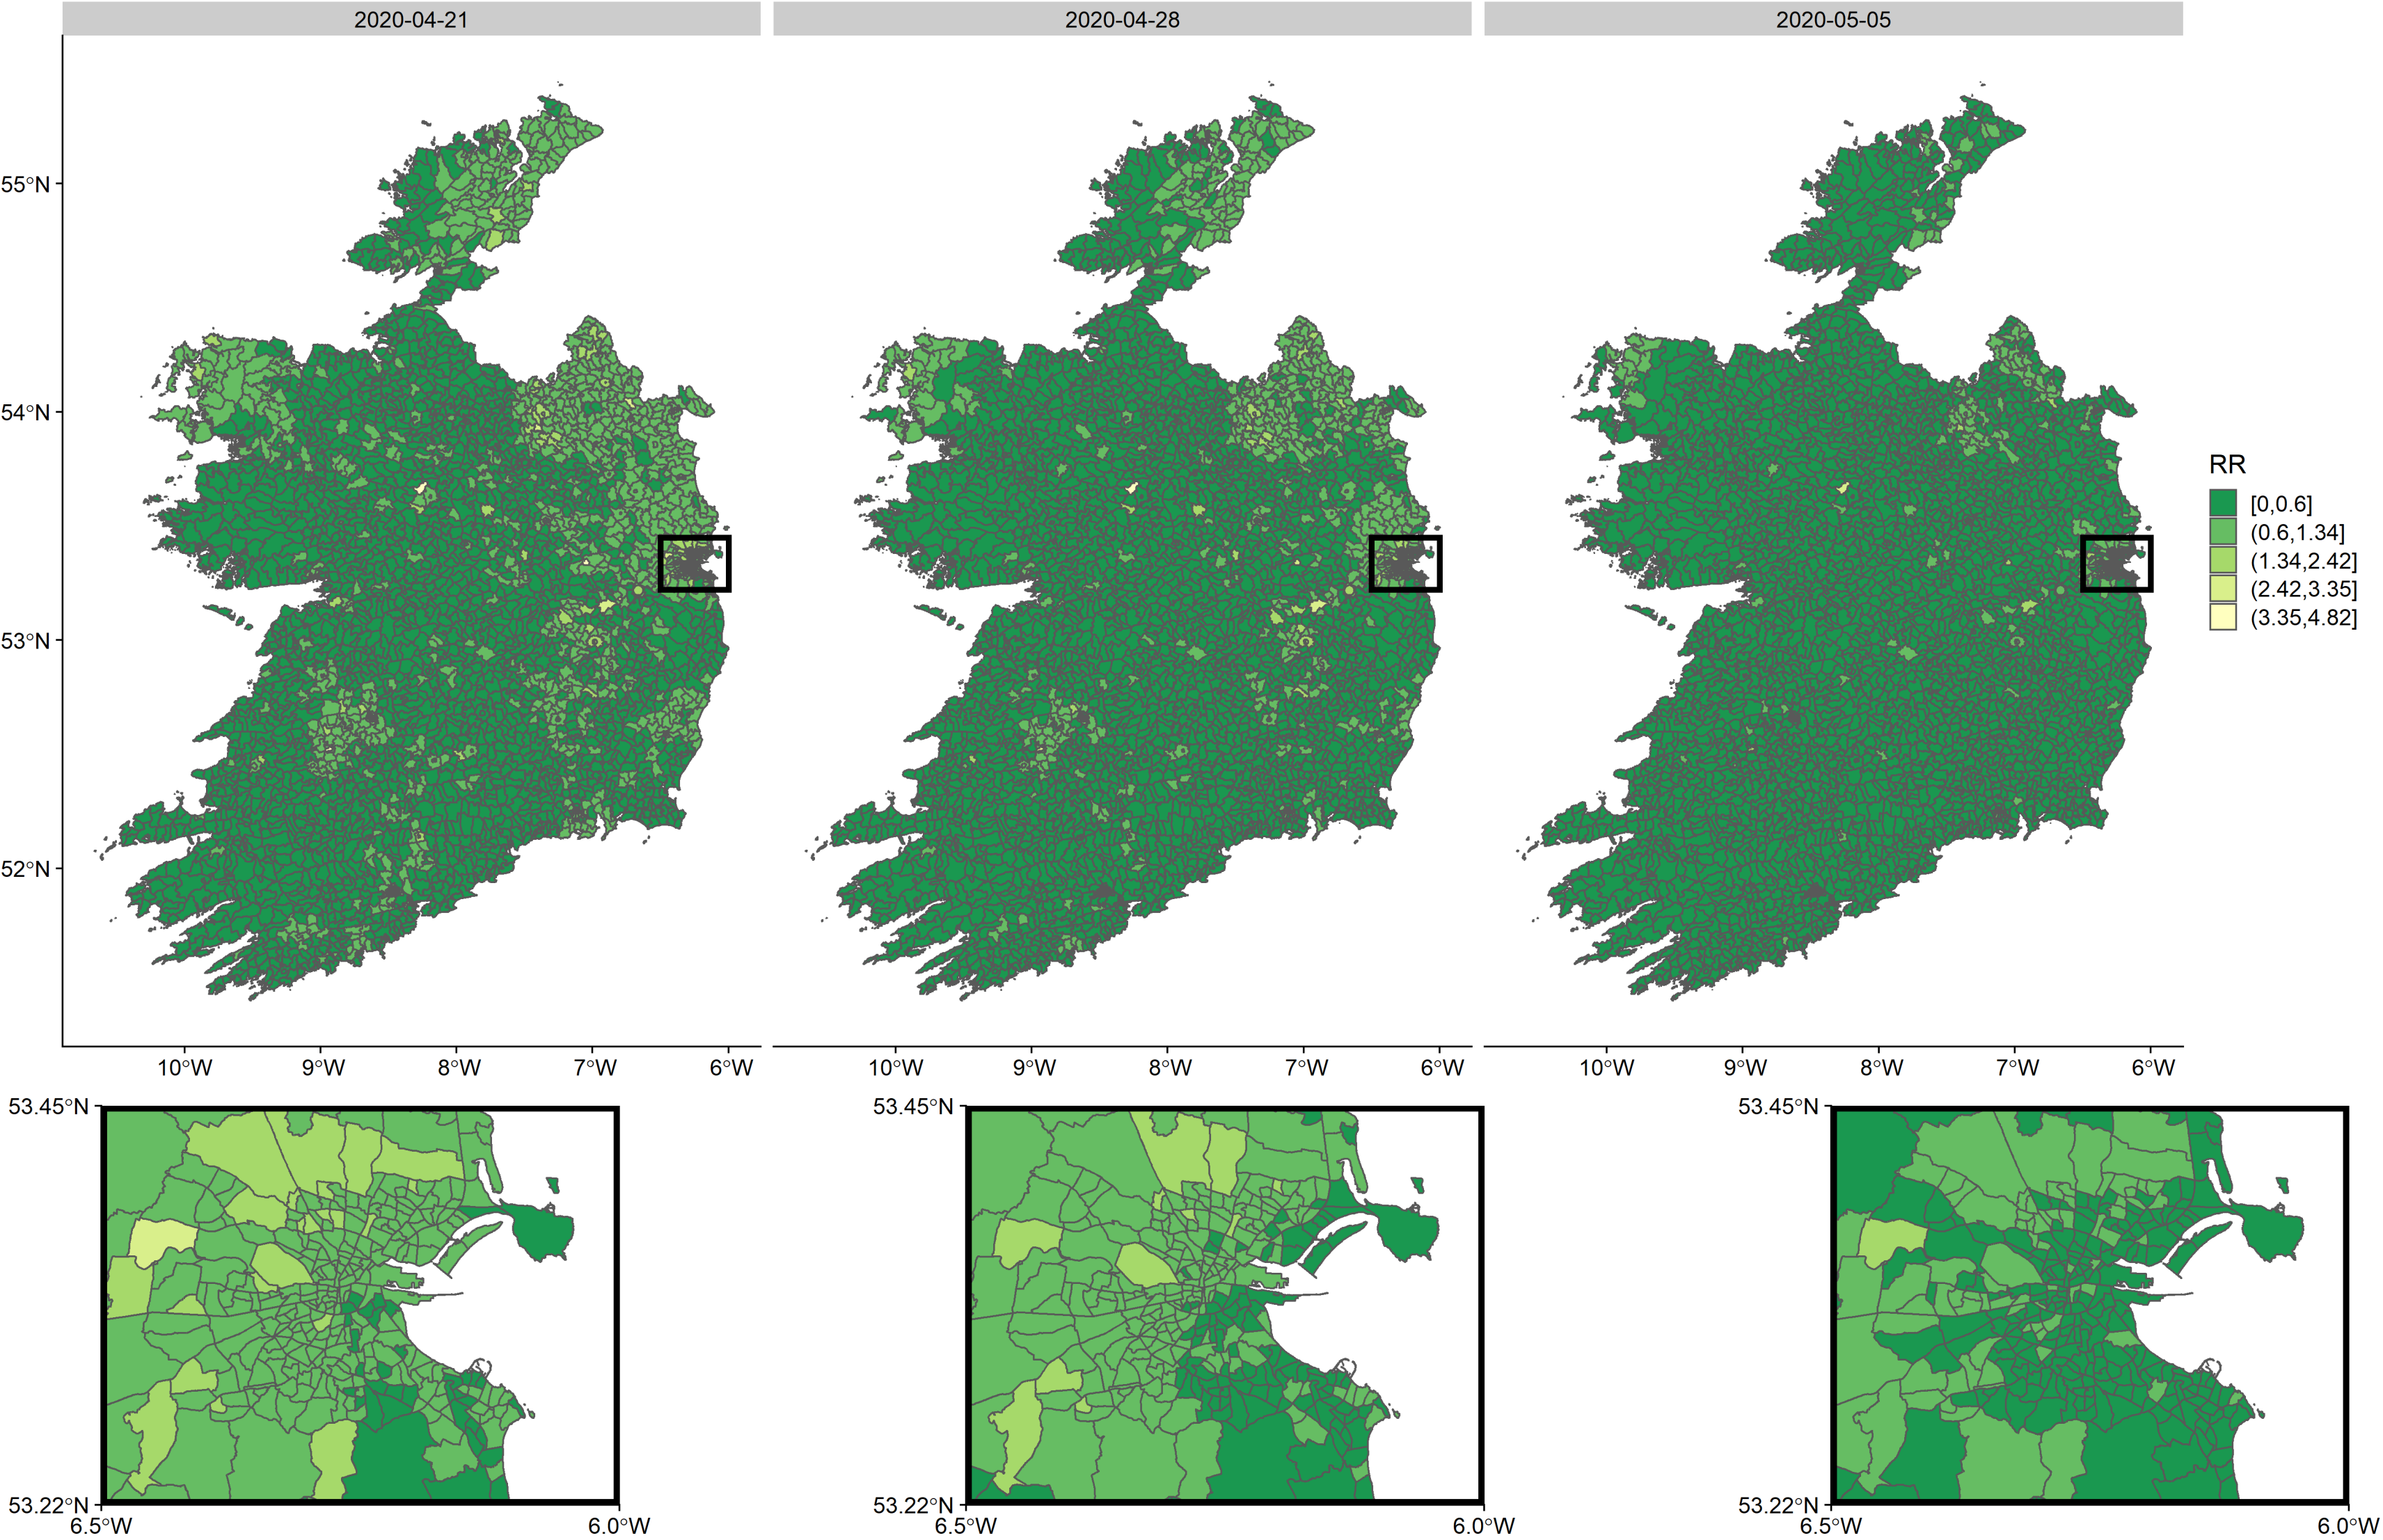

Smoothed RR estimates from BYM model

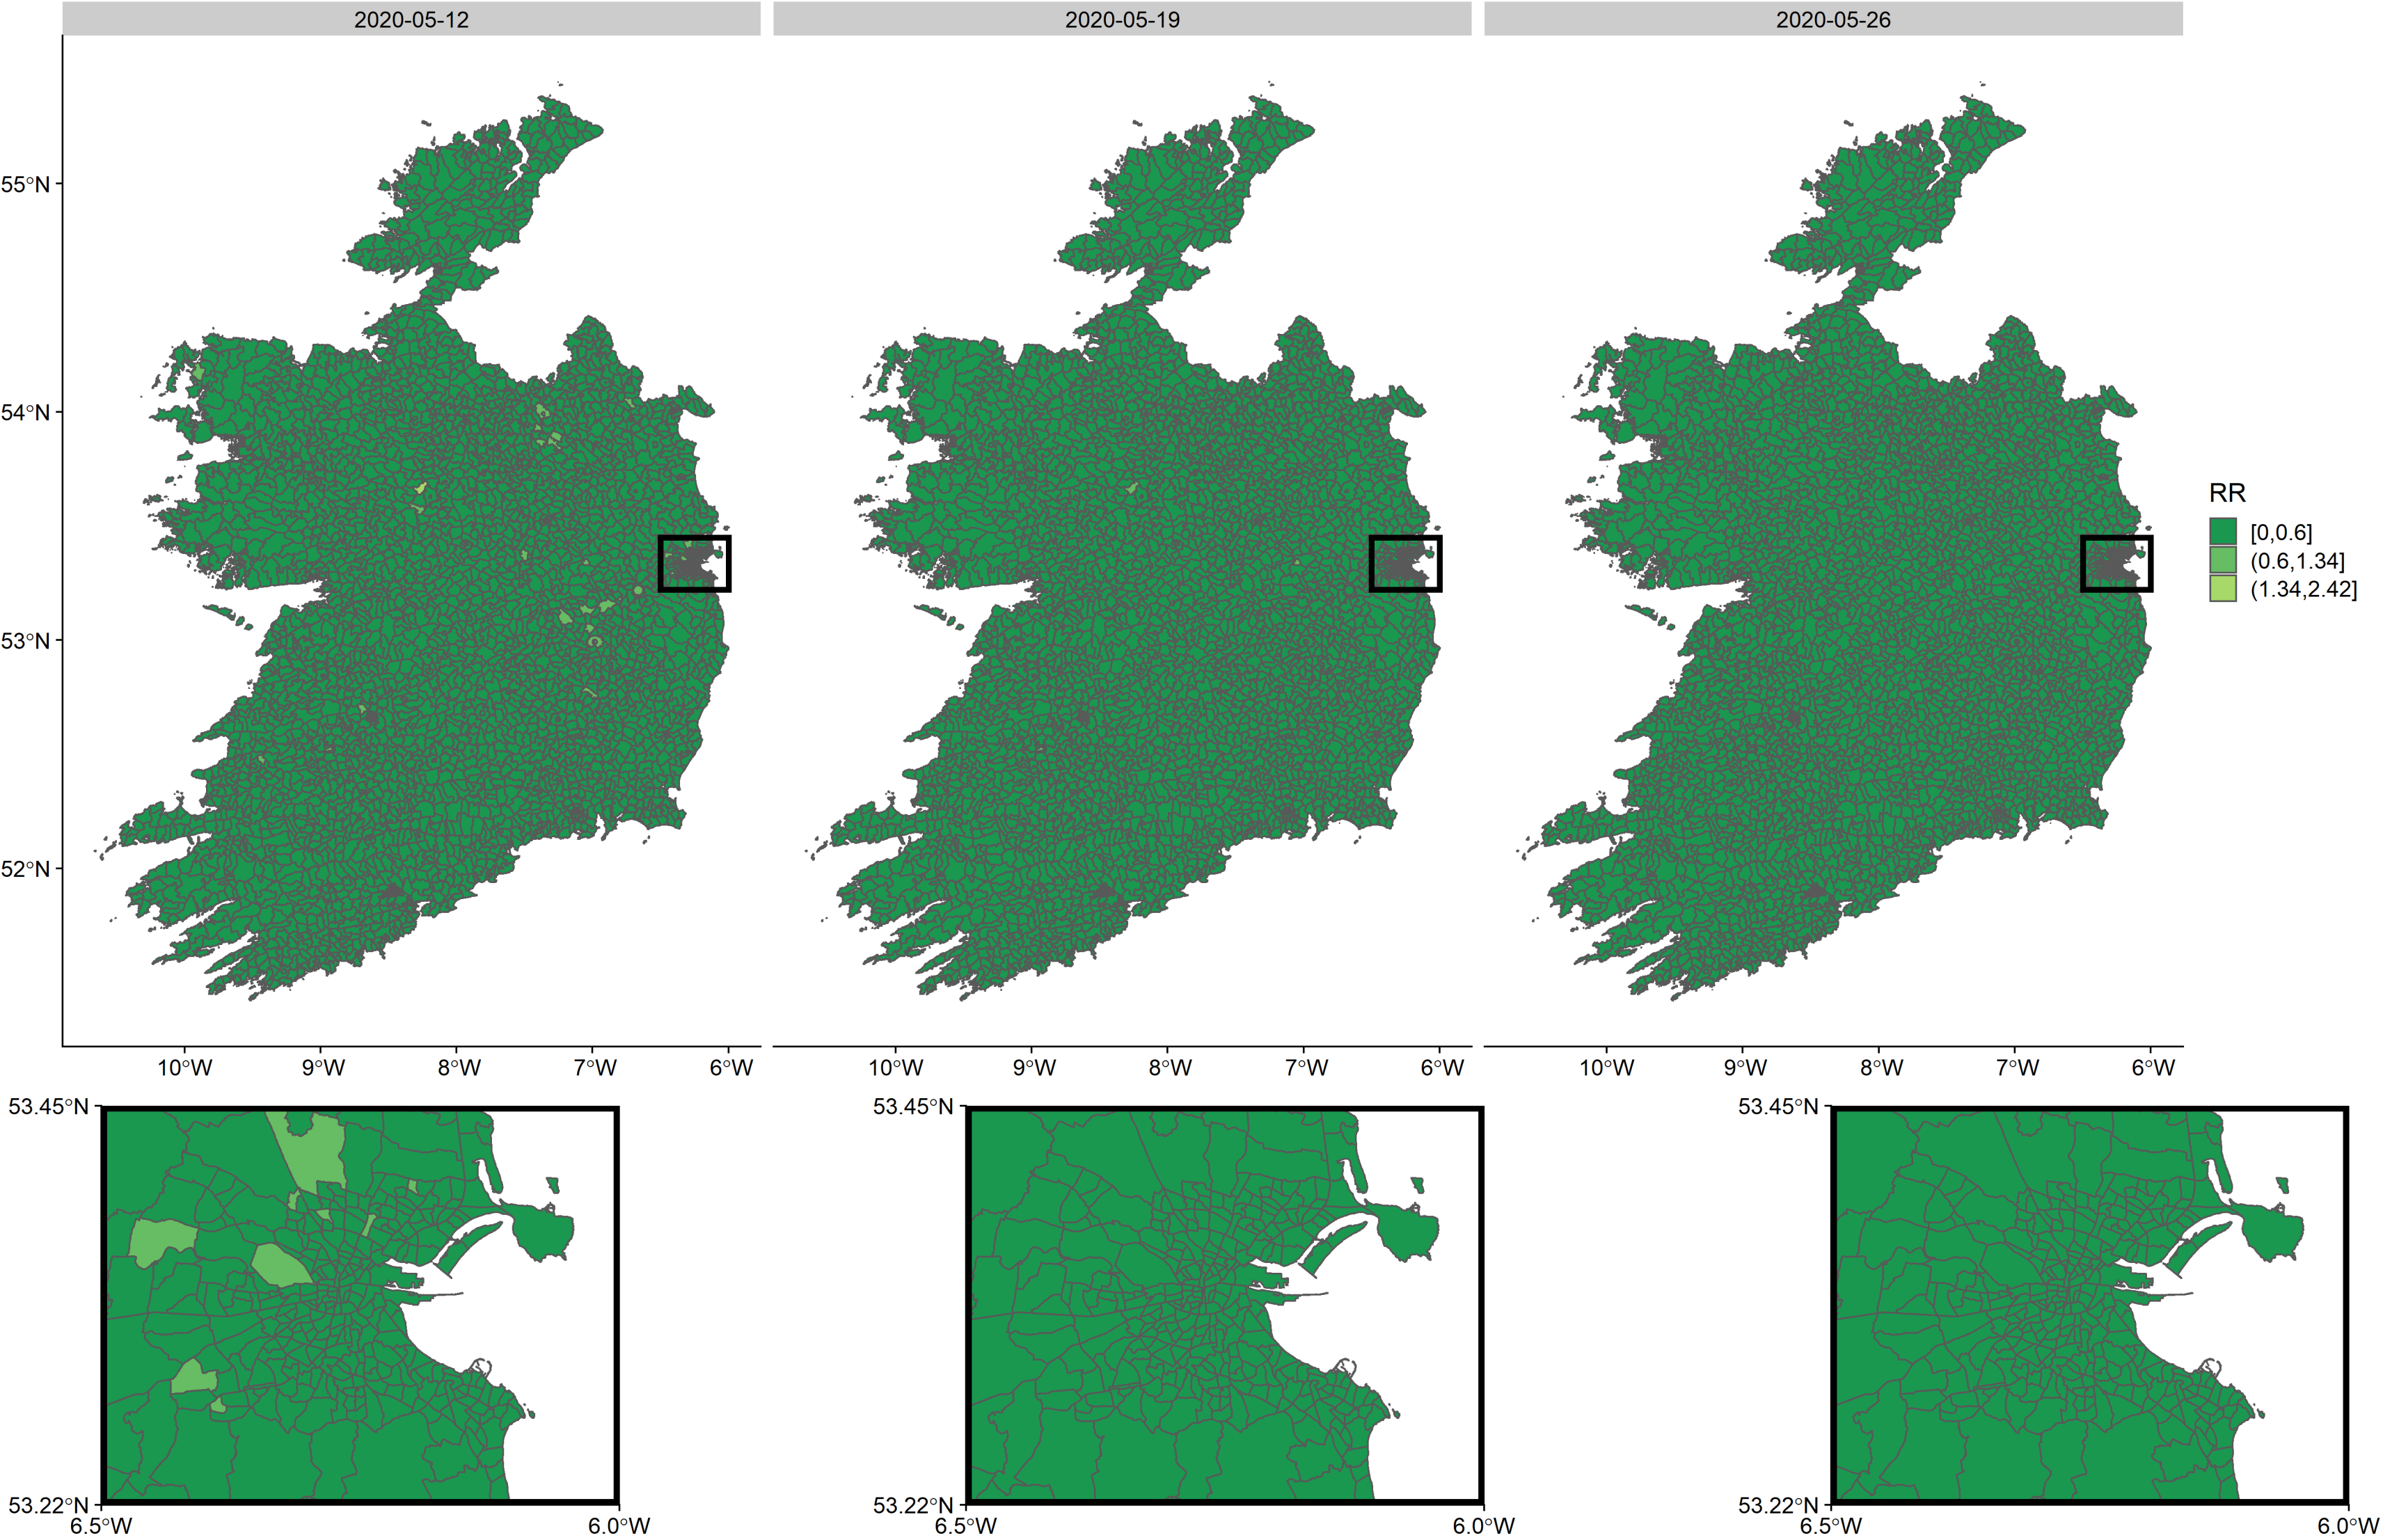

Smoothed RR estimates from BYM model

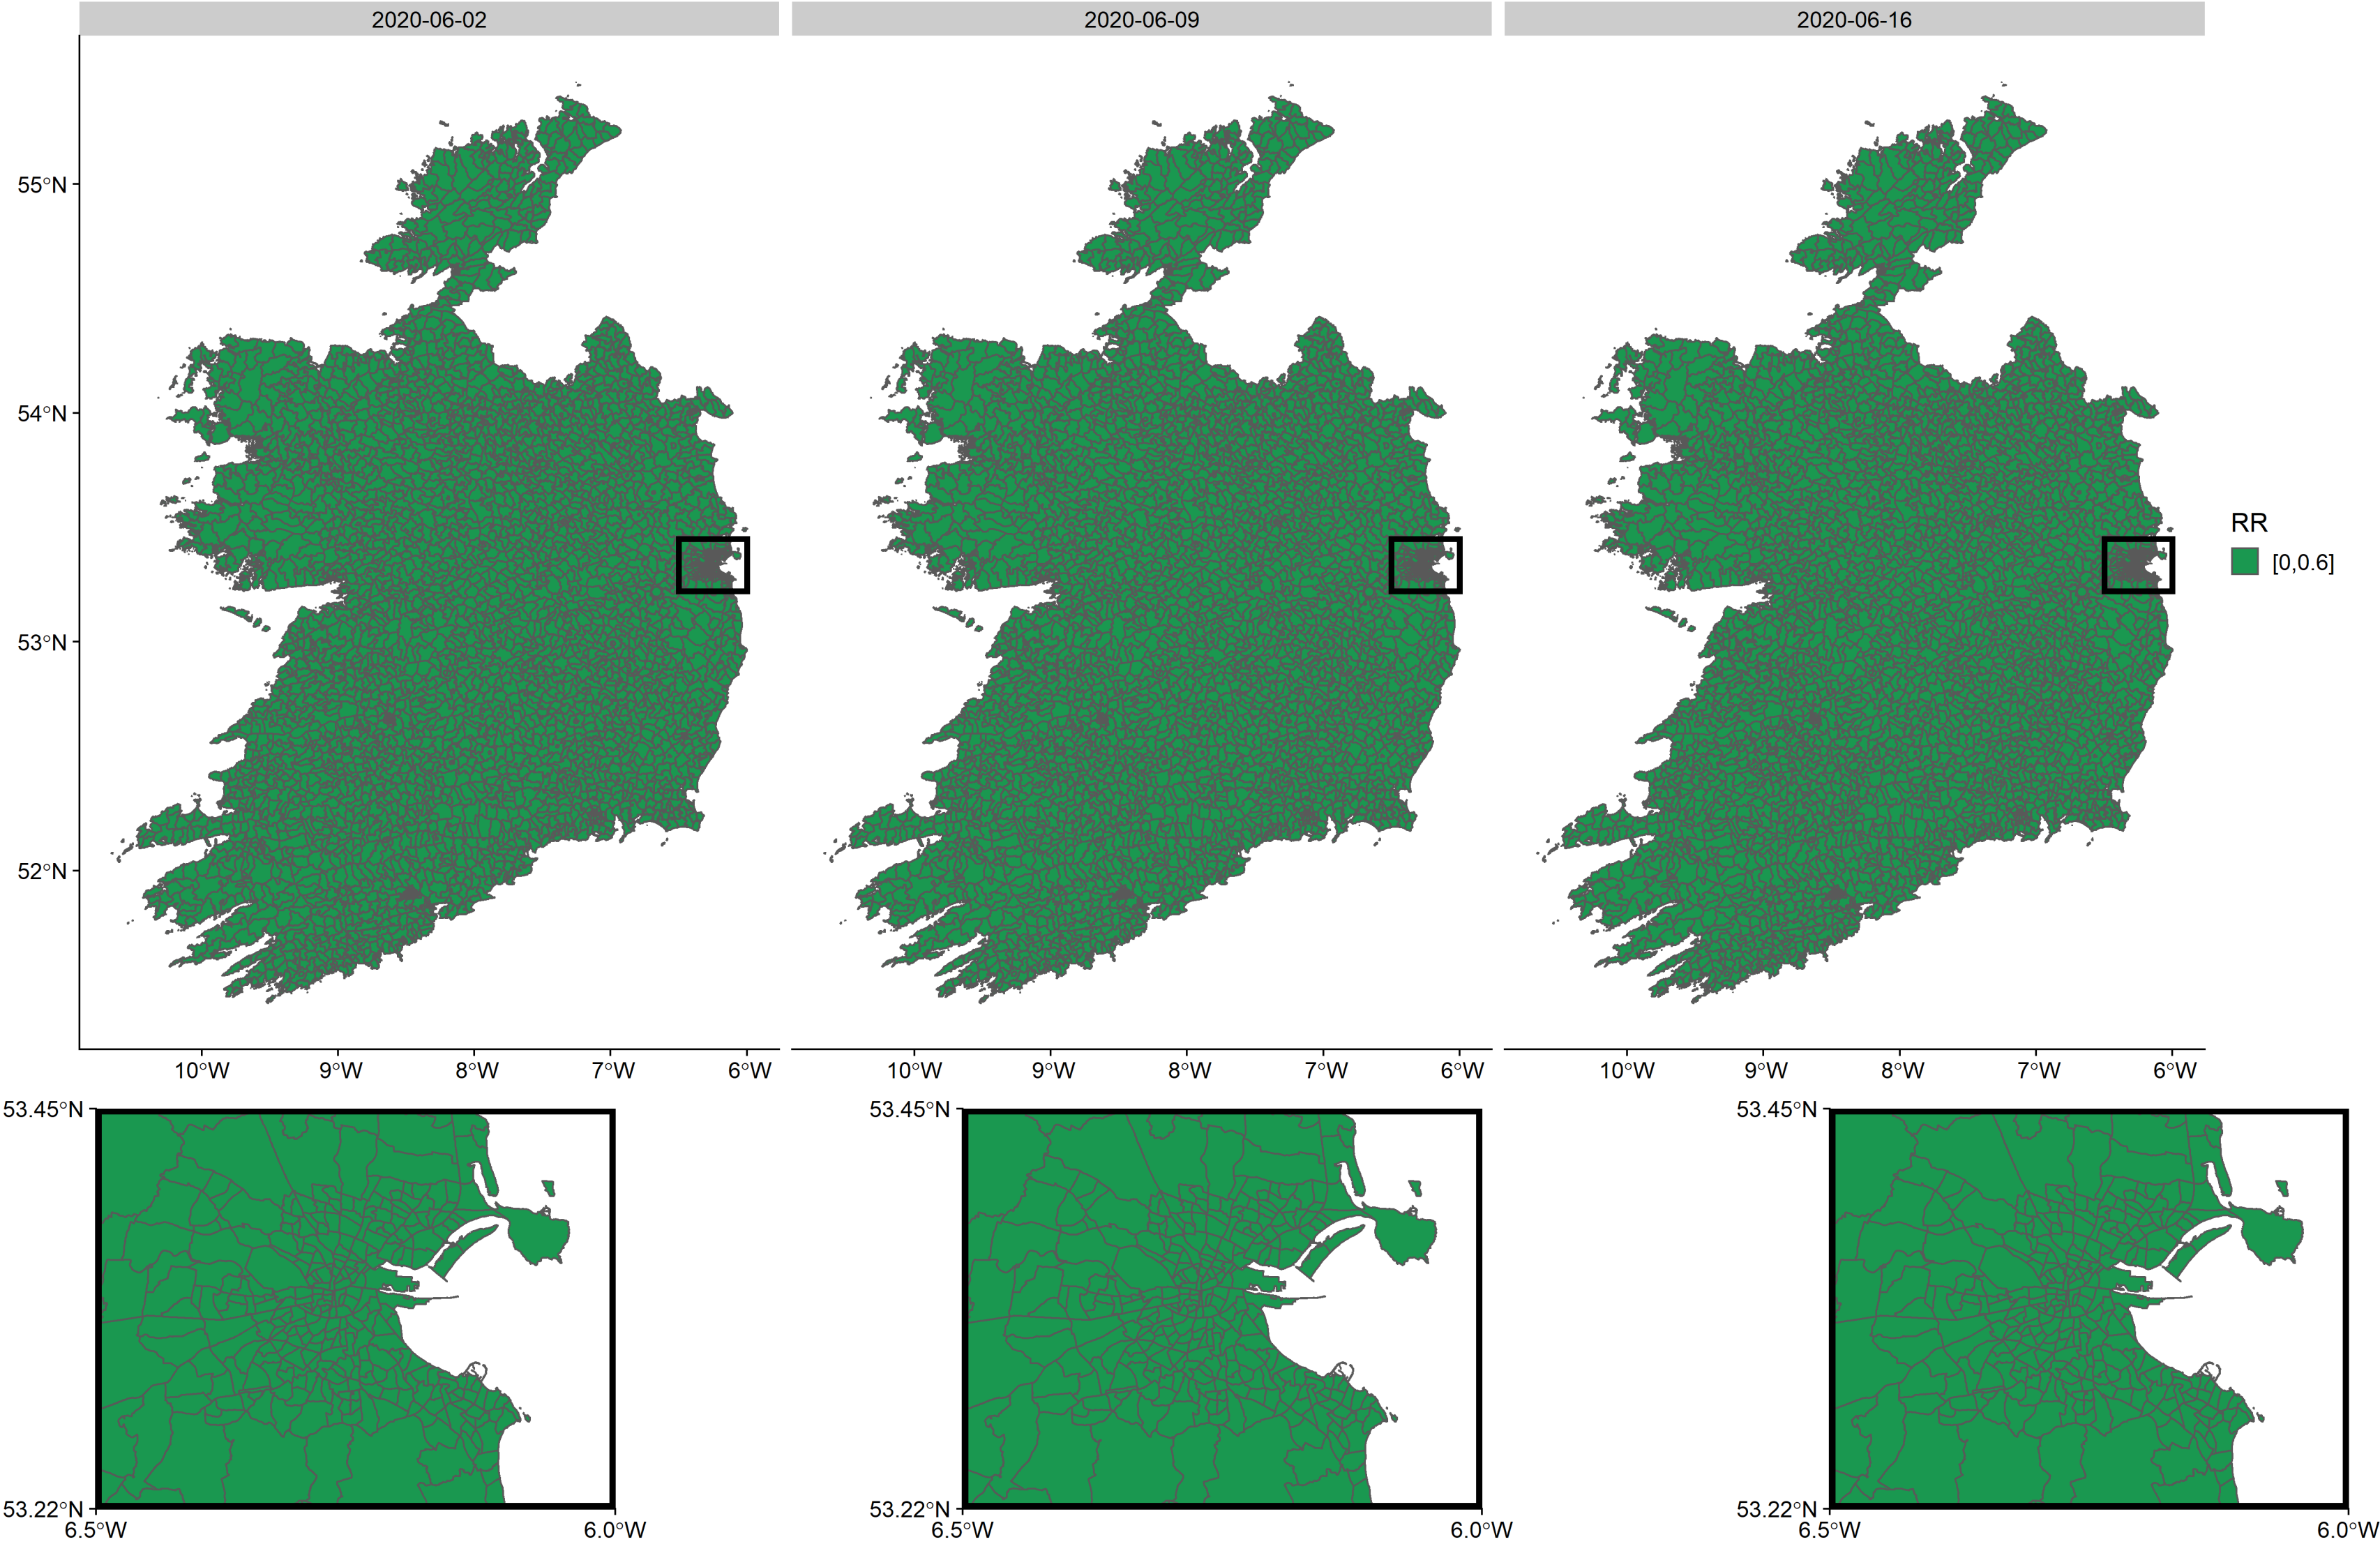

Smoothed RR estimates from BYM model

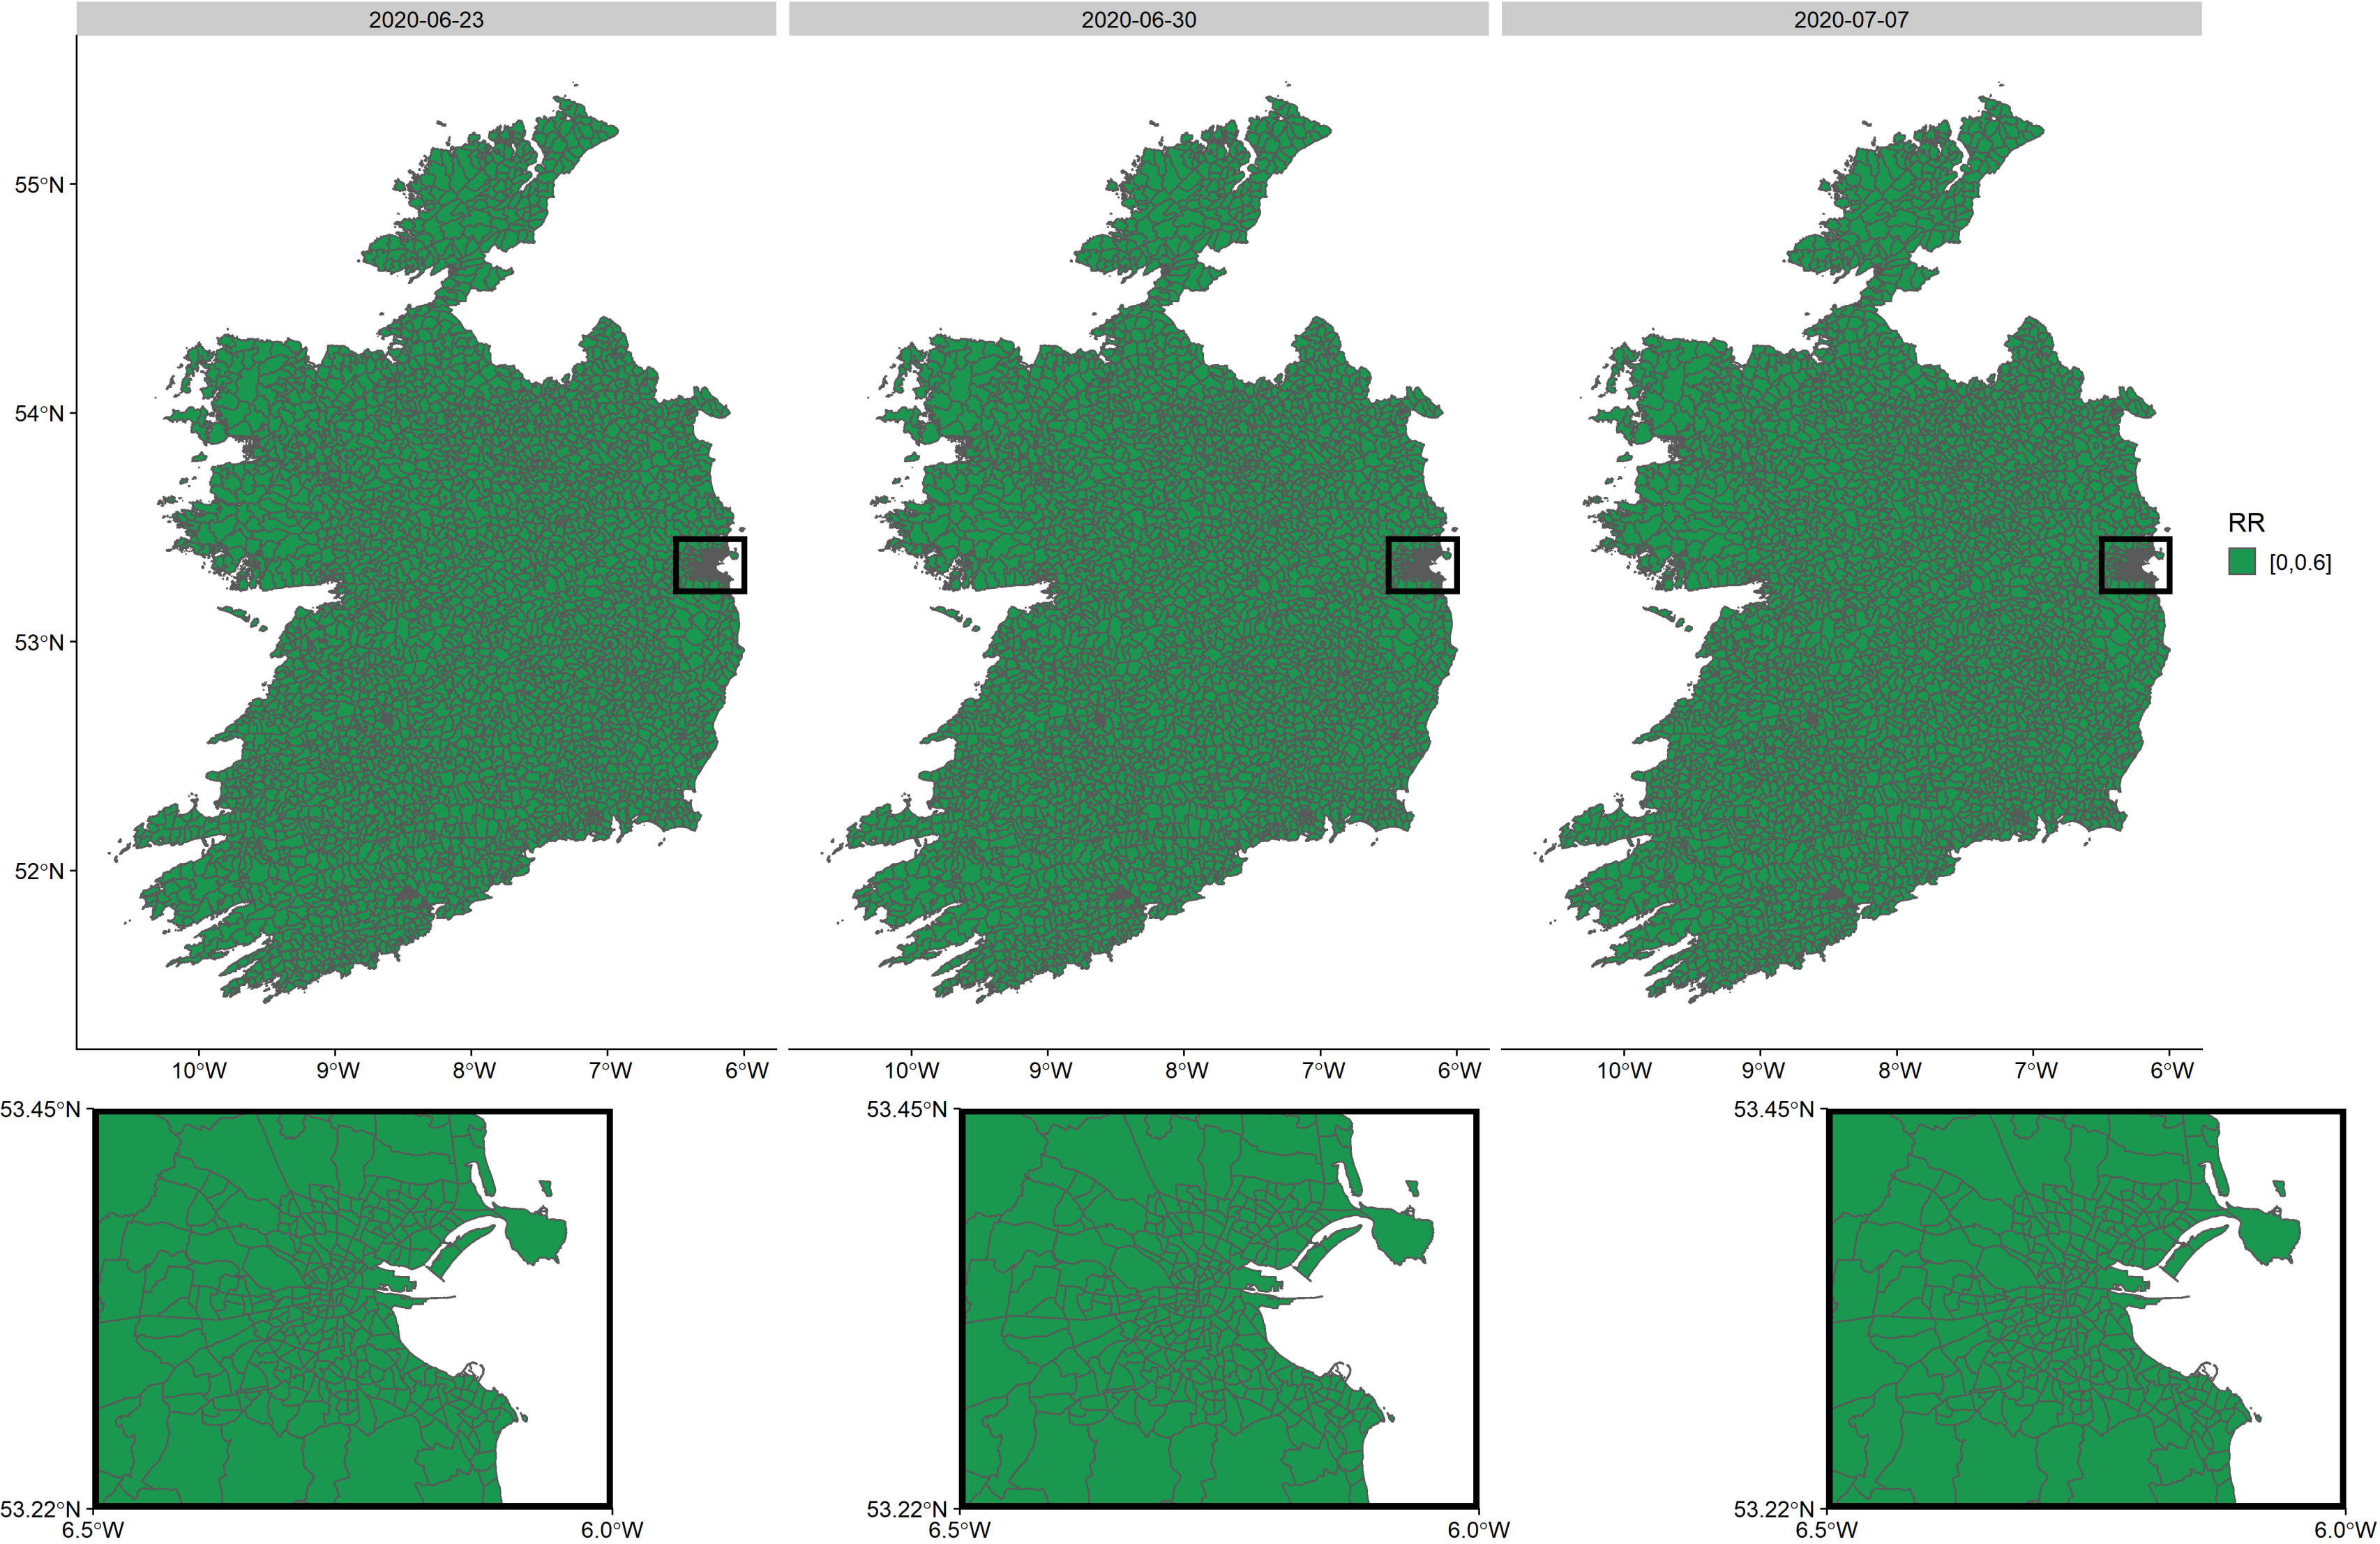

Smoothed RR estimates from BYM model

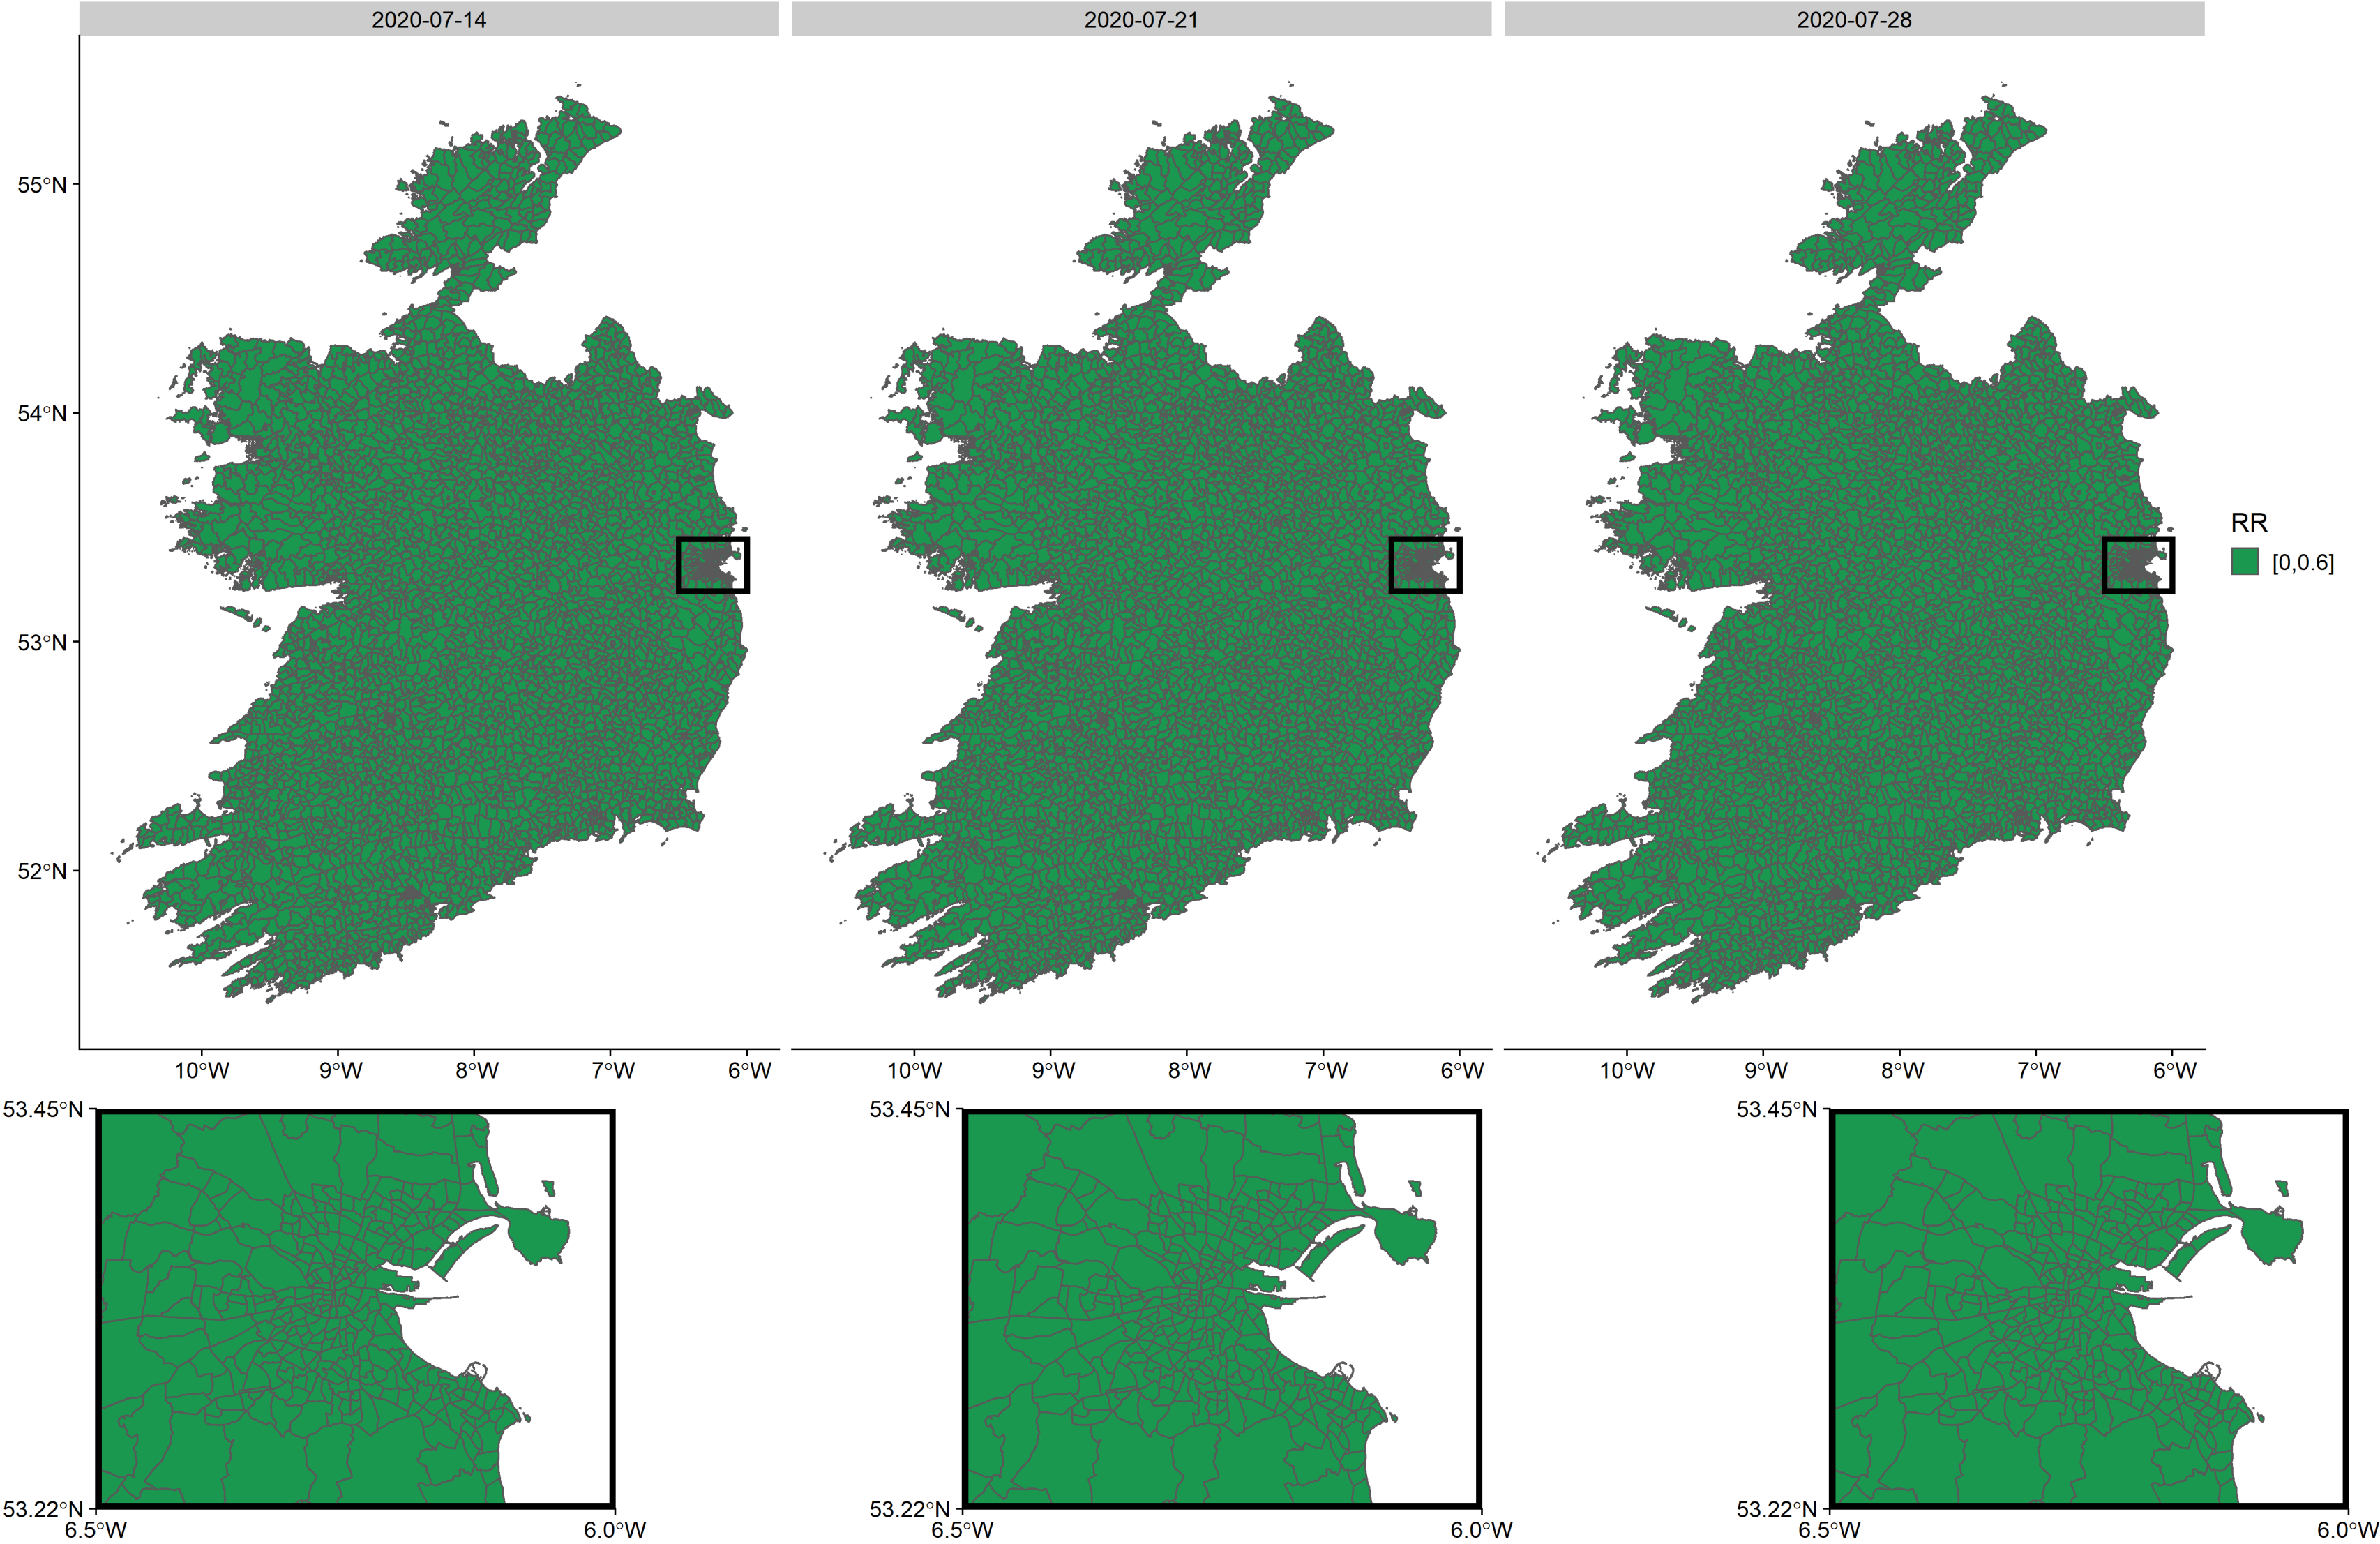

Smoothed RR estimates from BYM model

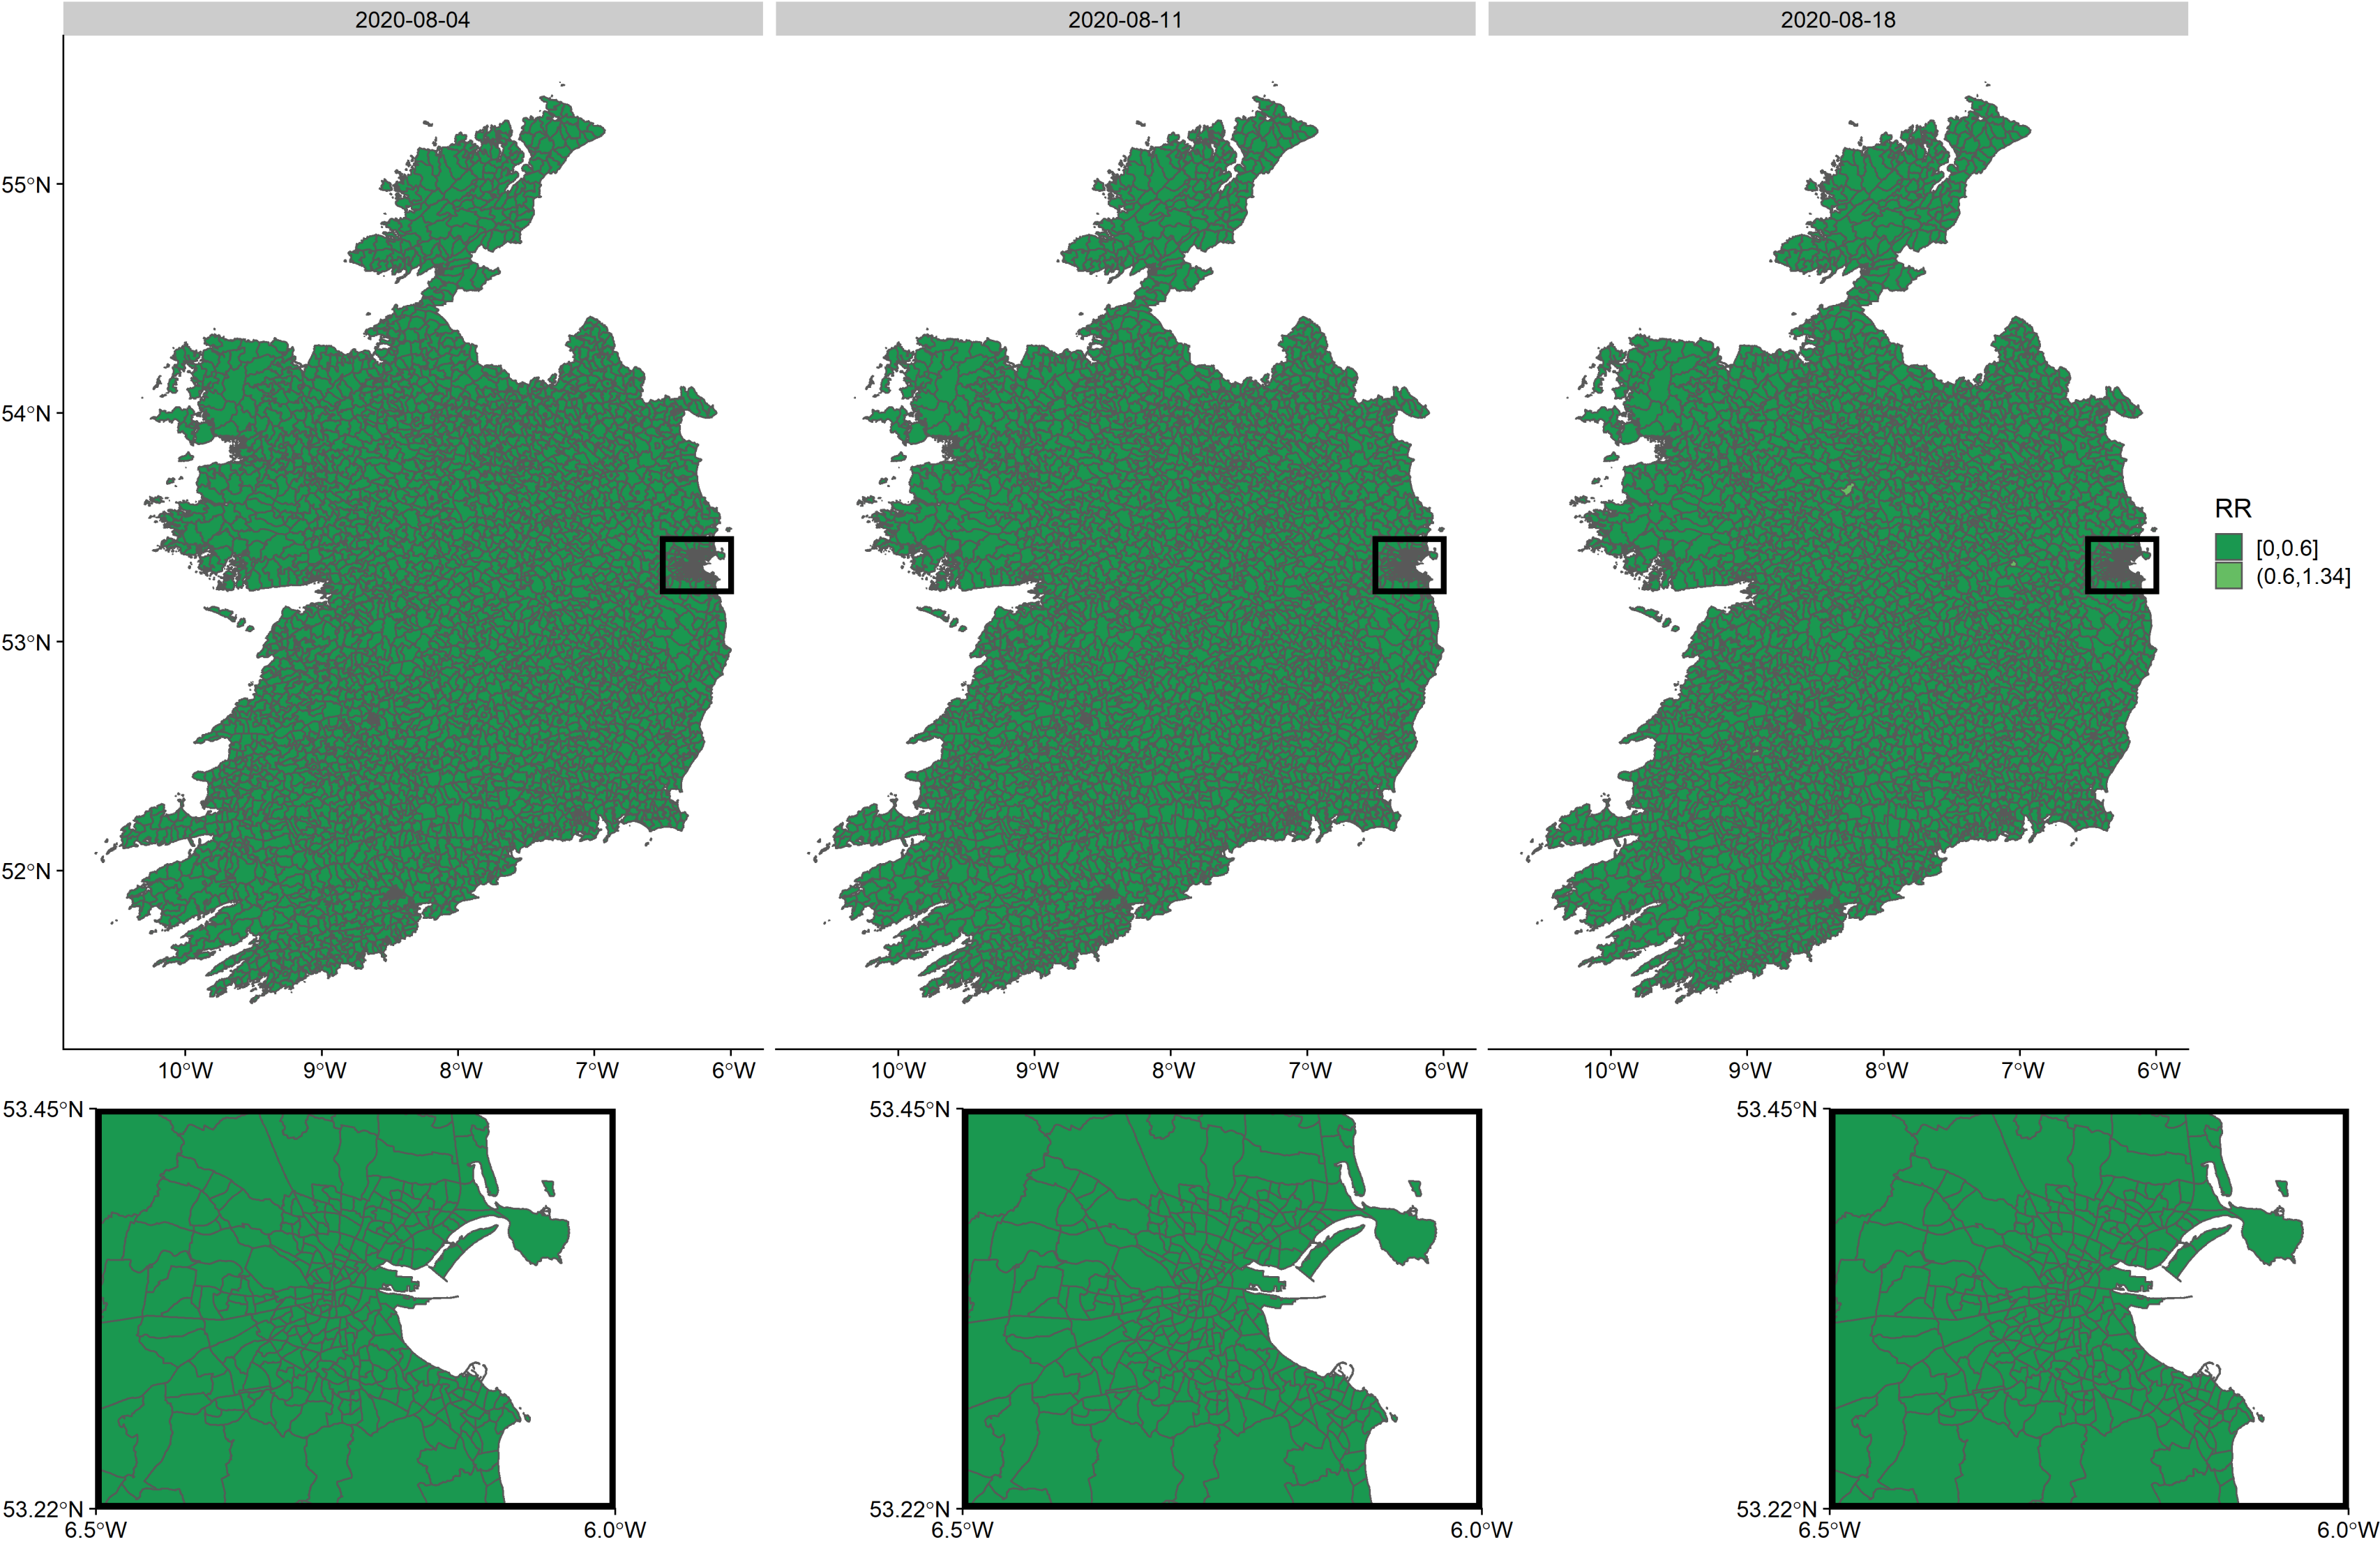

Smoothed RR estimates from BYM model

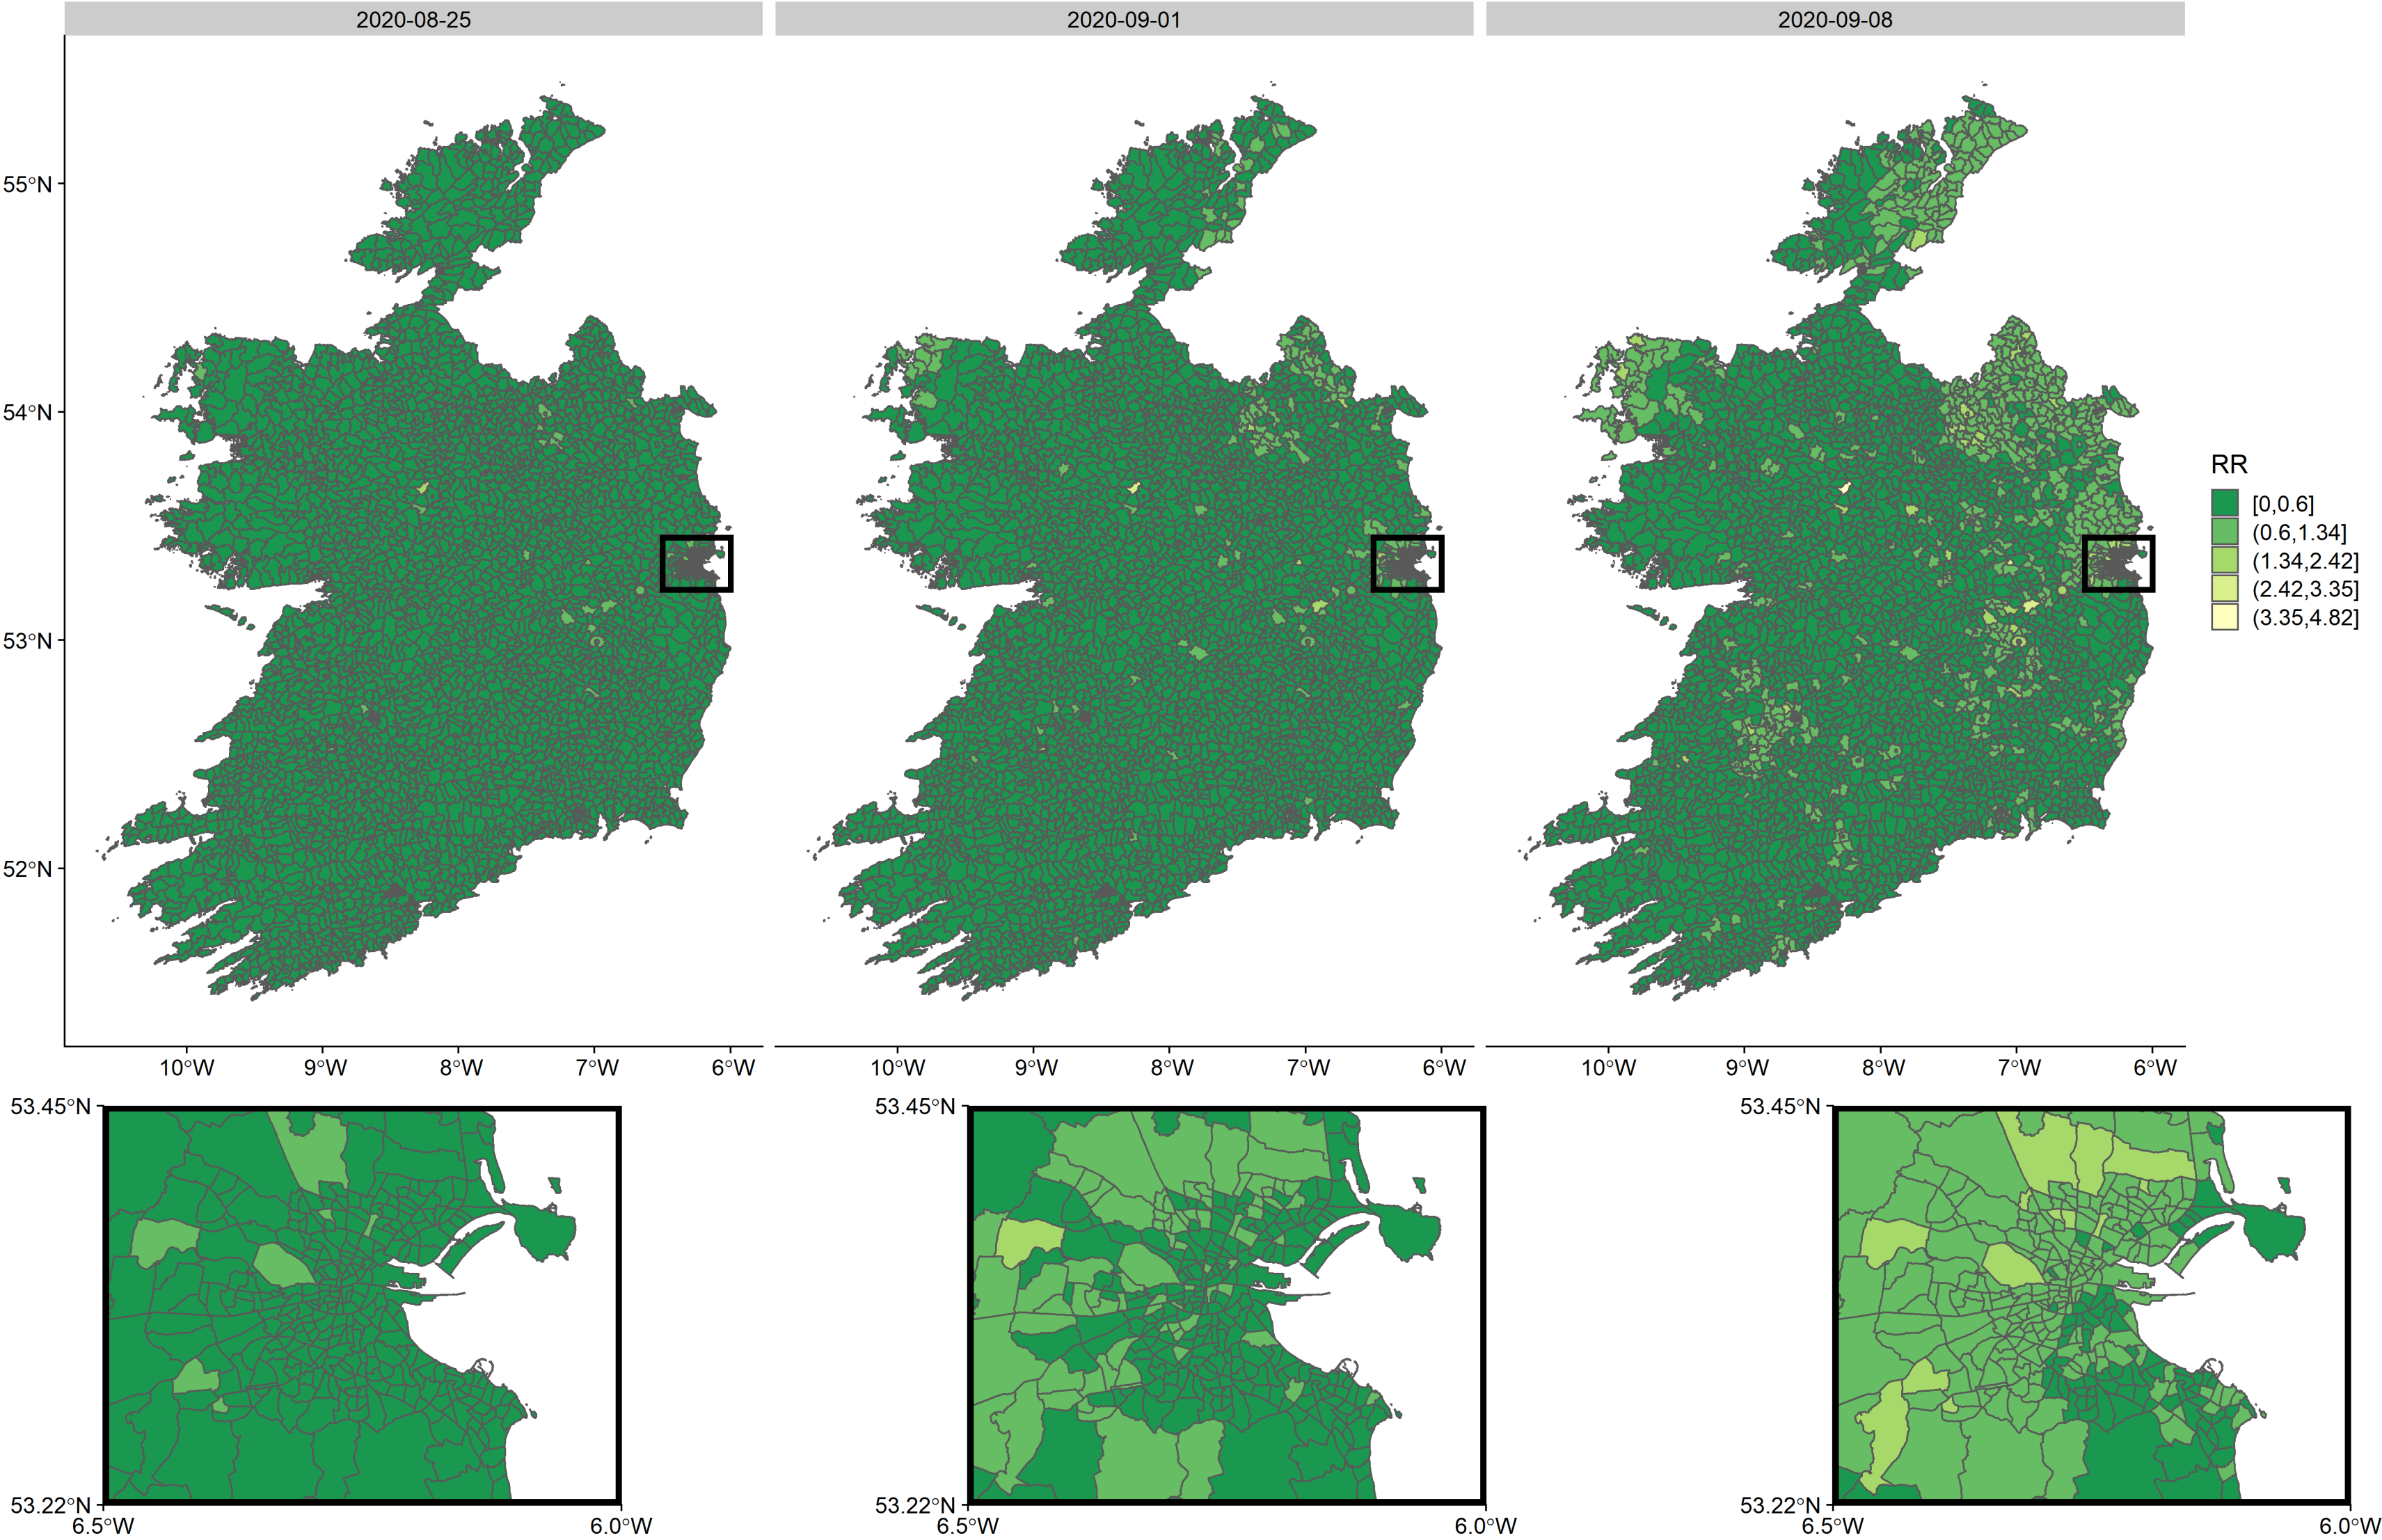

Smoothed RR estimates from BYM model

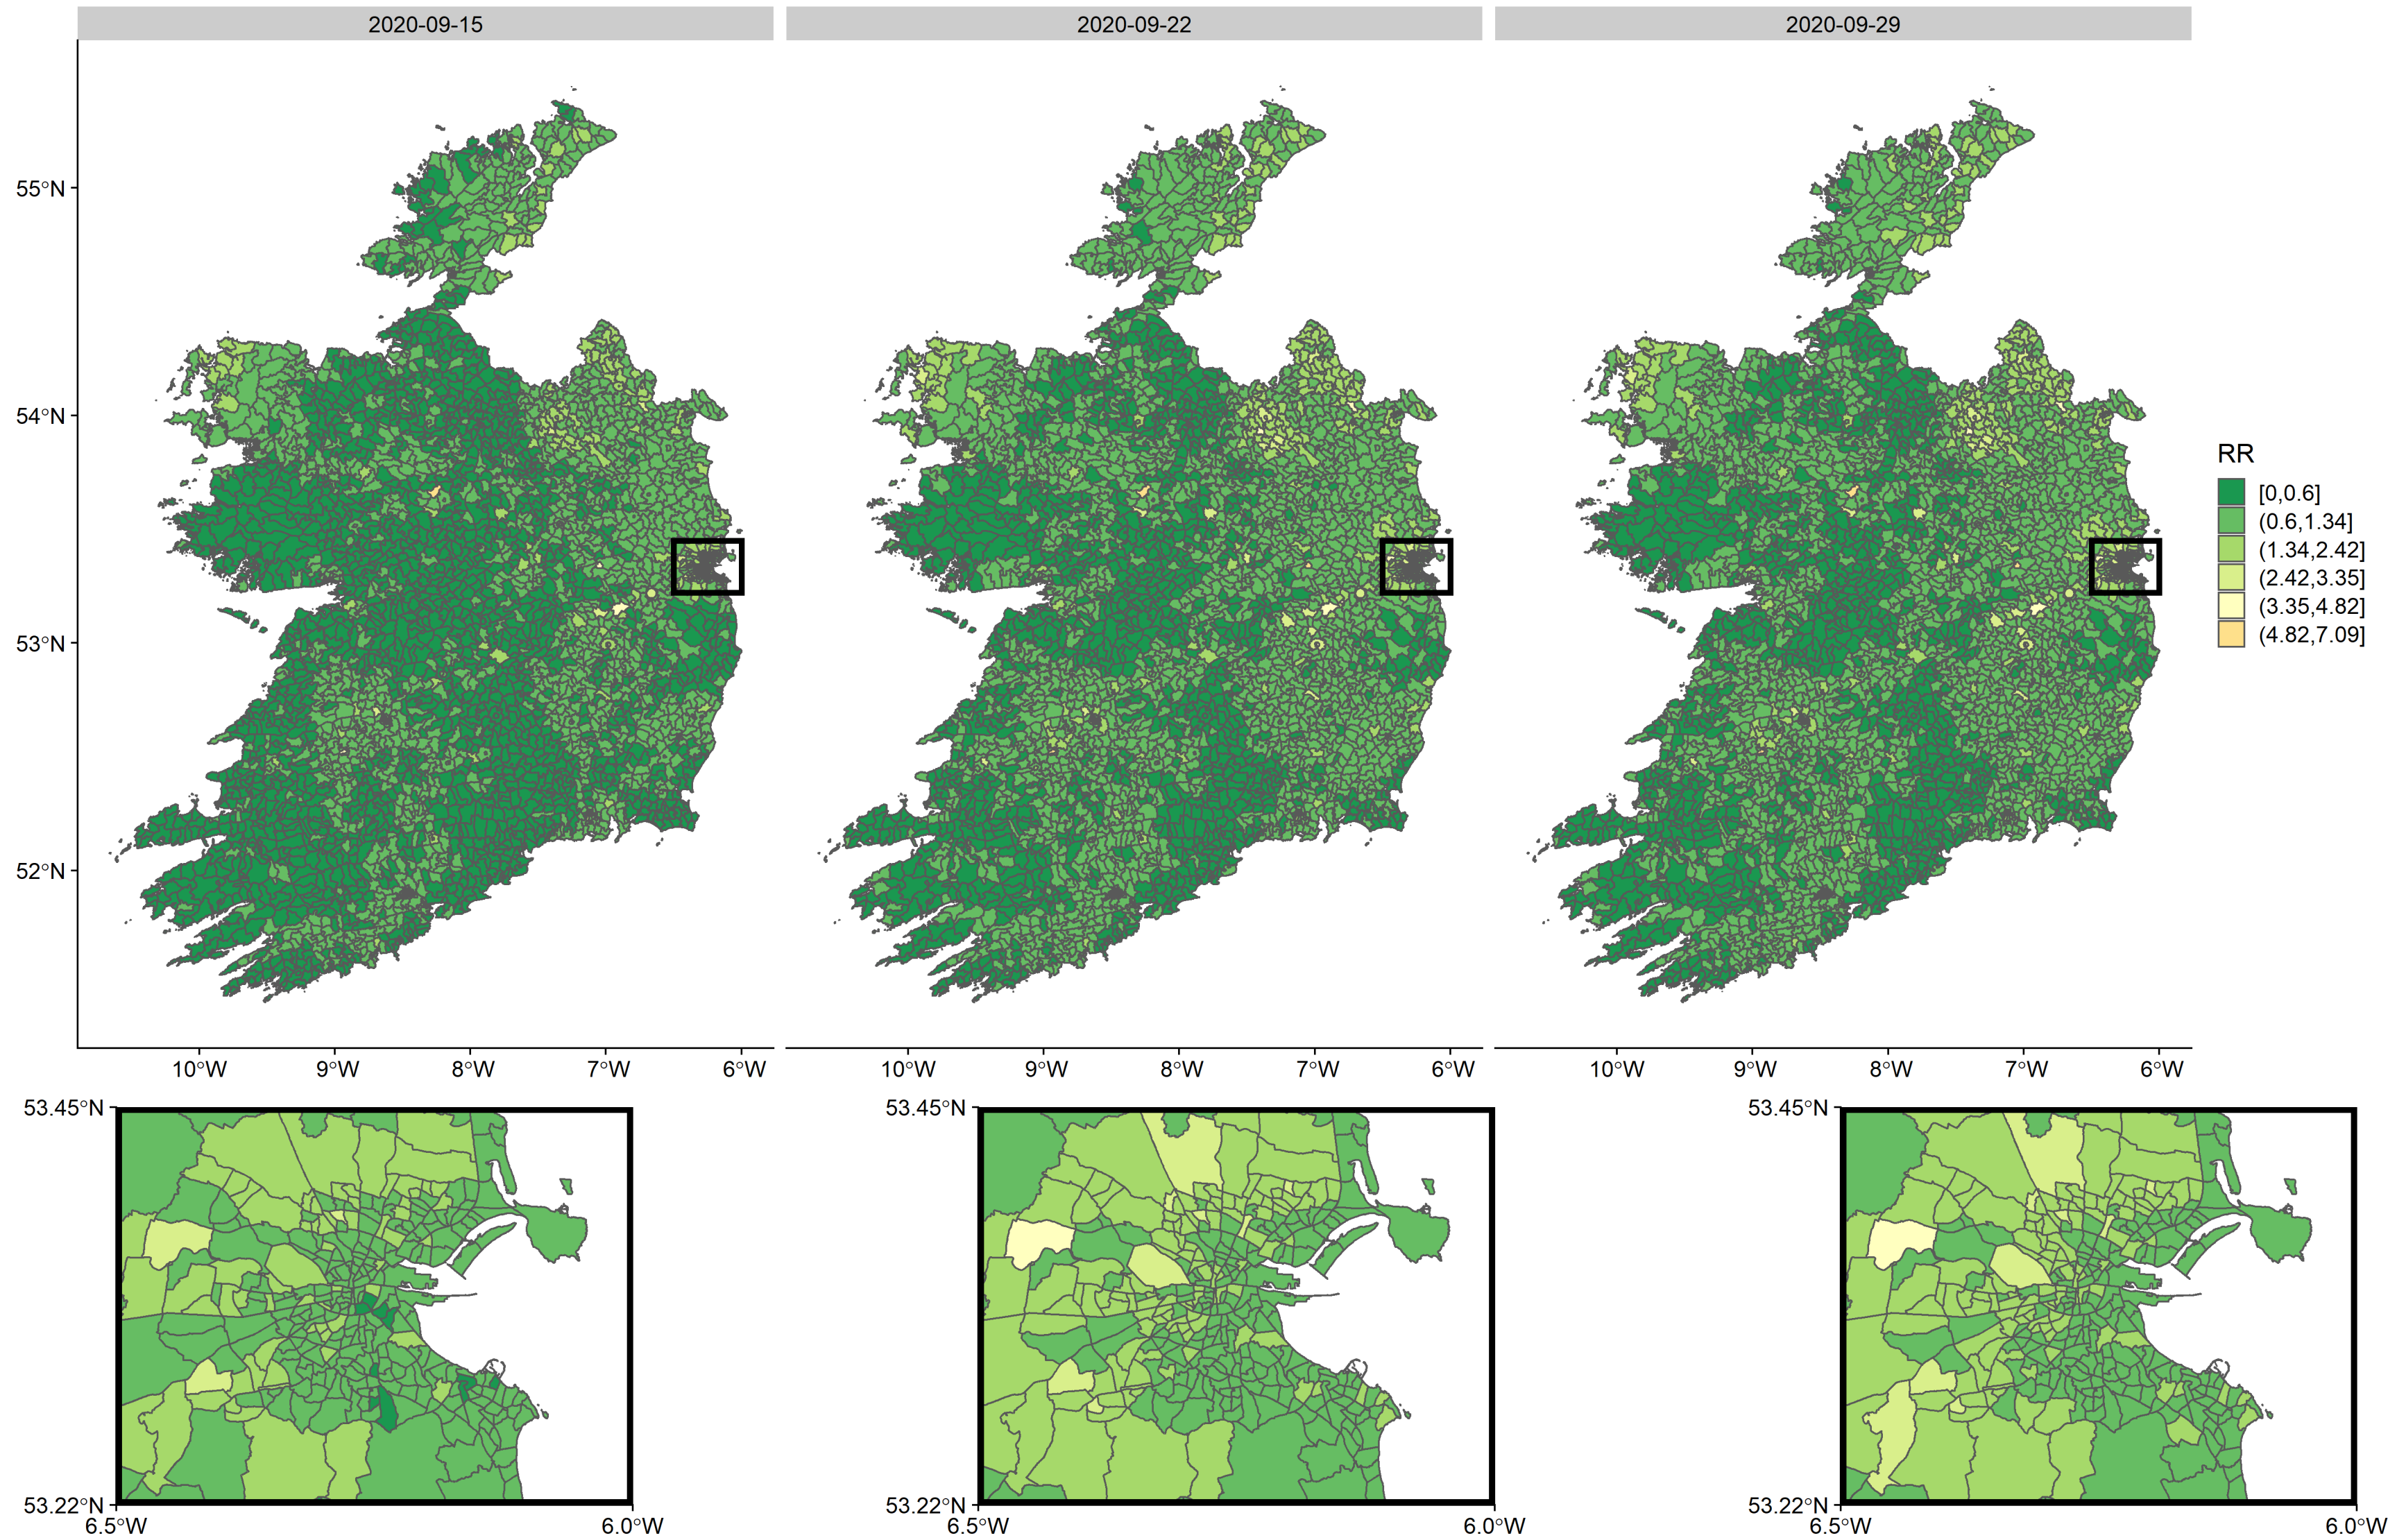

Smoothed RR estimates from BYM model

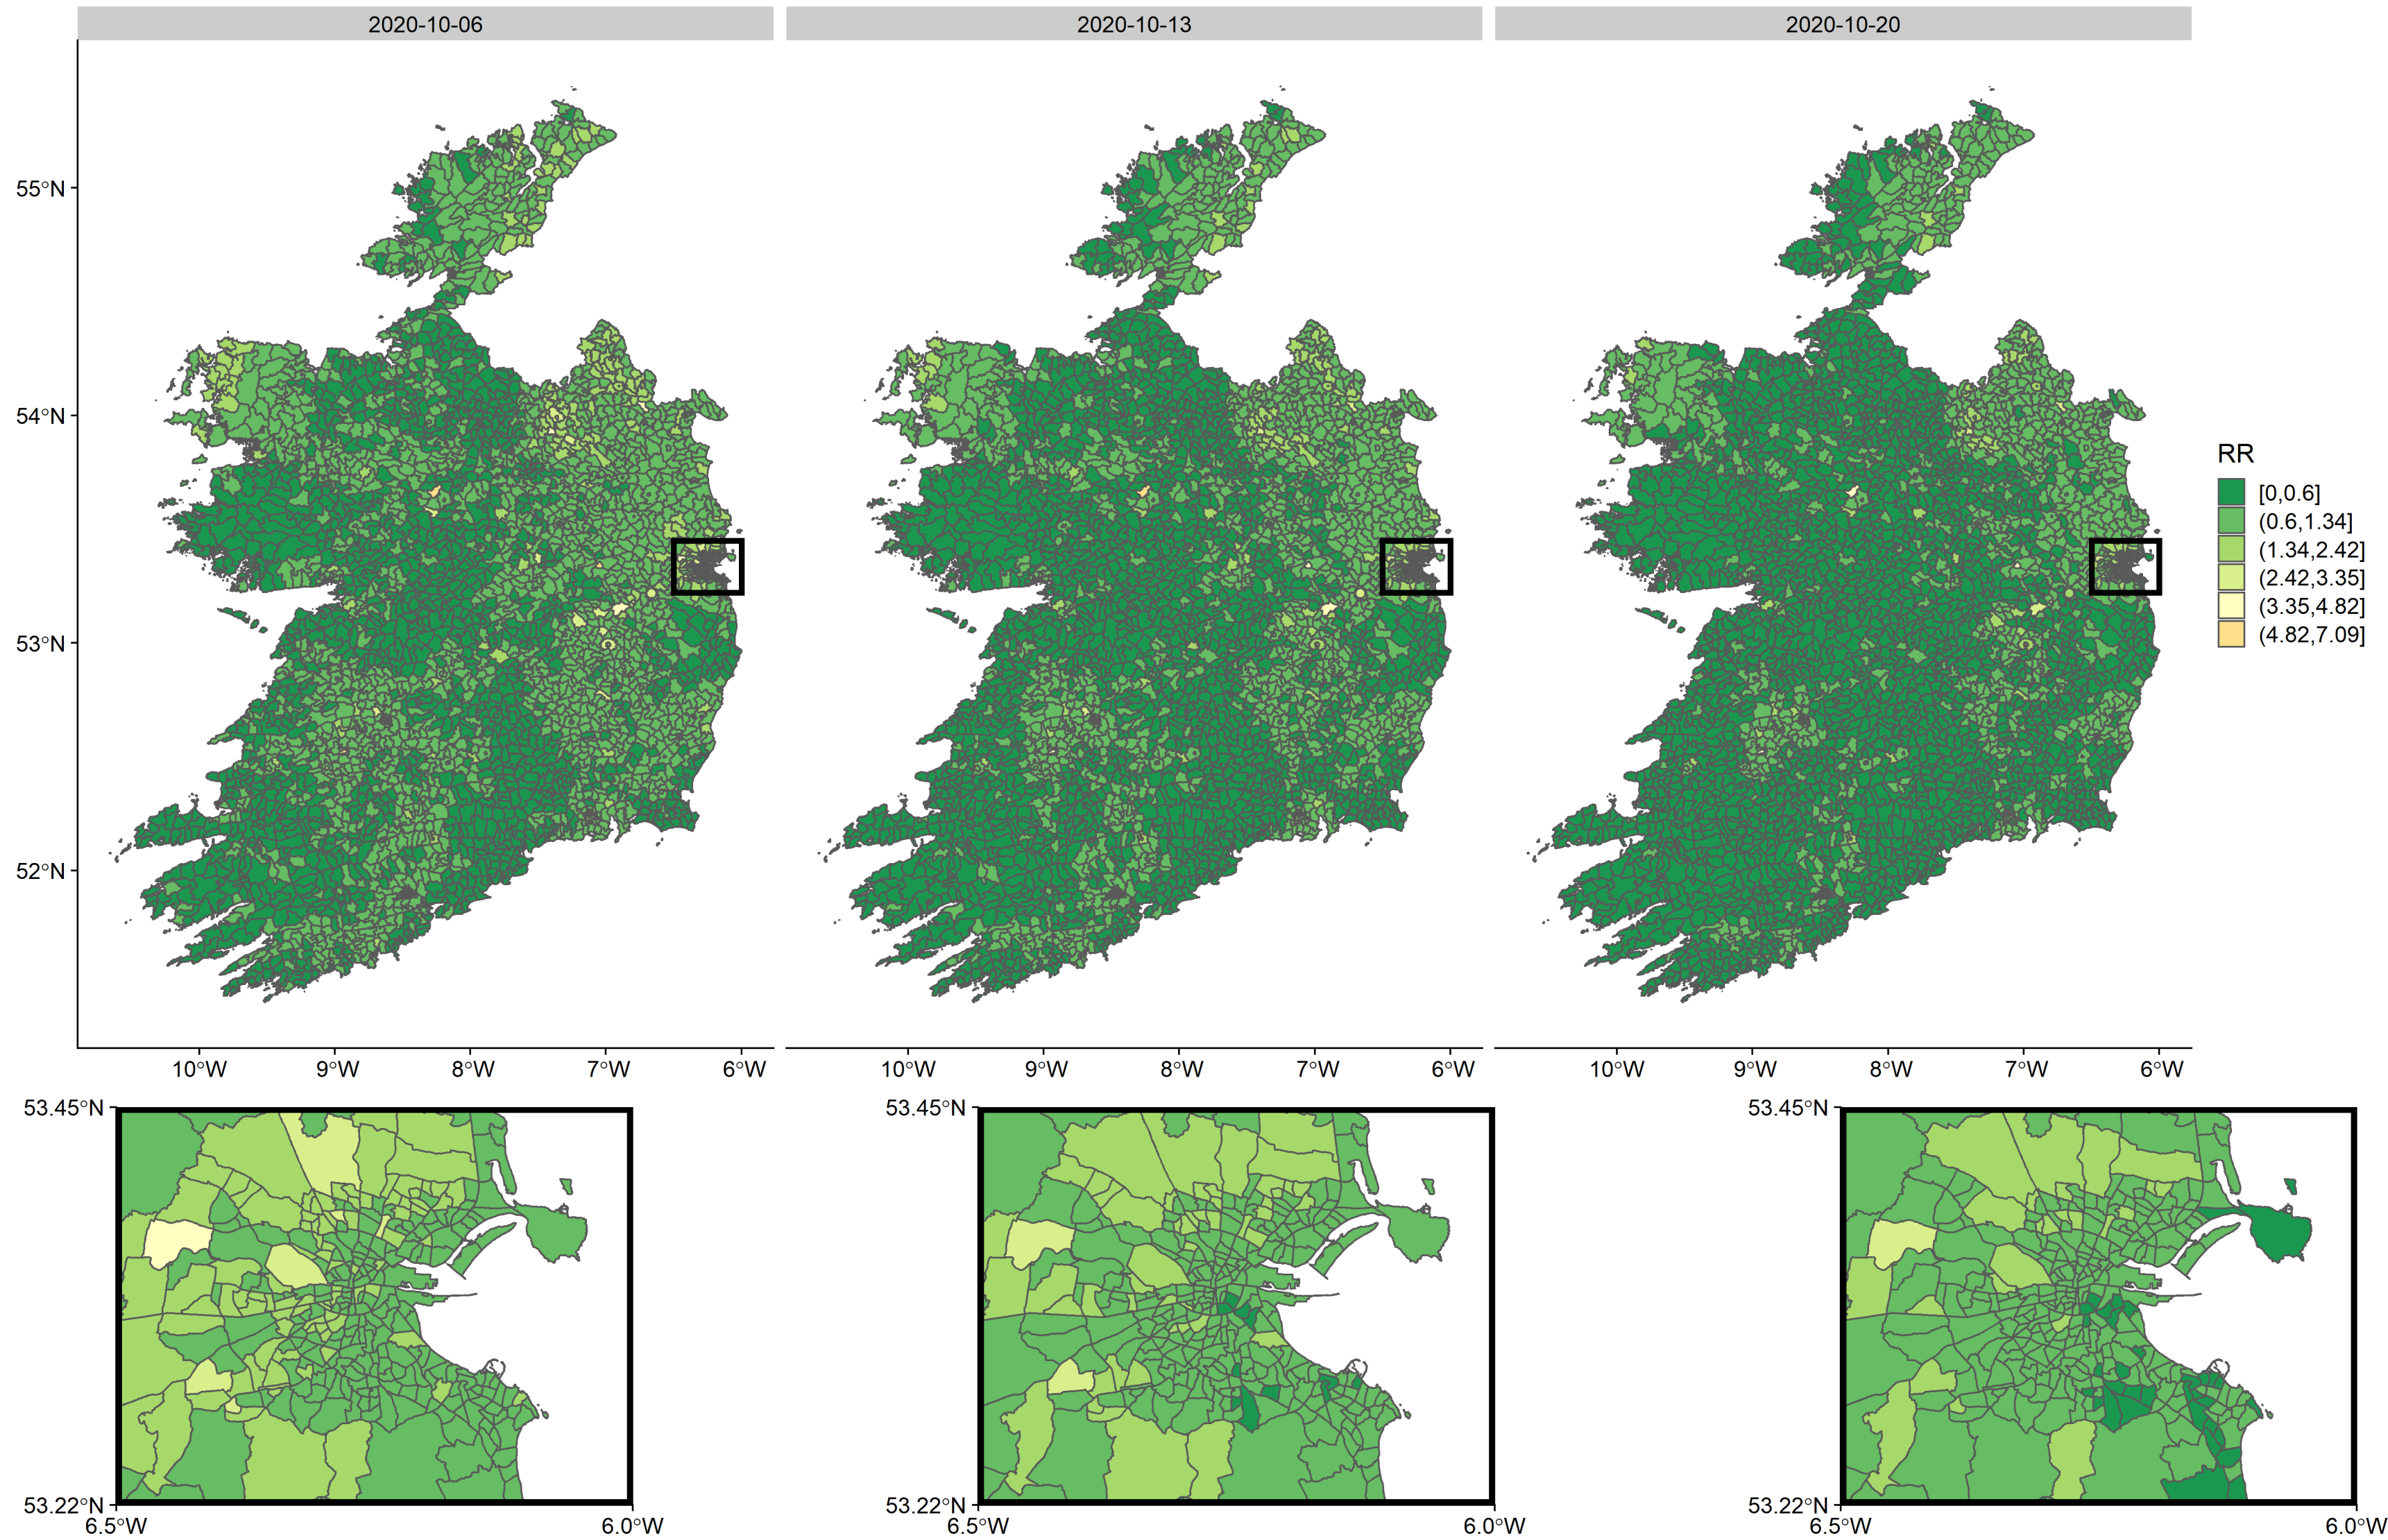

Smoothed RR estimates from BYM model

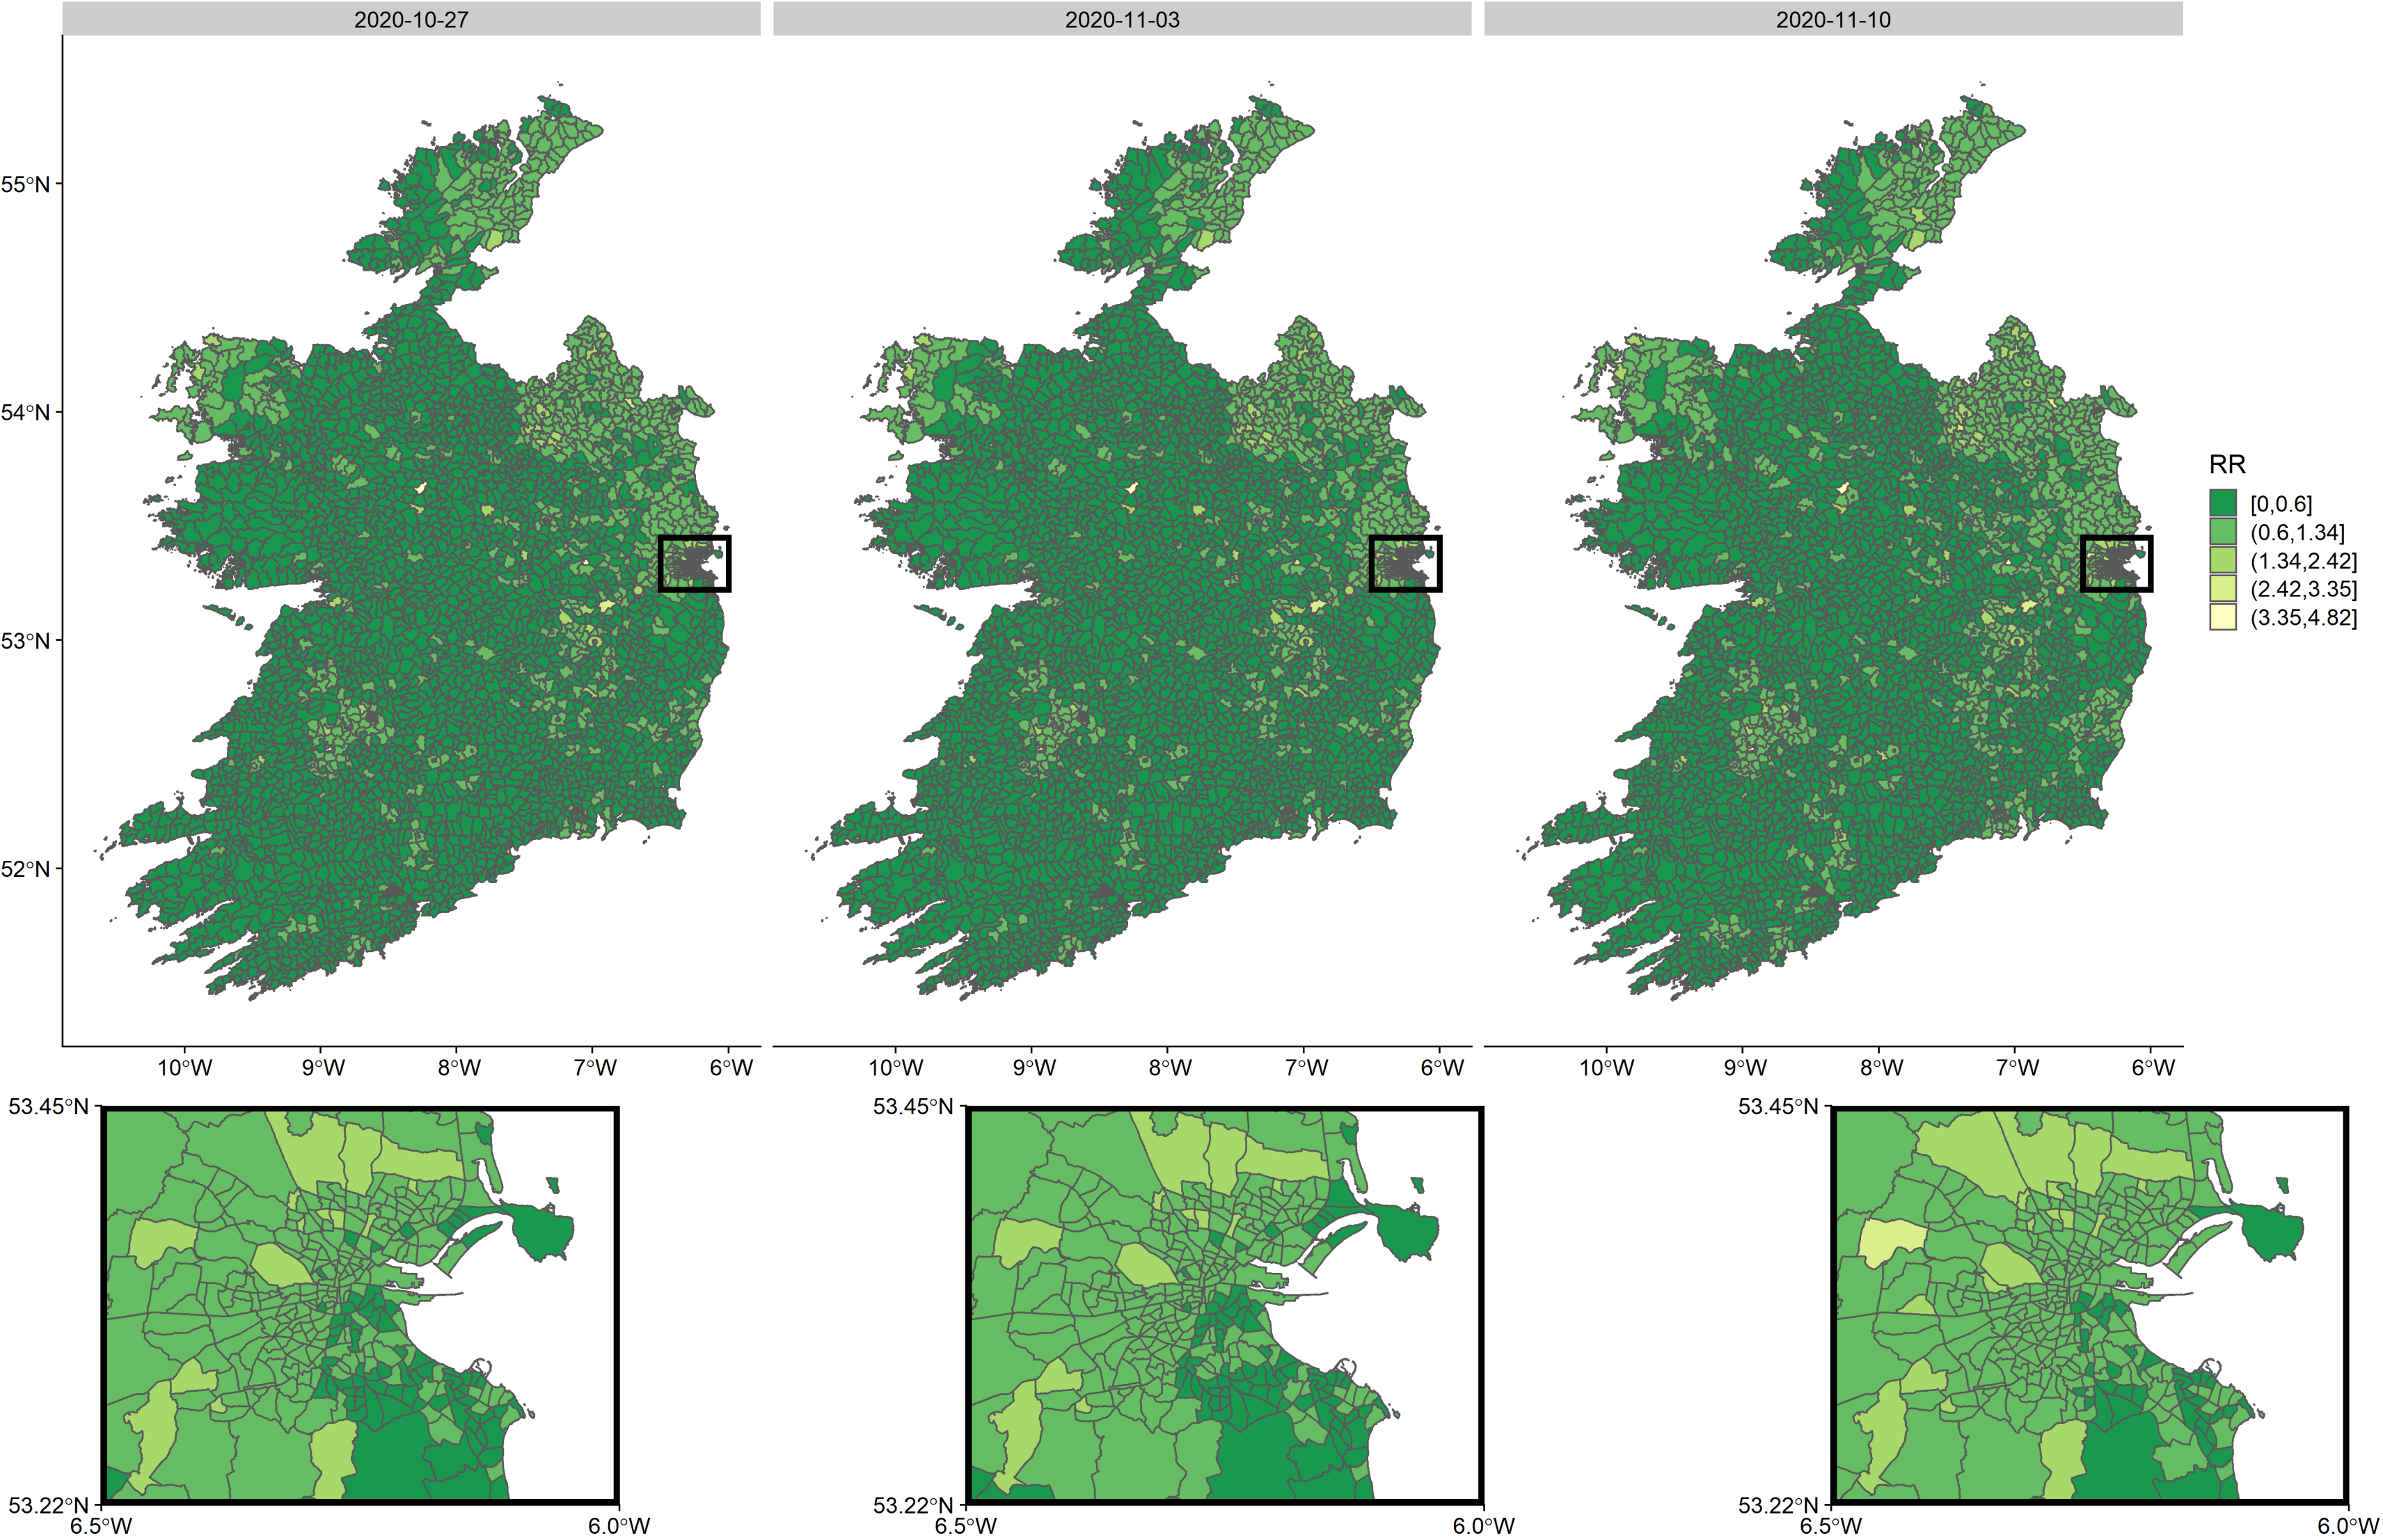

Smoothed RR estimates from BYM model

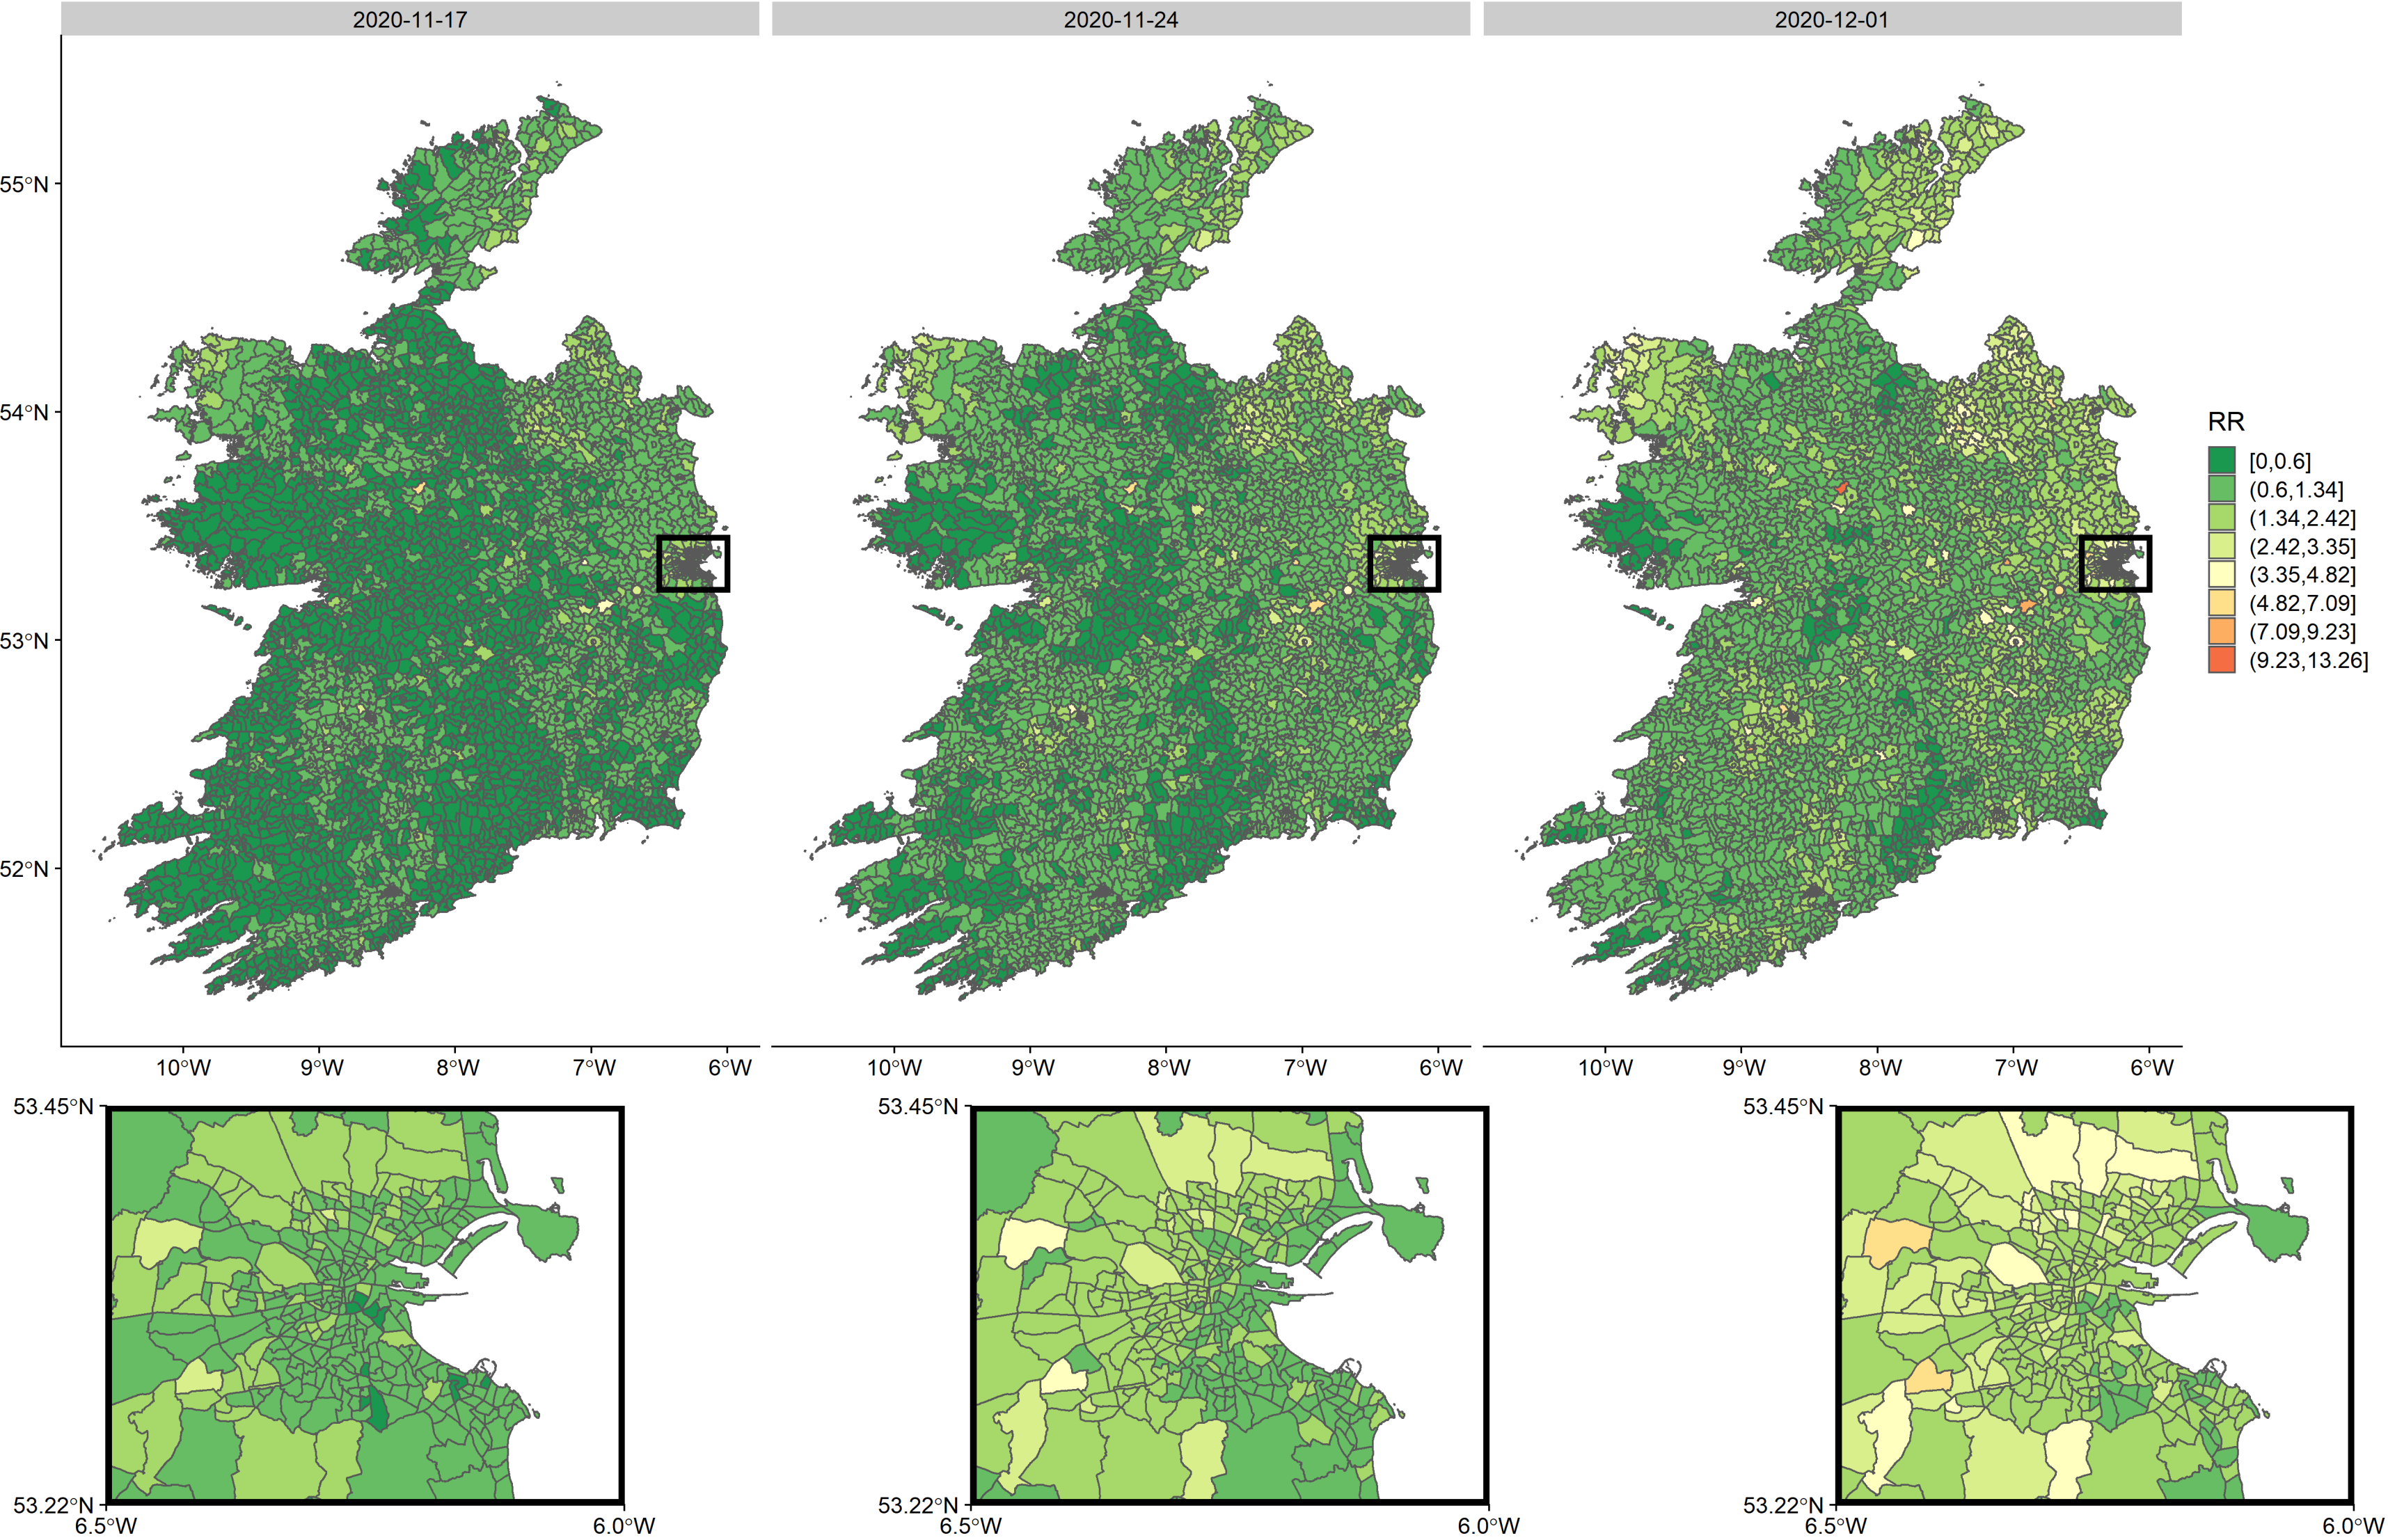

Smoothed RR estimates from BYM model

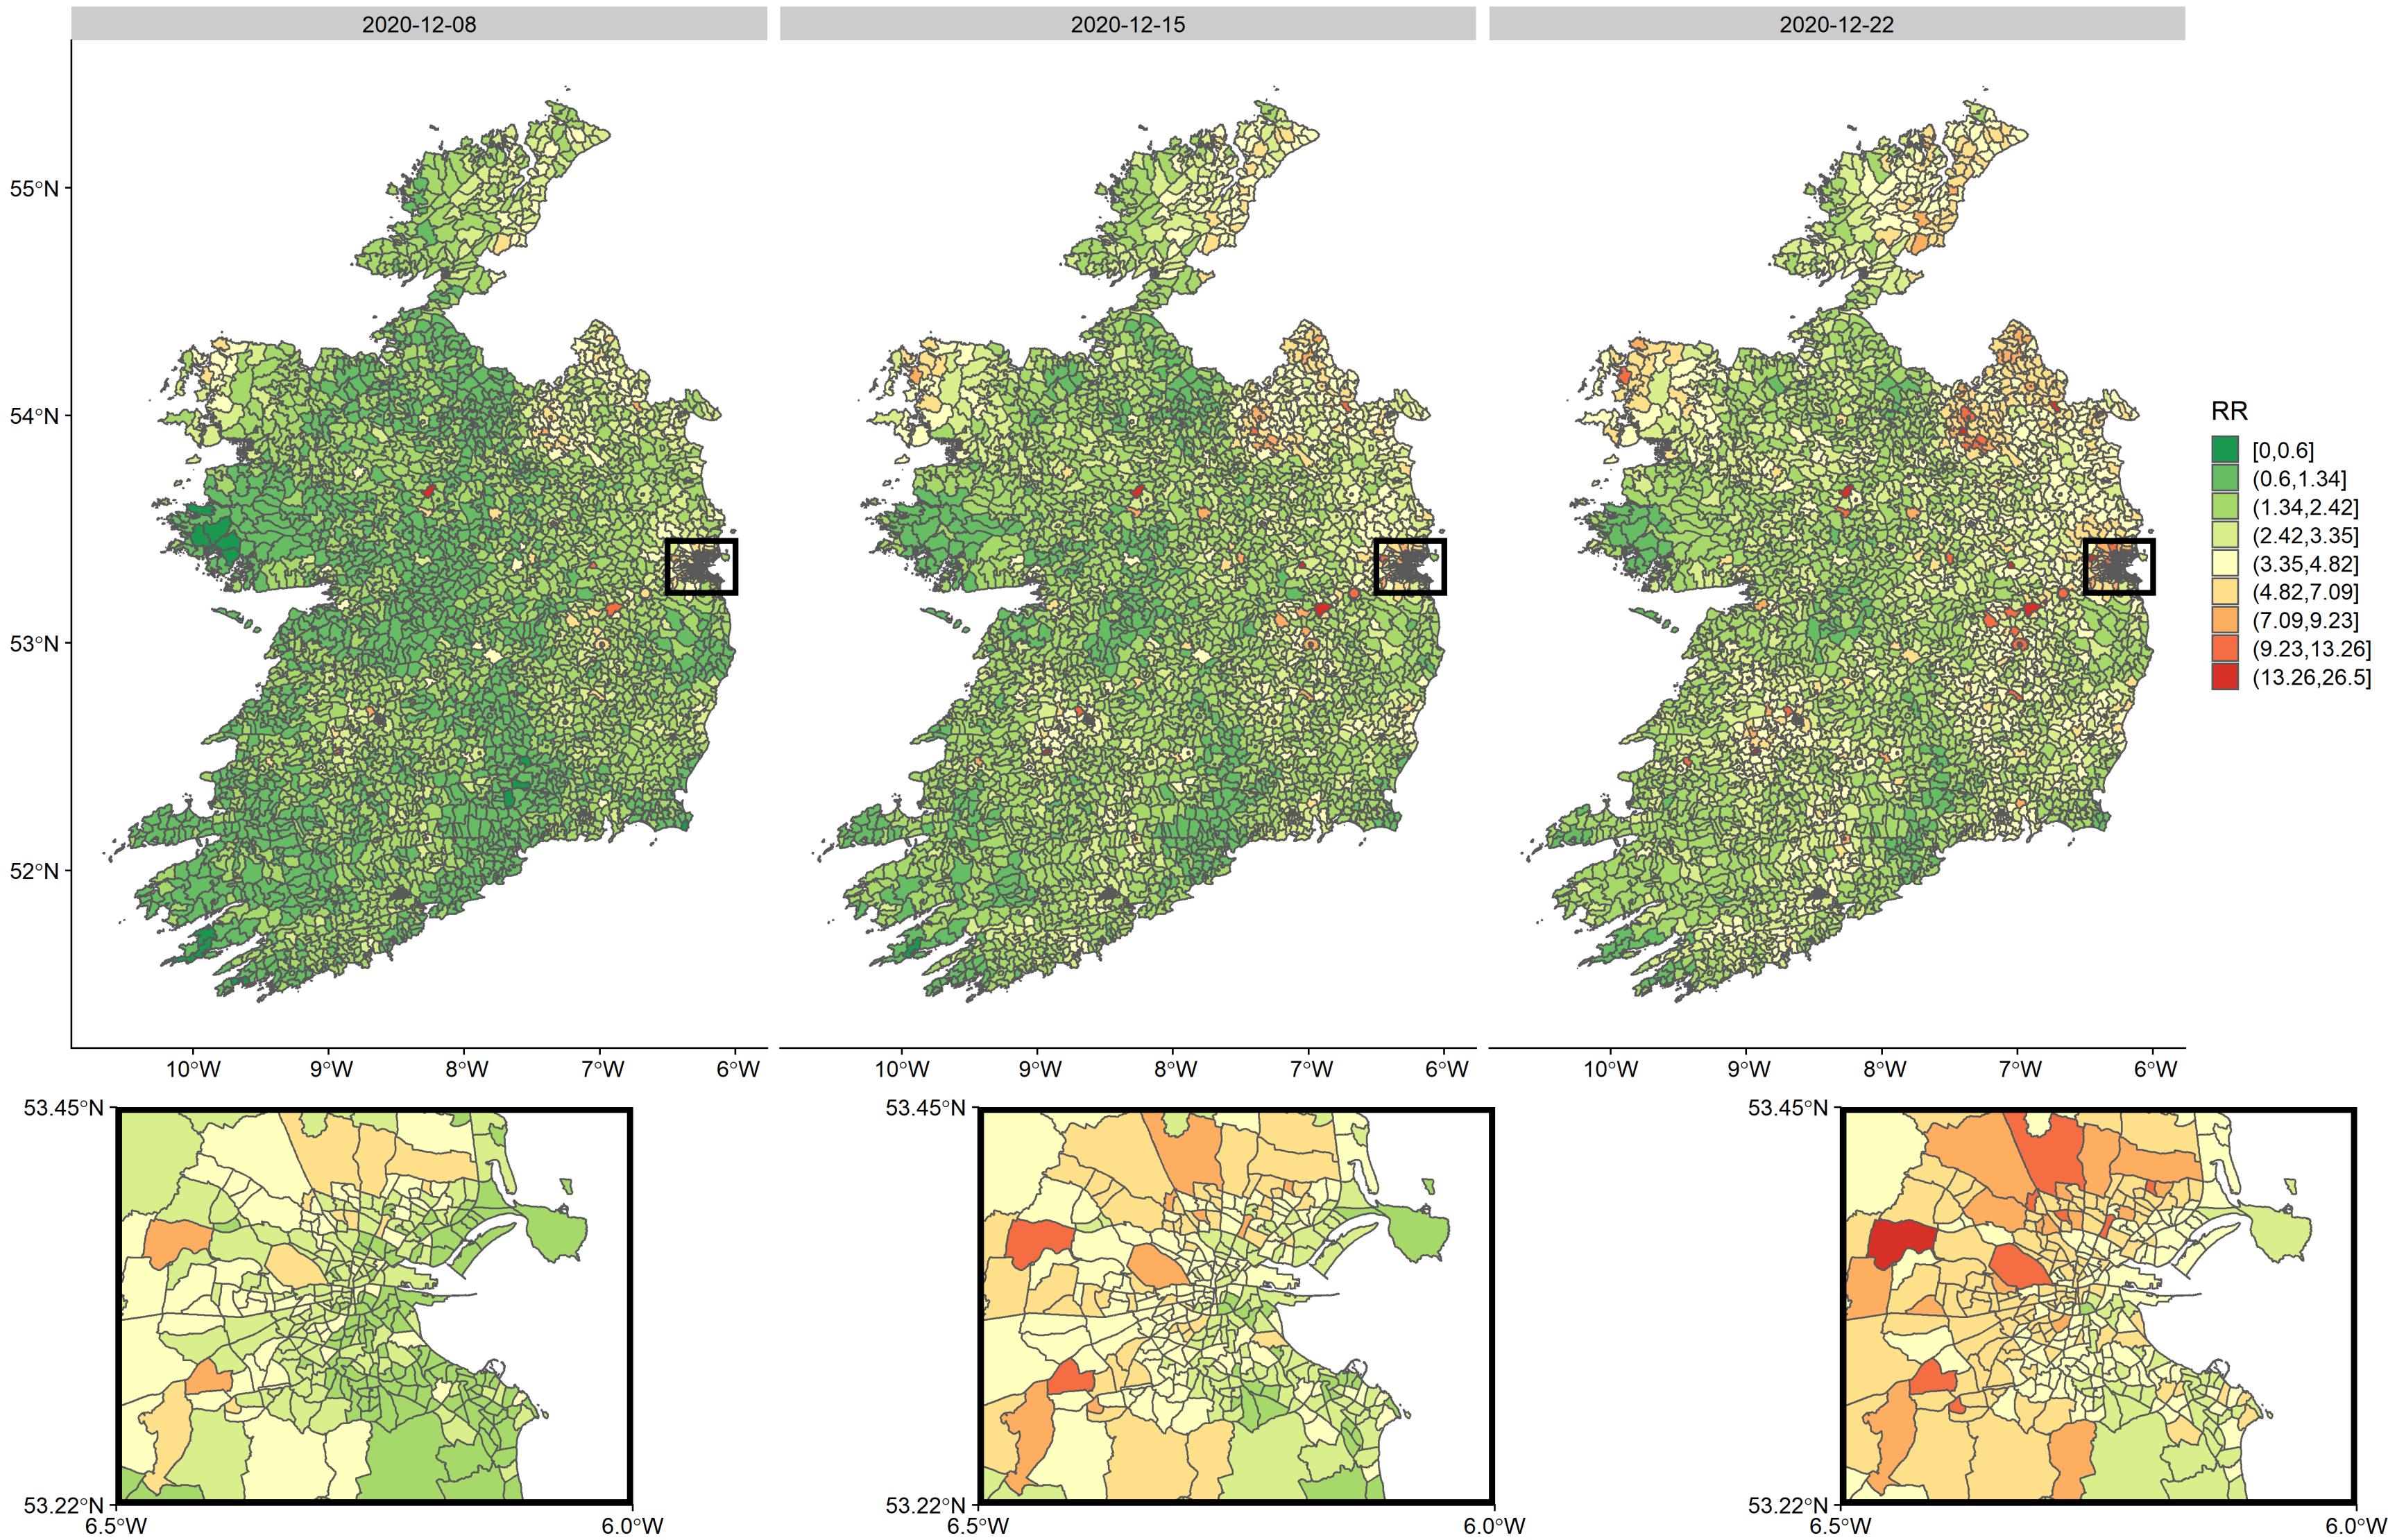

Smoothed RR estimates from BYM model

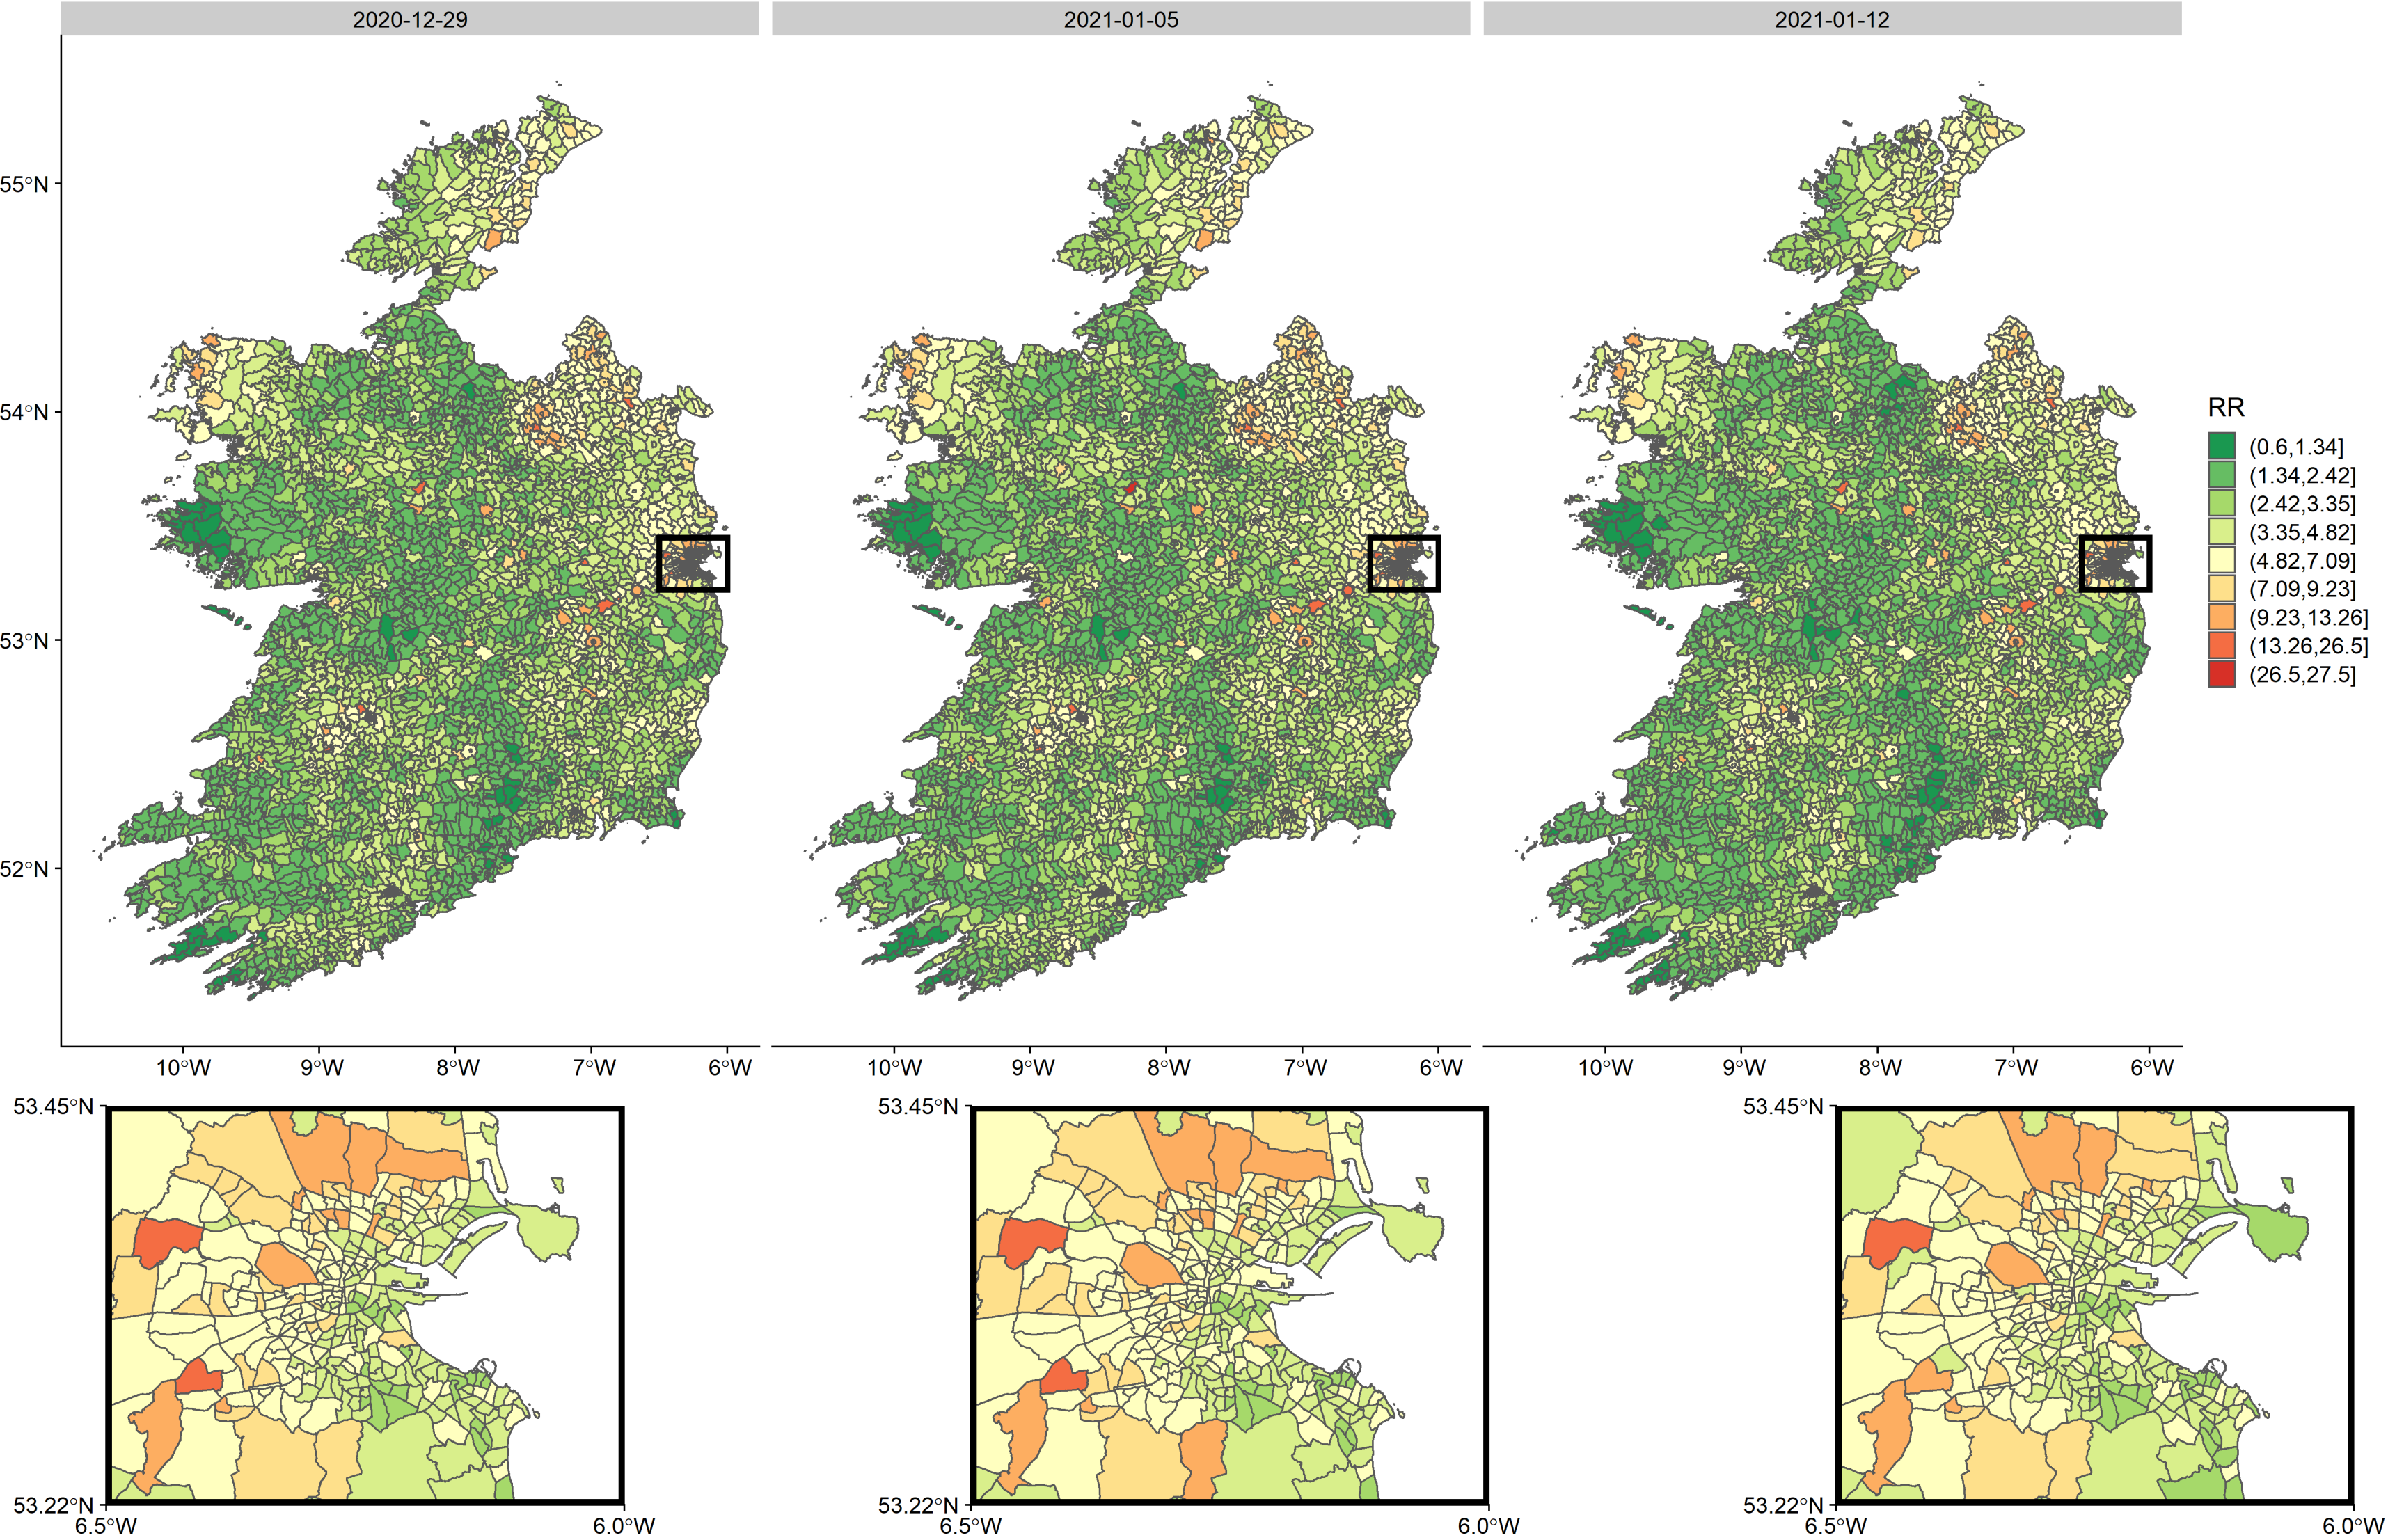

Smoothed RR estimates from BYM model

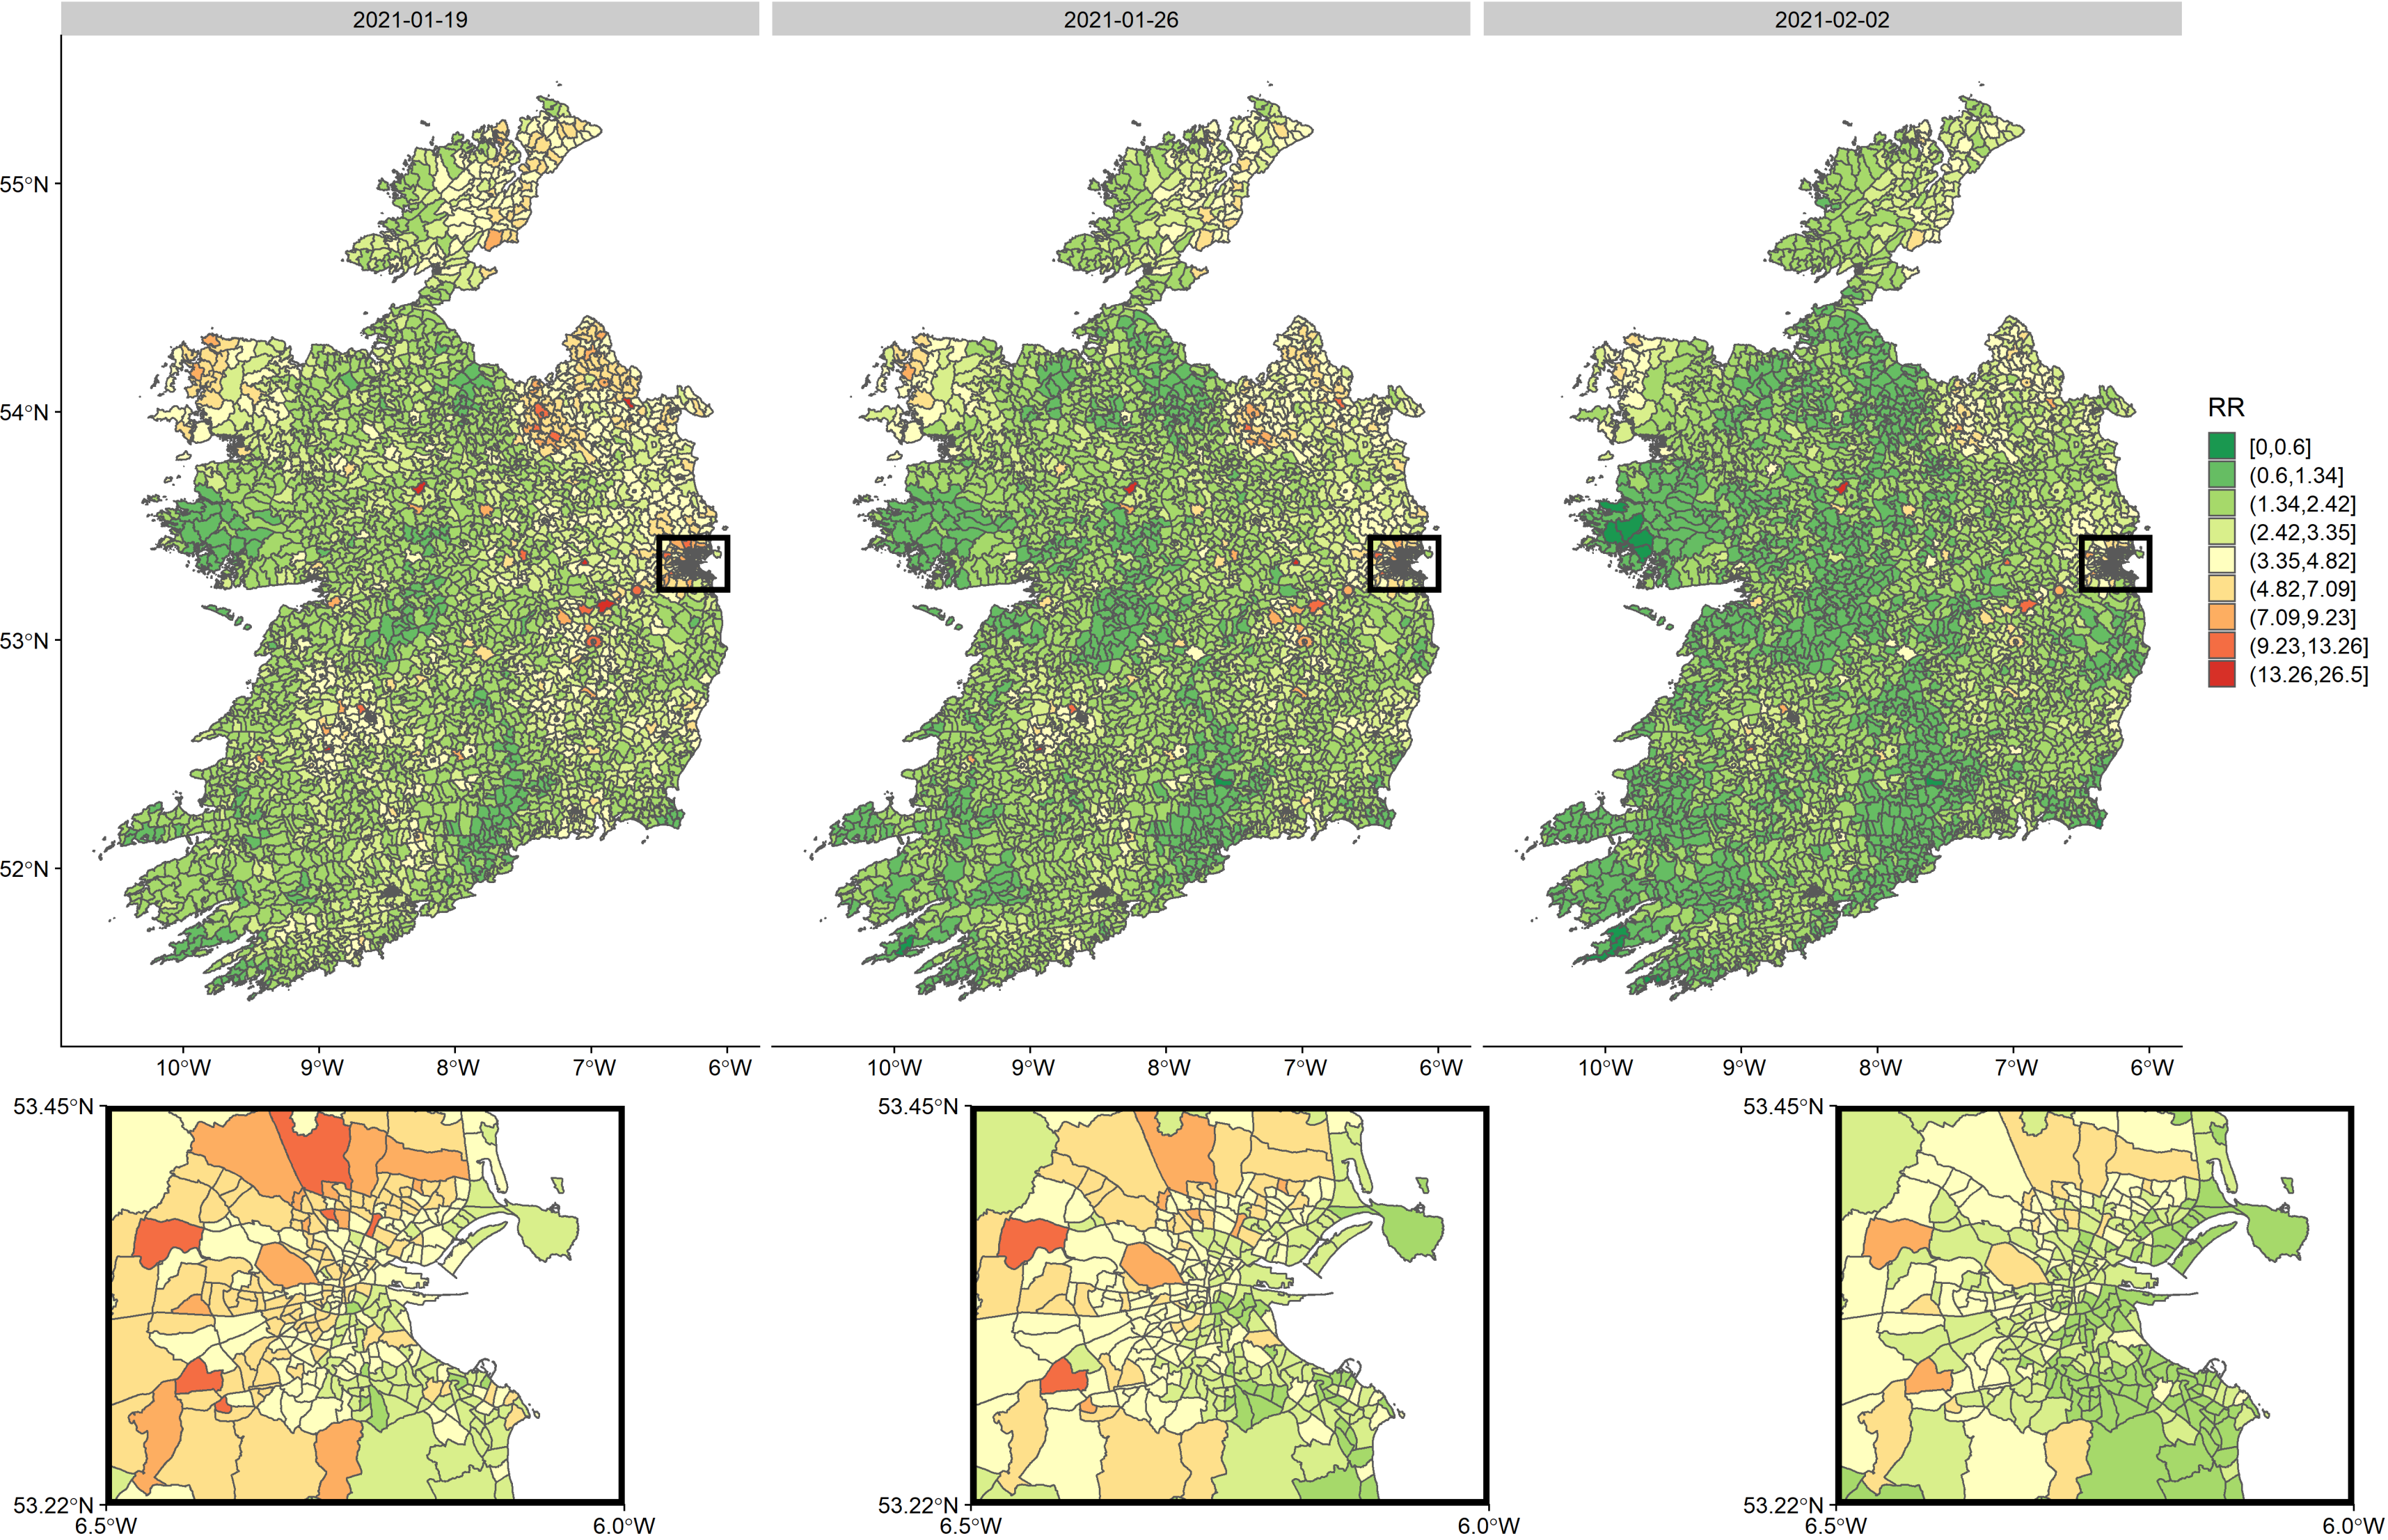

Smoothed RR estimates from BYM model

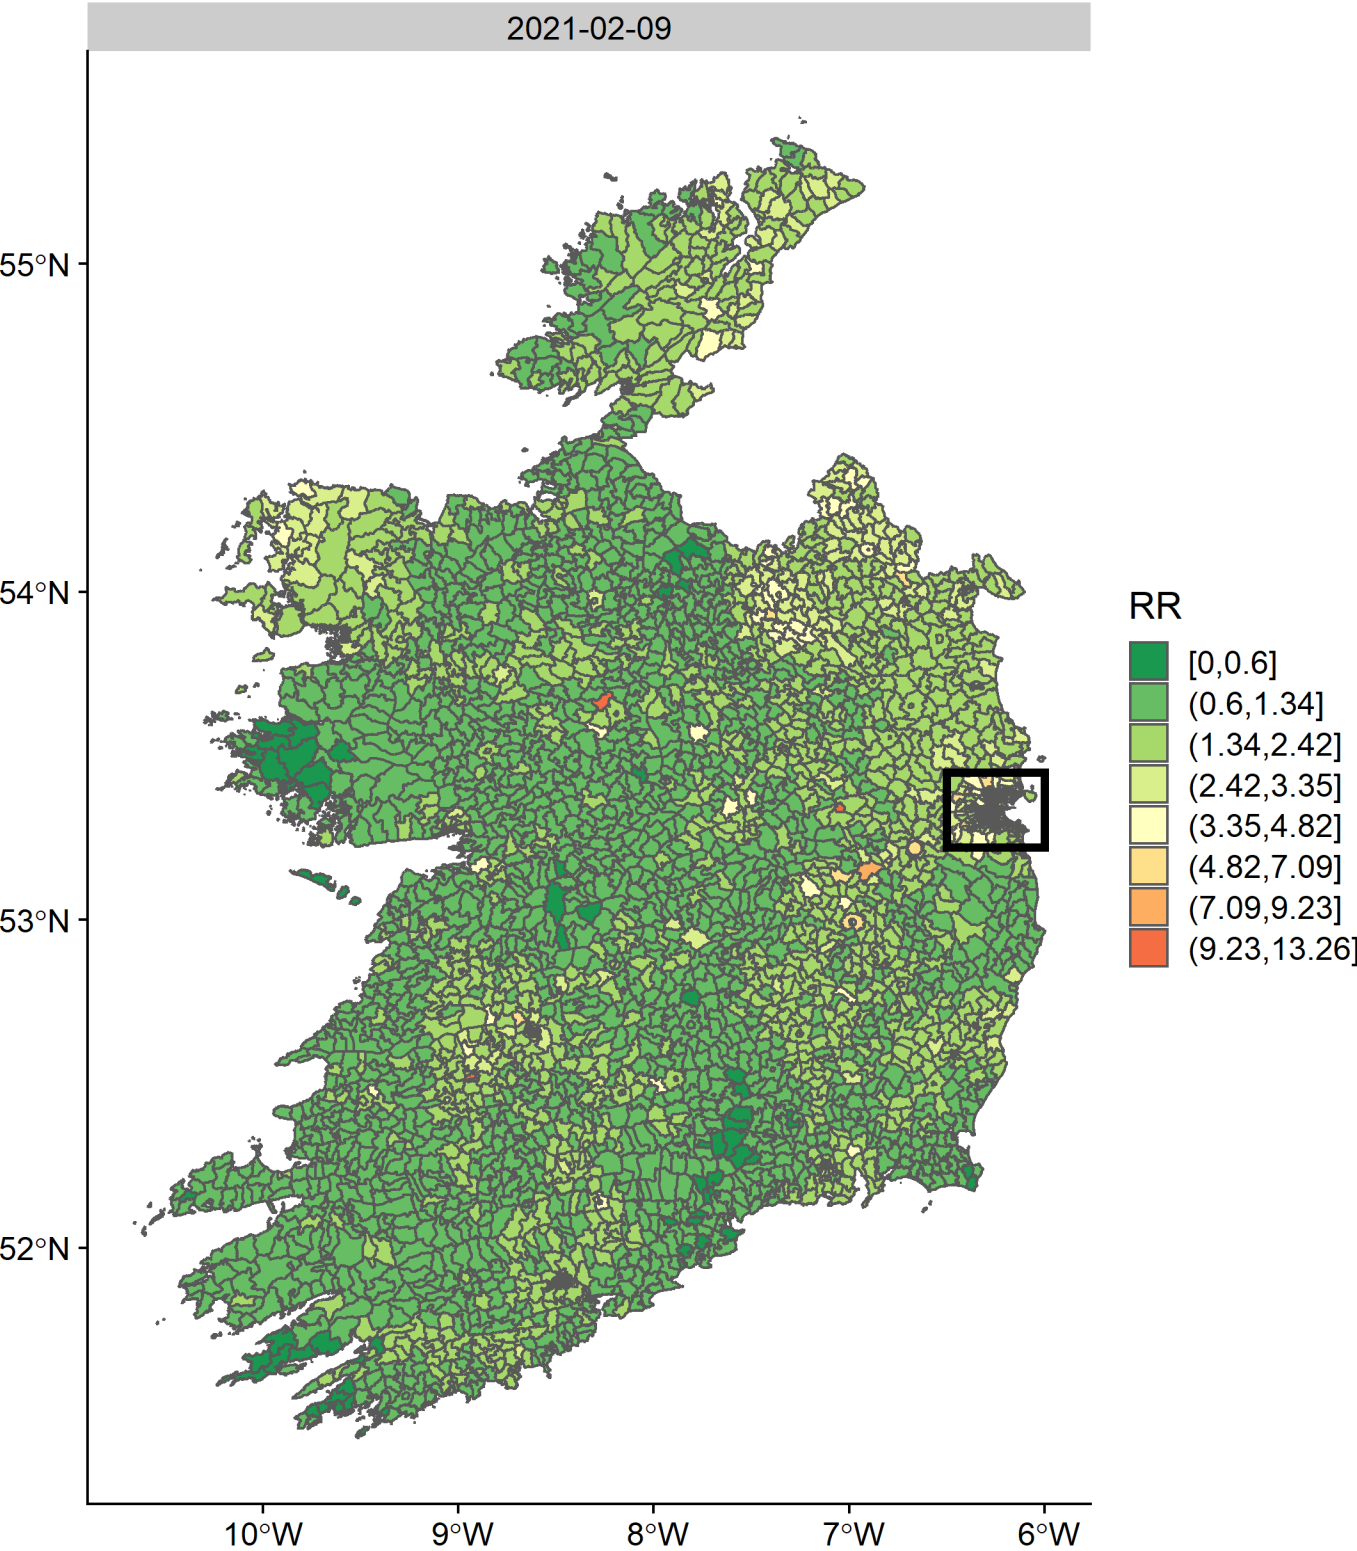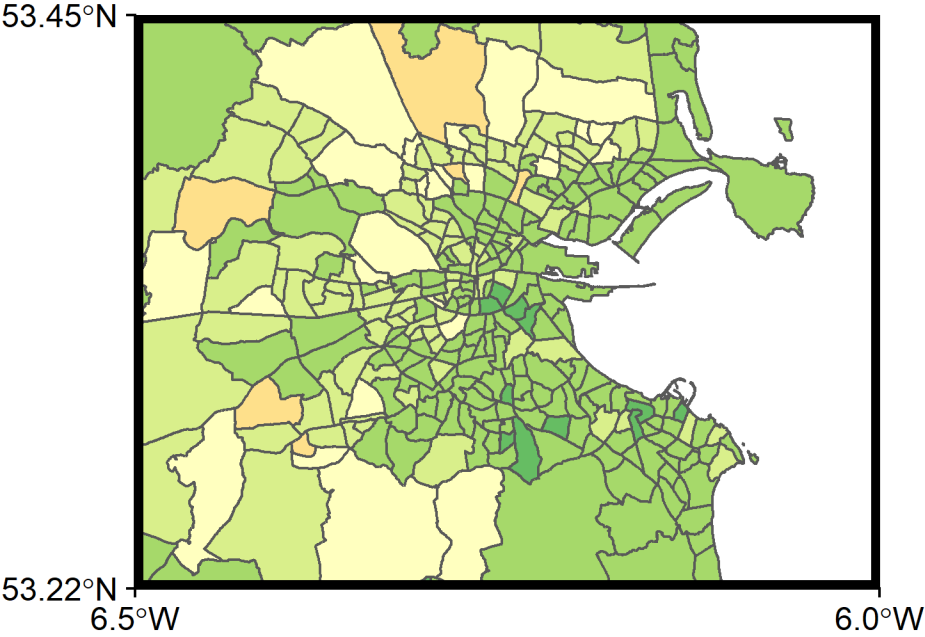

Supplement: Supplementary file 1 [file ijerph-18-06285-s001.zip › SM4_RR_per_week_inset_05_Mar_2021.pdf]
