# Supplementary material for: Population Mobility Trends, Deprivation Index and the Spatio-Temporal Spread of Coronavirus Disease 2019 in Ireland
Source: Int J Environ Res Public Health. 2021 Jun 10;18(12):6285. doi: 10.3390/ijerph18126285 (PMC8296107; doi:10.3390/ijerph18126285)
Supplement: Supplementary file 1 [file ijerph-18-06285-s001.zip]

Archive with 4 entries (4 files):
- SM1_standardise_per_week_inset_04_Mar_2021.pdf
- SM2_county_shi_age_all_counties23_Feb_2021.pdf
- SM3_county_CM_age_all_counties08_Mar_2021.pdf
- SM4_RR_per_week_inset_05_Mar_2021.pdf
