# Supplementary material for: Population Mobility Trends, Deprivation Index and the Spatio-Temporal Spread of Coronavirus Disease 2019 in Ireland
Source: Int J Environ Res Public Health. 2021 Jun 10;18(12):6285. doi: 10.3390/ijerph18126285 (PMC8296107; doi:10.3390/ijerph18126285)
Supplement: Supplementary file 1 [file ijerph-18-06285-s001.zip › SM2_county_shi_age_all_counties23_Feb_2021.pdf]

**Carlow**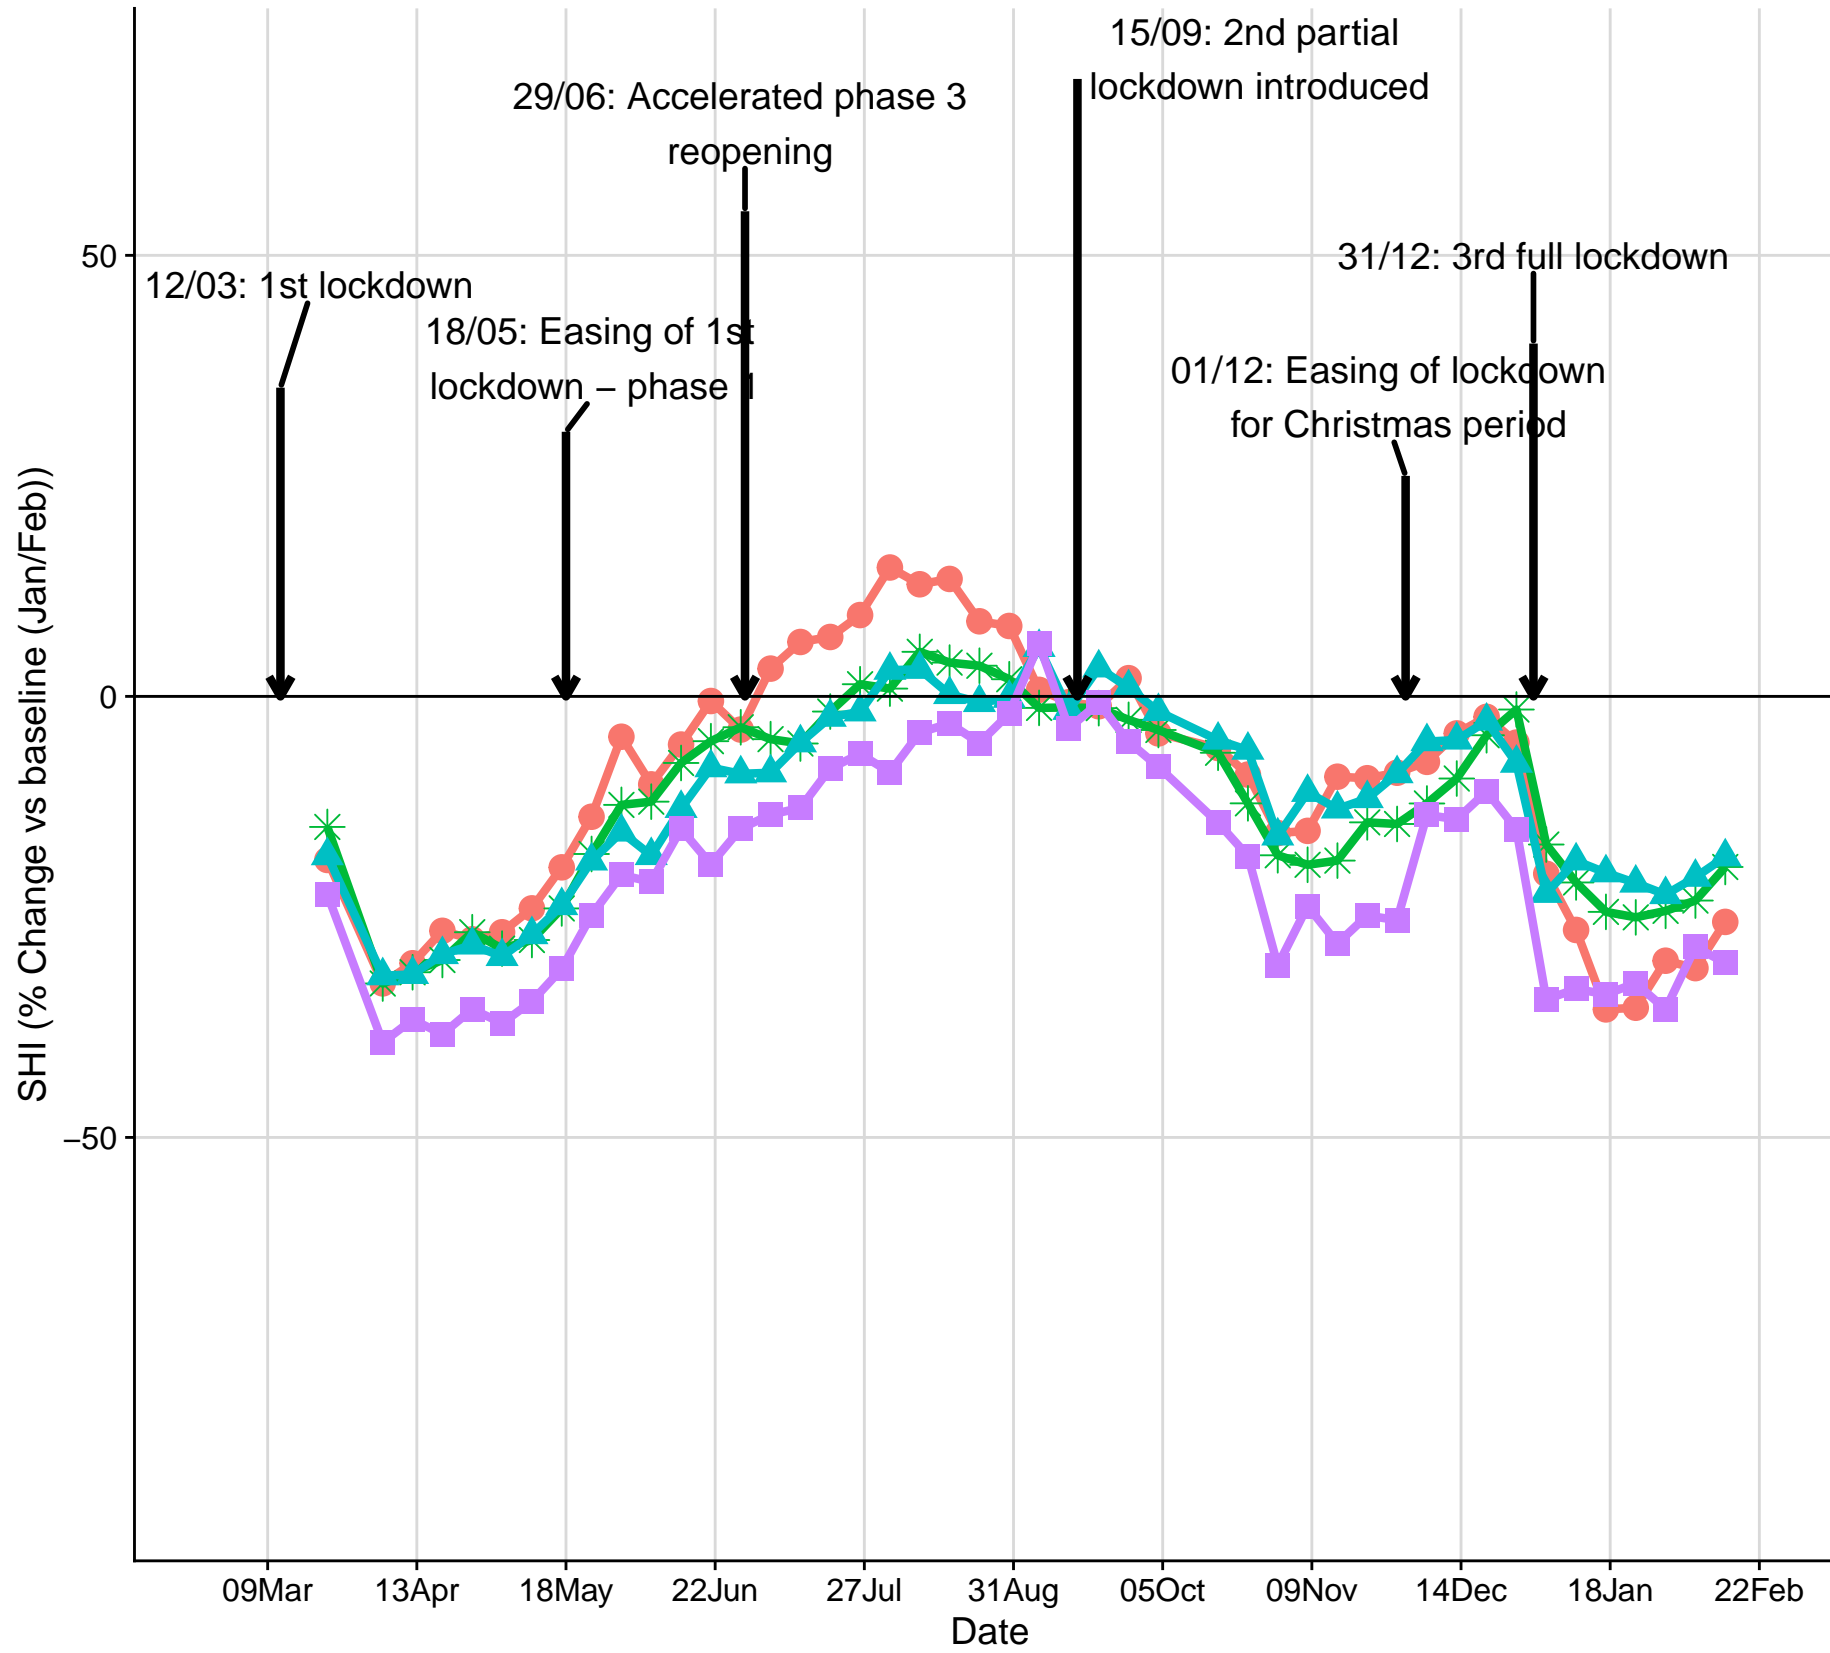**Cavan**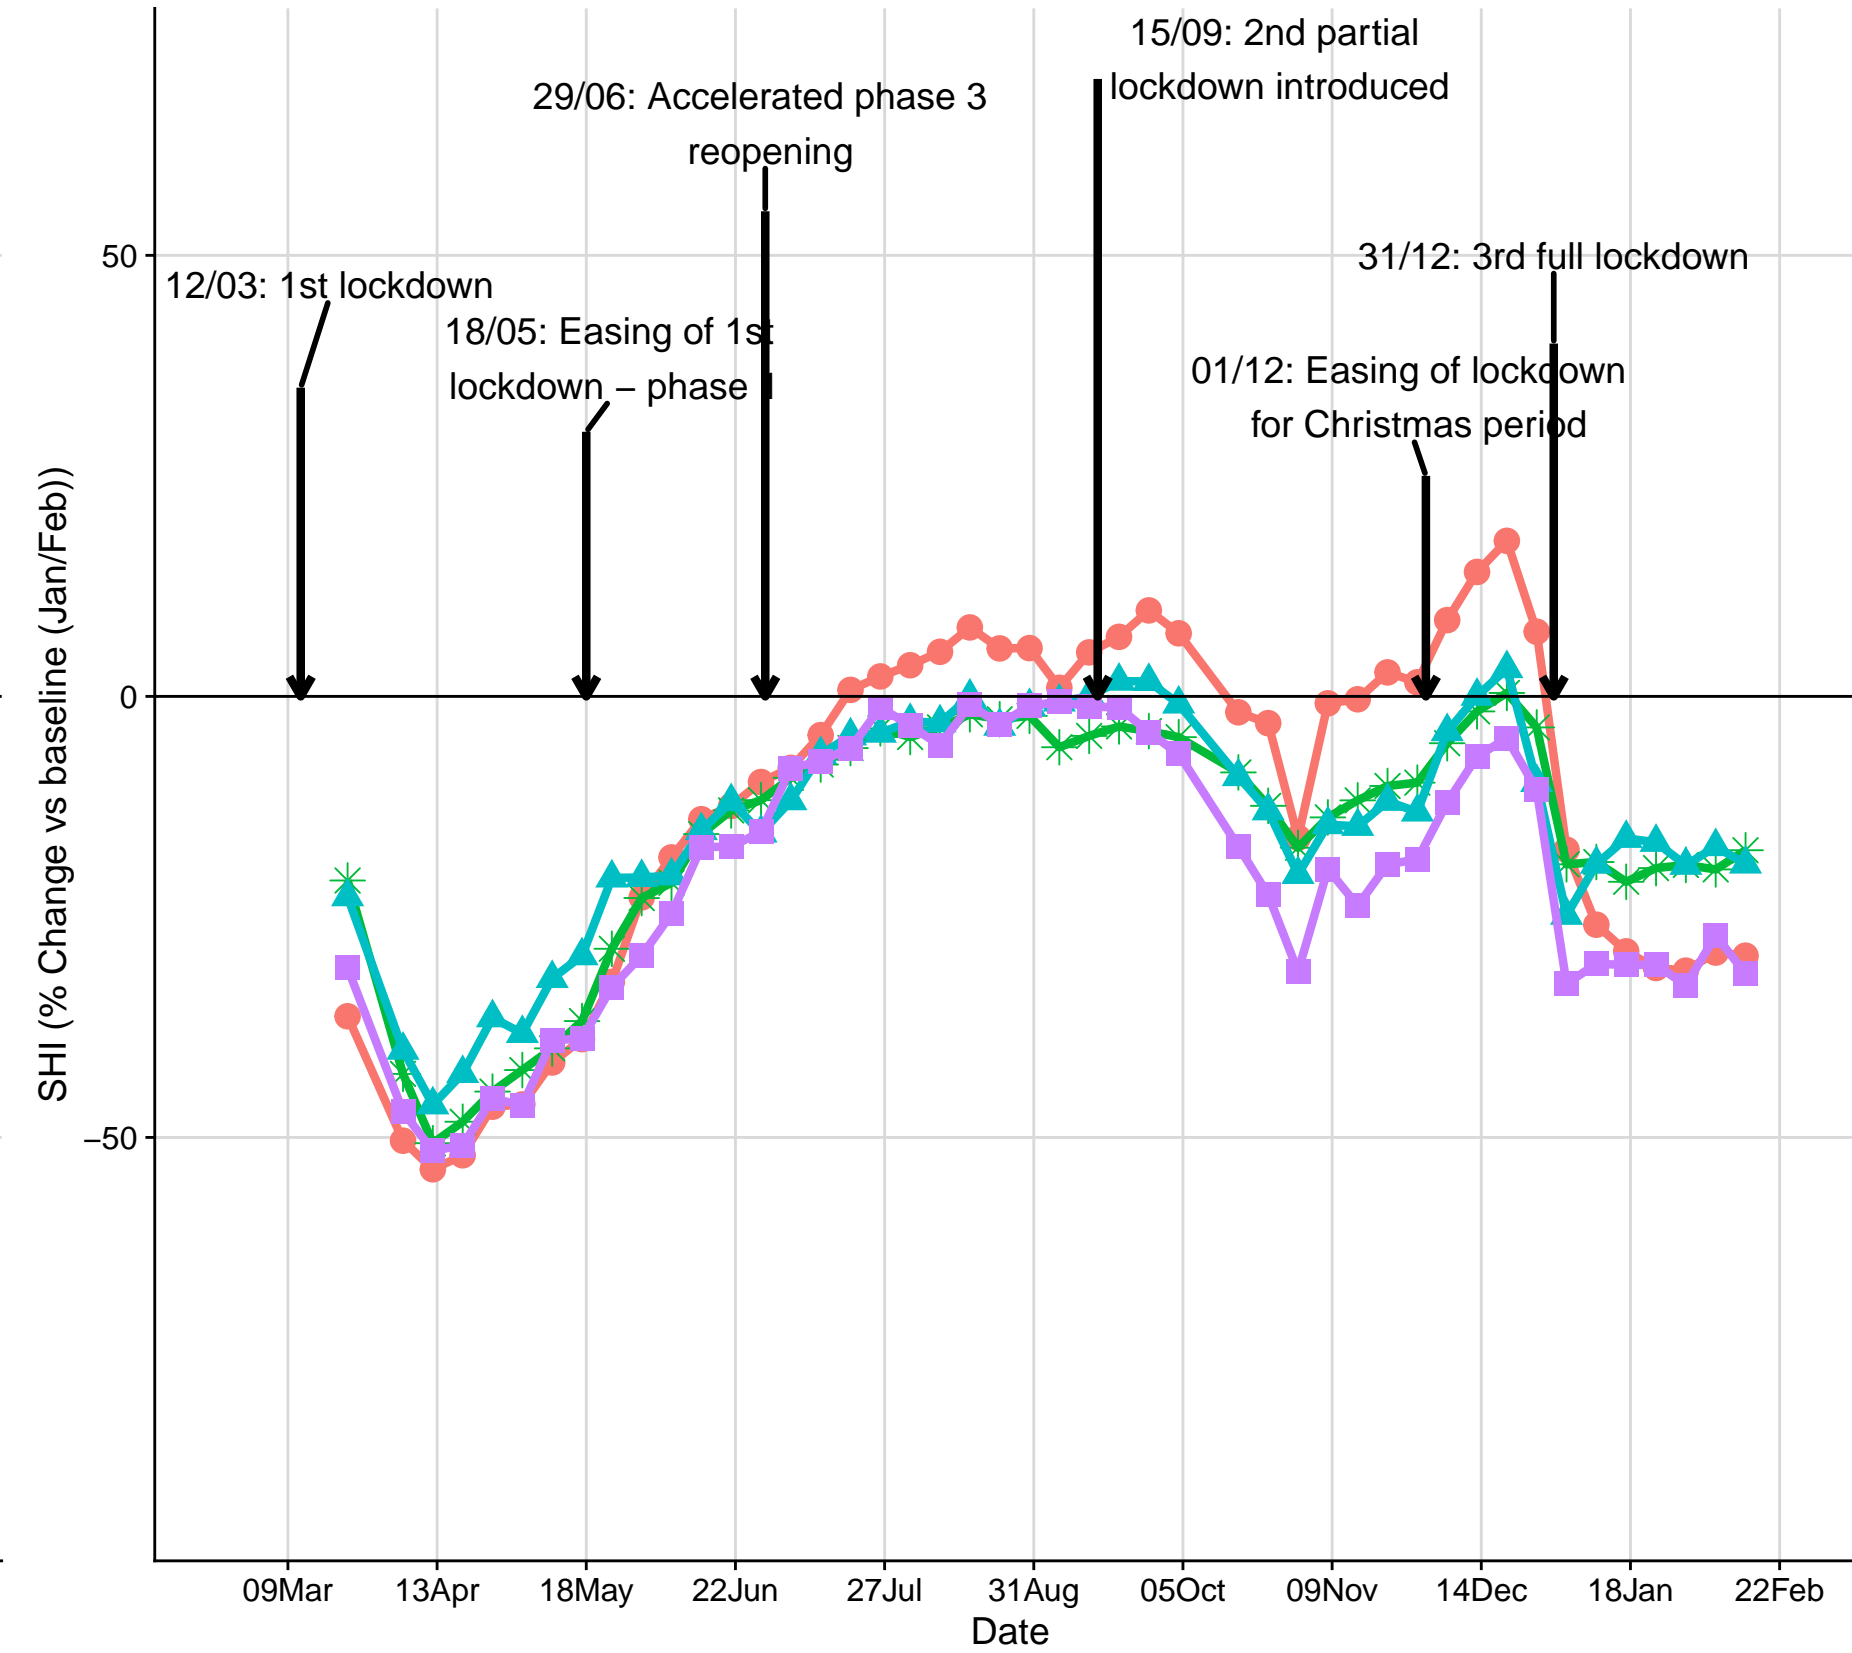

Age Bins ● u20 SHI \* 20–24 SHI ▲ 60–64 SHI ■ o65 SHI

## Clare

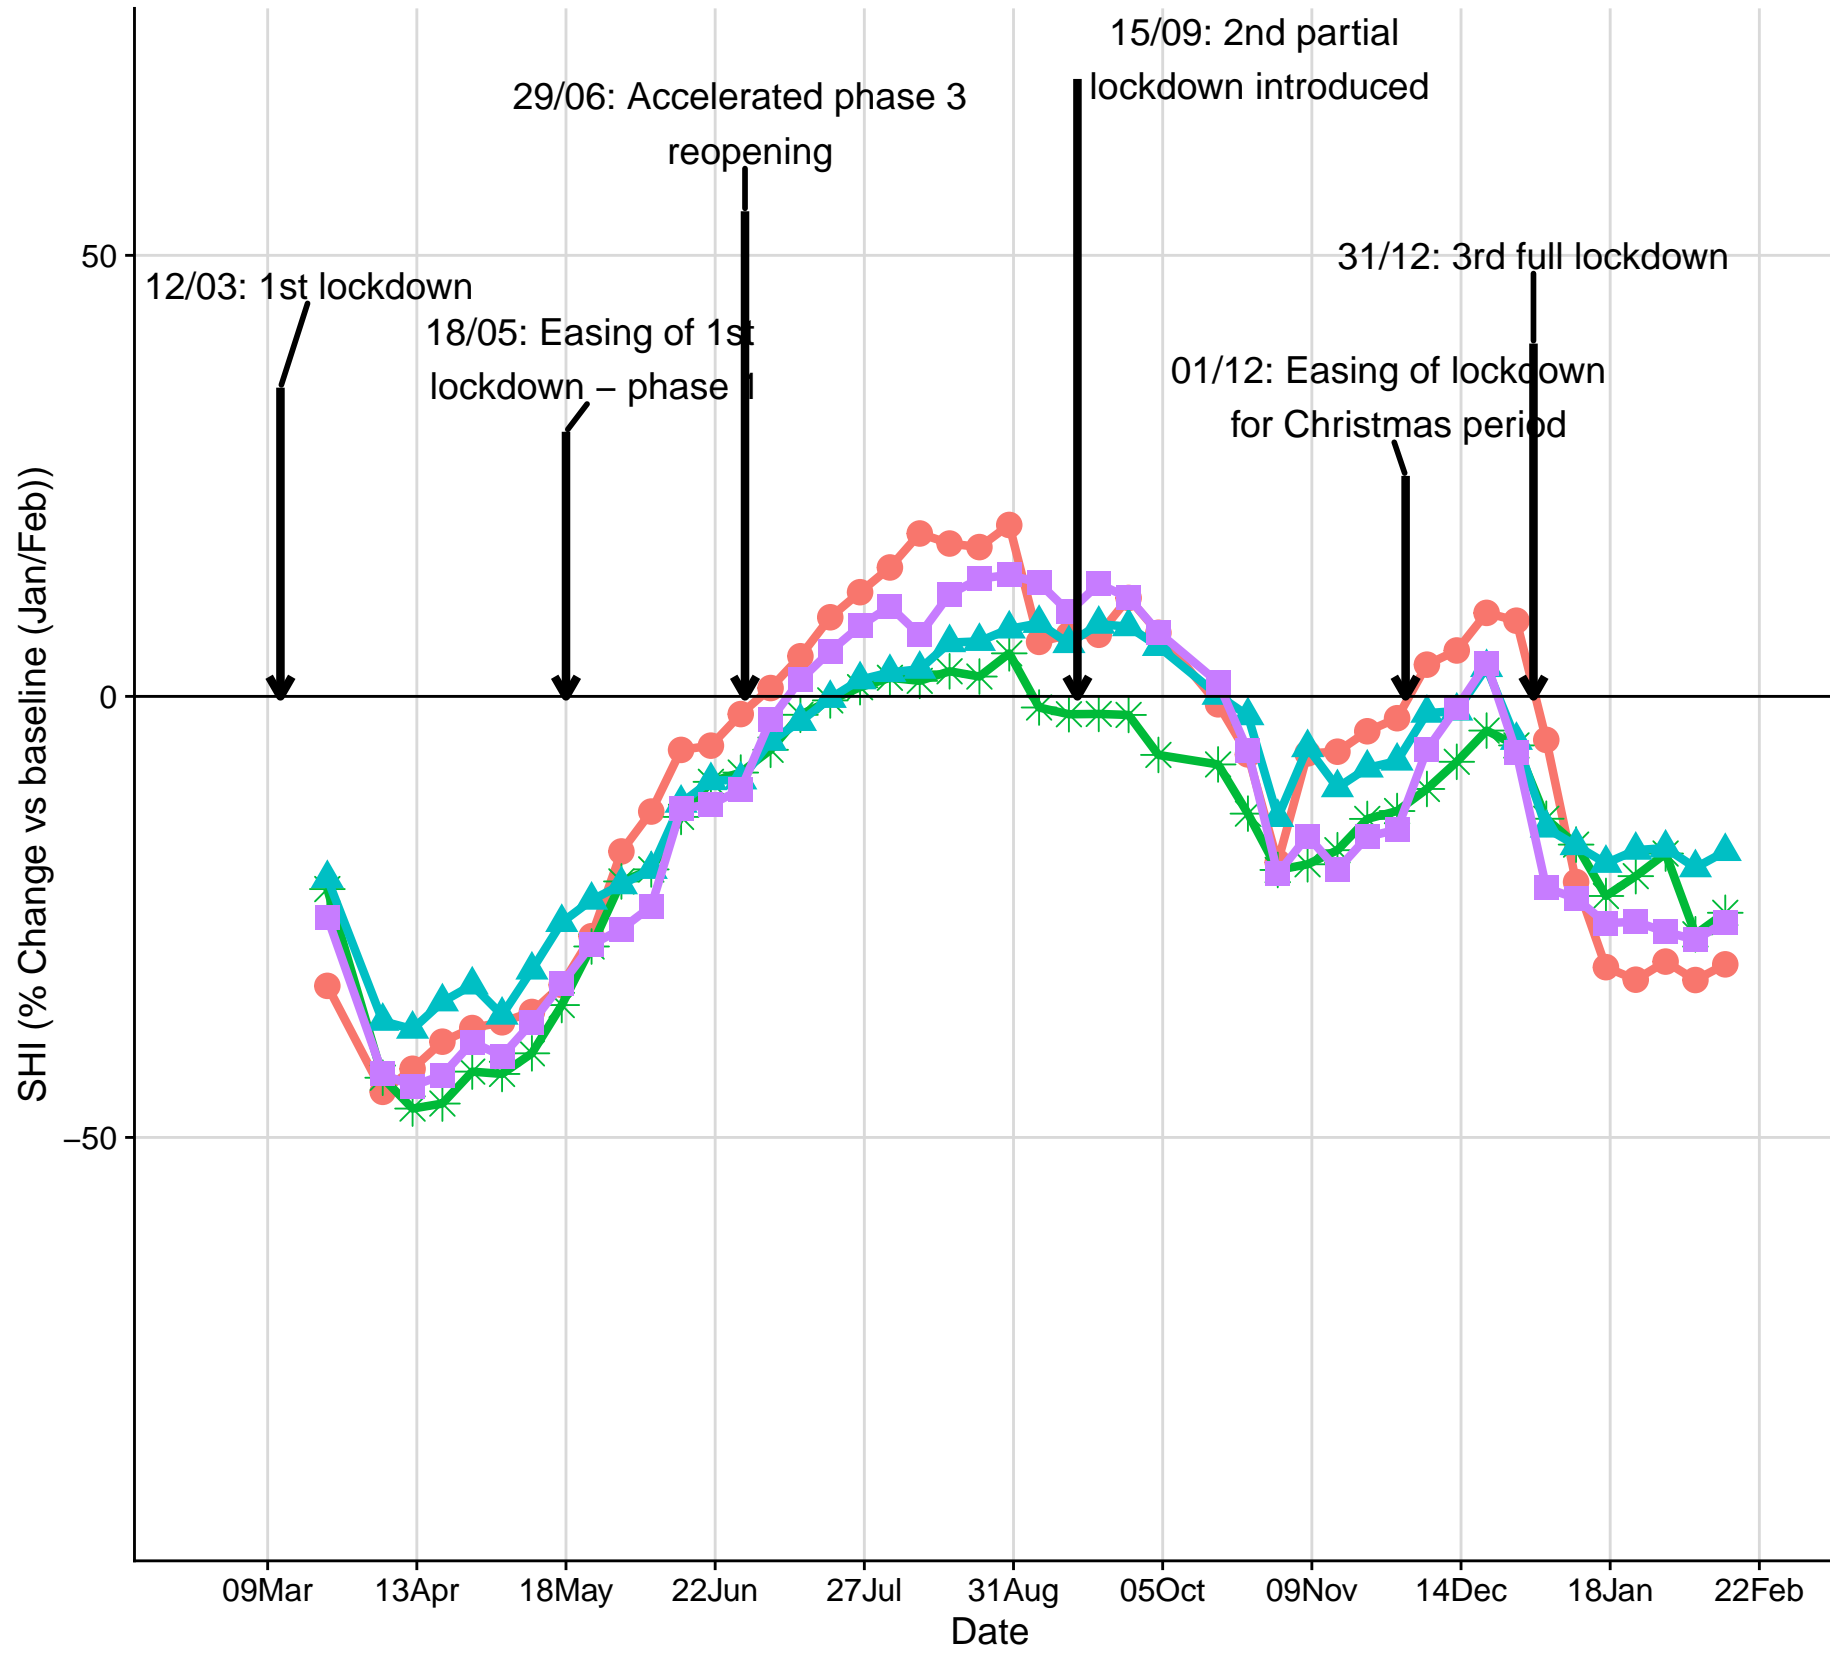

## Cork

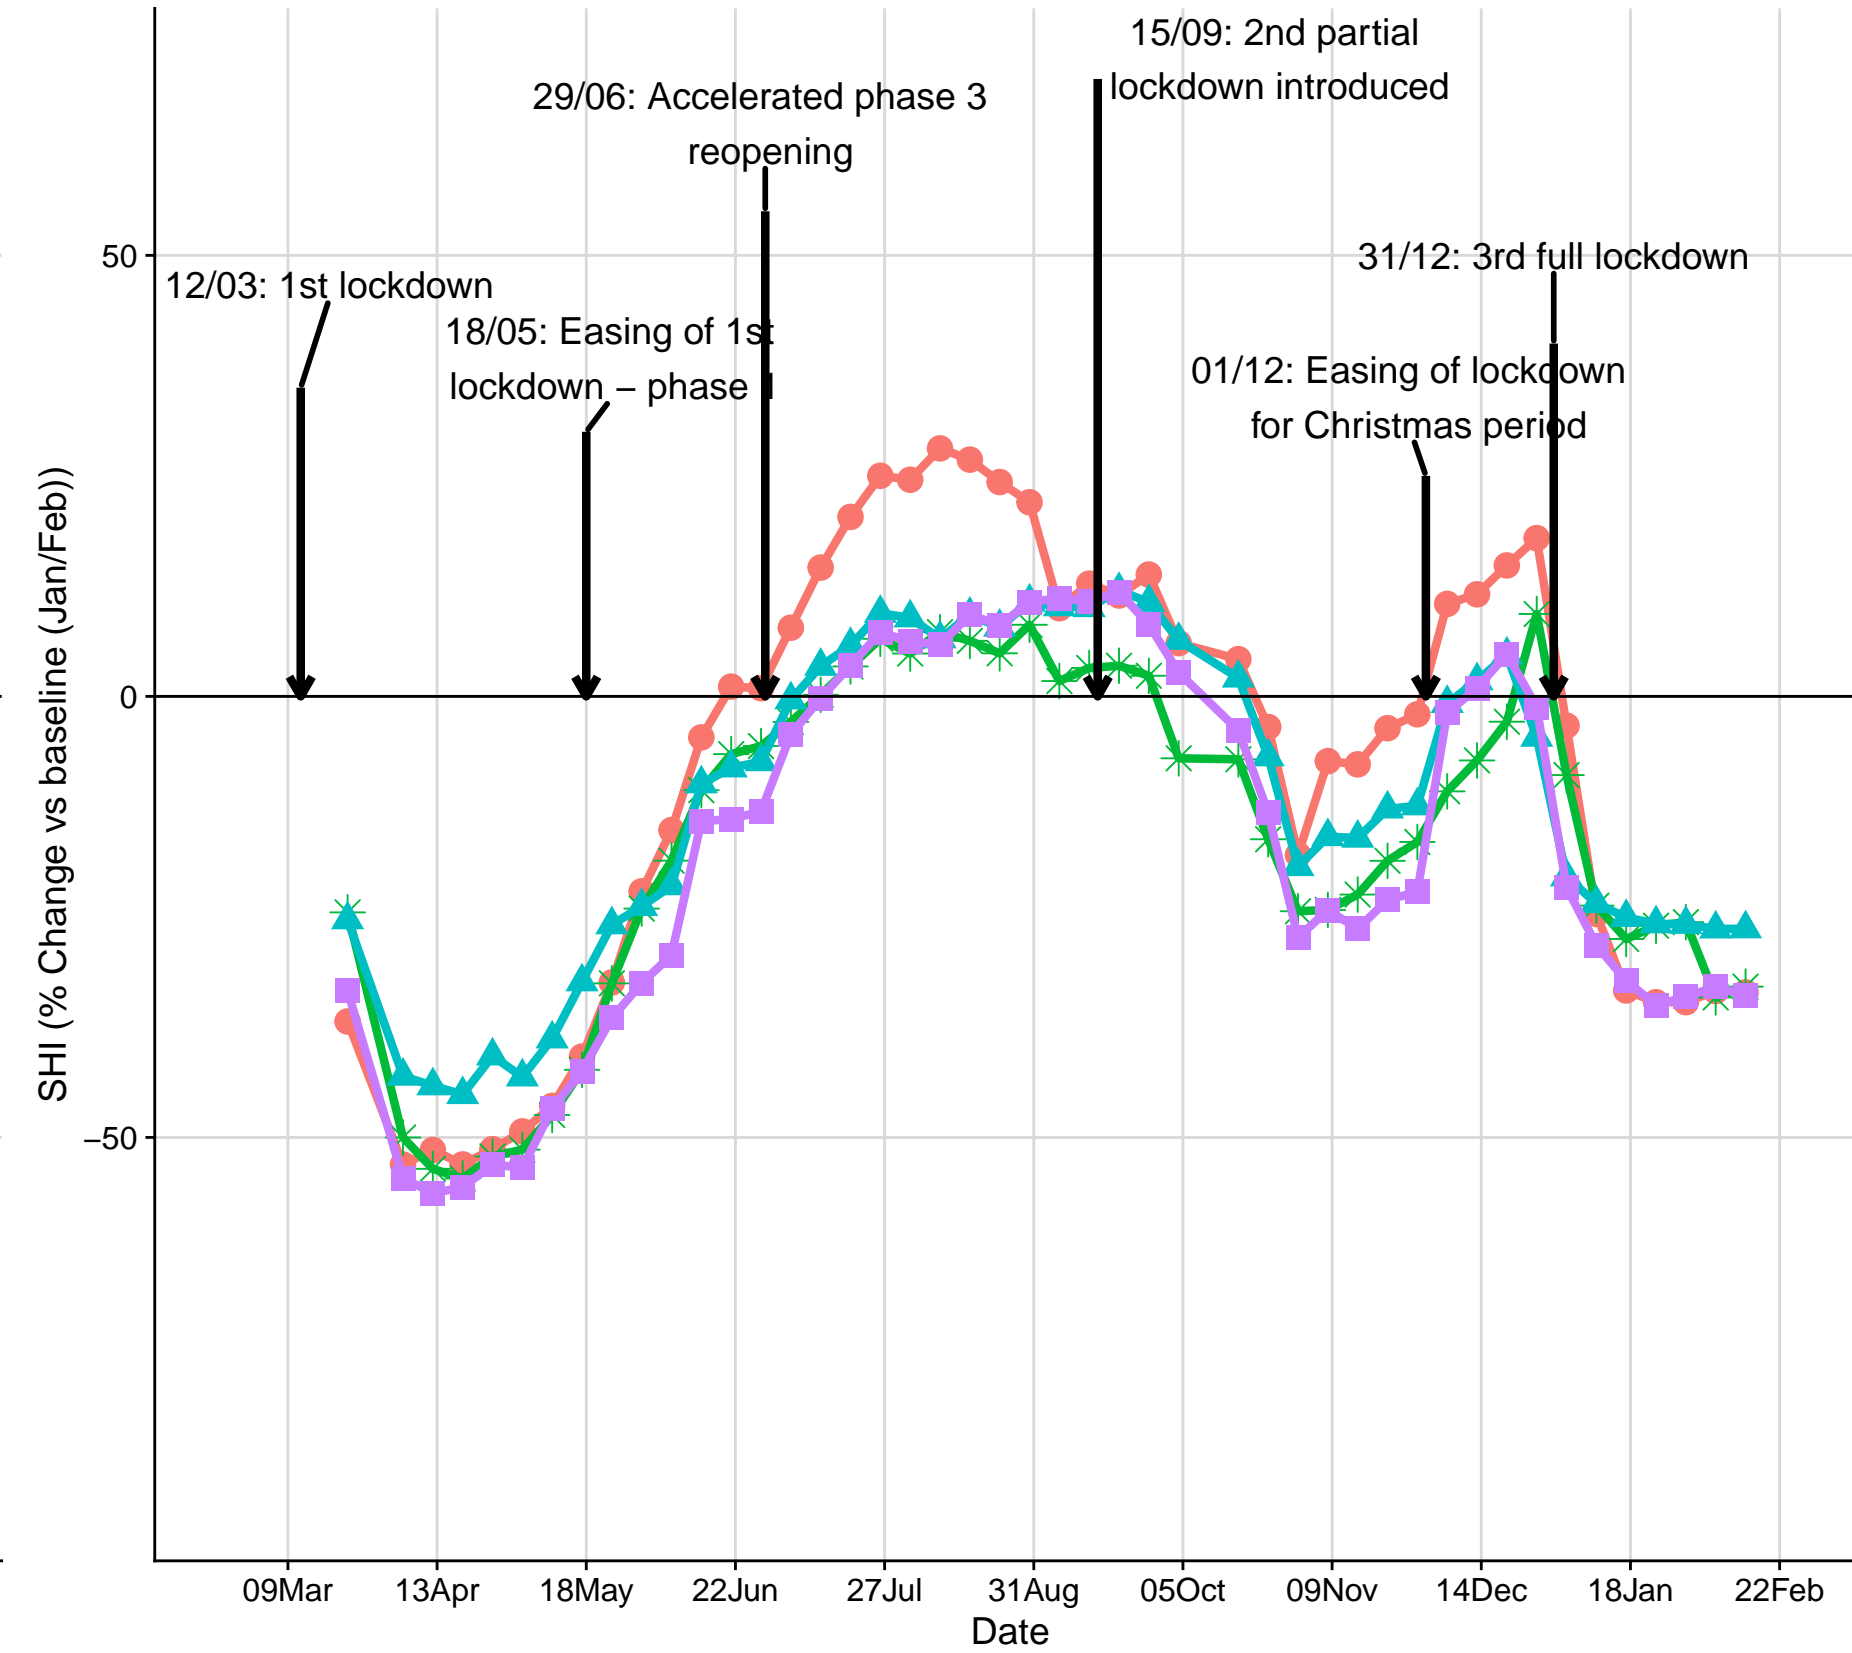

Age Bins u20 SHI 20–24 SHI 60–64 SHI o65 SHI

## Donegal

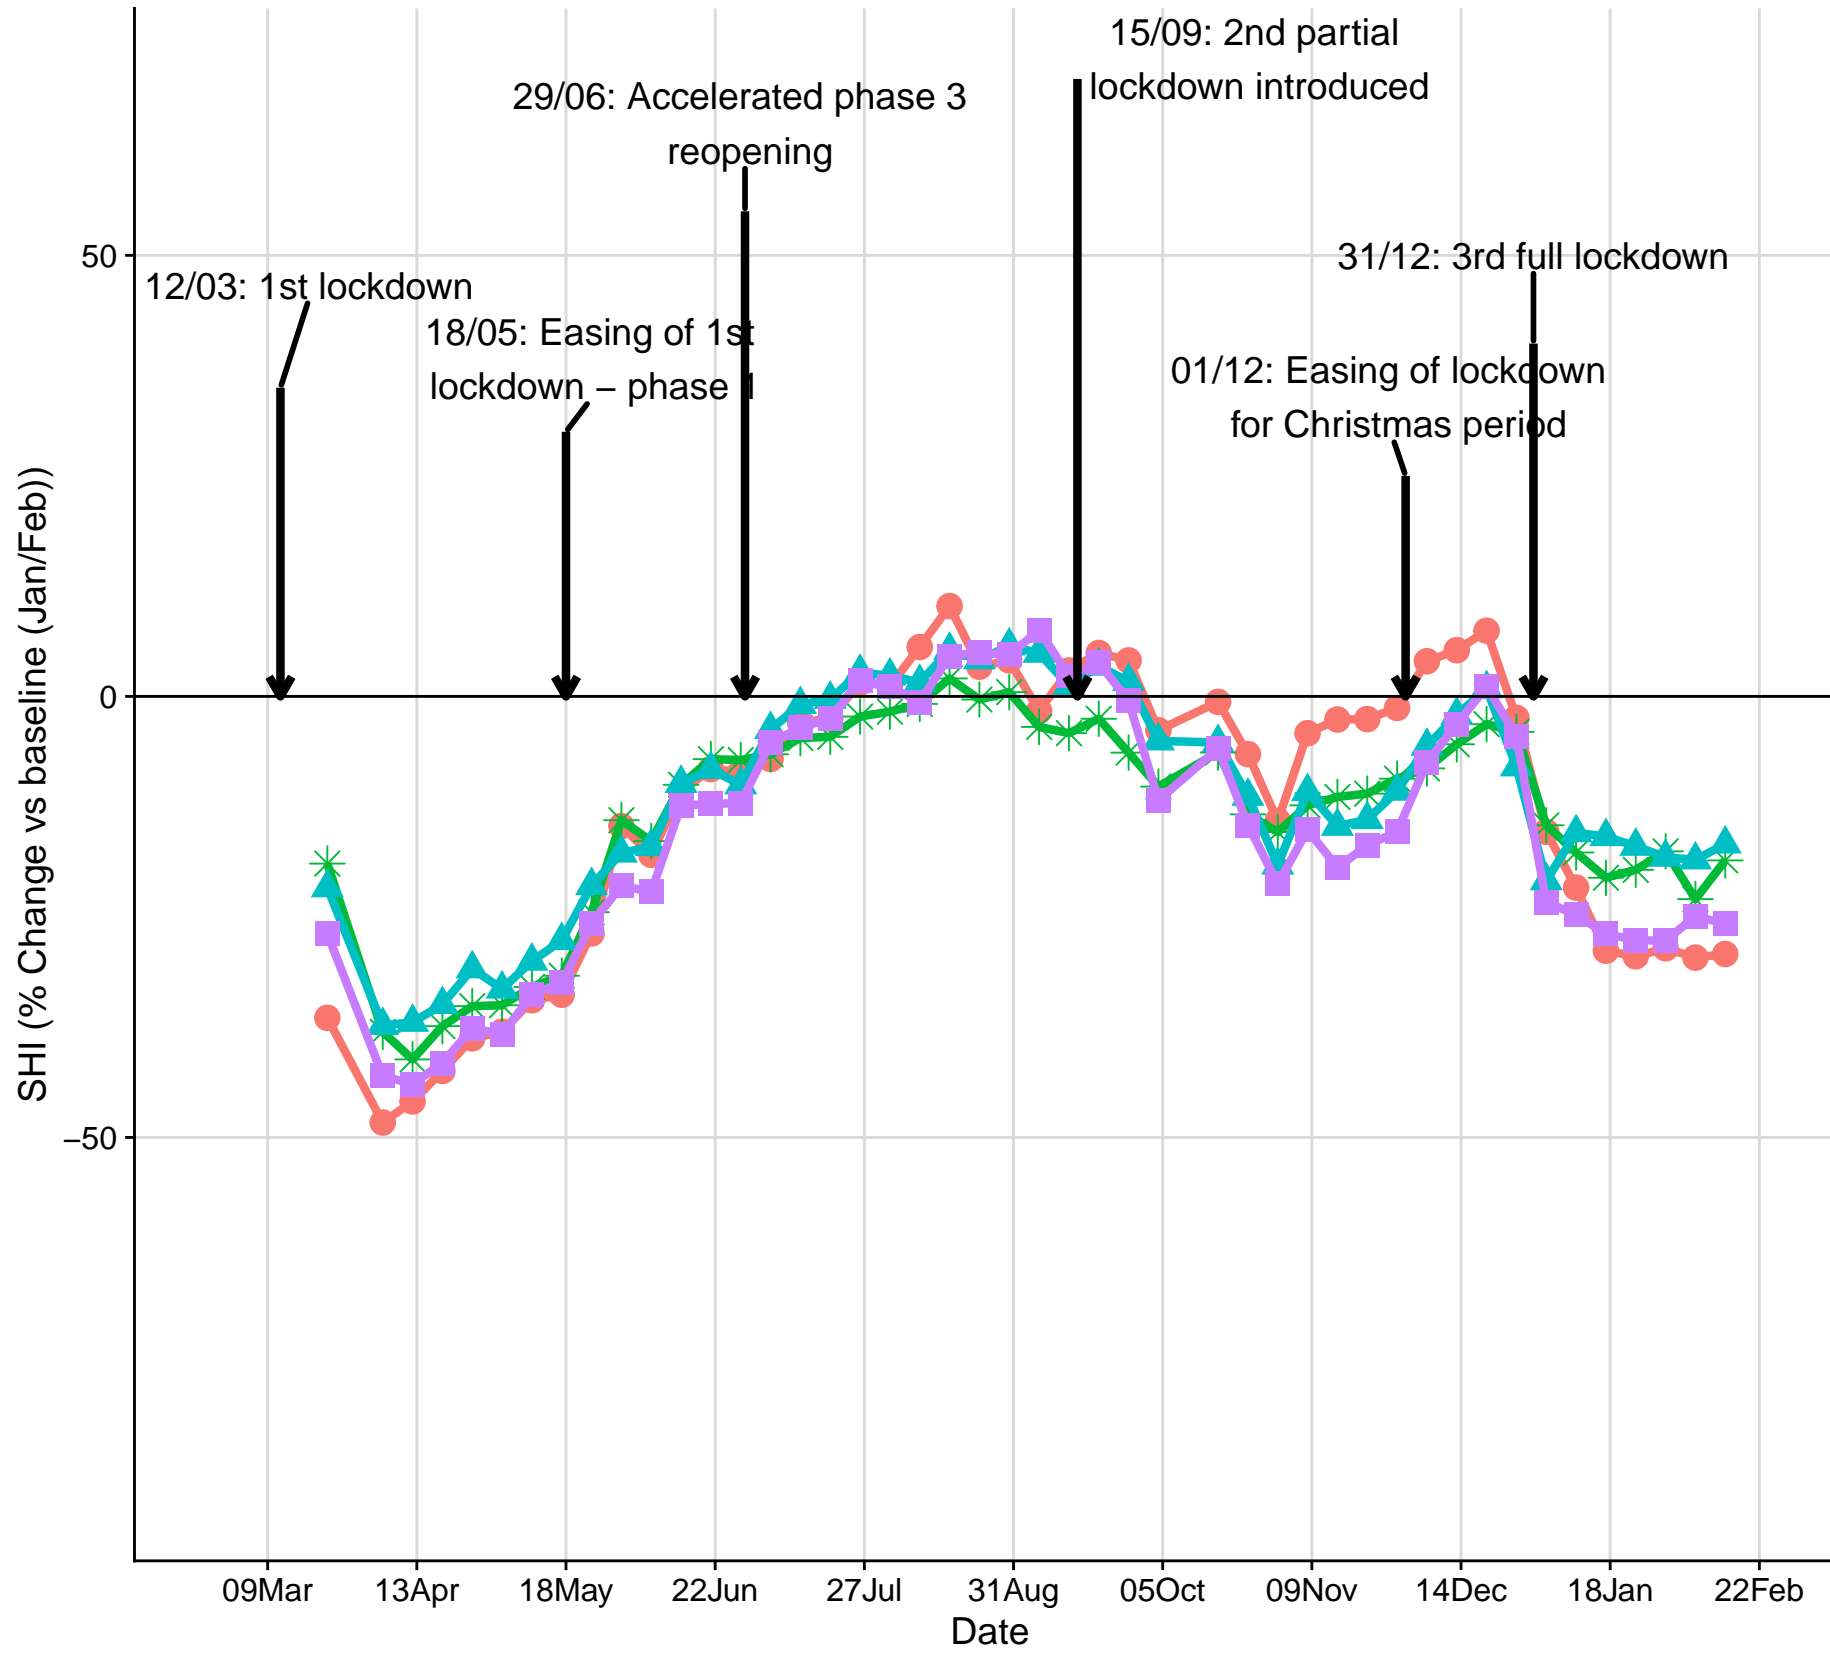

## Dublin

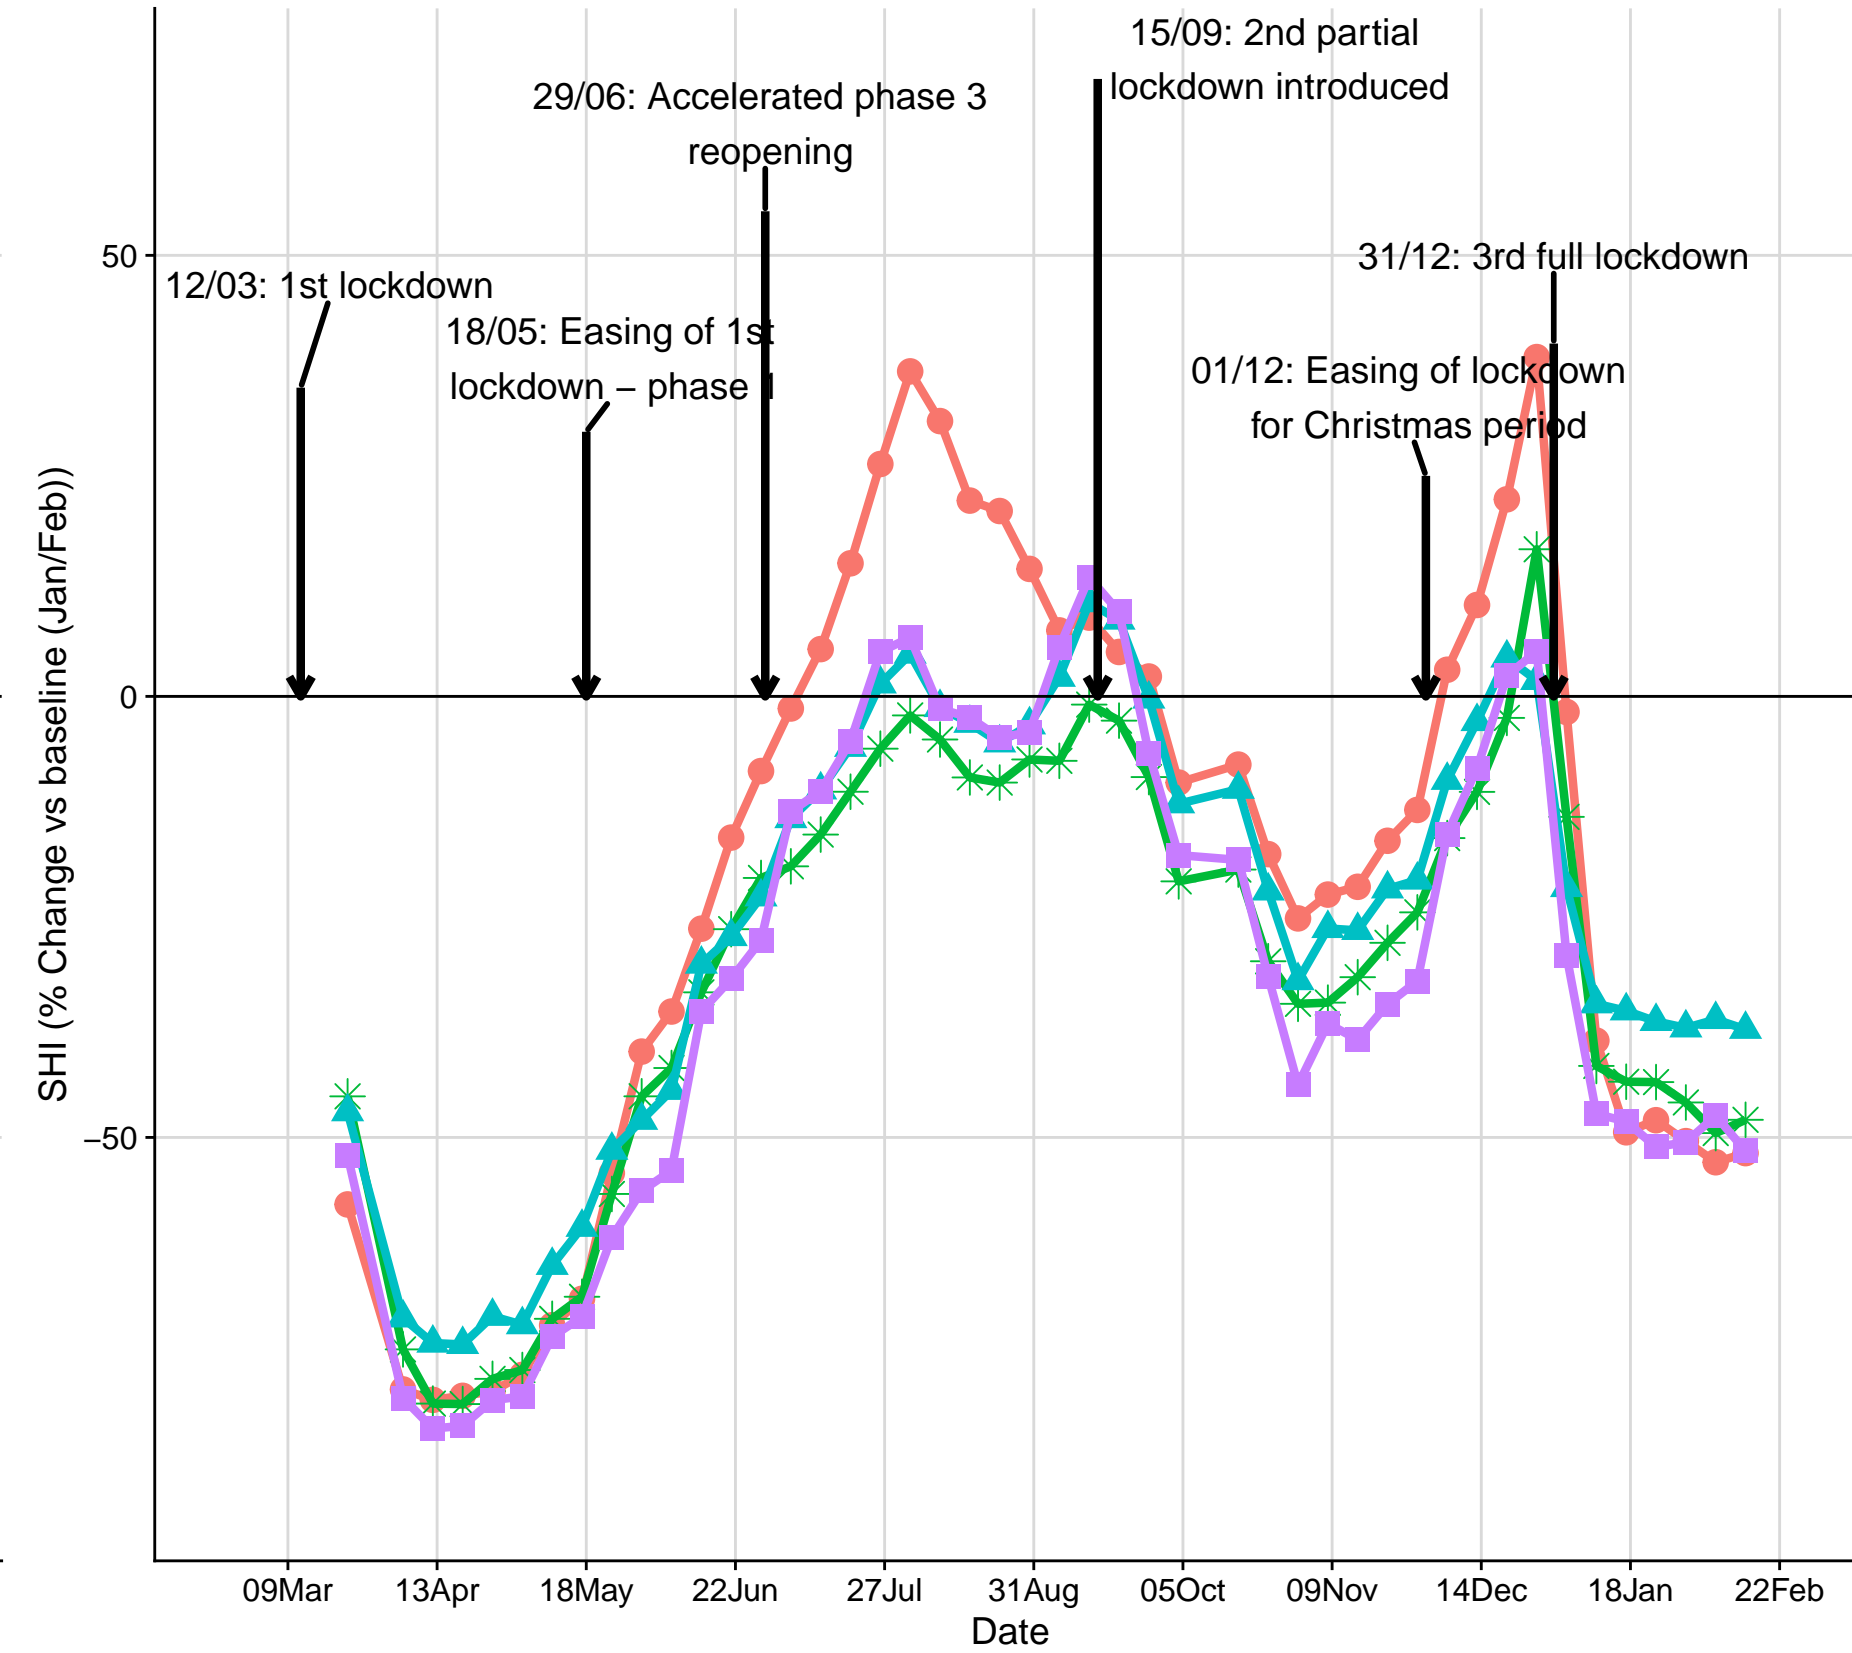

Age Bins u20 SHI 20–24 SHI 60–64 SHI o65 SHI

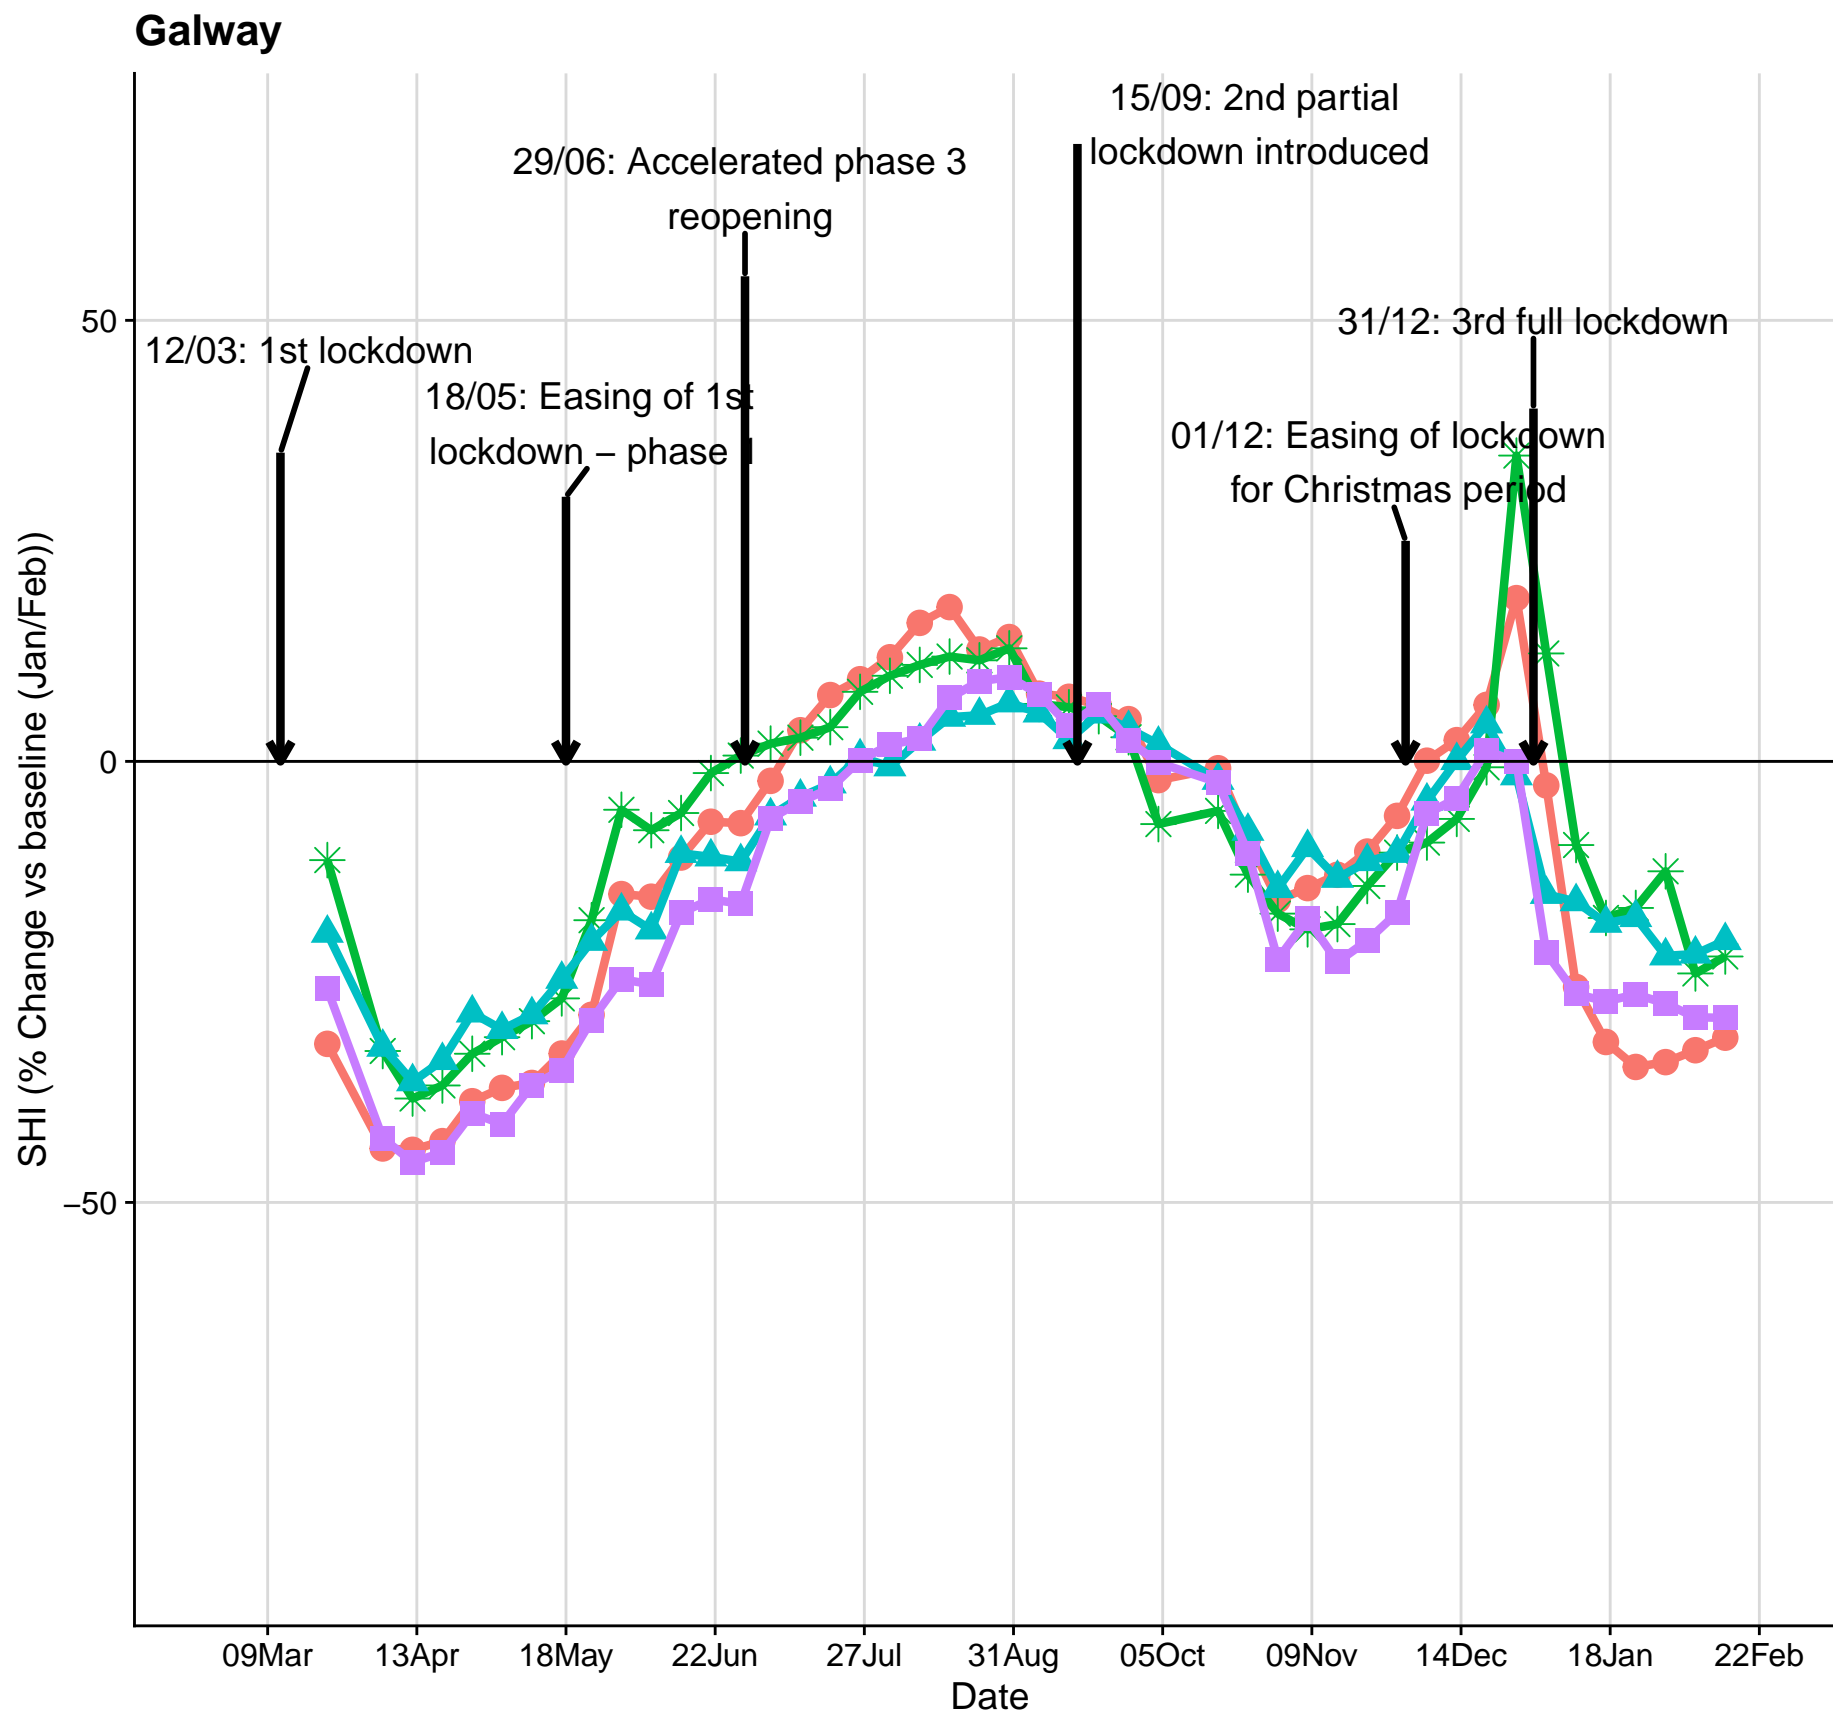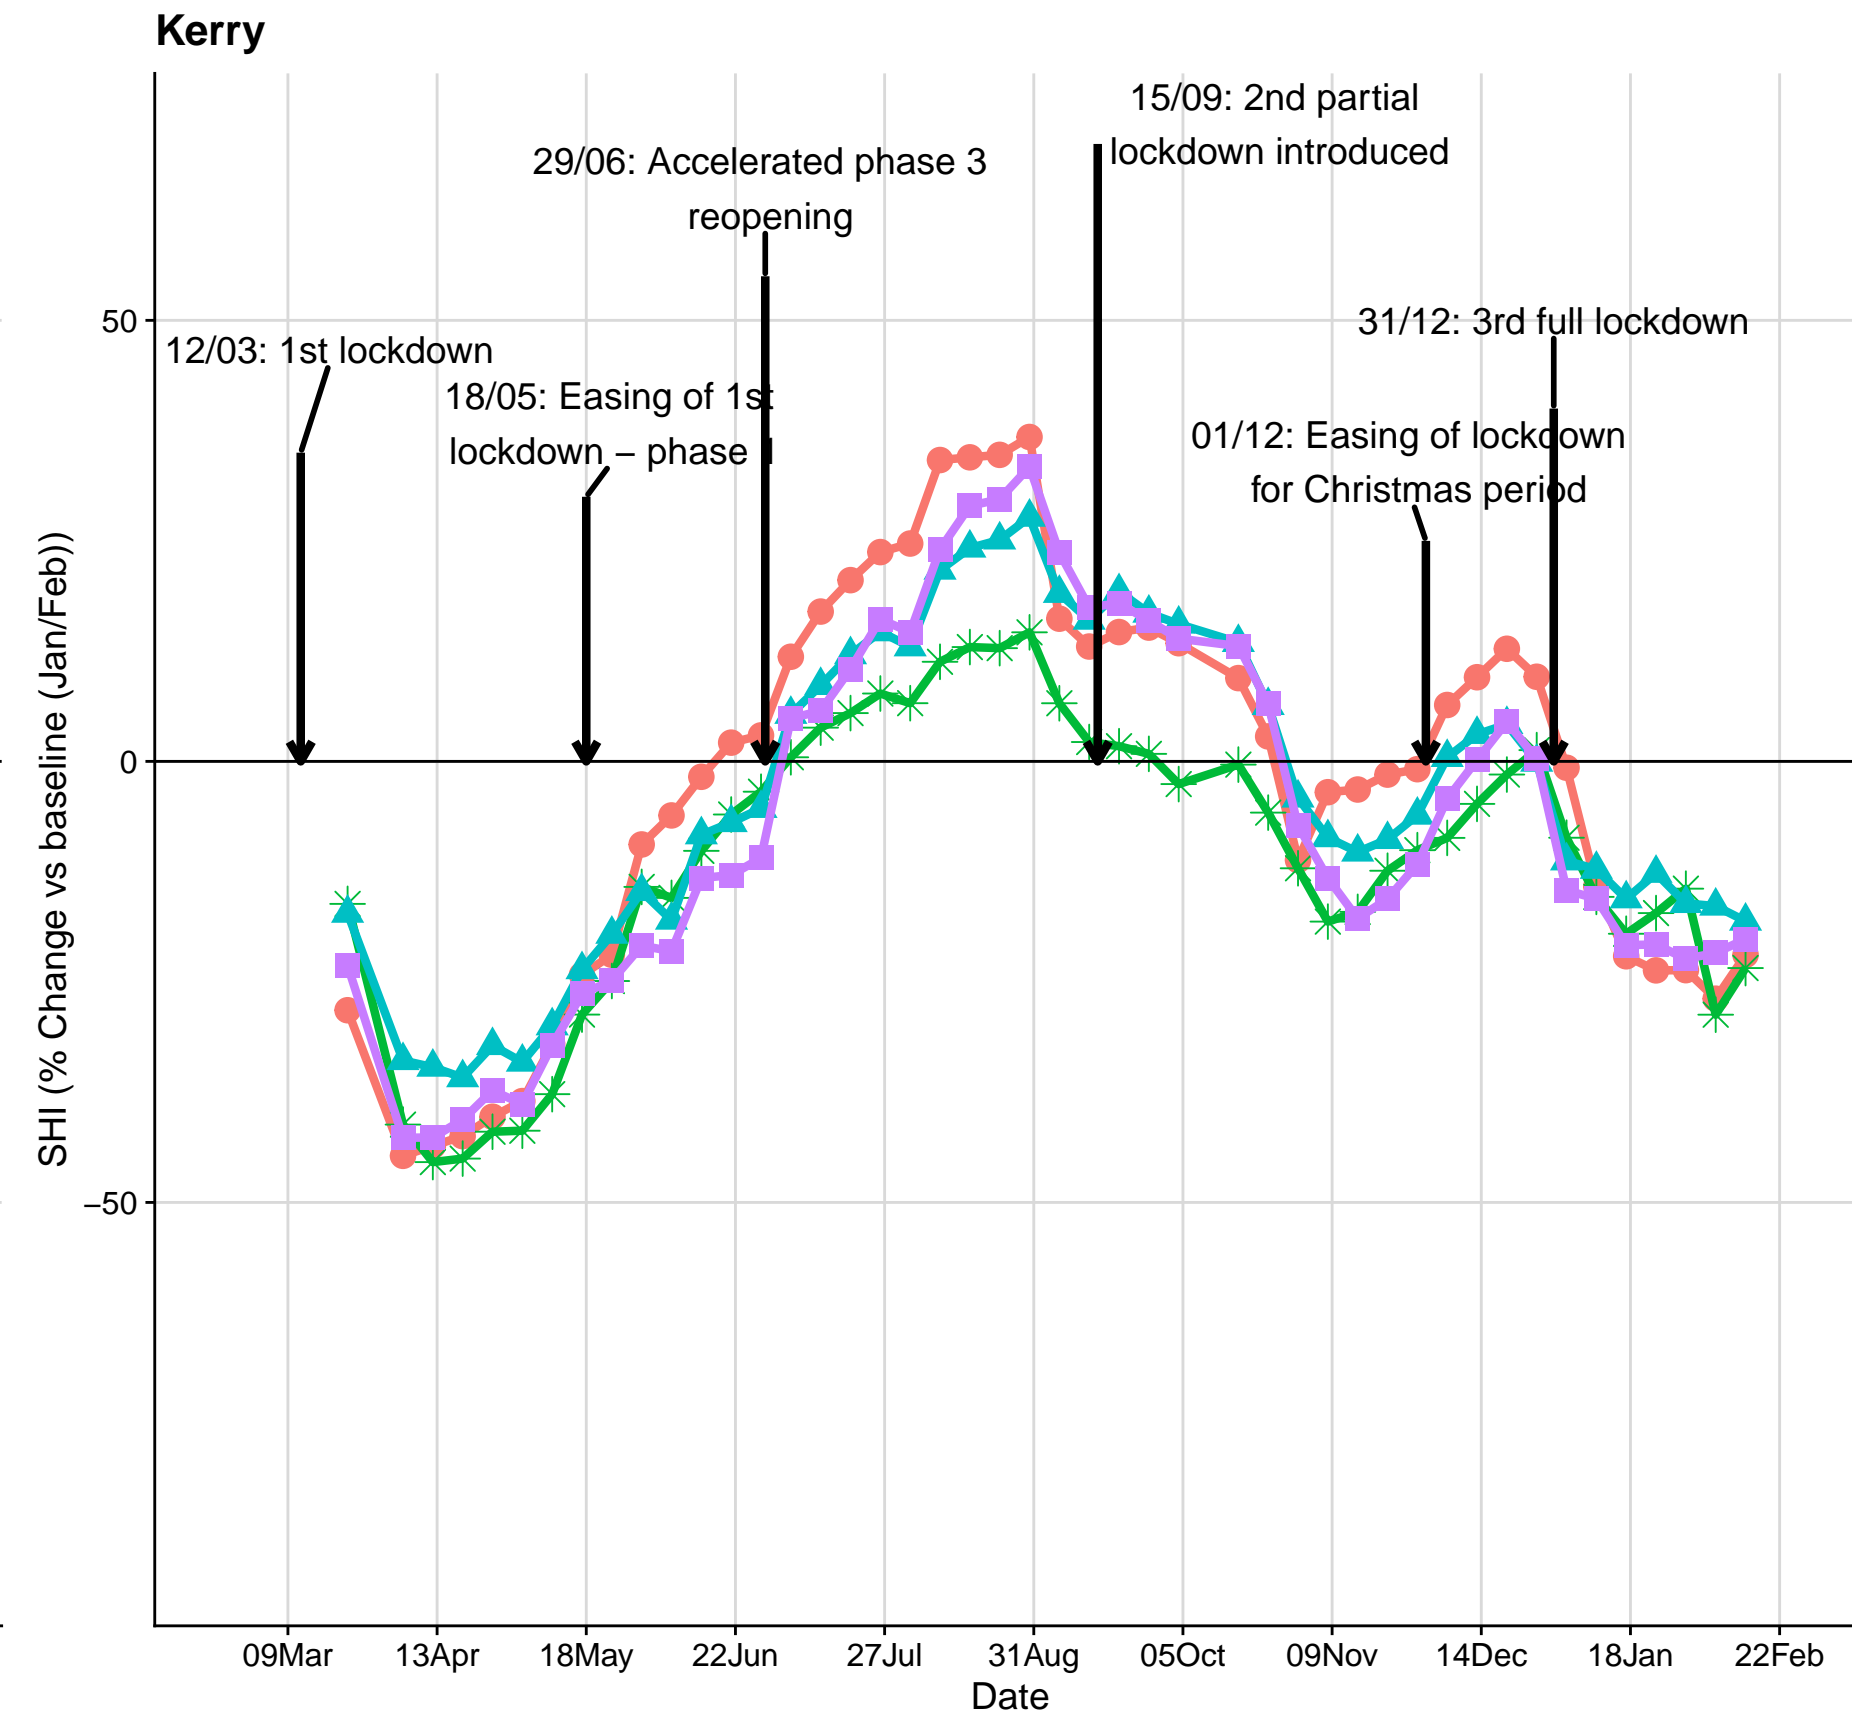

Age Bins ● u20 SHI \* 20–24 SHI ▲ 60–64 SHI ■ o65 SHI

## Kildare

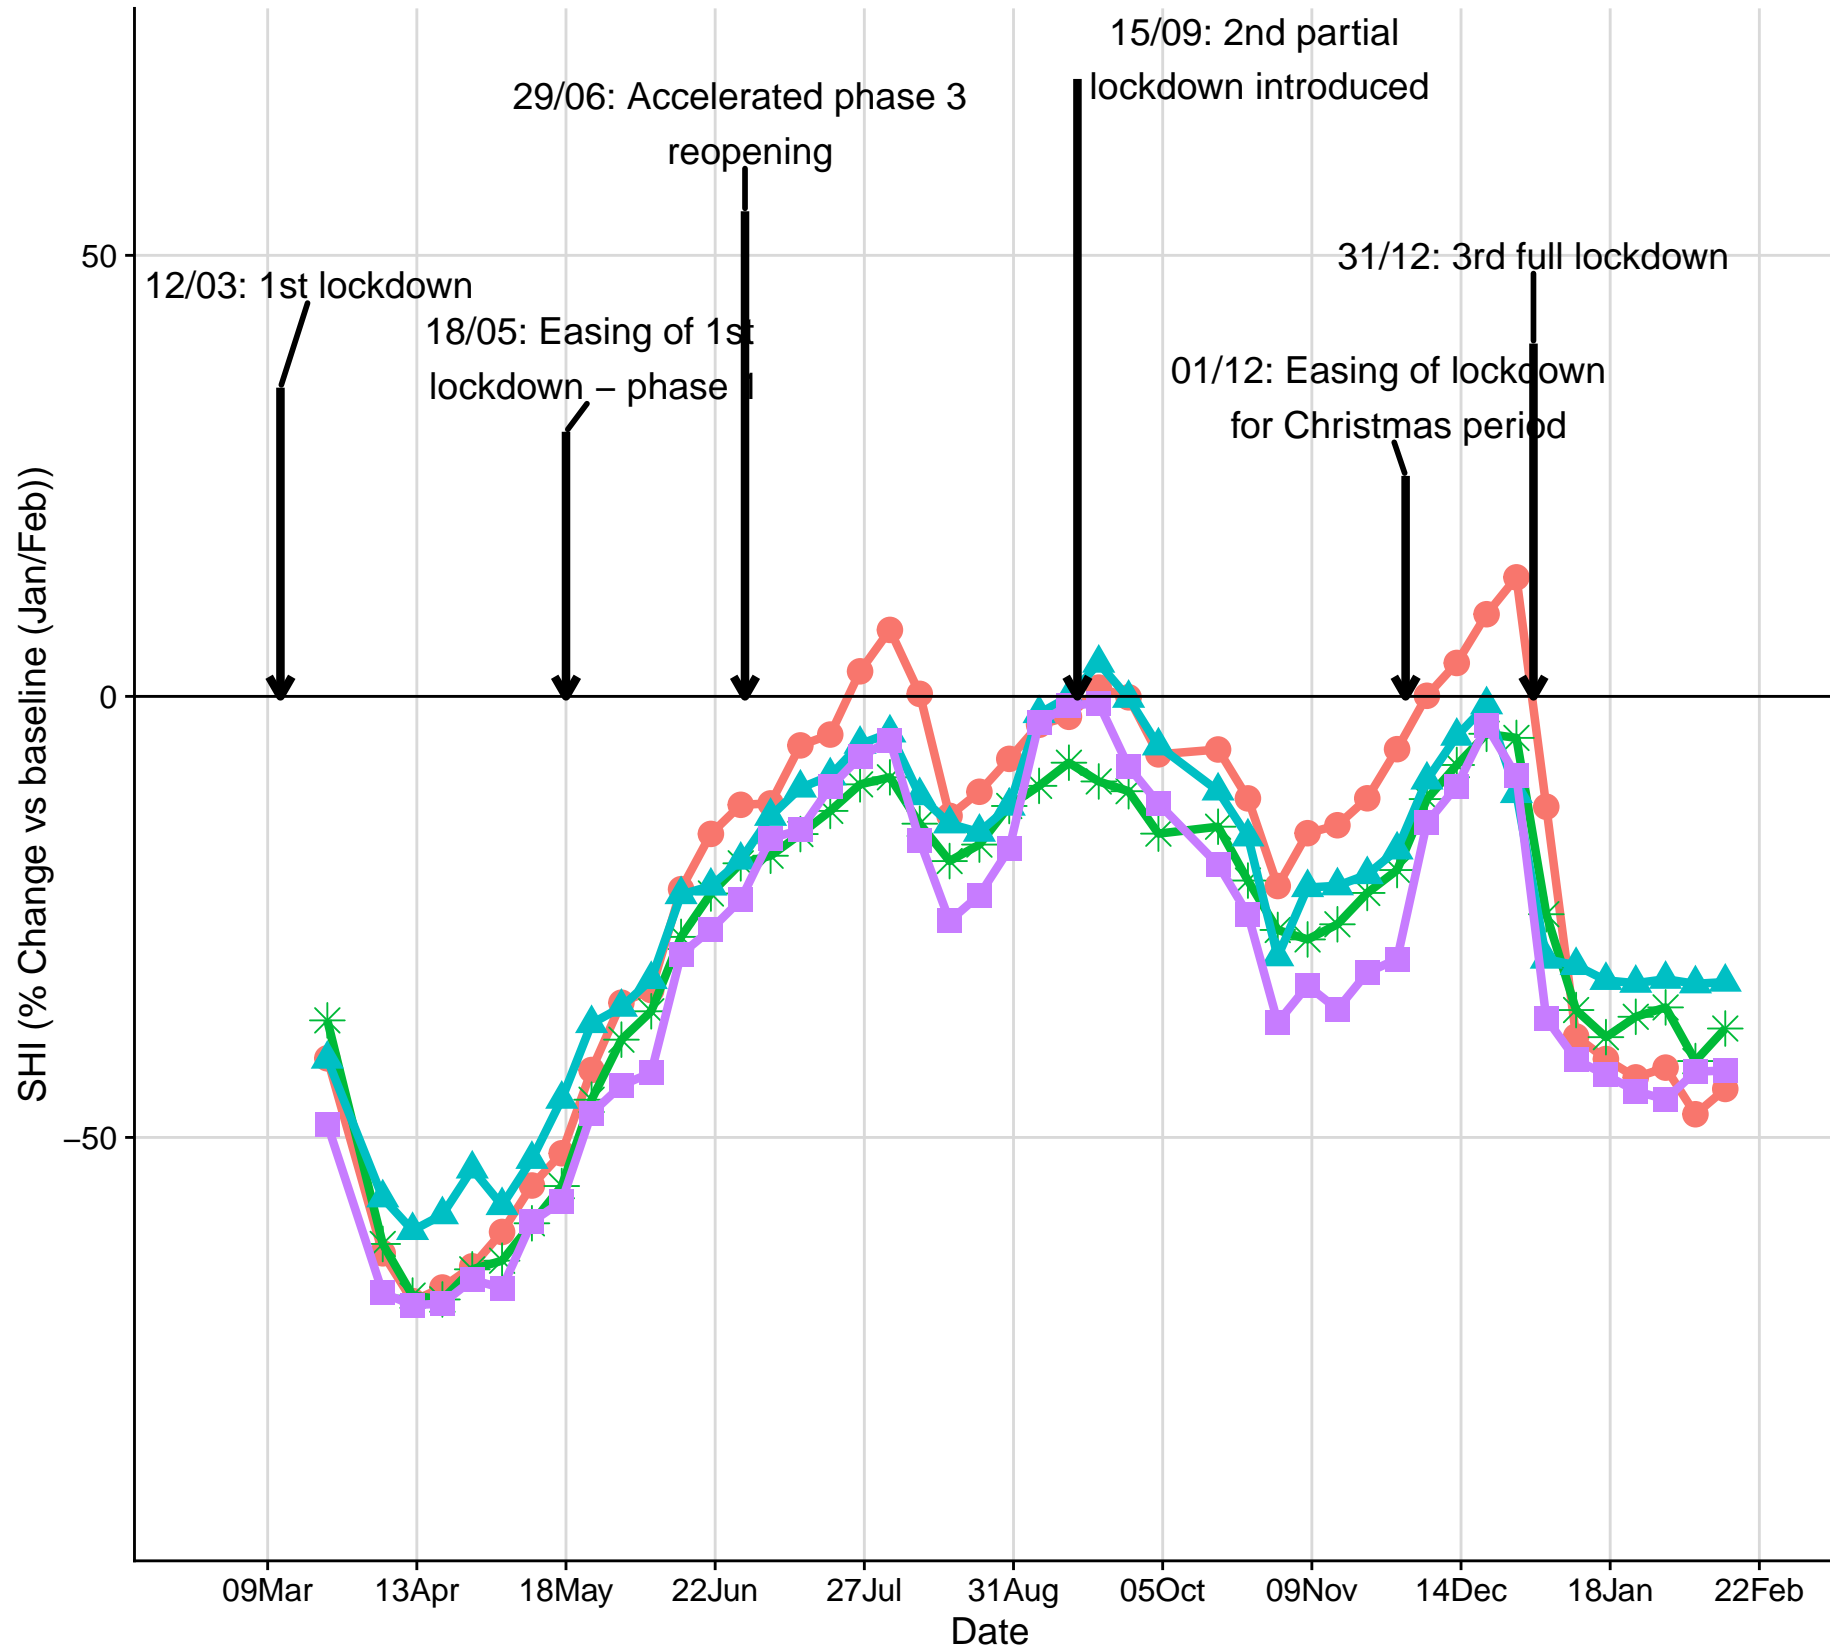

## Kilkenny

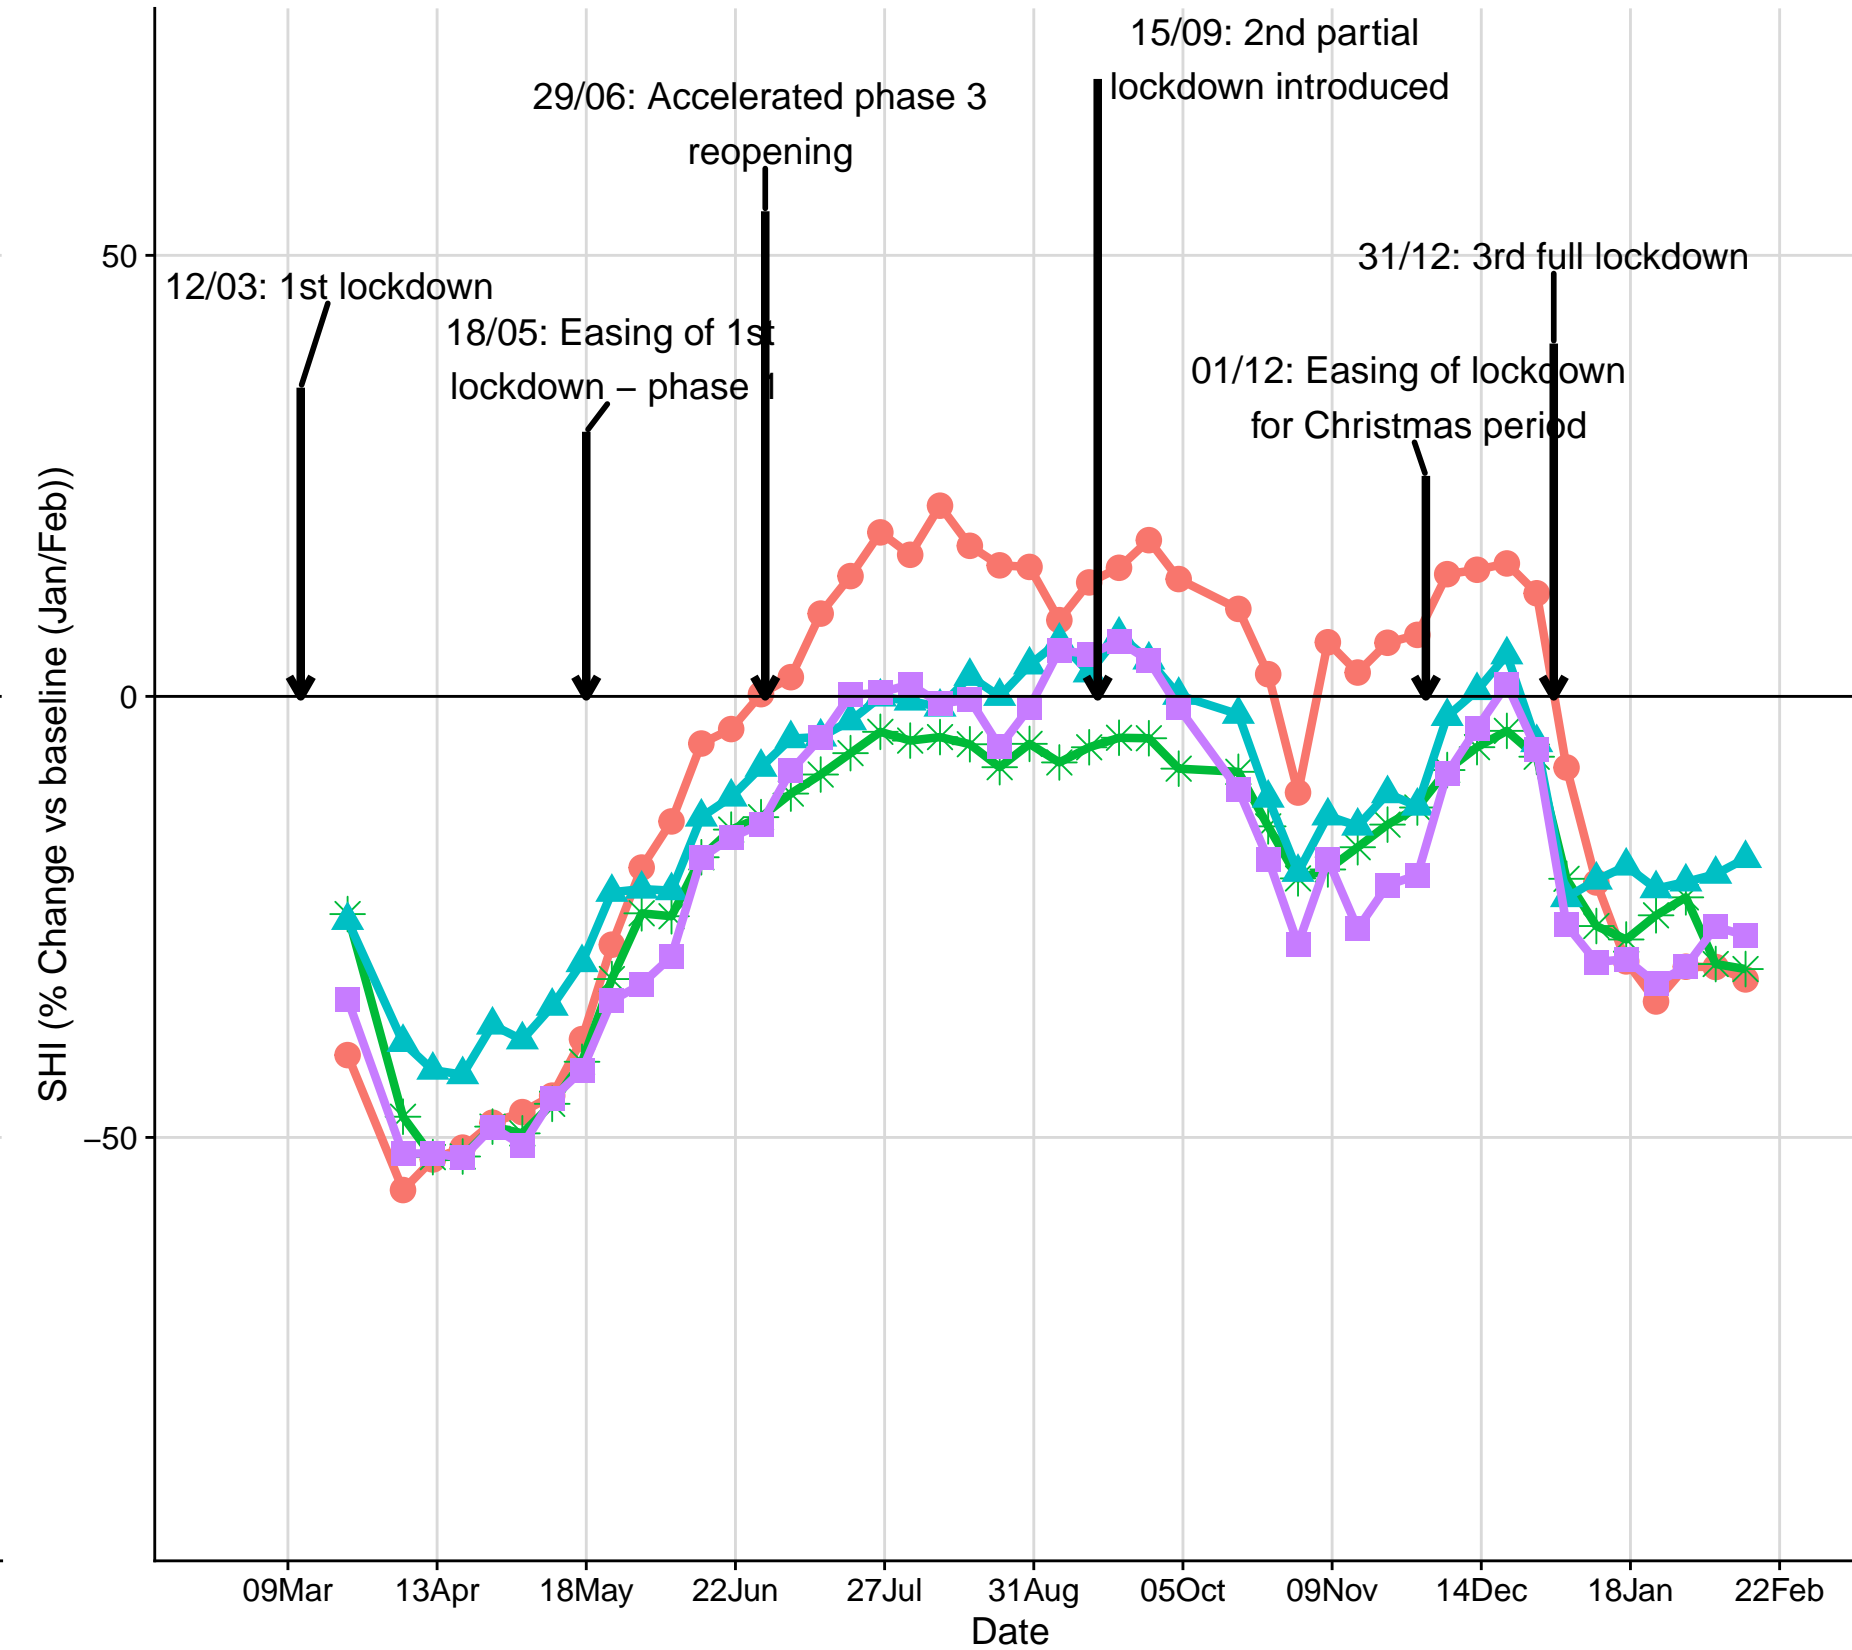

Age Bins ● u20 SHI \* 20–24 SHI ▲ 60–64 SHI ■ o65 SHI

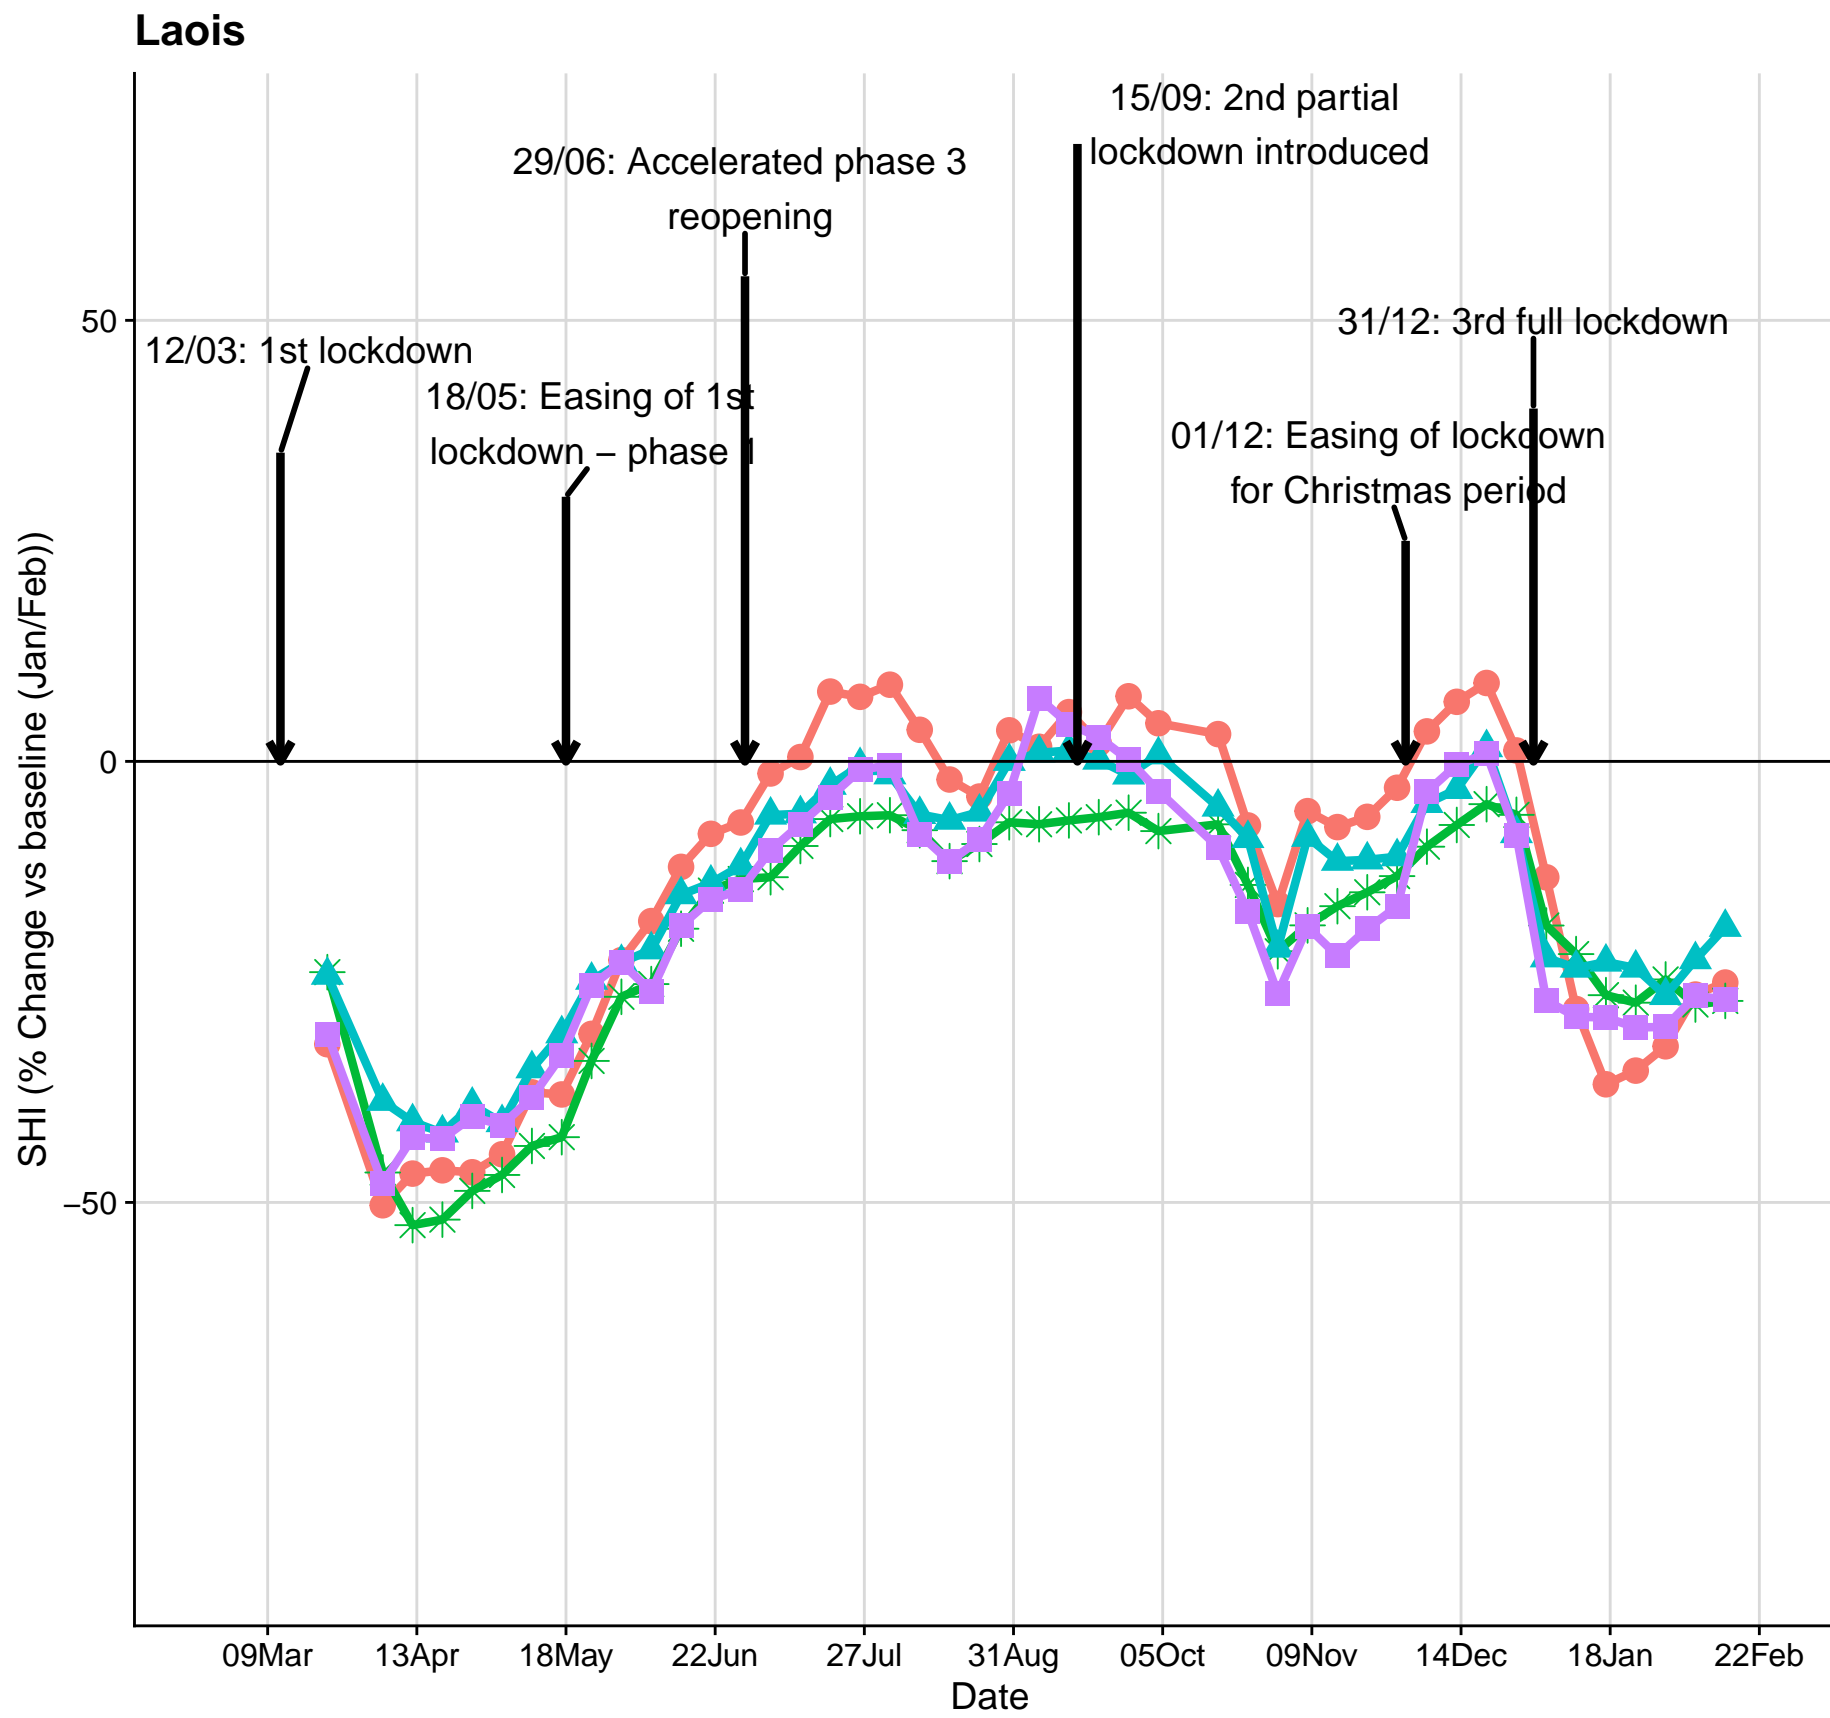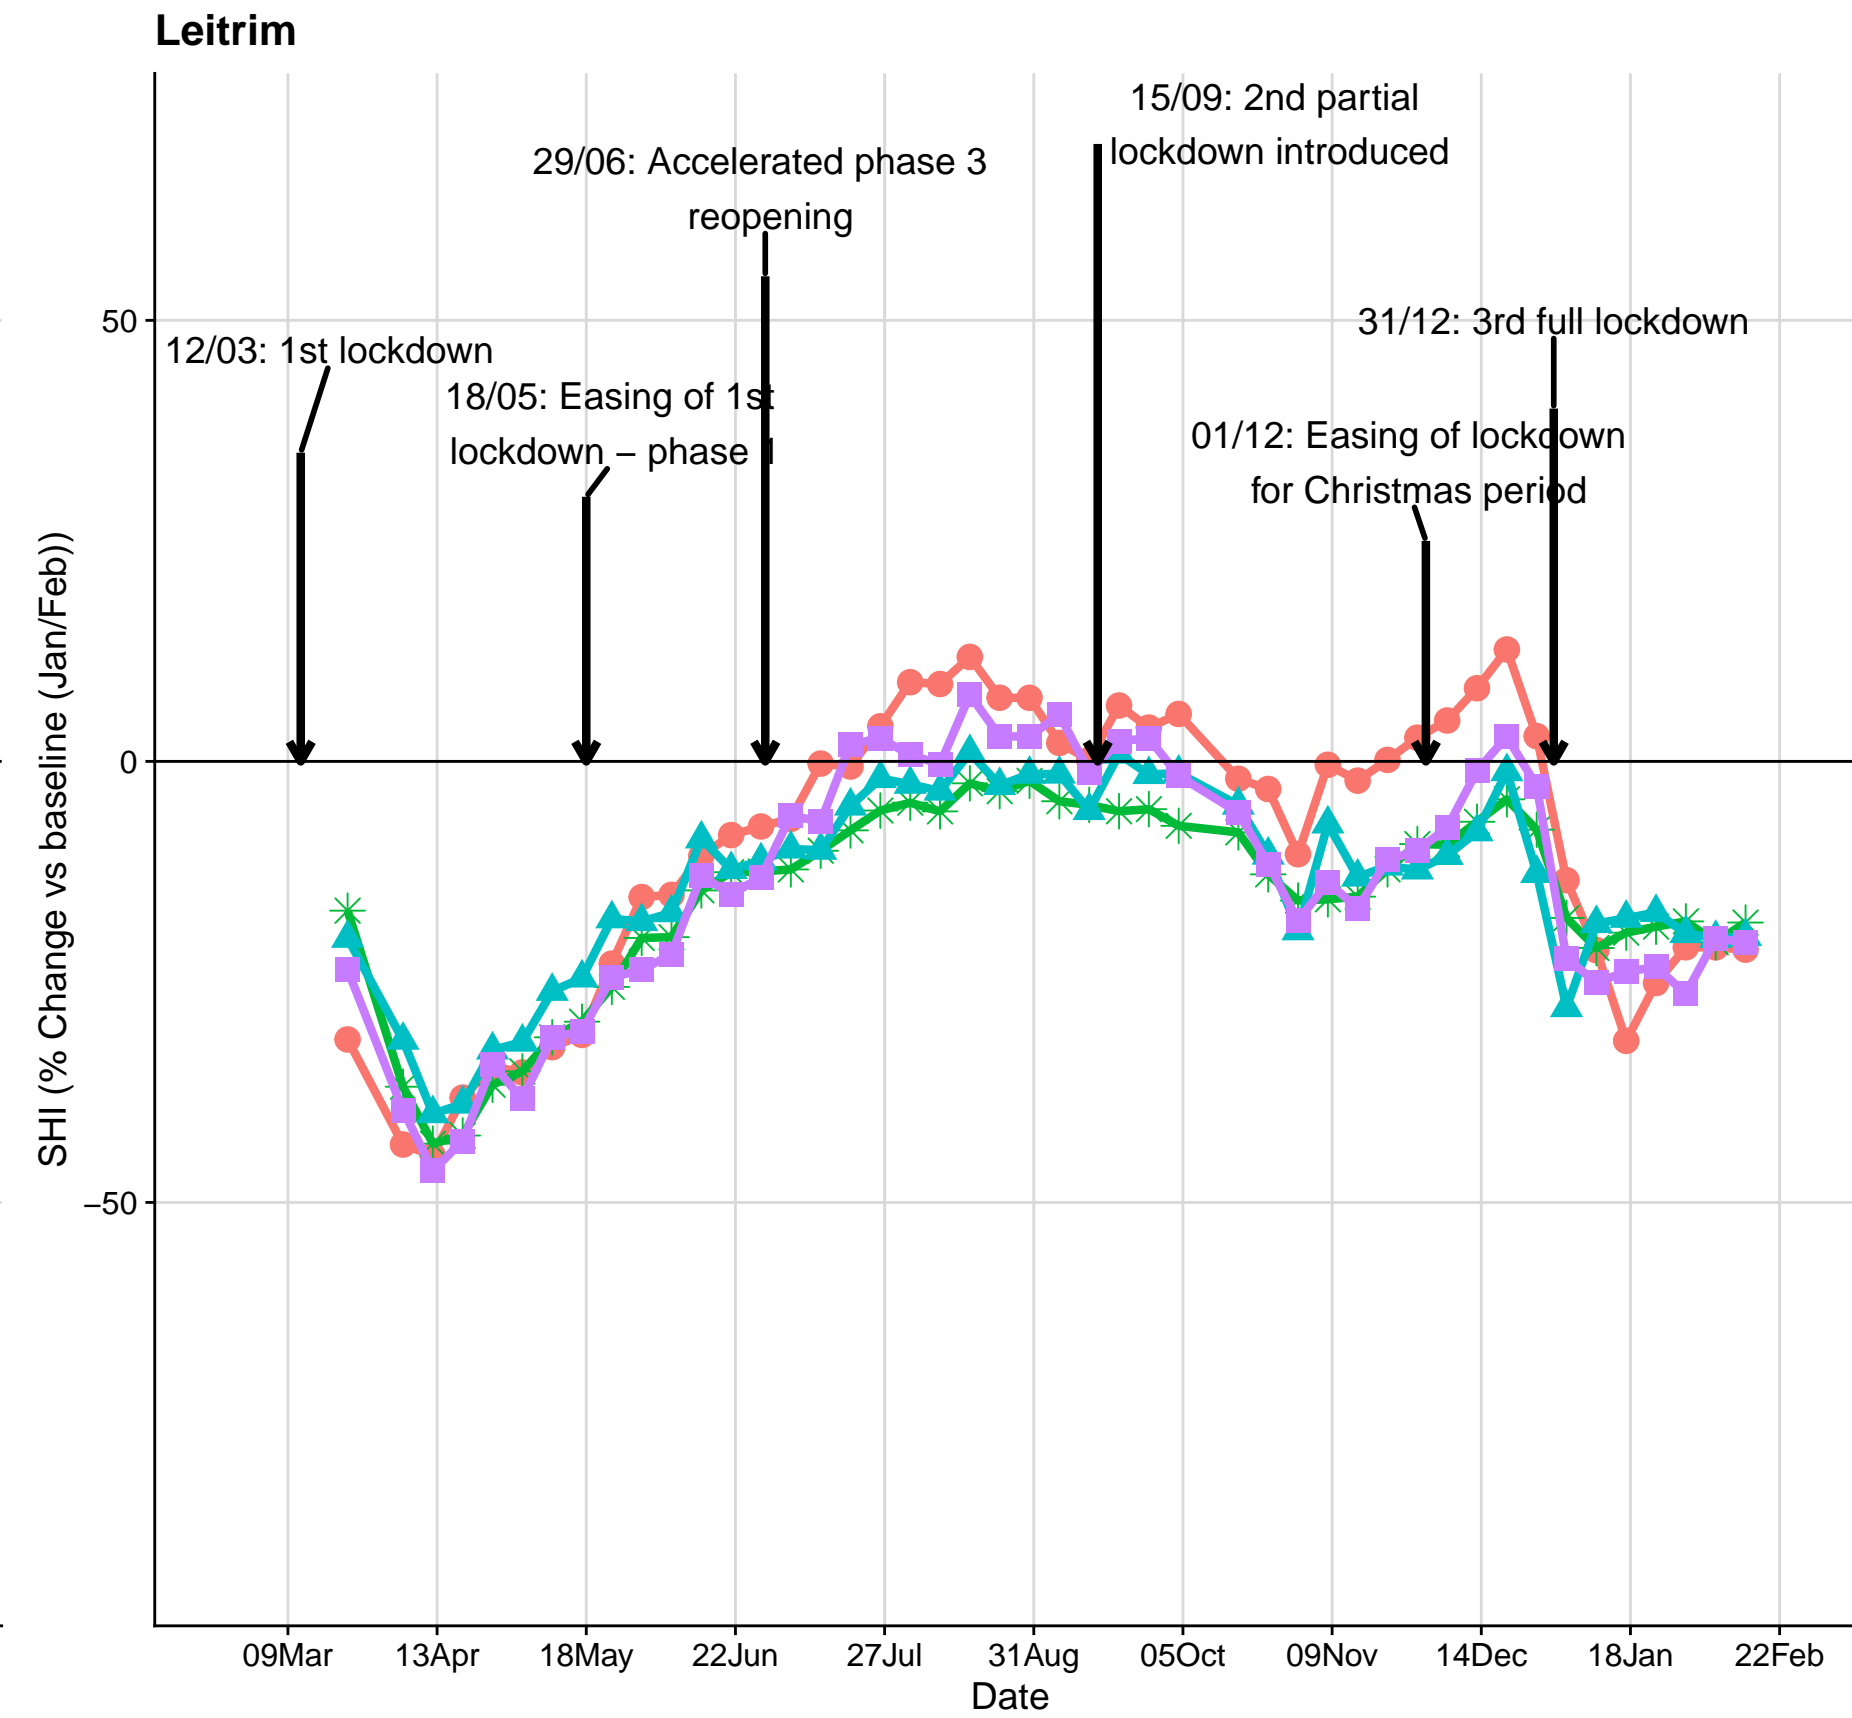

Age Bins ● u20 SHI \* 20–24 SHI ▲ 60–64 SHI ■ o65 SHI

## Limerick

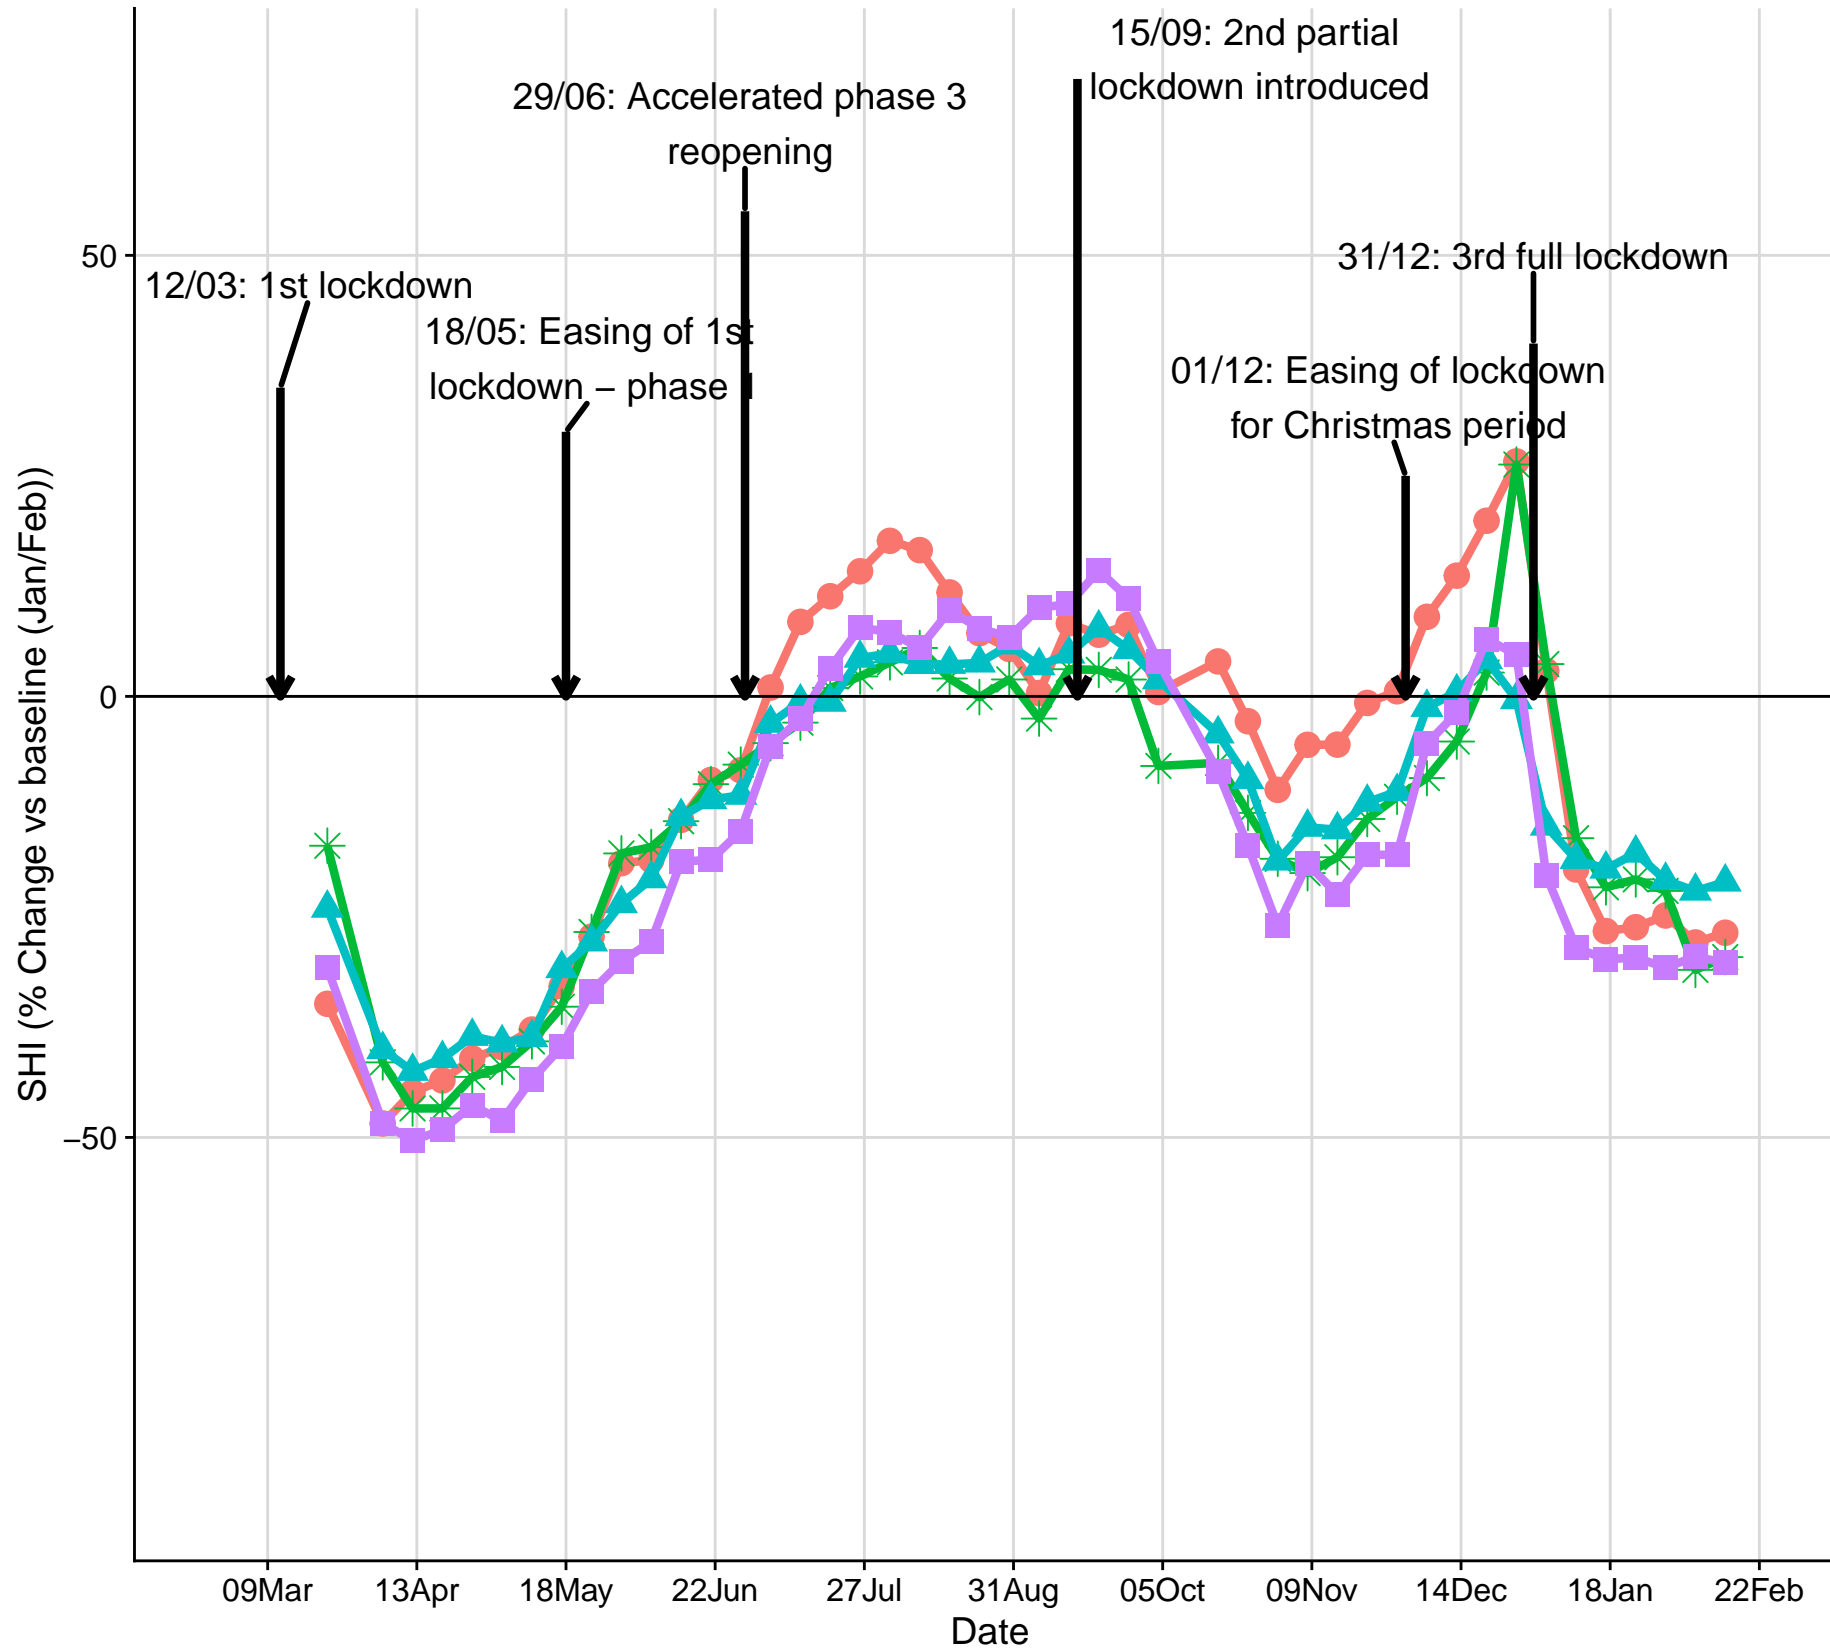

## Longford

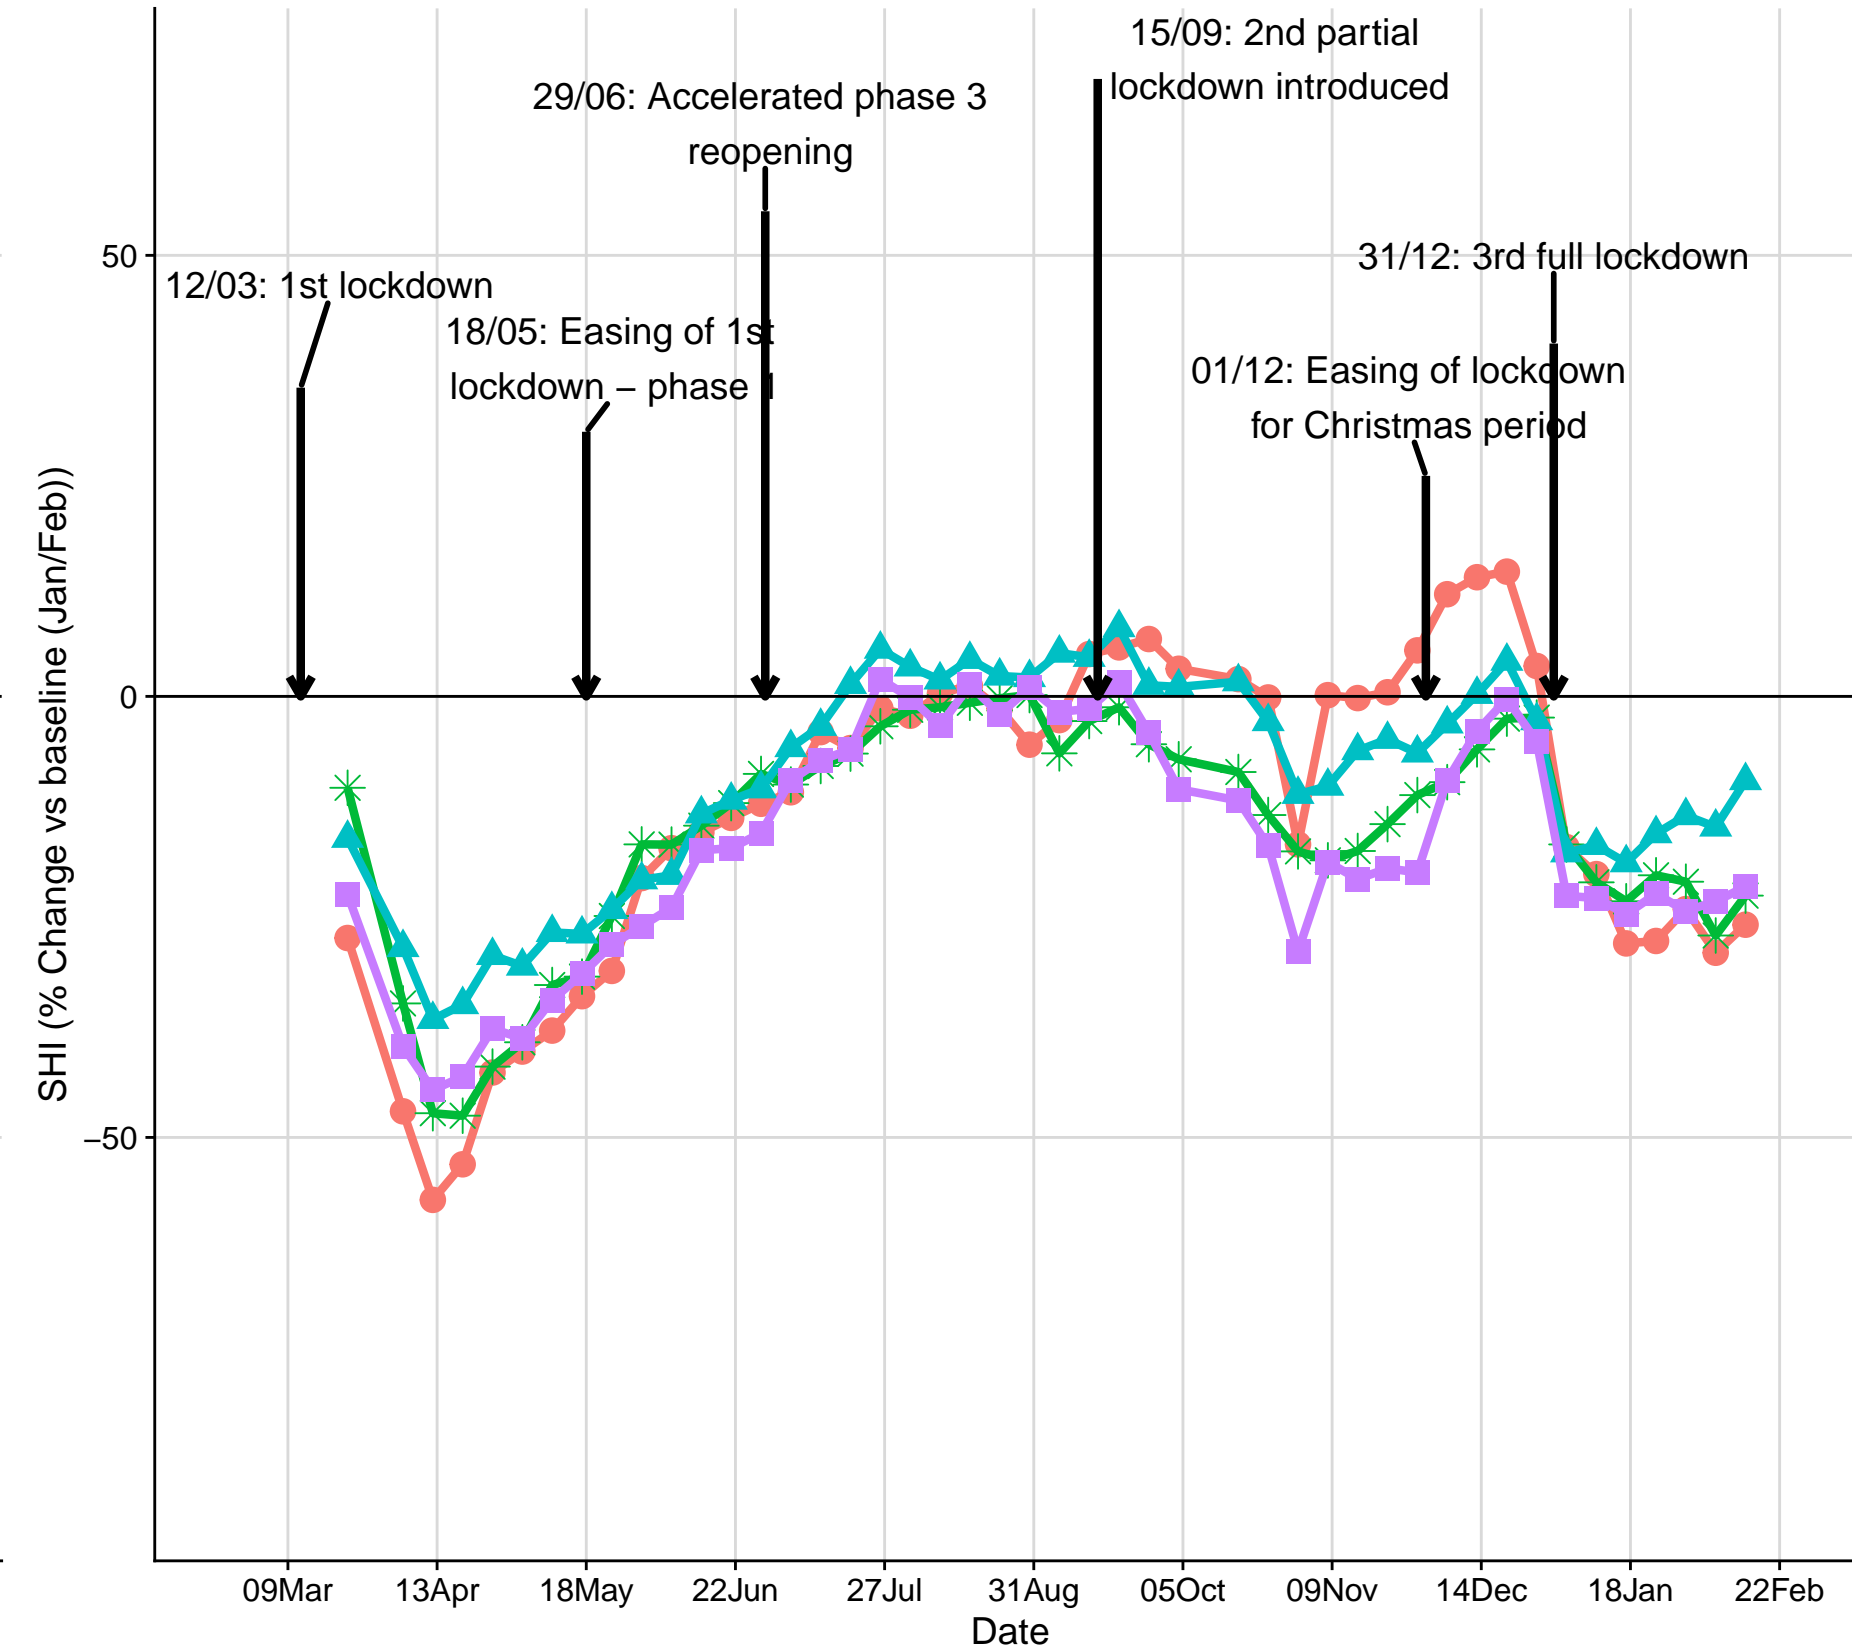

Age Bins u20 SHI 20–24 SHI 60–64 SHI o65 SHI

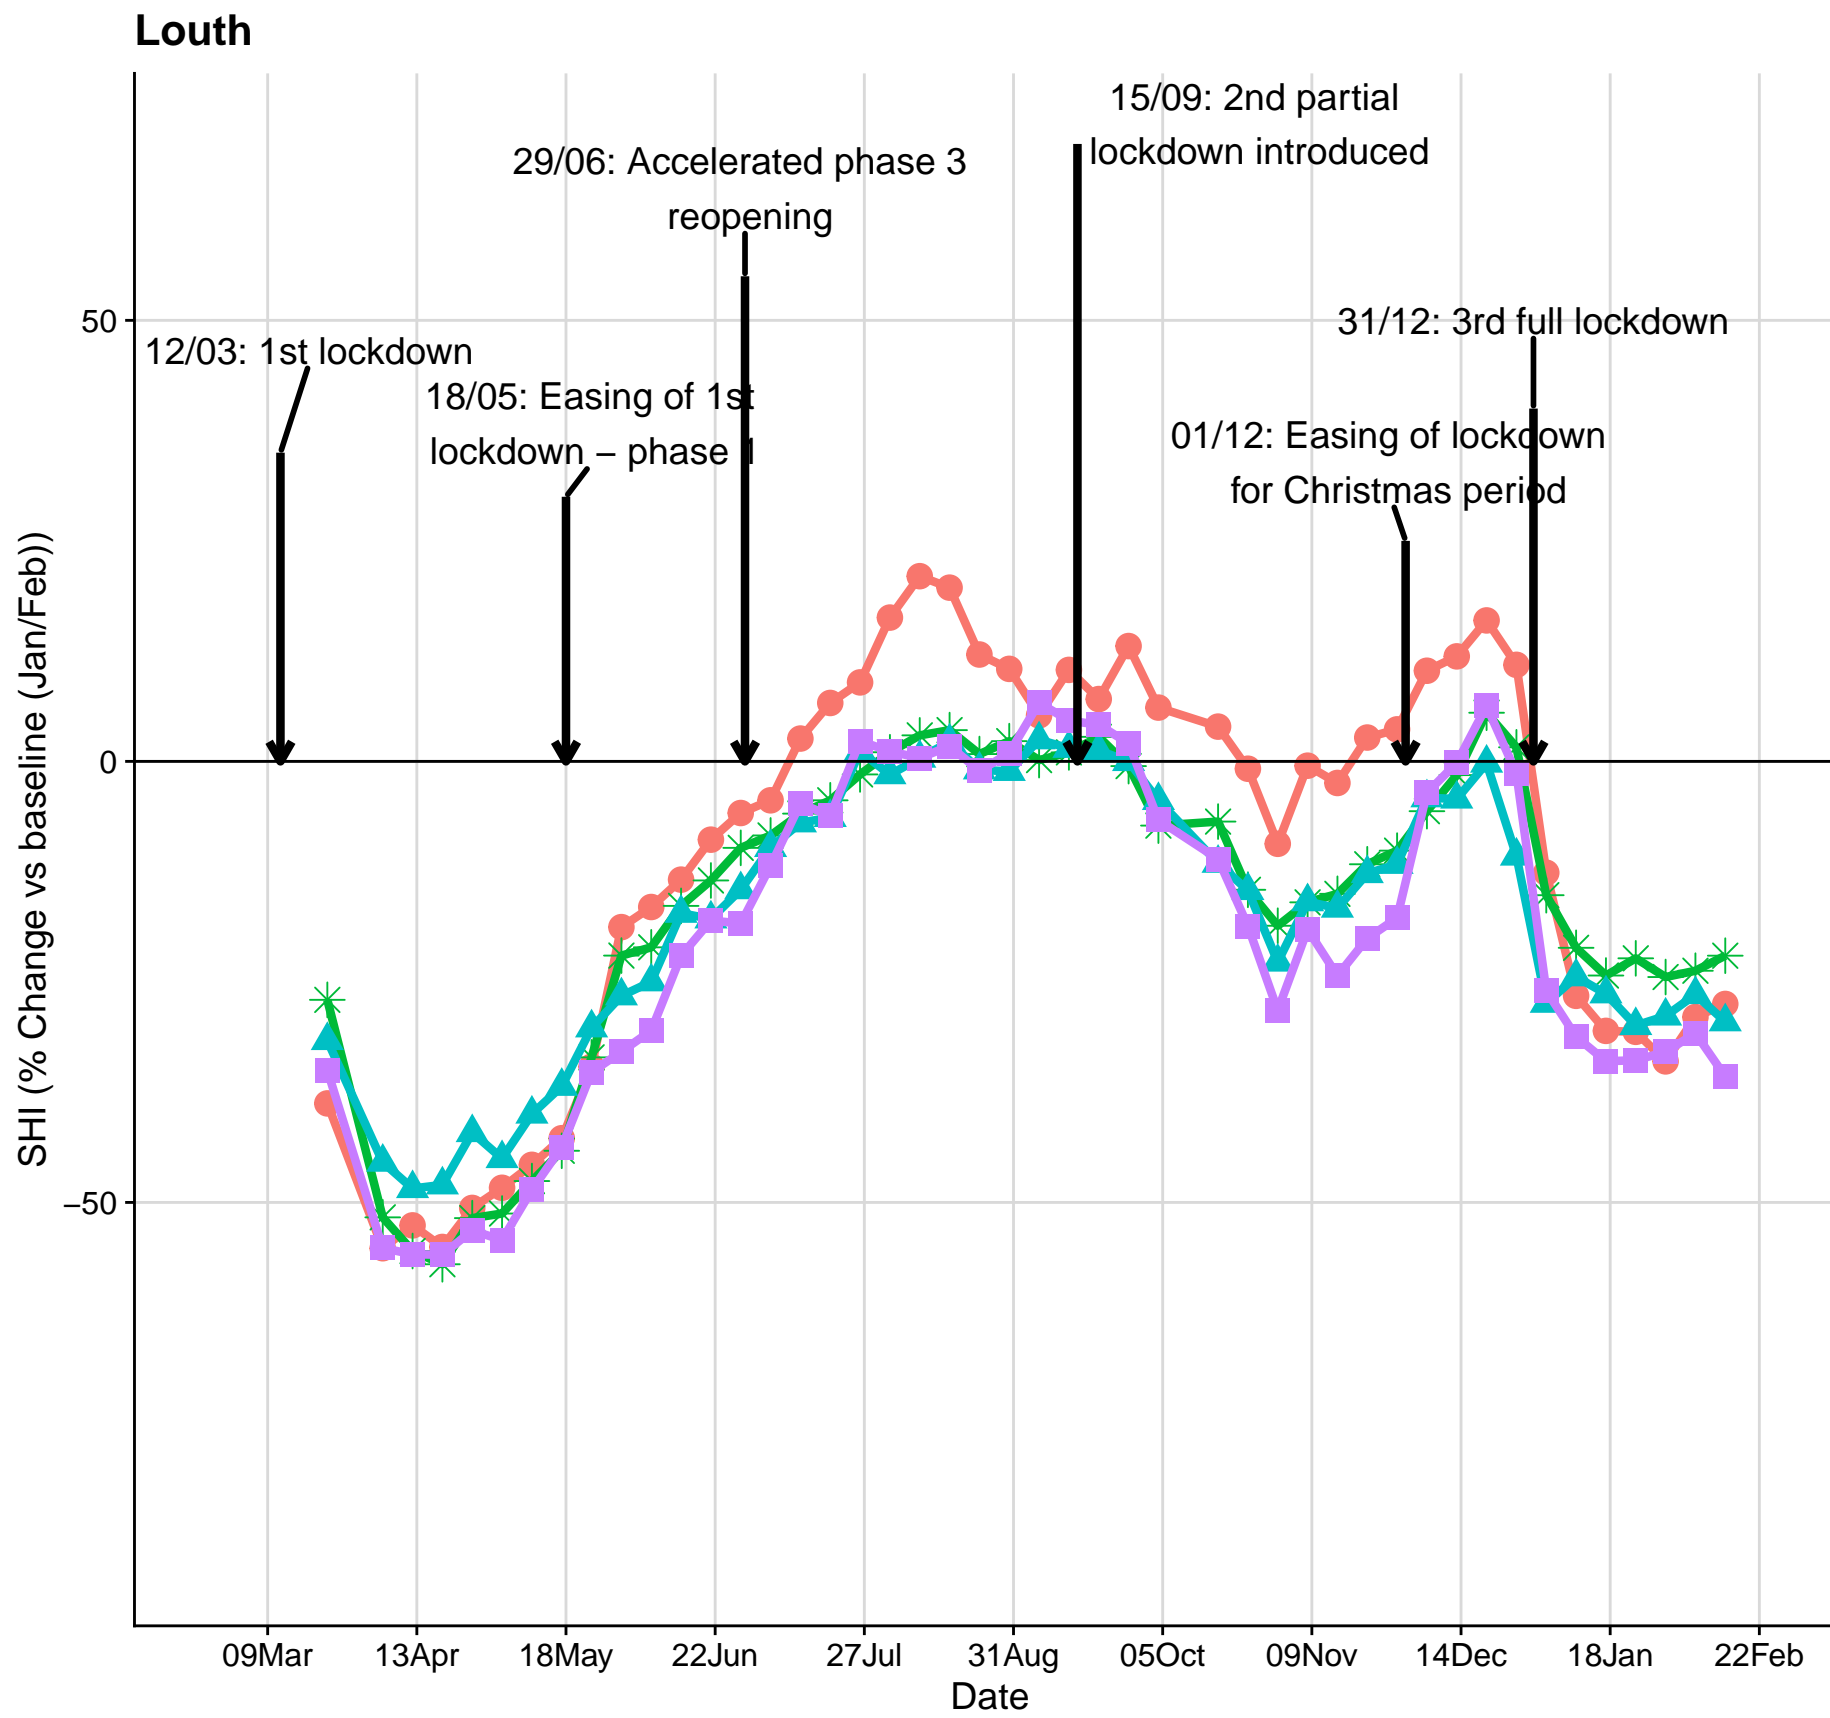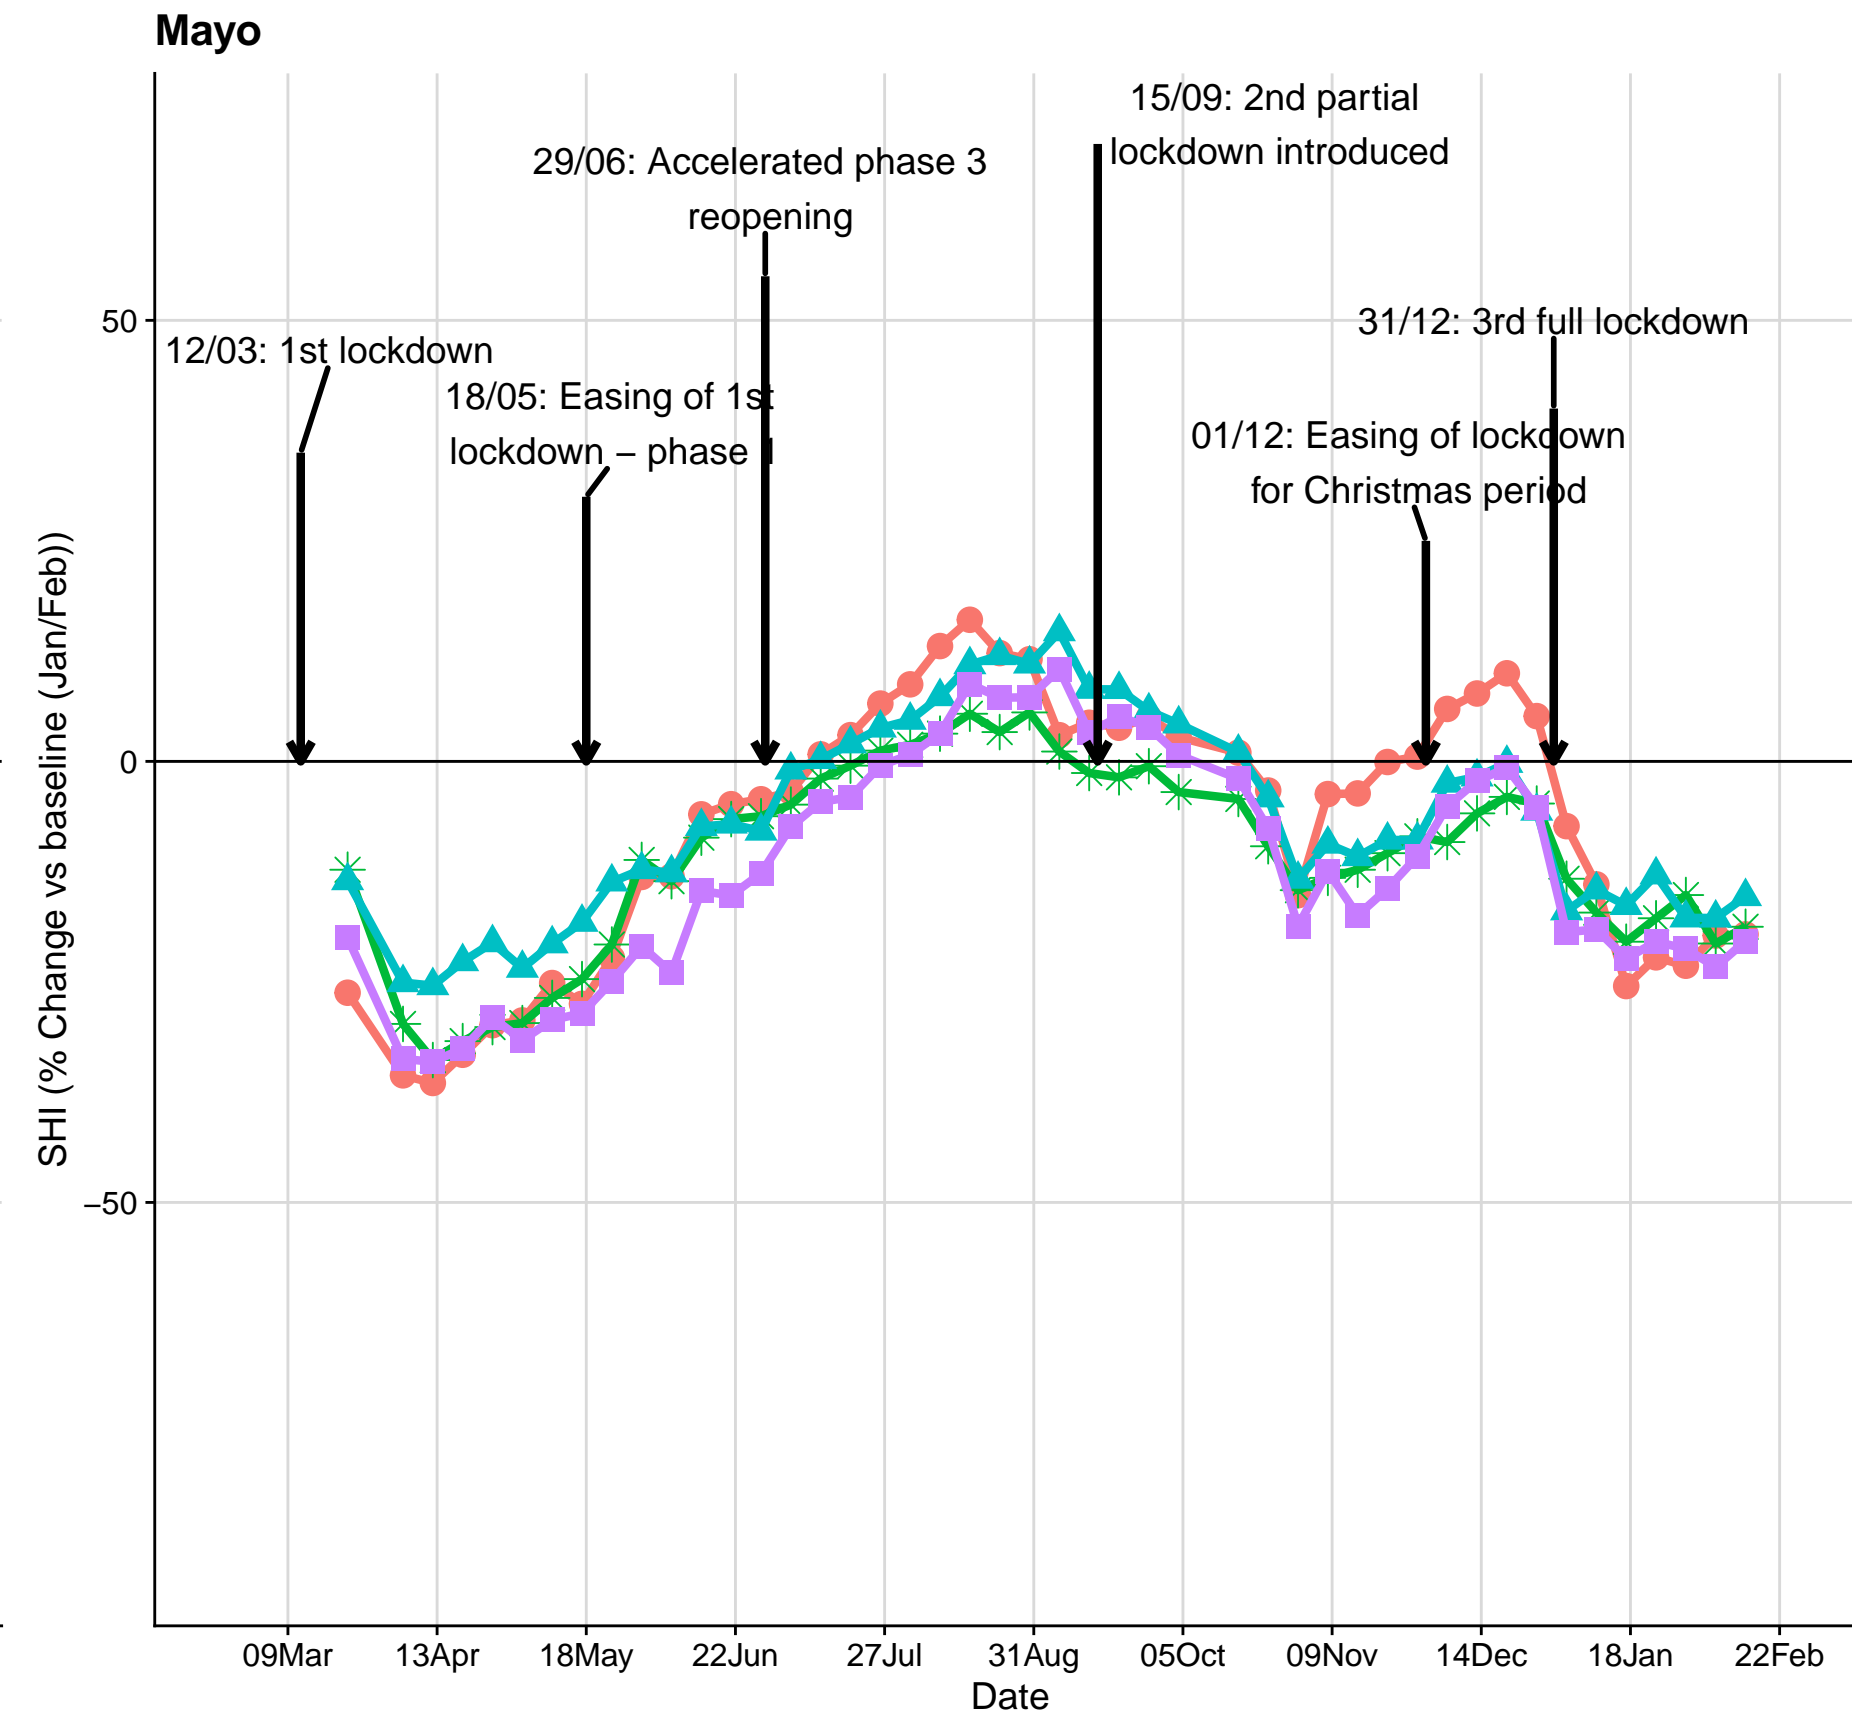

Age Bins u20 SHI 20–24 SHI 60–64 SHI o65 SHI

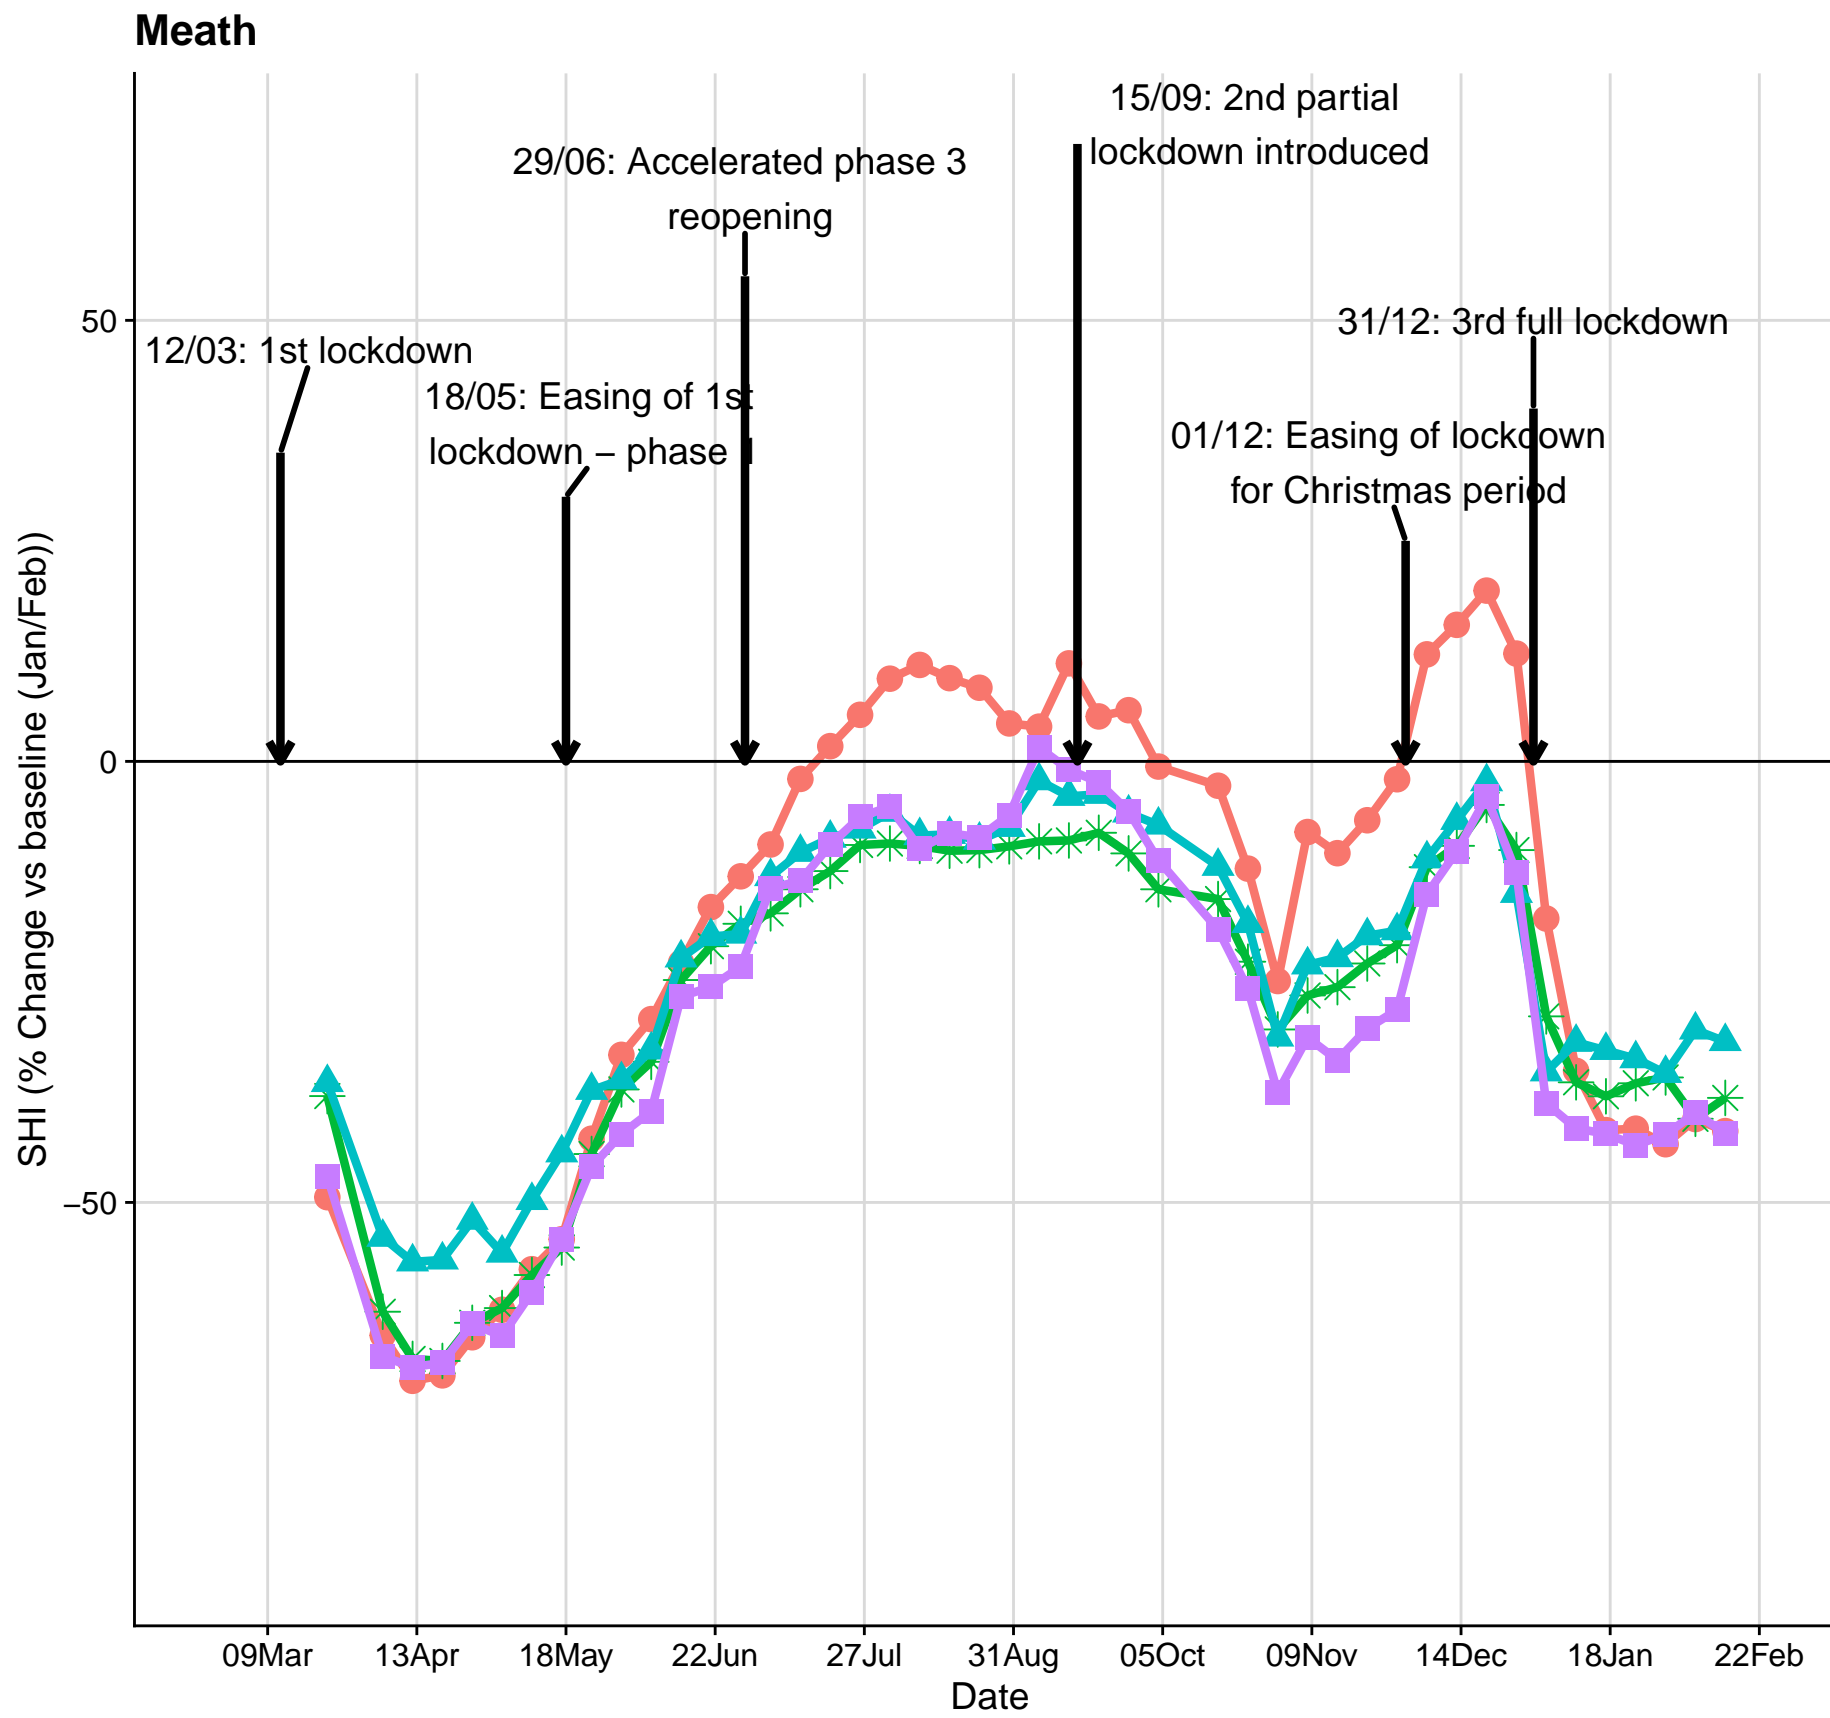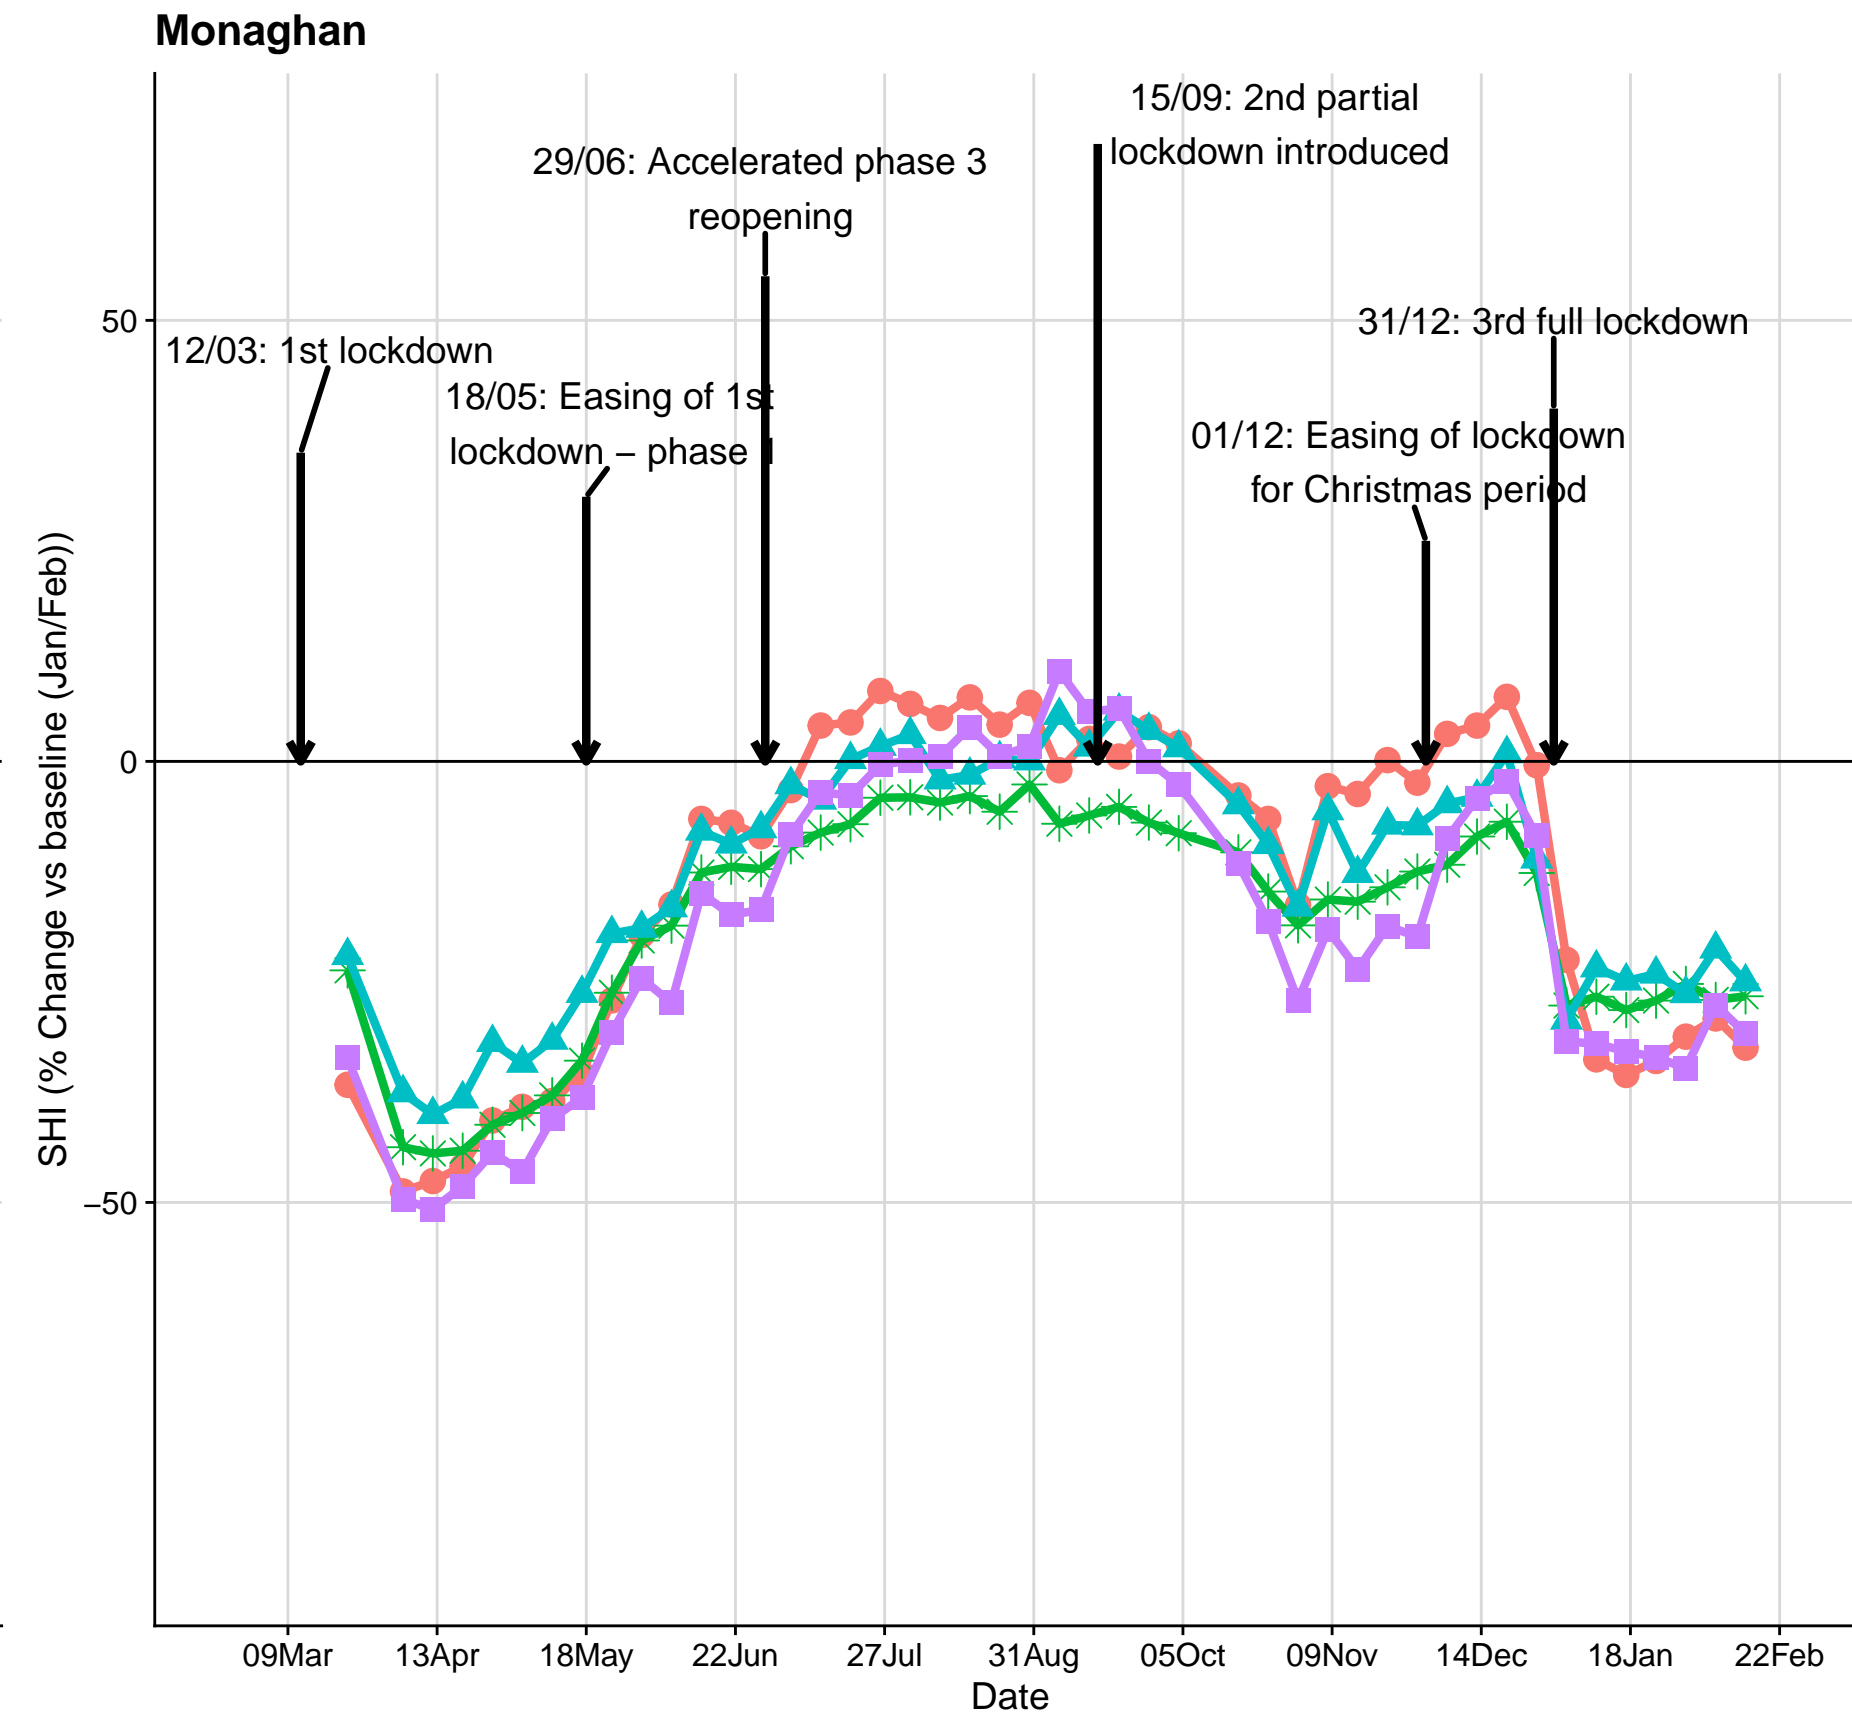

Age Bins ● u20 SHI \* 20–24 SHI ▲ 60–64 SHI ■ o65 SHI

**Offaly**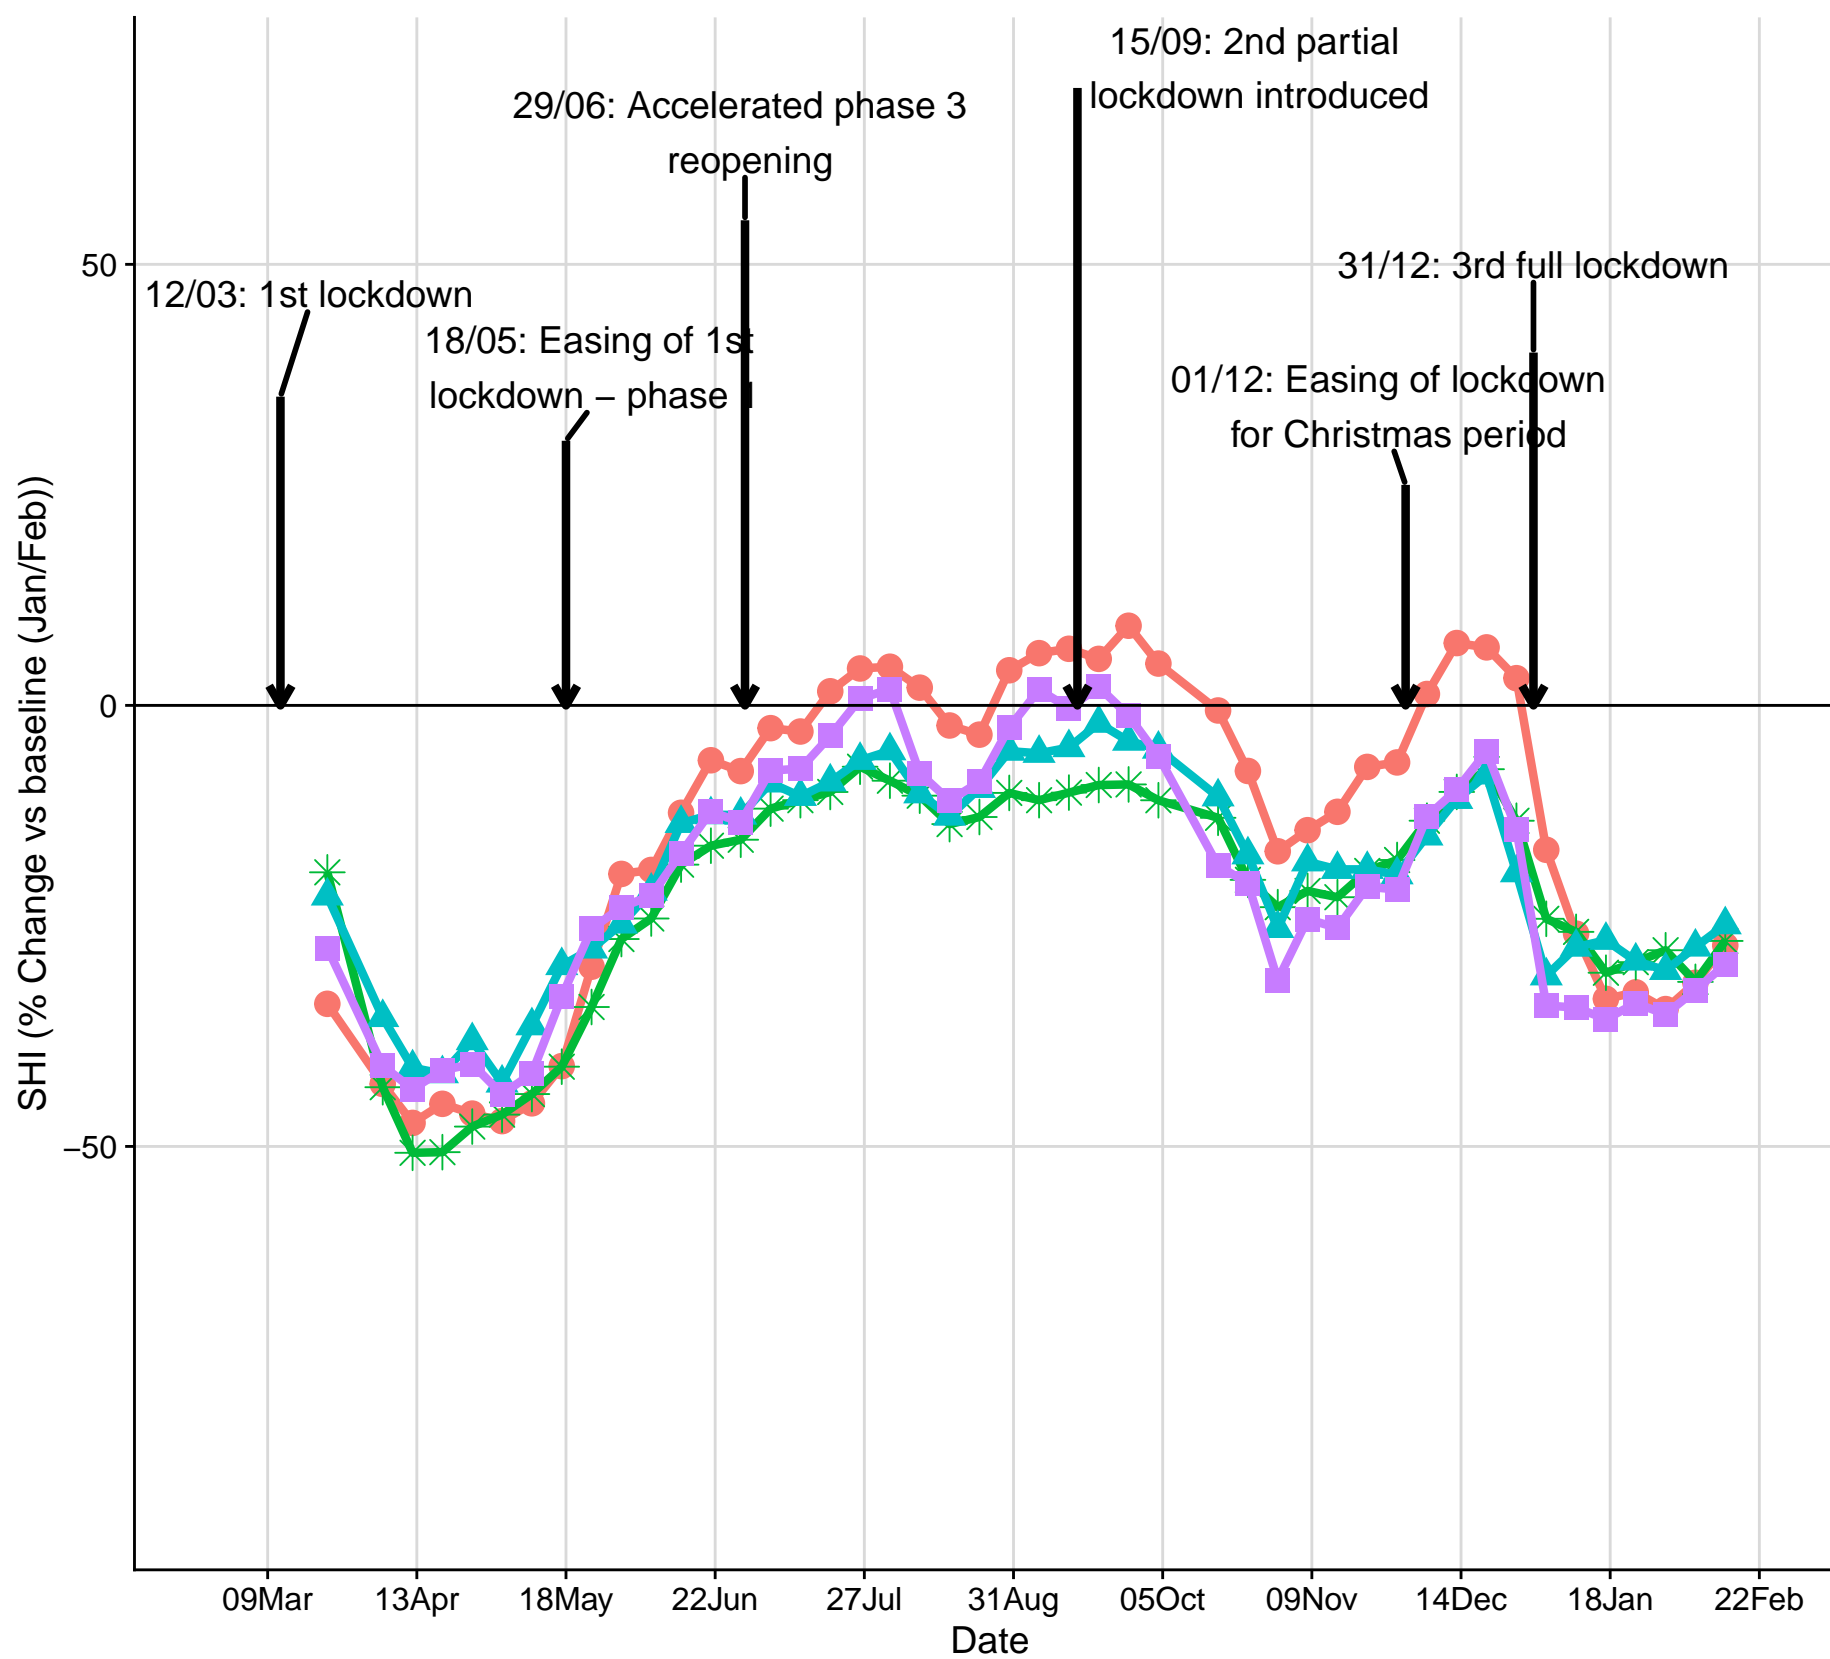**Roscommon**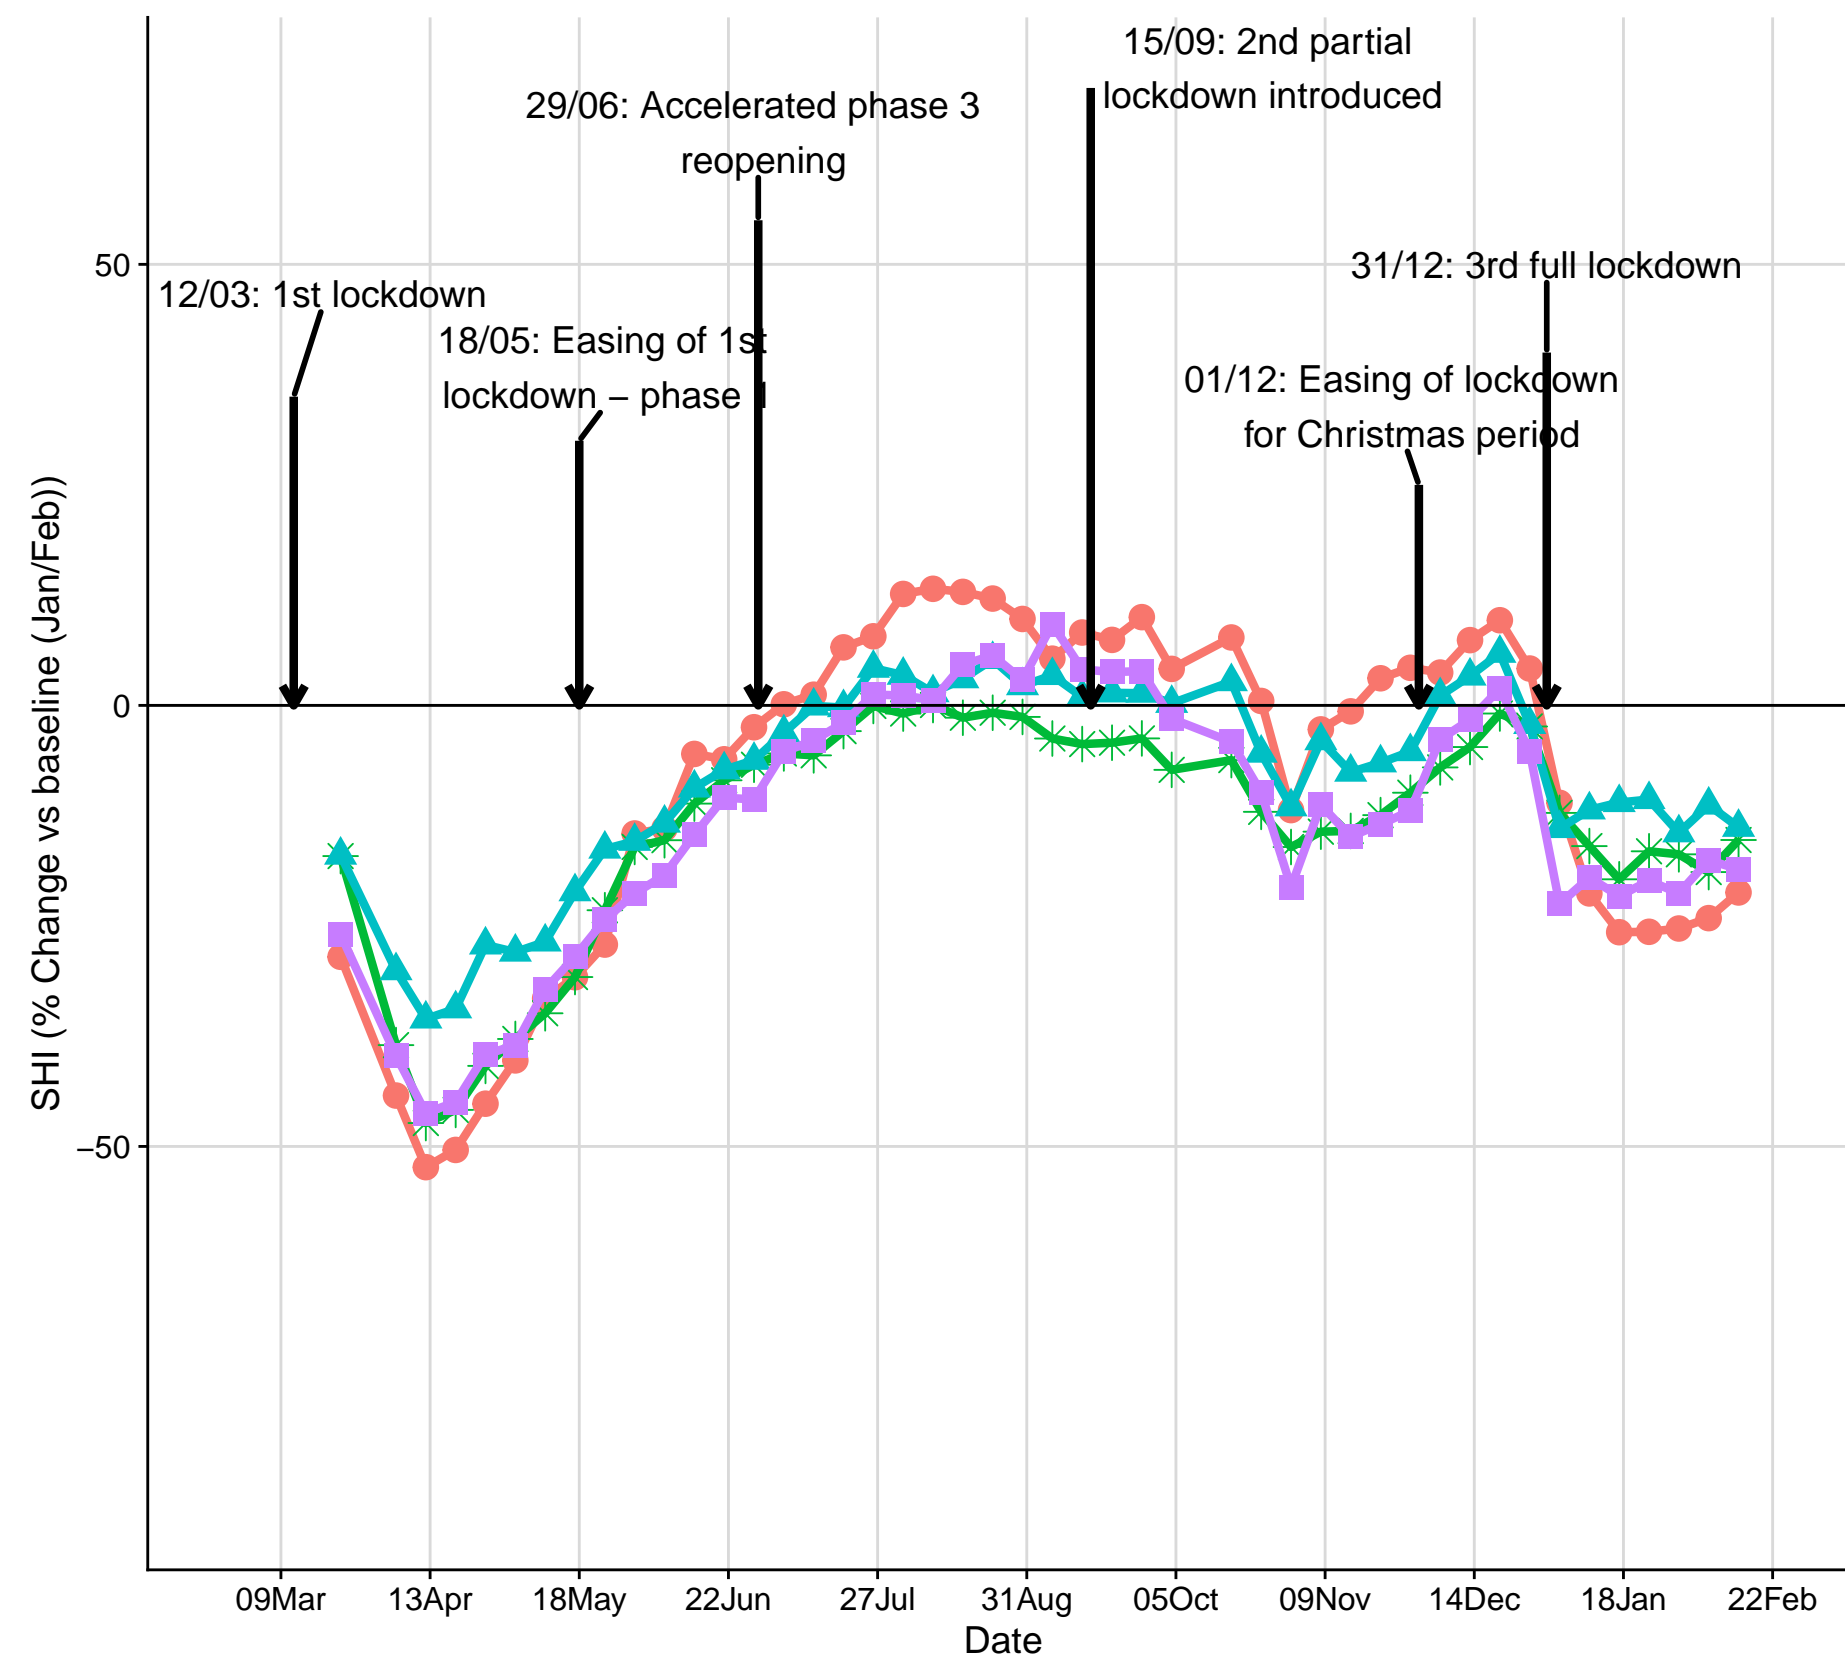

Age Bins ● u20 SHI \* 20–24 SHI ▲ 60–64 SHI ■ o65 SHI

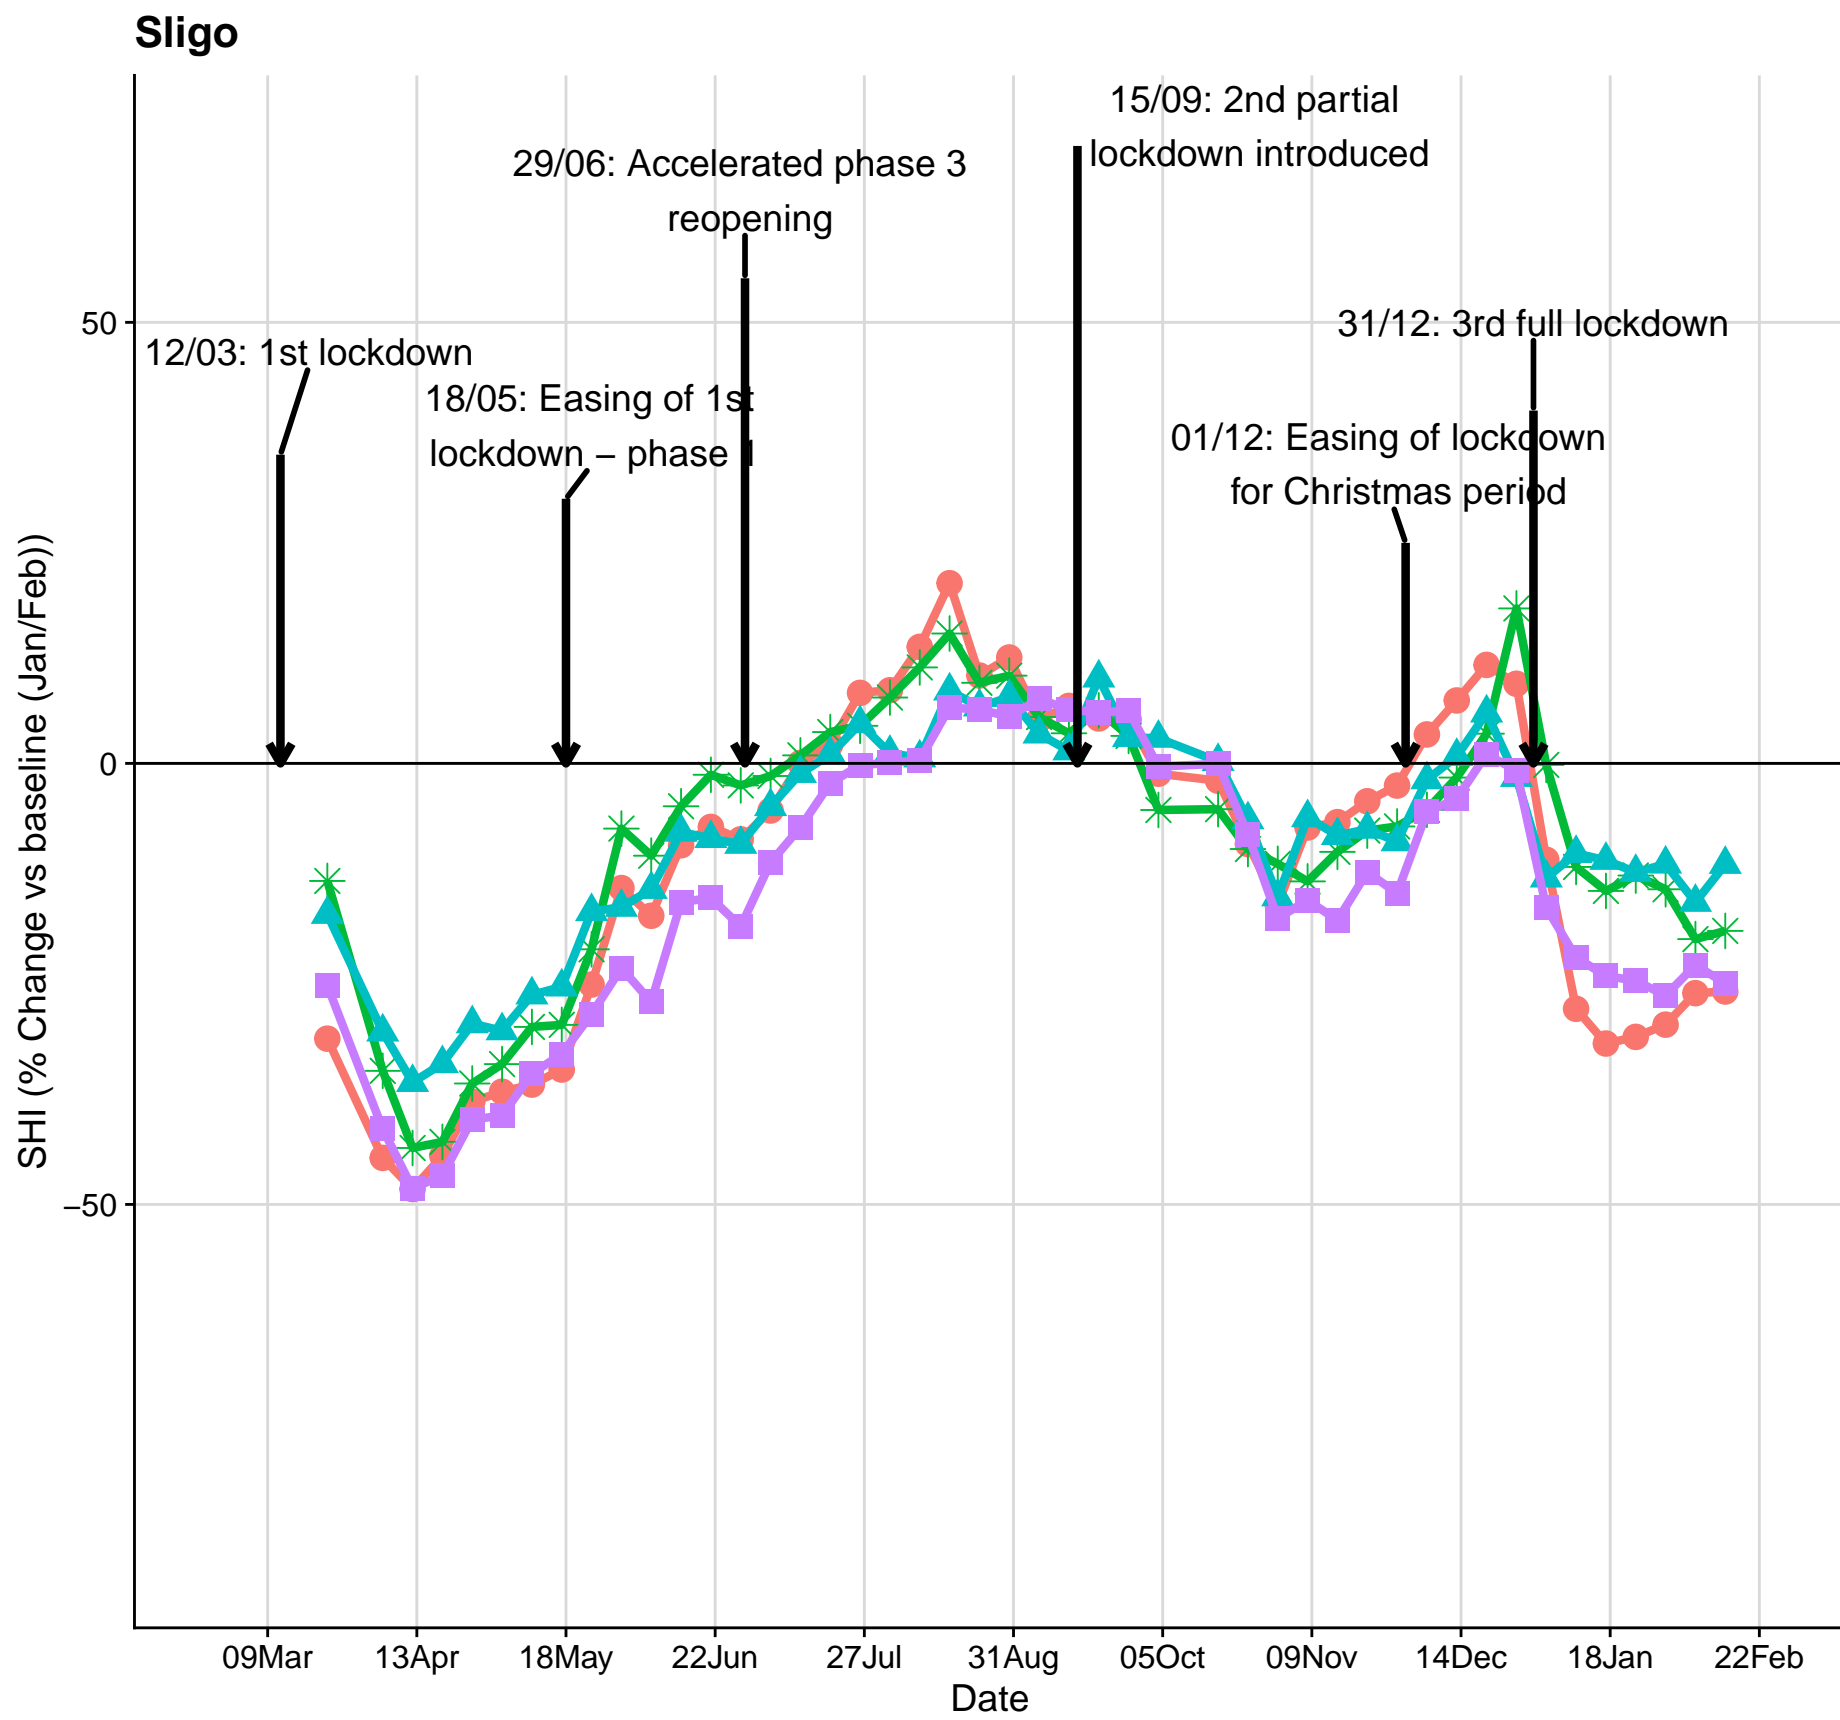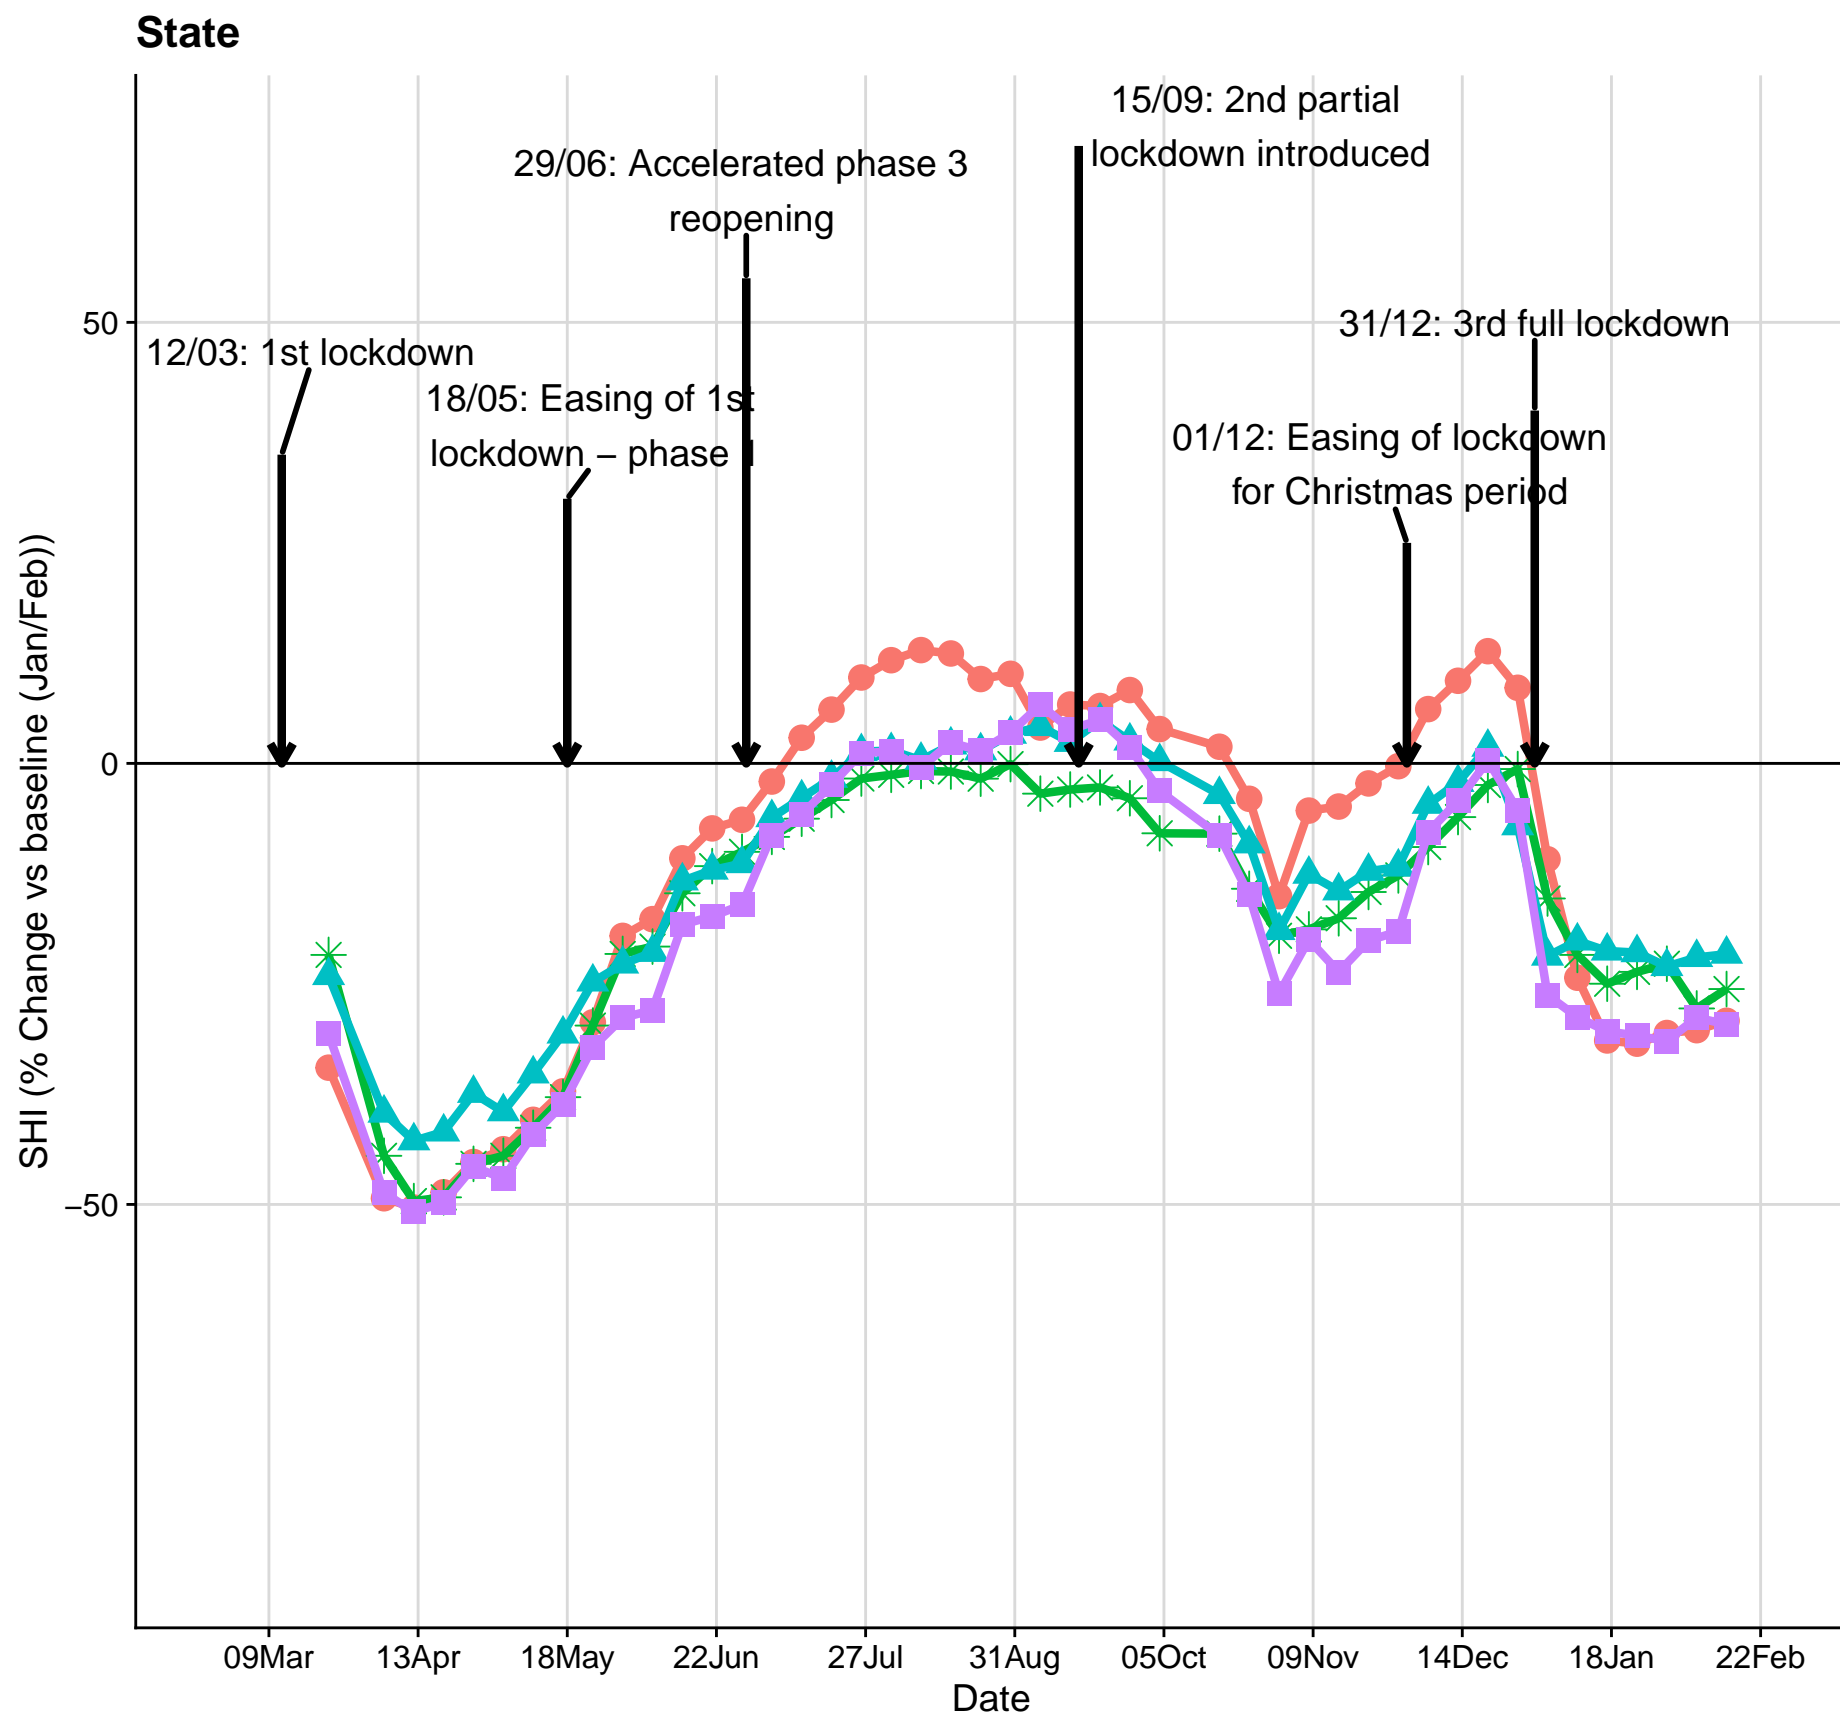

**State (Minus Dublin)**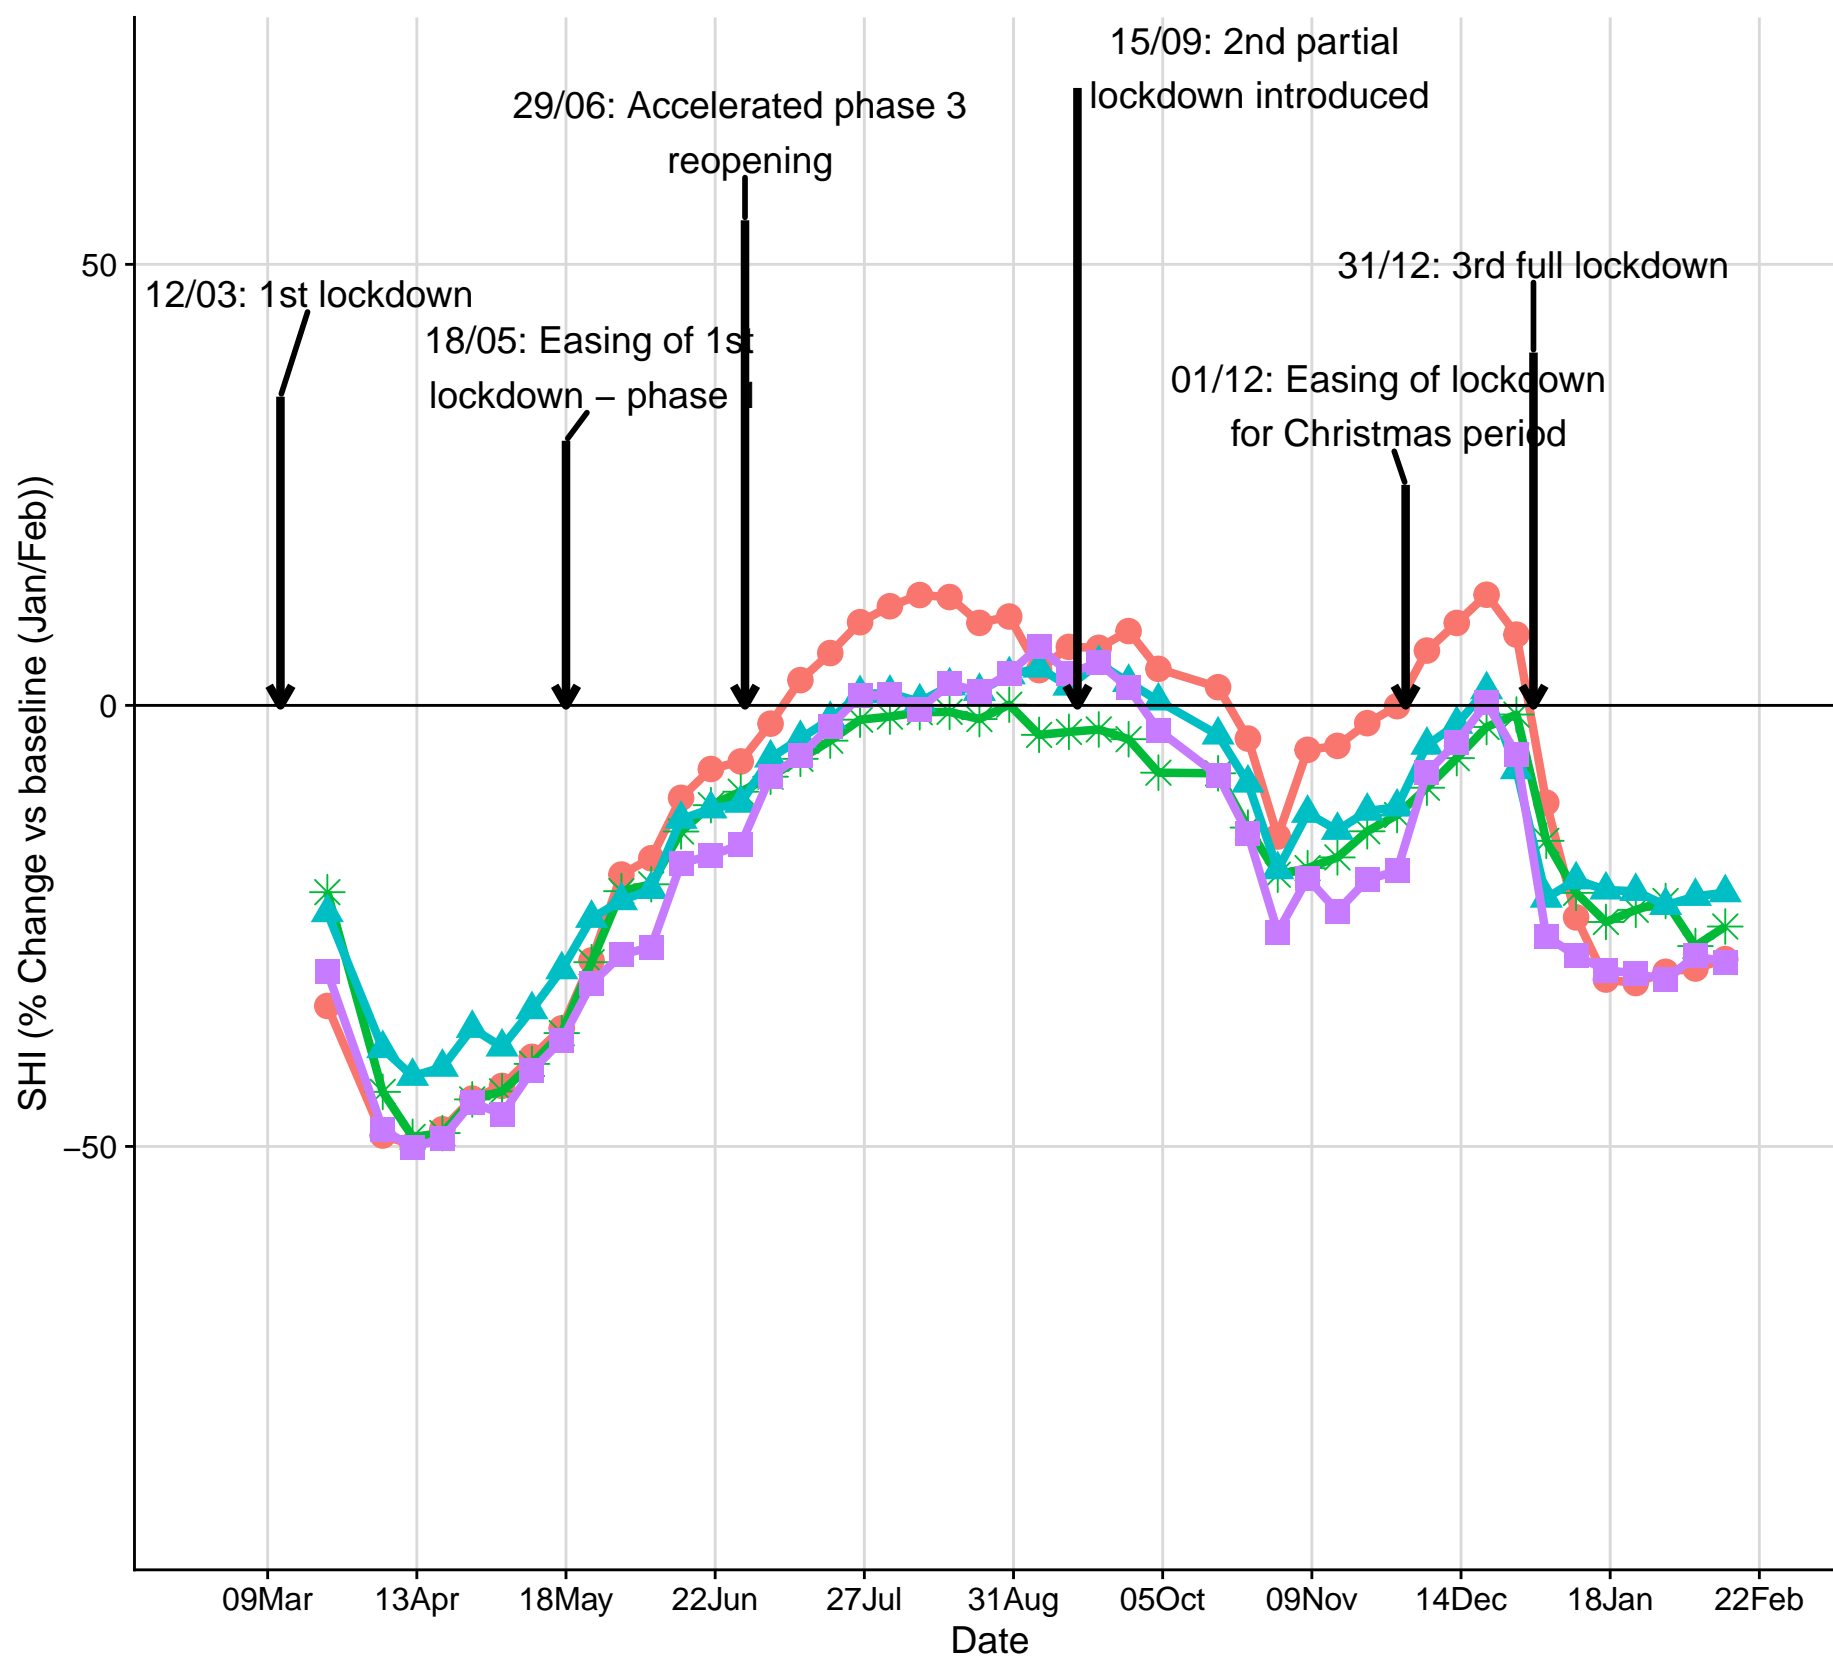**Tipperary**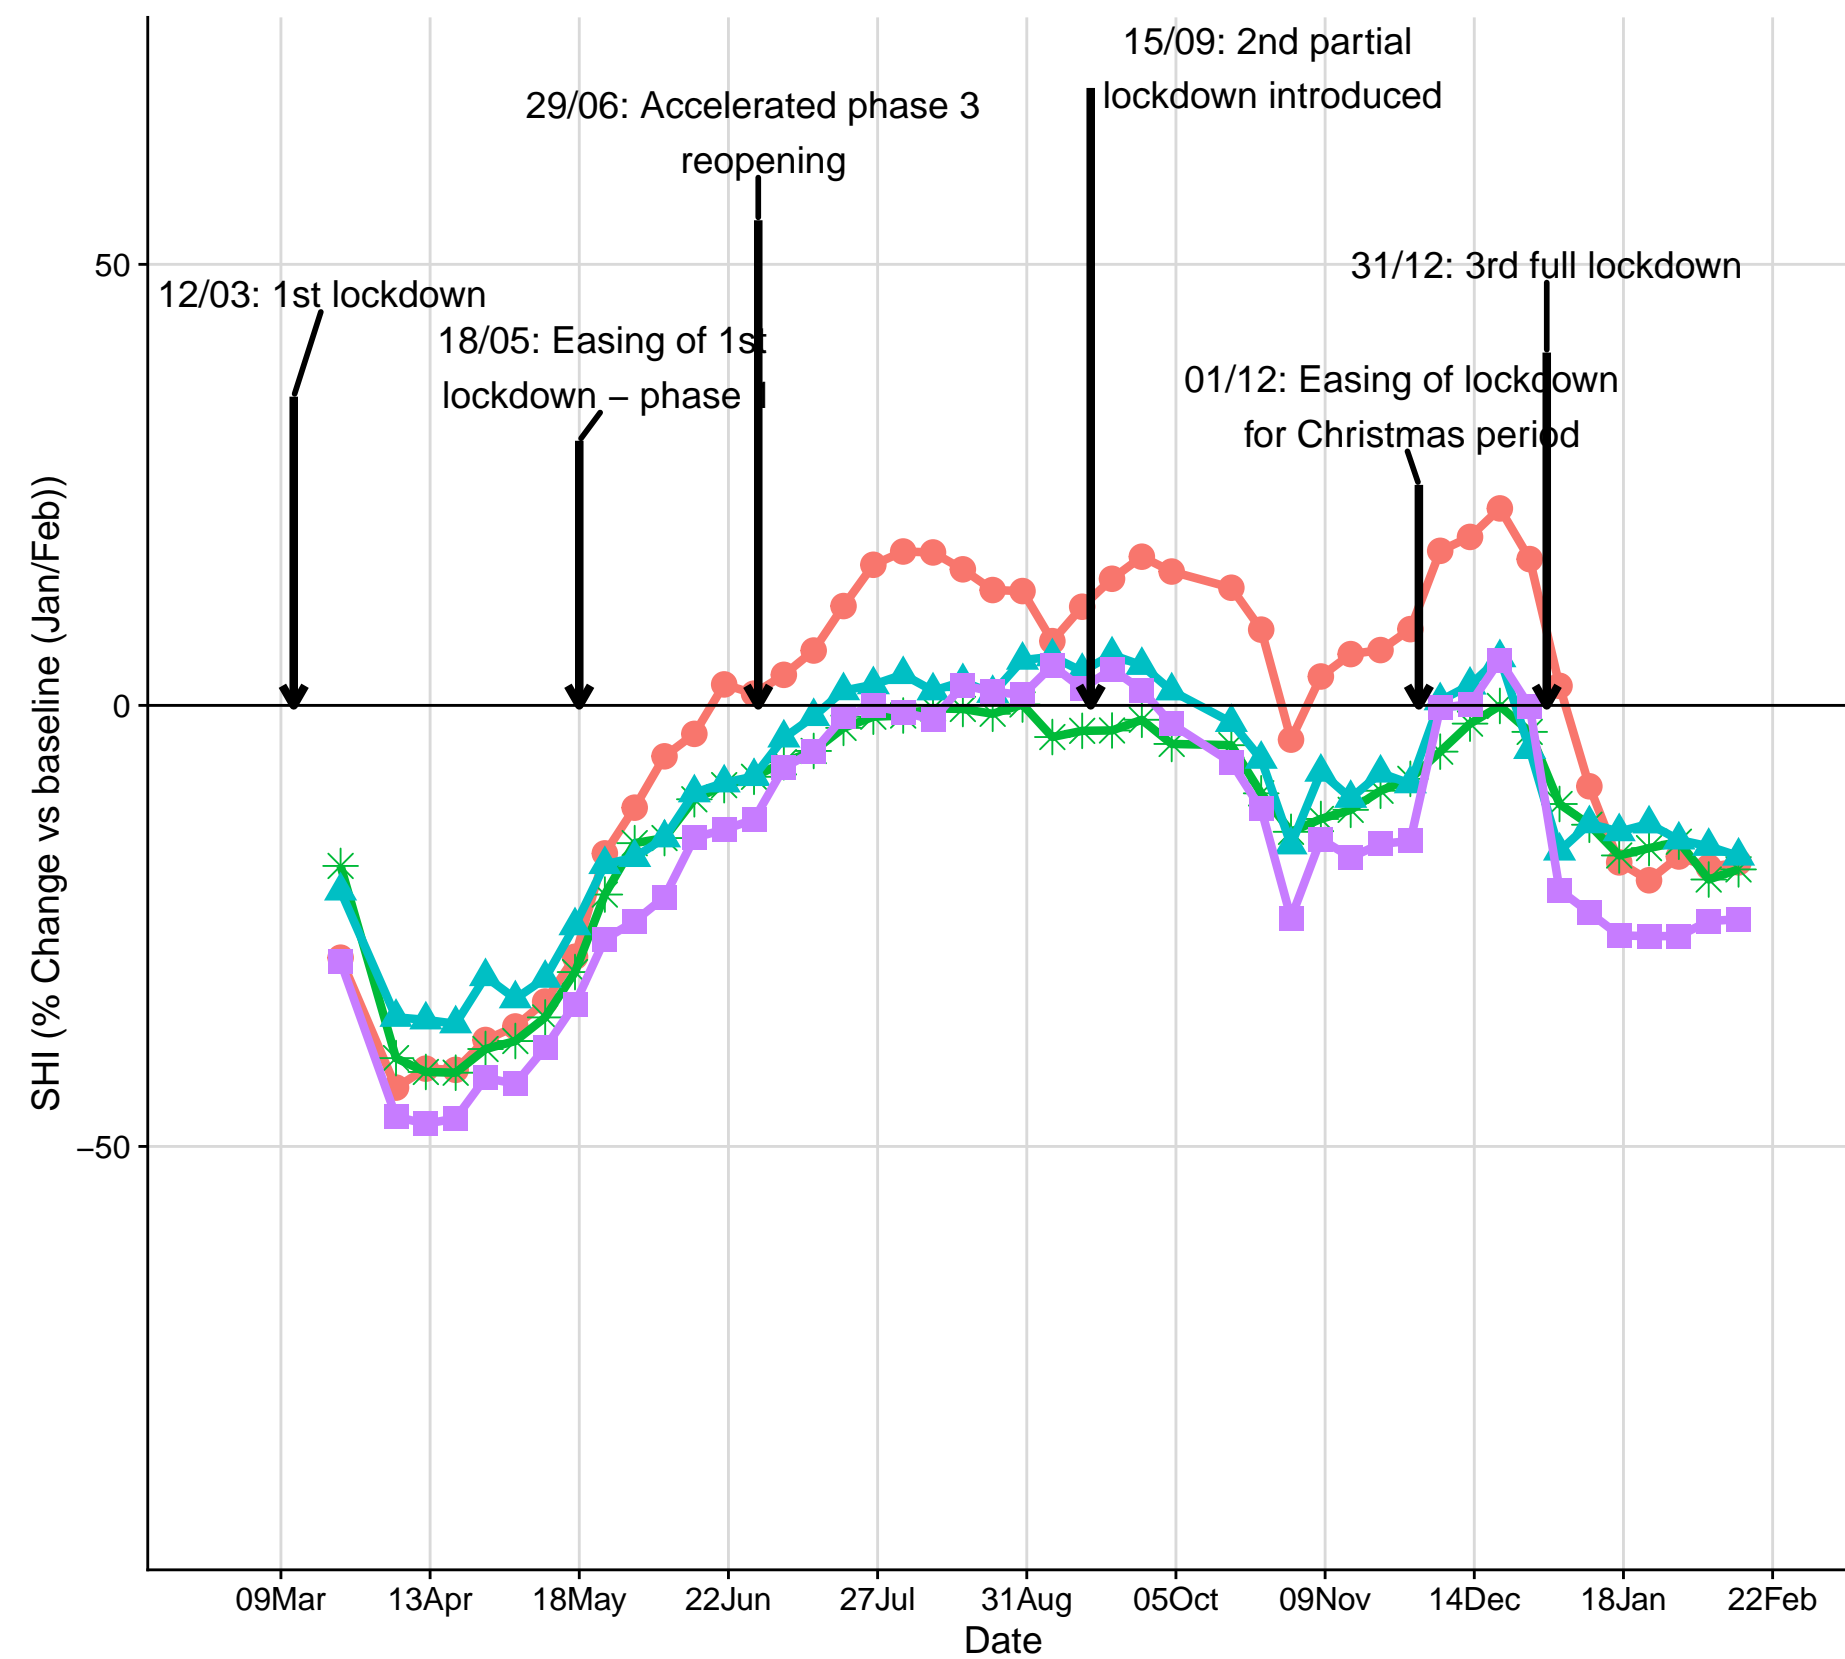

Age Bins

- u20 SHI
- 20–24 SHI
- 60–64 SHI
- o65 SHI

## Waterford

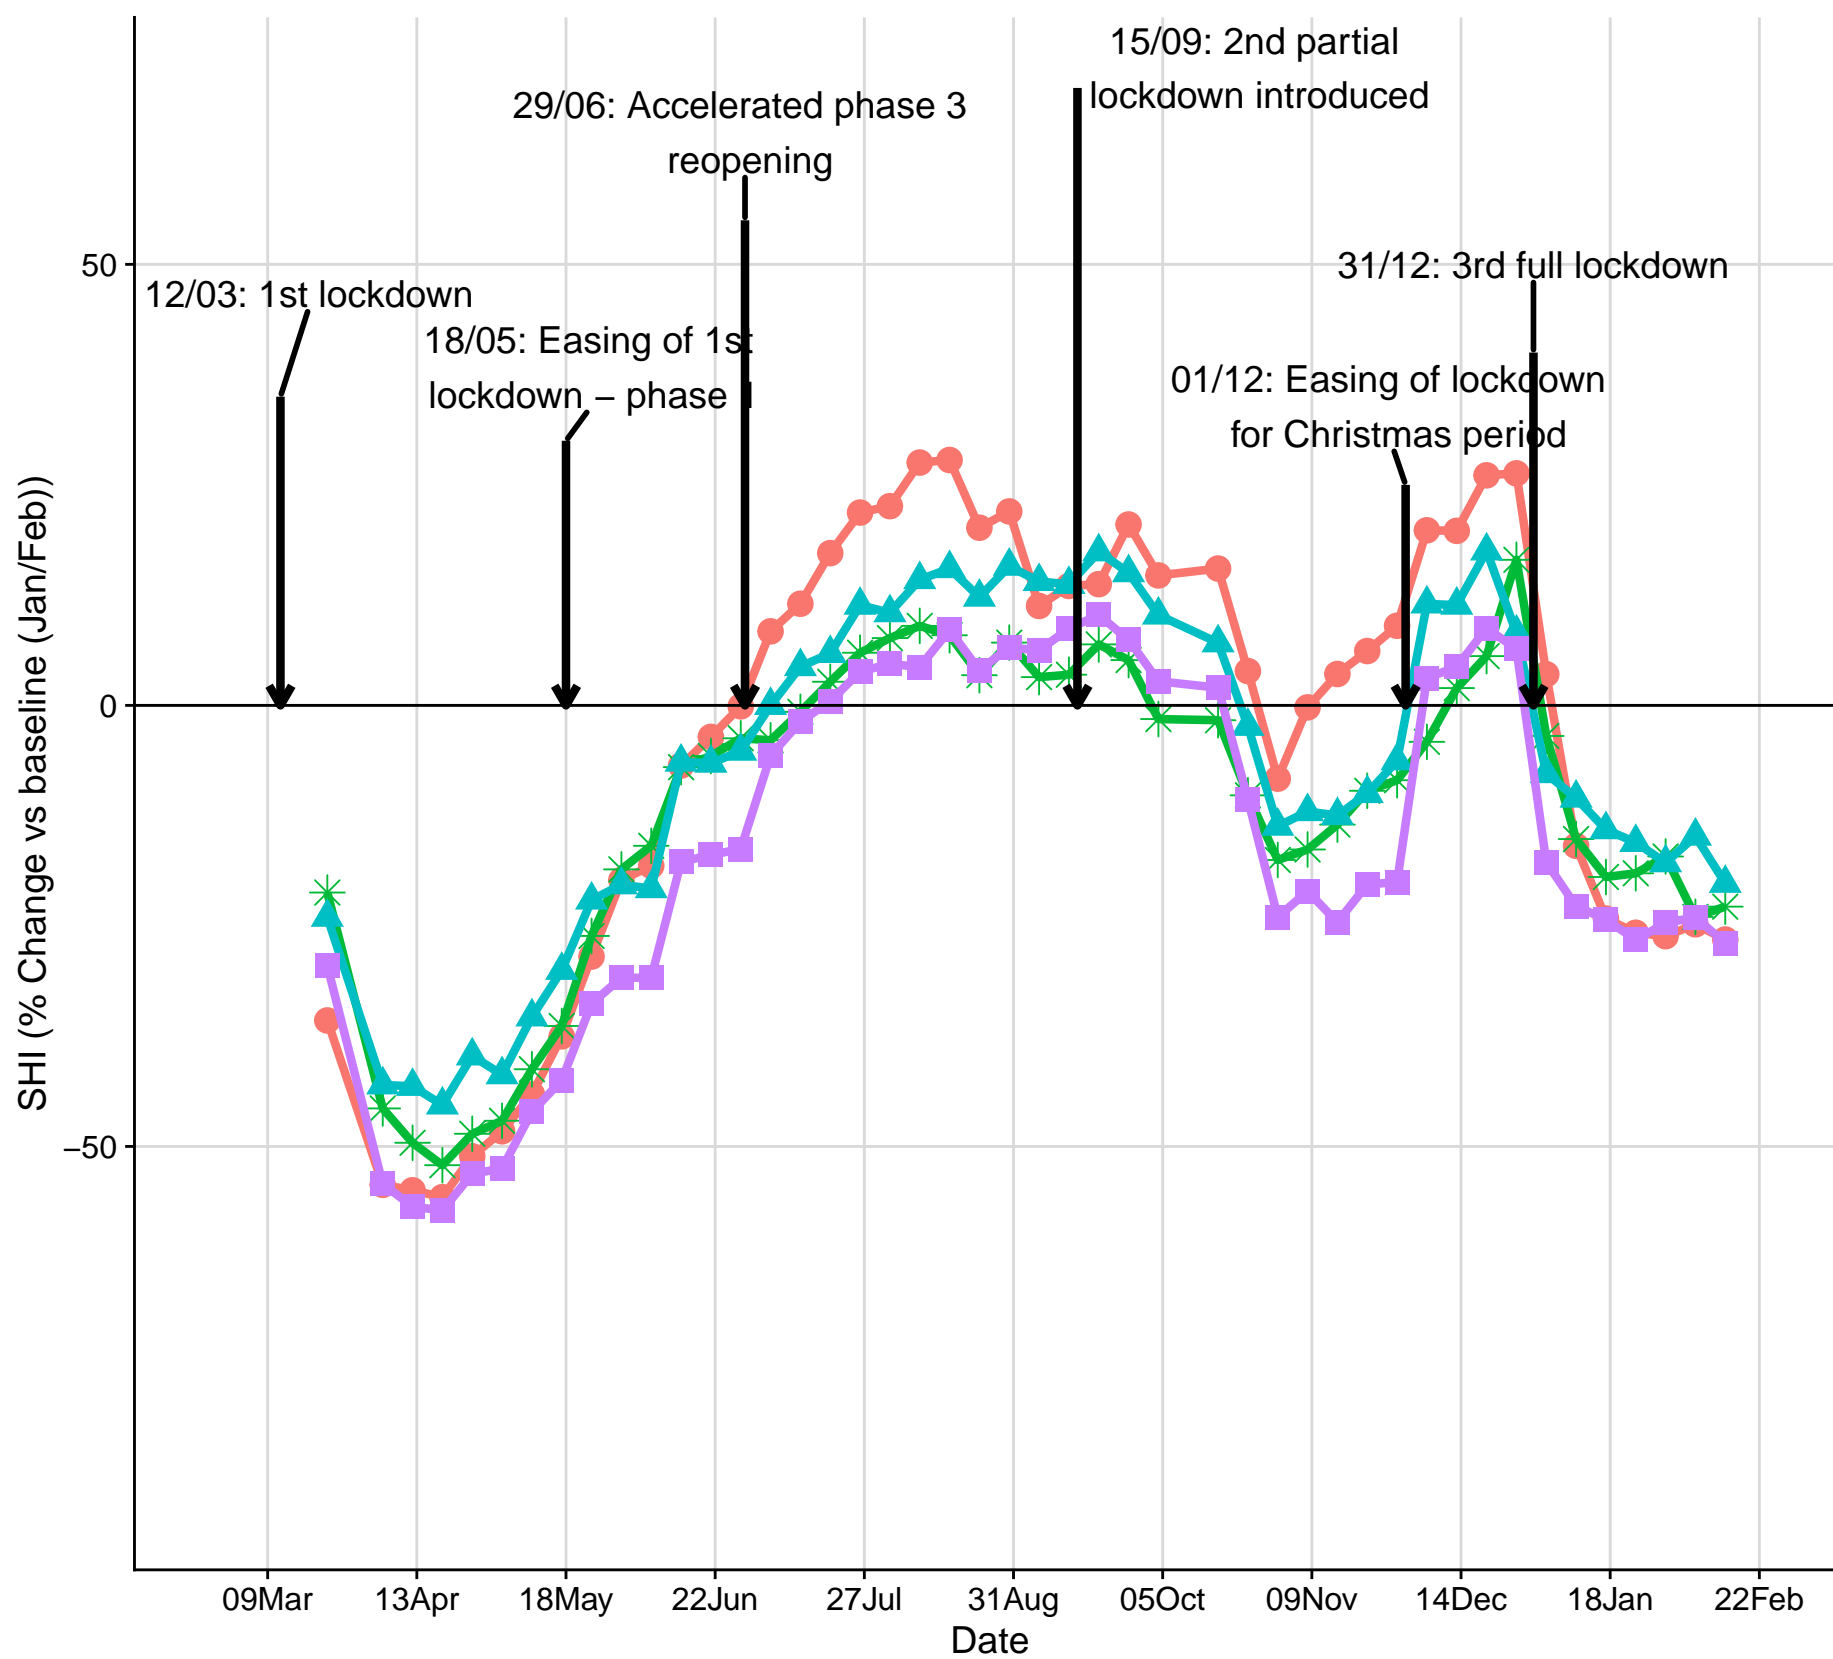

## Westmeath

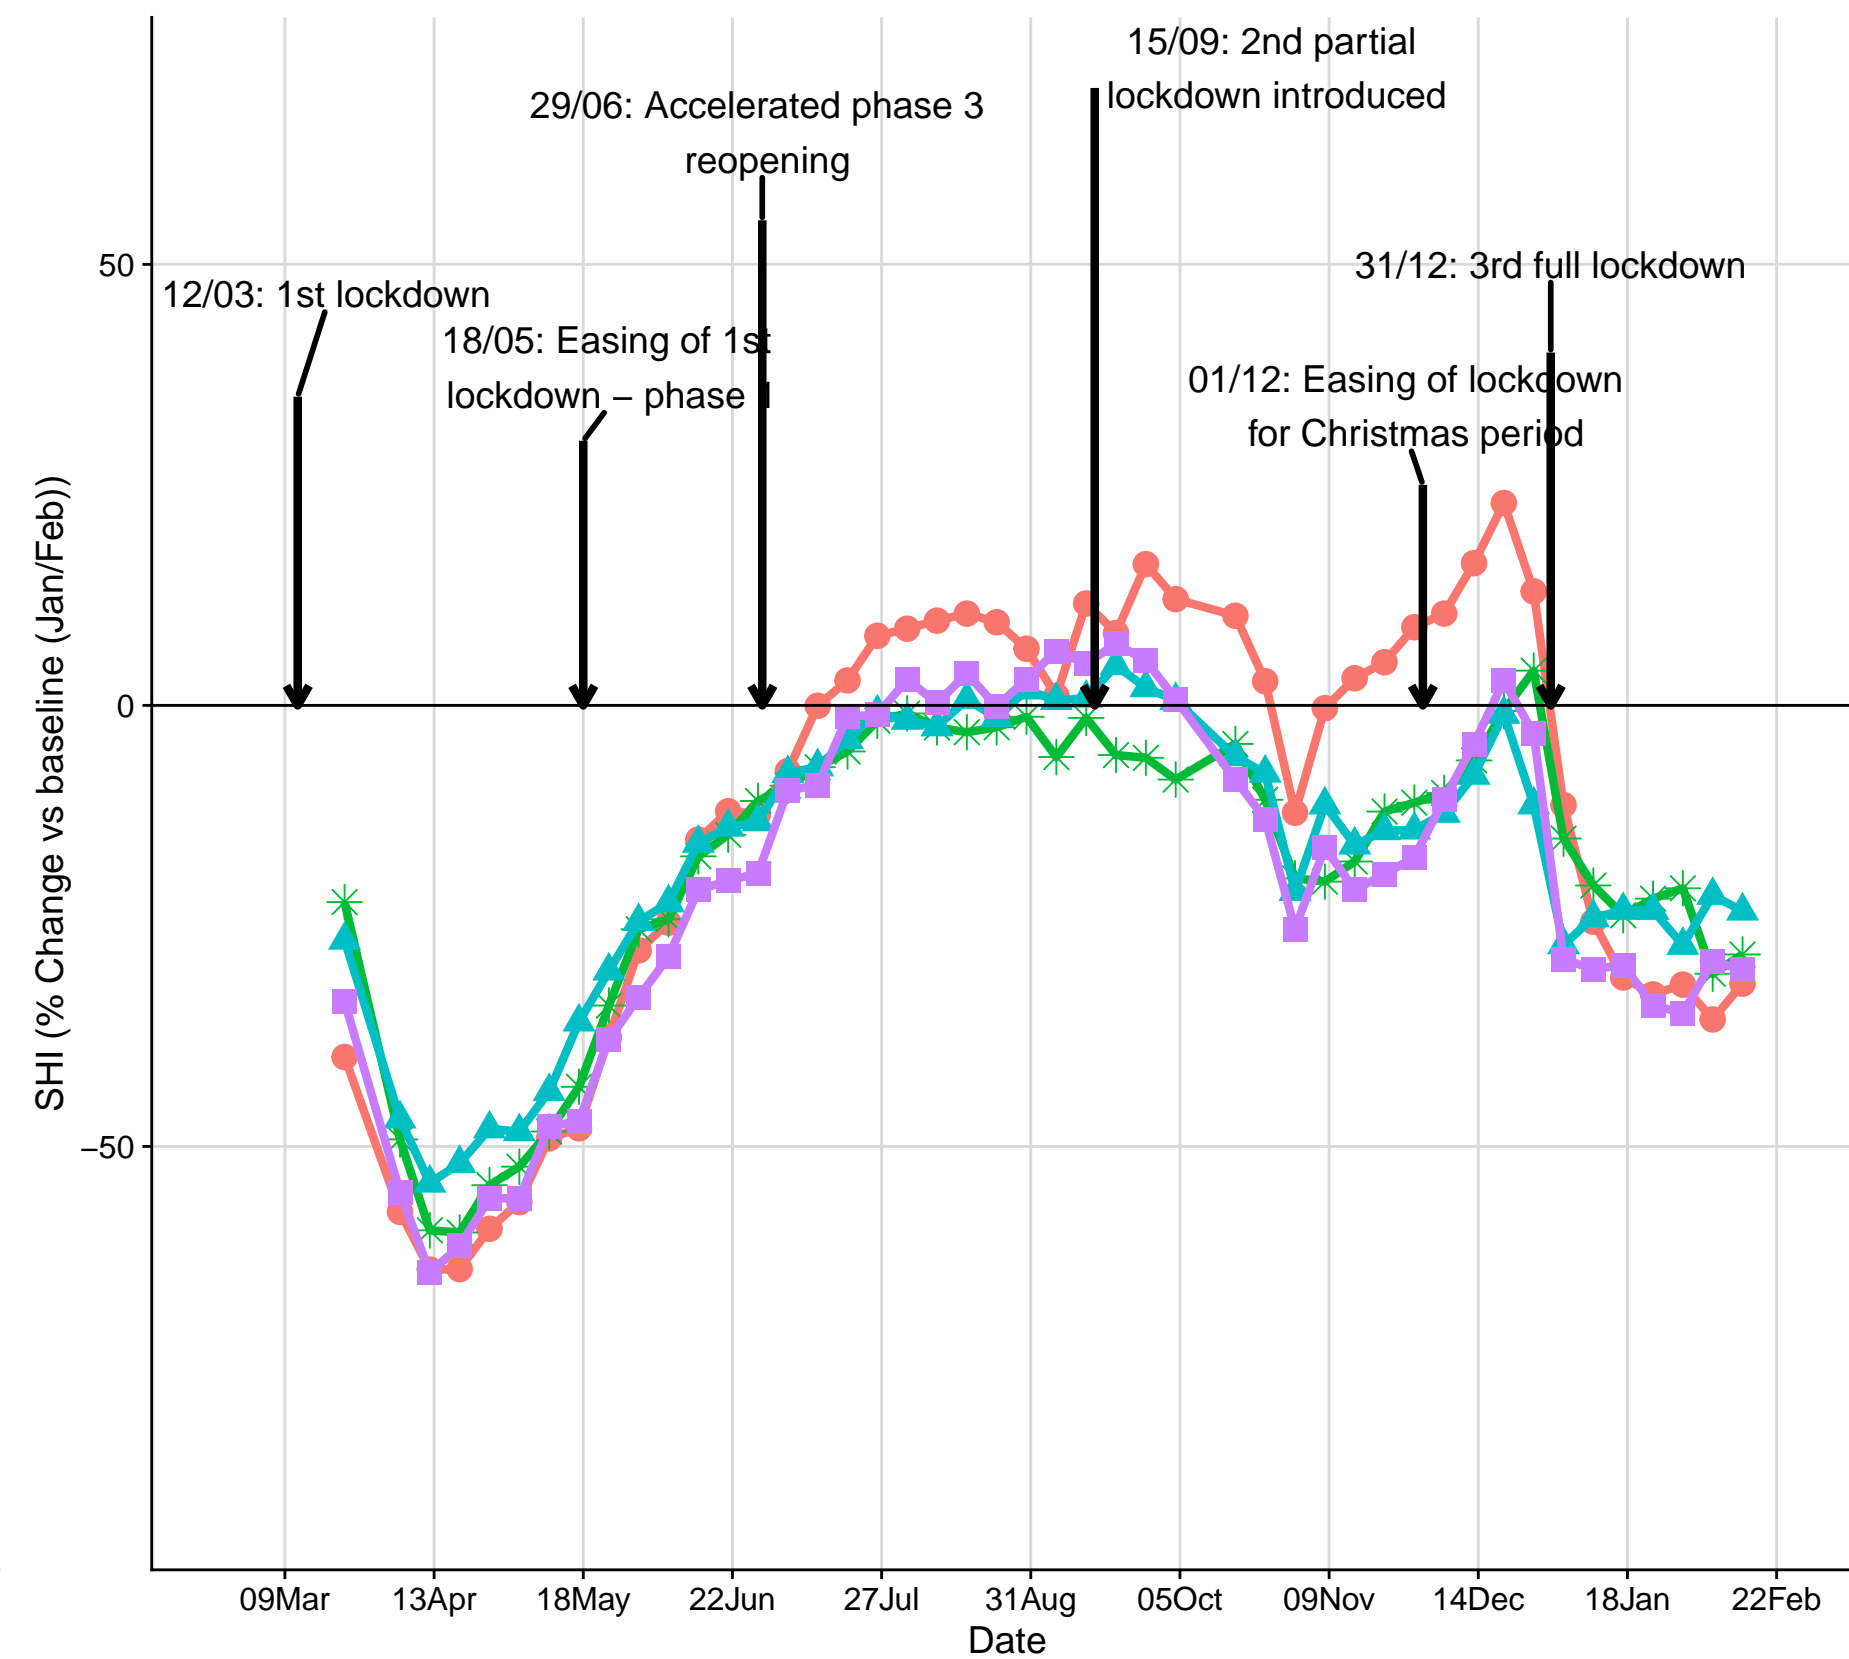

Age Bins ● u20 SHI \* 20-24 SHI ▲ 60-64 SHI ■ o65 SHI

## Wexford

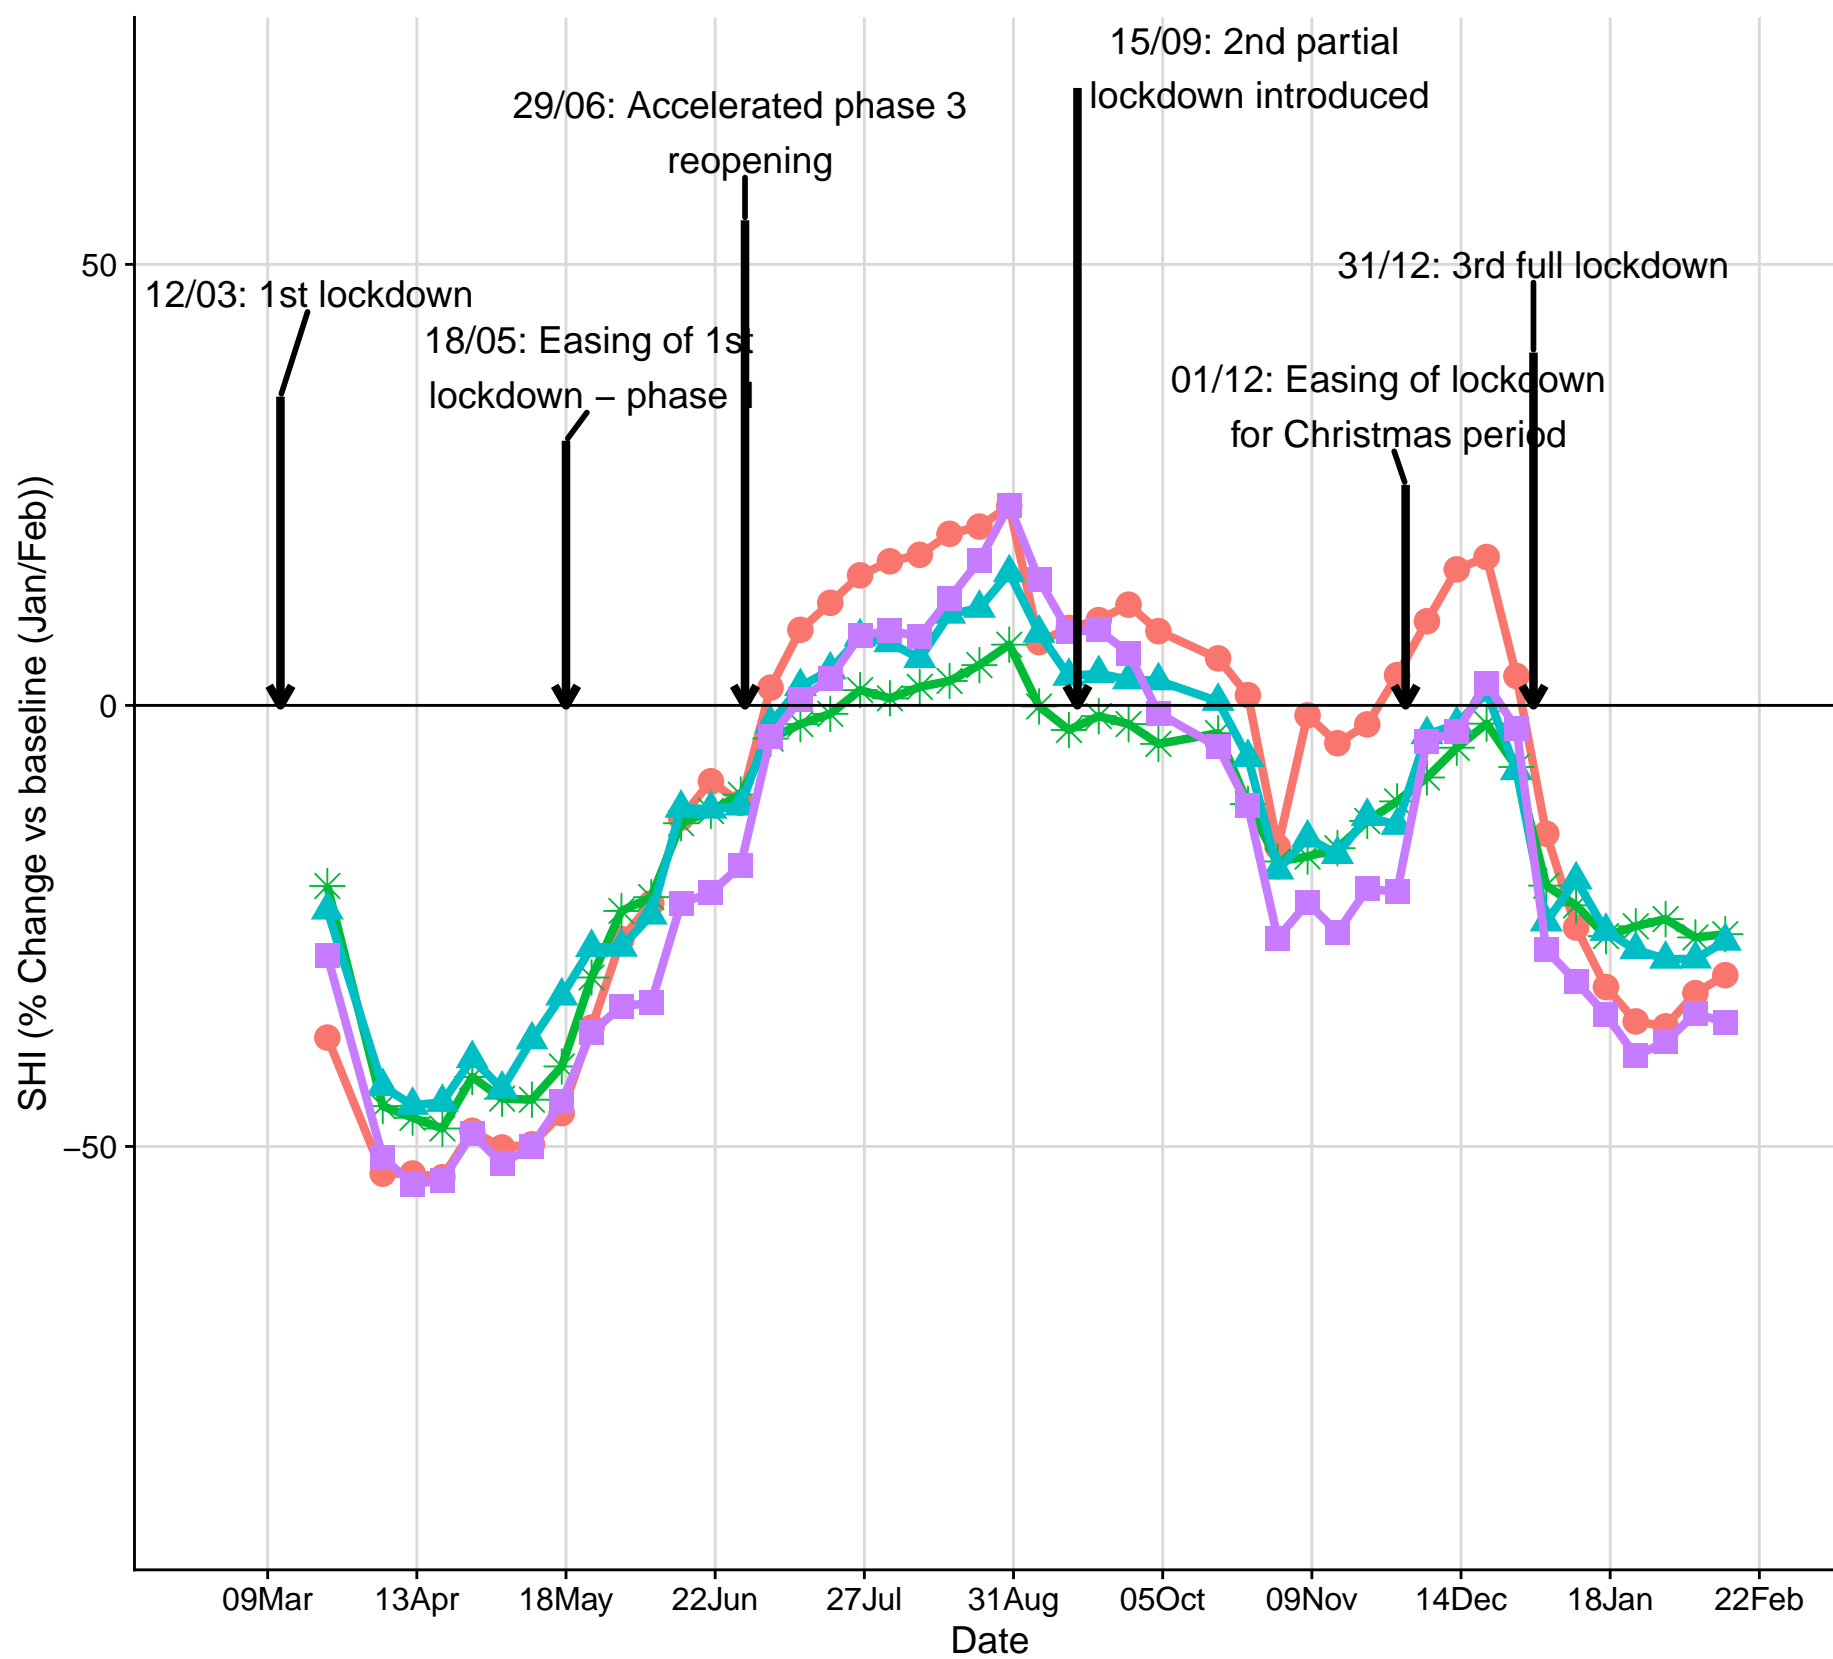

## Wicklow

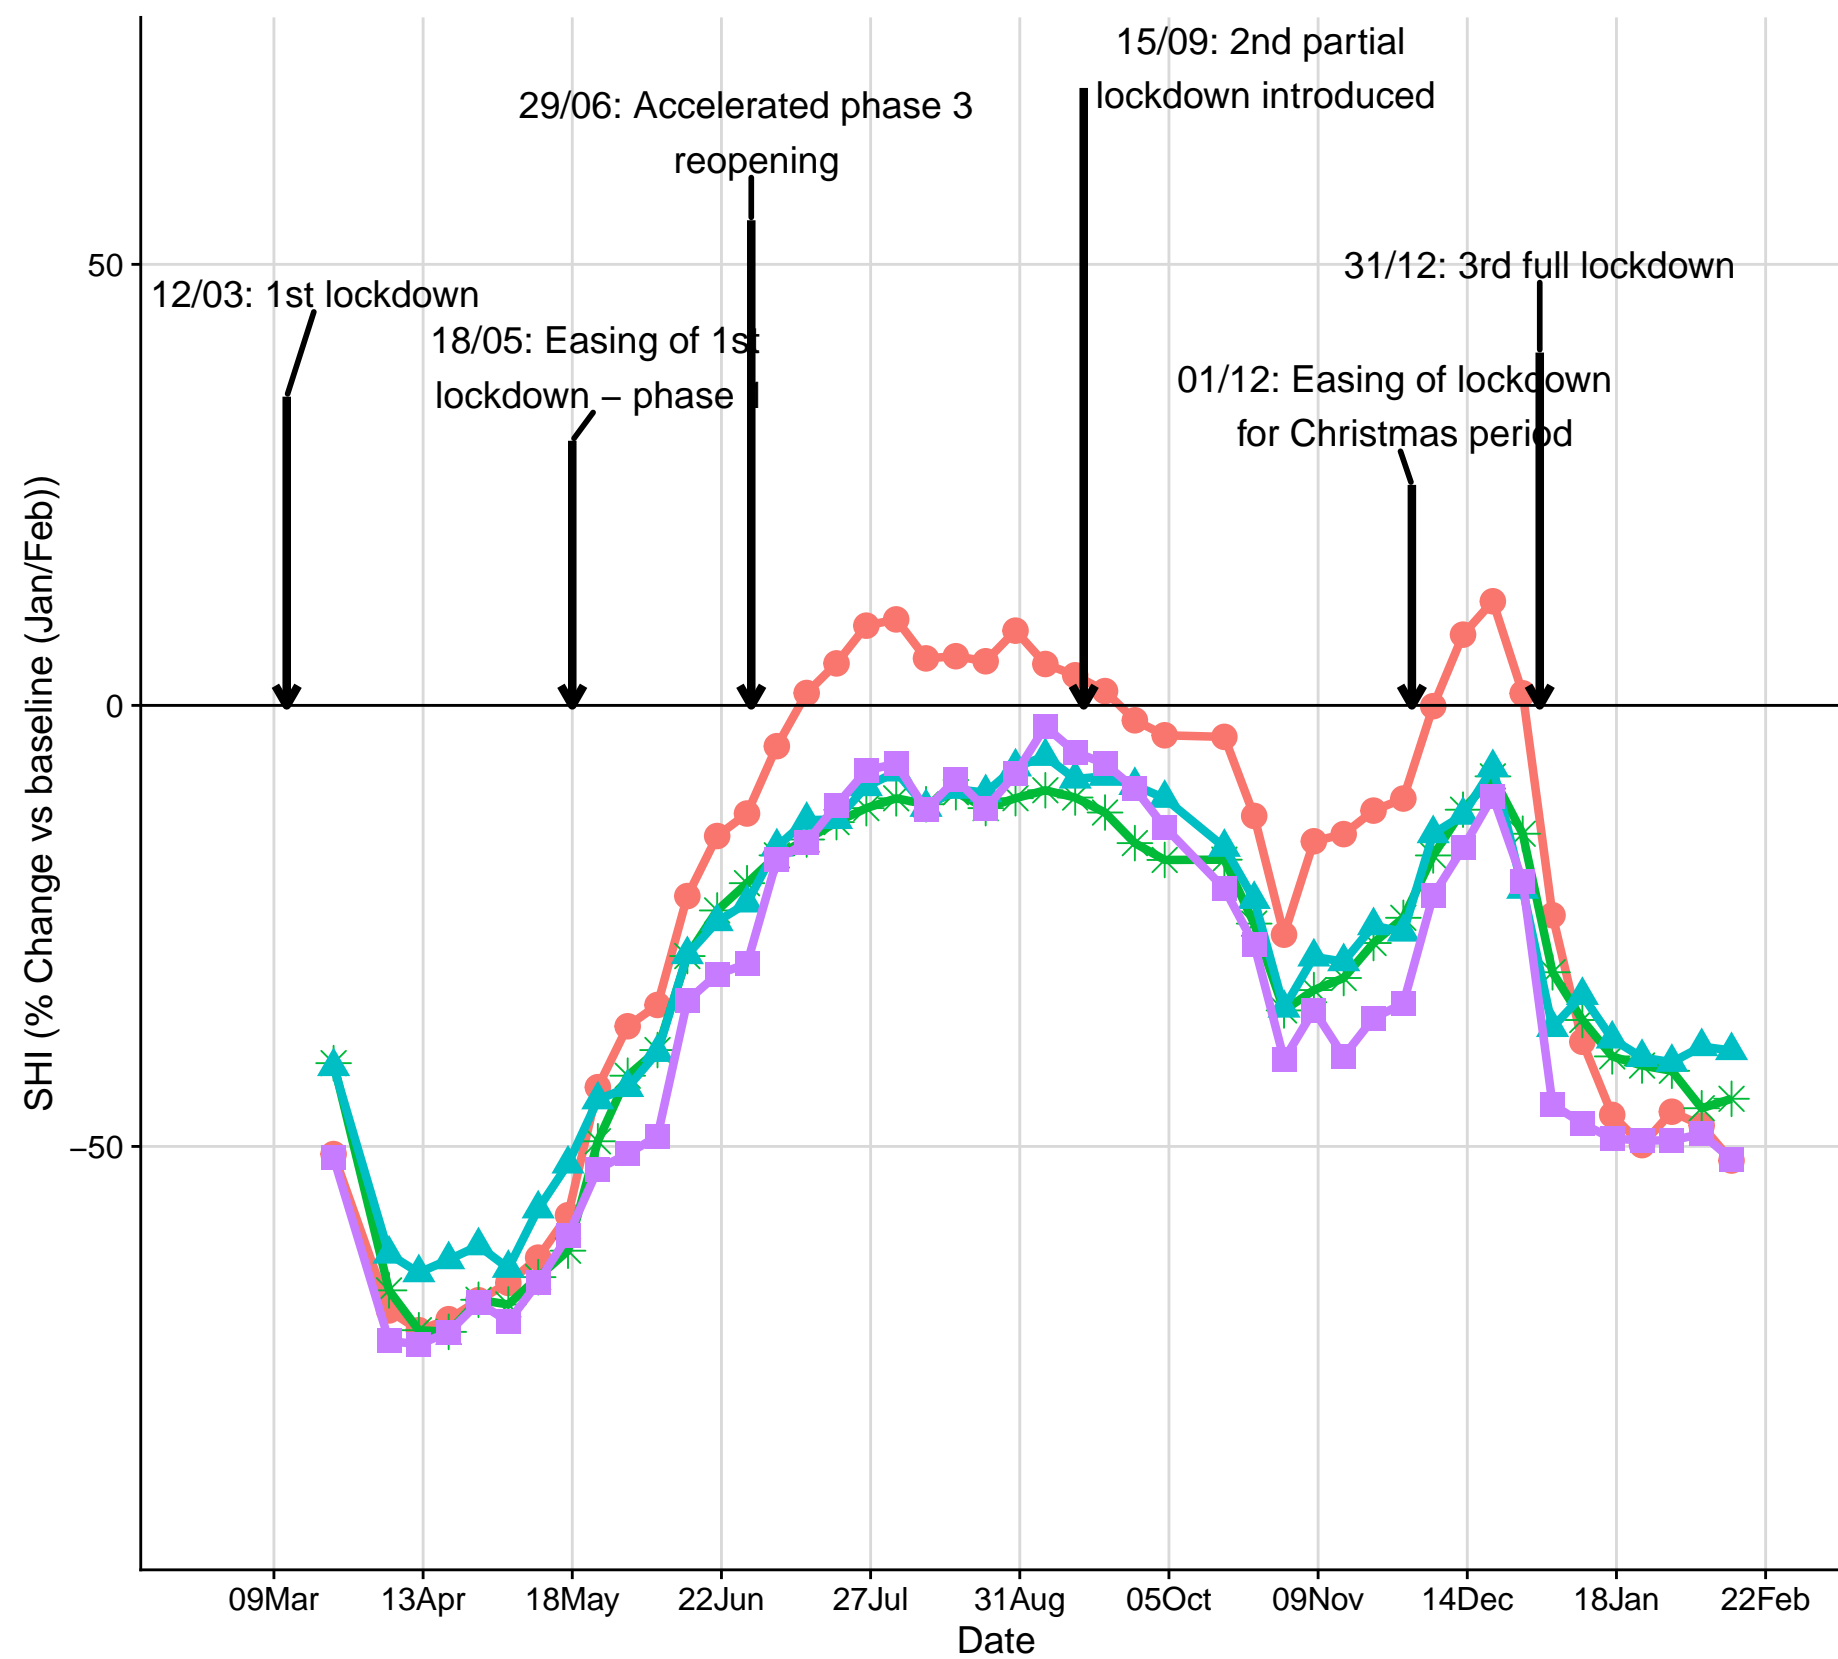

Age Bins ● u20 SHI \* 20–24 SHI ▲ 60–64 SHI ■ o65 SHI
